# Supplementary material for: Correlates with Vaccine Protective Capacity and COVID-19 Disease Symptoms Identified by Serum Proteomics in Vaccinated Individuals
Source: MDPI journal article supplement (doi:10.3390/molecules27185933), 2022-09-13
Supplement: s1 [file s1]

**Data file S2.** Analysis of immunoglobulin proteins underrepresented and overrepresented in infected cohorts when compared to PCR- individuals.

**Part 1.** Analysis of immunoglobulin proteins underrepresented in infected cohorts when compared to PCR- individuals.

### Analytical workflow

1. Select immunoglobulin protein sequences underrepresented in infected cohorts.
2. Protein BLAST sequence alignment against non-redundant protein database(nr)using compositional matrix adjustment ([https://blast.ncbi.nlm.nih.gov/Blast.cgi?PROGRAM=blastp&PAGE\\_TYPE=BlastSearch&LINK\\_LOC=blasthome](https://blast.ncbi.nlm.nih.gov/Blast.cgi?PROGRAM=blastp&PAGE_TYPE=BlastSearch&LINK_LOC=blasthome)).
3. Identification of anti-SARS-CoV-2 immunoglobulin sequences aligned. Criteria: Score > 160 bits, Identity > 60%.
4. Paratome (<http://www.ofranlab.org>) identification of antigen binding regions.
5. Protein BLAST sequence alignment against SARS-CoV-2 using compositional matrix adjustment ([https://blast.ncbi.nlm.nih.gov/Blast.cgi?PROGRAM=blastp&PAGE\\_TYPE=BlastSearch&LINK\\_LOC=blasthome](https://blast.ncbi.nlm.nih.gov/Blast.cgi?PROGRAM=blastp&PAGE_TYPE=BlastSearch&LINK_LOC=blasthome)).
6. Identification of SARS-CoV-2 sequences aligned. Criteria: Score > 15 bits, Identity > 60%.
7. Identification of correlates of vaccine-induced antibody protective epitopes with emphasis on SARS-CoV-2 Spike S RBD domain.

Input data:

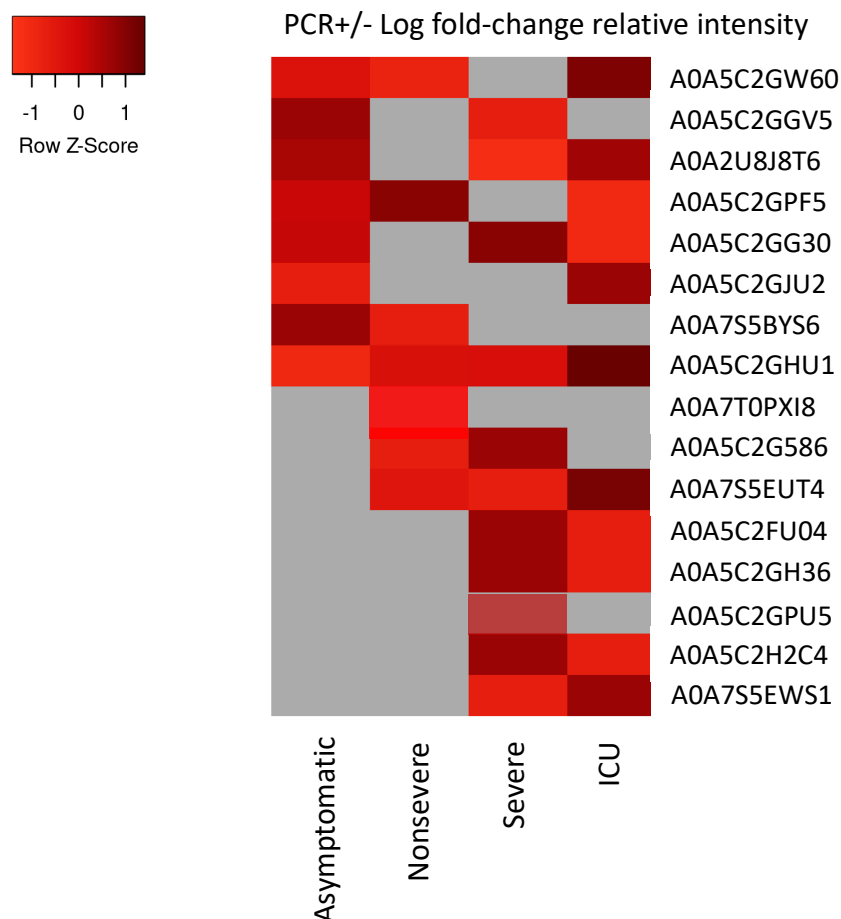

## A0A5C2GW60

```
>tr|A0A5C2GW60|A0A5C2GW60_HUMAN IG c1795_light_IGKV3-15_IGKJ4 (Fragment)
OS=Homo sapiens OX=9606 PE=2 SV=1
QIVMTQSPASLSVFPGDSATLFCRASQRIGGNLAWYQQRPGQAPRLLIYGSSNRAAGVPP
RFSGSGSGTDFTLTINSLRSEDYAVYYCQQHHAWPPAFGGGTKVEIK
```

### BLAST Sequence alignment against nr

```
Query: tr|A0A5C2GW60|A0A5C2GW60_HUMAN IG c1795_light_IGKV3-15_IGKJ4
(Fragment) OS=Homo sapiens OX=9606 PE=2 SV=1 Query ID: lcl|Query_811367
Length: 107
```

```
>anti-SARS-CoV-2 immunoglobulin kappa light chain variable region, partial
[Homo sapiens]
```

```
Sequence ID: QJU69756.1 Length: 109
```

```
>immunoglobulin light chain variable region, partial [Homo sapiens]
```

```
Sequence ID: QYF06493.1 Length: 109
```

```
Range 1: 1 to 109
```

```
Score:176 bits(445), Expect:1e-54,
Method:Compositional matrix adjust.,
Identities:83/109(76%), Positives:97/109(88%), Gaps:2/109(1%)
```

```
Query 1 QIVMTQSPASLSVFPGDSATLFCRASQRIGGNLAWYQQRPGQAPRLLIYGSSNRAAGVPP 60
+IVMTQSPA+LSV PG+ ATL CRASQ + NLAWYQQ+PGQAPRLLIYG+S RA G+P
Sbjct 1 EIVMTQSPATLSVSPGERATLSCRASQSVSSNLAWYQQKPGQAPRLLIYGASTRATGIPA 60

Query 61 RFSGSGSGTDFTLTINSLRSEDYAVYYCQQHHAWPPA--FGGGTKVEIK 107
RFSGSGSGT+FTLTI+SL+SED+AVYYCQQ++ WPP+ FGGGTKVEIK
Sbjct 61 RFSGSGSGTEFTLTISLQSEDFAVYYCQQYNNWPPSLTFGGGTKVEIK 109
```

### Paratome analysis

```
paratome_1_seq_27691_107_bp
ABR L1: QRIGGNLA (27-34)
ABR L2: LLIYGSSNRAA (46-56)
ABR L3: QQHHAWPPA (89-97)
```

### BLAST Sequence alignment against SARS-CoV-2

```
ABR L1: QRIGGNLA (27-34)
No significant similarity found.
```

```
ABR L2: LLIYGSSNRAA (46-56)
>surface glycoprotein [Severe acute respiratory syndrome coronavirus 2]
Sequence ID: UJH96504.1 Length: 1271
Range 1: 751 to 764
```

```
Score:21.4 bits(43), Expect:6037,
Method:,
Identities:9/14(64%), Positives:9/14(64%), Gaps:4/14(28%)
```

```
Query 1 LLIYGSS----NRA 10
LL YGSS NRA
Sbjct 751 LLQYGSSTQLNRA 764
```

```
ABR L3: QQHHAWPPA (89-97)
No significant similarity found.
```

## A0A5C2GGV5

```
>tr|A0A5C2GGV5|A0A5C2GGV5_HUMAN IG c110_light_IGKV4-1_IGKJ4 (Fragment)
OS=Homo sapiens OX=9606 PE=2 SV=1
DIVMTQSPDSLAVSLGERATINCKSSQNILYRANNKNYLAWYQQKPGQPPKLLVSWASTR
ESGVPDRFNGSGSGTDFNLTISSLQAEDVAVYSCQQYYSTPLTFGGGTKVEIK
```

### BLAST Sequence alignment against nr

```
Query: tr|A0A5C2GGV5|A0A5C2GGV5_HUMAN IG c110_light_IGKV4-1_IGKJ4
(Fragment) OS=Homo sapiens OX=9606 PE=2 SV=1 Query ID: lcl|Query_252275
Length: 113
```

```
>anti-SARS-CoV-2 immunoglobulin light chain variable region, partial [Homo
sapiens]
```

```
Sequence ID: QTX15727.1 Length: 113
Range 1: 1 to 113
```

```
Score:218 bits(554), Expect:5e-71,
Method:Compositional matrix adjust.,
Identities:102/113(90%), Positives:109/113(96%), Gaps:0/113(0%)
```

```
Query 1 DIVMTQSPDSLAVSLGERATINCKSSQNILYRANNKNYLAWYQQKPGQPPKLLVSWASTR 60
DIVMTQSPDSLAVSLGERATINCKSSQ++L+ +NNKNY+AWYQQKPGQPPKLL+ WASTR
Sbjct 1 DIVMTQSPDSLAVSLGERATINCKSSQSVLHSSNNKNYVAWYQQKPGQPPKLLIYWASTR 60

Query 61 ESGVPDRFNGSGSGTDFNLTISSLQAEDVAVYSCQQYYSTPLTFGGGTKVEIK 113
ESGVPDRF+GSGSGTDF LTISSLQAEDVAVY CQQYYSTPLTFGGGTKVEIK
Sbjct 61 ESGVPDRFSGSGSGTDFLTISSLQAEDVAVYHCQQYYSTPLTFGGGTKVEIK 113
```

### Paratome analysis

```
paratome_1_seq_27871_113_bp
ABR L1: QNILYRANNKNYLA (27-40)
ABR L2: LLVSWASTRES (52-62)
ABR L3: QQYYSTPL (95-102)
```

### BLAST Sequence alignment against SARS-CoV-2

```
ABR L1: QNILYRANNKNYLA (27-40)
>ORF10 protein [Severe acute respiratory syndrome coronavirus 2]
Sequence ID: UDE38504.1 Length: 38
>ORF10 protein [Severe acute respiratory syndrome coronavirus 2]
Sequence ID: UDN73246.1 Length: 38
>ORF10 protein [Severe acute respiratory syndrome coronavirus 2]
Sequence ID: UEF92301.1 Length: 38
>ORF10 protein [Severe acute respiratory syndrome coronavirus 2]
Sequence ID: UEI16040.1 Length: 38
>ORF10 protein [Severe acute respiratory syndrome coronavirus 2]
Sequence ID: UEI16377.1 Length: 38
Range 1: 18 to 28
```

```
Score:24.8 bits(51), Expect:619,
Method:,
Identities:7/11(64%), Positives:7/11(63%), Gaps:0/11(0%)
```

```
Query 4 LYRANNKNYLA 14
LYR N NY A
Sbjct 18 LYRMNSRNYIA 28
```

```
>surface glycoprotein [Severe acute respiratory syndrome coronavirus 2]
Sequence ID: UJT26857.1 Length: 1270
```

Range 1: 910 to 918

Score:21.4 bits(43), Expect:10532,  
Method:,  
Identities:7/10(70%), Positives:8/10(80%), Gaps:1/10(10%)

Query 1 QNILYRANNK 10  
QN+LY AN K  
Sbjct 910 QNVLY-ANQK 918

ABR L2: LLVSWASTRES (52-62)

>ORF1ab polyprotein, partial [Severe acute respiratory syndrome coronavirus 2]  
Sequence ID: QZK57390.1 Length: 7077  
Range 1: 4948 to 4956

Score:19.7 bits(39), Expect:25032,  
Method:,  
Identities:6/9(67%), Positives:6/9(66%), Gaps:0/9(0%)

Query 1 LLVSWASTR 9  
LL S A TR  
Sbjct 4948 LLXSXAATR 4956

ABR L3: QQYYSTPL (95-102)

>ORF3a protein [Severe acute respiratory syndrome coronavirus 2]  
Sequence ID: UIJ25215.1 Length: 275  
Range 1: 213 to 219

Score:19.7 bits(39), Expect:13007,  
Method:,  
Identities:6/7(86%), Positives:6/7(85%), Gaps:0/7(0%)

Query 2 QQYYSTPL 8  
Q YSTPL  
Sbjct 213 QLYSTPL 219

>ORF1ab polyprotein [Severe acute respiratory syndrome coronavirus 2]  
Sequence ID: QYZ75299.1 Length: 7096  
Range 1: 4171 to 4175

Score:18.0 bits(35), Expect:53647,  
Method:,  
Identities:4/5(80%), Positives:4/5(80%), Gaps:0/5(0%)

Query 3 YYSTP 7  
YY TP  
Sbjct 4171 YYNTP 4175

## AOA2U8J8T6

```
>tr|AOA2U8J8T6|AOA2U8J8T6_HUMAN Ig heavy chain variable region (Fragment)
OS=Homo sapiens OX=9606 GN=IgH PE=2 SV=1
GSGYSFSGYWIVVWRQMPGKGLEWMGLIYPDDSNTRYSPSFQGQVTFSSADKSITTAYLQW
SSLRASDTAIYYCARLSGPNRIMRAHWFDPPWGQGLTVTVSS
```

### BLAST Sequence alignment against nr

```
Query: tr|AOA2U8J8T6|AOA2U8J8T6_HUMAN Ig heavy chain variable region
(Fragment) OS=Homo sapiens OX=9606 GN=IgH PE=2 SV=1 Query ID:
lcl|Query_416432 Length: 101
```

```
>anti-SARS-CoV-2 immunoglobulin heavy chain variable region, partial [Homo
sapiens]
```

```
Sequence ID: UKB89132.1 Length: 126
```

```
Range 1: 24 to 126
```

```
Score:161 bits(408), Expect:7e-49,
Method:Compositional matrix adjust.,
Identities:82/103(80%), Positives:90/103(87%), Gaps:2/103(1%)
```

```
Query 1 GSGYSFSGYWIVVWRQMPGKGLEWMGLIYPDDSNTRYSPSFQGQVTFSSADKSITTAYLQW 60
        GSGYSF+ YWI VWRQMPGKGLEWMG+IYP DS+TRYSPSFQGQVT SADKSI+TAYLQW
Sbjct 24 GSGYSFTSYWIGWVRQMPGKGLEWMGLIYPGSDSDTRYSPSFQGQVTISADKSISTAYLQW 83

Query 61 SSLRASDTAIYYCAR-LSGPNRIM-RAHWFDPPWGQGLTVTVSS 101
        SSL+ASDTA+YYCAR +SG + WFDPPWGQGLTVTVSS
Sbjct 84 SSLKASDTAMYYCARHMSGTHSSGWYERWFDPPWGQGLTVTVSS 126
```

### Paratome analysis

```
paratome_1_seq_28012_101_bp
```

```
Could not find ABR1
```

```
ABR H2: WMGLIYPDDSNTRY (24-37)
```

```
ABR H3: RLSGPNRIMRAHWFDPP (75-90)
```

### BLAST Sequence alignment against SARS-CoV-2

```
ABR H2: WMGLIYPDDSNTRY (24-37)
```

```
>Chain B, S2X303 Fab heavy chain [Severe acute respiratory syndrome
coronavirus 2]
```

```
Sequence ID: 7SOE_B Length: 125
```

```
>Chain E, S2X303 Fab heavy chain [Severe acute respiratory syndrome
coronavirus 2]
```

```
Sequence ID: 7SOE_E Length: 125
```

```
>Chain H, S2X303 Fab heavy chain [Severe acute respiratory syndrome
coronavirus 2]
```

```
Sequence ID: 7SOE_H Length: 125
```

```
Range 1: 49 to 54
```

```
Score:18.9 bits(37), Expect:86006,
Method:,
Identities:4/6(67%), Positives:5/6(83%), Gaps:0/6(0%)
```

```
Query 1 WMGLIY 6
        W+ LIY
Sbjct 49 WLALIY 54
```

```
ABR H3: RLSGPNRIMRAHWFDPP (75-90)
```

```
>ORF1a polyprotein [Severe acute respiratory syndrome coronavirus 2]
Sequence ID: UCK56015.1 Length: 4405
```

Range 1: 3662 to 3668

Score:21.0 bits(42), Expect:20697,

Method:

Identities:6/9(67%), Positives:6/9(66%), Gaps:2/9(22%)

Query 7 RIMRAHWFD 15

RIMR W D

Sbjct 3662 RIMR--WLD 3668

>surface glycoprotein, partial [Severe acute respiratory syndrome  
coronavirus 2]

Sequence ID: QTM47912.1 Length: 1259

Range 1: 1086 to 1089

Score:18.9 bits(37), Expect:118712,

Method:

Identities:4/4(100%), Positives:4/4(100%), Gaps:0/4(0%)

Query 11 AHWF 14

AHWF

Sbjct 1086 AHWF 1089

## A0A5C2GPF5

```
>tr|A0A5C2GPF5|A0A5C2GPF5_HUMAN IG c1256_heavy_IGHV3-23_IGHD3-3_IGHJ6
(Fragment) OS=Homo sapiens OX=9606 PE=2 SV=1
EVQLLESQGGGRLHPGGSLRLSCAASGFTFNYYAMSWVRQAPKGLEWVSAVSGSGASTYY
ADSVKGRFTISRDN SKNTLYLQMSSLRVEDTAVYYCAKVARLTVFGVVNTGHFMDVWGKG
TTVTVSS
```

### BLAST Sequence alignment against nr

```
Query: tr|A0A5C2GPF5|A0A5C2GPF5_HUMAN IG c1256_heavy_IGHV3-23_IGHD3-3_IGHJ6
(Fragment) OS=Homo sapiens OX=9606 PE=2 SV=1 Query ID: lcl|Query_615149
Length: 127
```

```
>anti-SARS-CoV-2 spike protein immunoglobulin heavy chain variable region,
partial [Homo sapiens]
Sequence ID: QKY76482.1 Length: 124
Range 1: 1 to 124
```

```
Score:204 bits(519), Expect:2e-65,
Method:Compositional matrix adjust.,
Identities:101/127(80%), Positives:109/127(85%), Gaps:3/127(2%)
```

```
Query 1 EVQLLESQGGGRLHPGGSLRLSCAASGFTFNYYAMSWVRQAPKGLEWVSAVSGSGASTYY 60
EVQLL+SGGG + PGGSLRLSCAASGFTF NYAMSWVRQAP KGLEWVSA+SGSG +TYY
Sbjct 1 EVQLLQSGGGLVQPGGSLRLSCAASGFTFRNYAMSWVRQAPGKLEWVSAISGSGGTYY 60

Query 61 ADSVKGRFTISRDN SKNTLYLQMSSLRVEDTAVYYCAKVARLTVFGVVNTGHFMDVWGKG 120
ADSVKGRFTISRDN SKNTLYLQM+SLR EDTAVYYCAK R+T+ VV D WG+G
Sbjct 61 ADSVKGRFTISRDN SKNTLYLQMNSLRAEDTAVYYCAKNERITMLVVVT---LFDYWGGQ 117

Query 121 TTVTSS 127
T VTVSS
Sbjct 118 TLVTSS 124
```

### Paratome analysis

```
paratome_1_seq_28214_127_bp
ABR H1: FTFNYYAMS (27-35)
ABR H2: WWSAVSGSGASTYY (47-60)
ABR H3: KVARLTVFGVVNTGHFMDV (98-116)
```

### BLAST Sequence alignment against SARS-CoV-2

```
ABR H1: FTFNYYAMS (27-35)
>ORFlab polyprotein [Severe acute respiratory syndrome coronavirus 2]
Sequence ID: UKG54270.1 Length: 7089
Range 1: 4461 to 4467
```

```
Score:20.6 bits(41), Expect:8026,
Method:,
Identities:5/7(71%), Positives:5/7(71%), Gaps:0/7(0%)
```

```
Query 2 TFNYYAM 8
TF NY M
Sbjct 4461 TFSNYQM 4467
```

```
ABR H2: WWSAVSGSGASTYY (47-60)
```

```
>surface glycoprotein, partial [Severe acute respiratory syndrome
coronavirus 2]
Sequence ID: QRX36841.1 Length: 682
Range 1: 256 to 266
```

Score:21.8 bits(44), Expect:7419,  
Method:,  
Identities:8/11(73%), Positives:8/11(72%), Gaps:2/11(18%)

Query 6 SG--SGASTYY 14  
SG SGAS YY  
Sbjct 256 SGWTSGASAYY 266

ABR H3: KVARLTVFGVVNTGHFMDV (98-116)

>ORFlab polyprotein, partial [Severe acute respiratory syndrome coronavirus  
2]

Sequence ID: UIQ72354.1 Length: 6975

Range 1: 6338 to 6346

Score:28.2 bits(59), Expect:88,  
Method:,  
Identities:8/9(89%), Positives:8/9(88%), Gaps:0/9(0%)

Query 8 FGVVNTGHF 16  
F VVNTGHF  
Sbjct 6338 FNVVNTGHF 6346



## A0A5C2GG30

```
>tr|A0A5C2GG30|A0A5C2GG30_HUMAN IG c723_heavy_IGHV4-39_IGHD6-6_IGHJ3
(Fragment) OS=Homo sapiens OX=9606 PE=2 SV=1
QVQLQESGPGLVKPSSETLSLTCTVSGYYISSGYYWGCIRQPPGKGLEWIGSIHHSGSTYY
NPSLKSRVTISVDTSKNQFSLKLRSVTATDTAVYYCARRLPEQLVGSDAFDIWGQGTMTV
VSS
```

### BLAST Sequence alignment against nr

```
Query: tr|A0A5C2GG30|A0A5C2GG30_HUMAN IG c723_heavy_IGHV4-39_IGHD6-6_IGHJ3
(Fragment) OS=Homo sapiens OX=9606 PE=2 SV=1 Query ID: lcl|Query_141113
Length: 123
```

```
>anti-SARS-CoV-2 immunoglobulin heavy chain variable region, partial [Homo
sapiens]
```

```
Sequence ID: UKB89162.1 Length: 123
Range 1: 1 to 123
```

```
Score:186 bits(471), Expect:4e-58,
Method:Compositional matrix adjust.,
Identities:105/124(85%), Positives:111/124(89%), Gaps:2/124(1%)
```

```
Query 1 QVQLQESGPGLVKPSSETLSLTCTVsgyyissgyyw-gCIRQPPGKGLEWIGSIHHSGSTY 59
Q+QLQESGPGLVKPSSETLSLTCTVSG ISS Y+ G IRQPPGKGLEWIGSI++SGSTY
Sbjct 1 QLQLQESGPGLVKPSSETLSLTCTVSGGSISSSSYWGWIWIRQPPGKGLEWIGSIYYSGSTY 60

Query 60 YNPSLKSRVTISVDTSKNQFSLKLRSVTATDTAVYYCARRLPEQLVGSDAFDIWGQGTMTV 119
YNPSLKSRVTISVDTSKNQFSLKL SVTA DTAVYYCAR+ +L G DAFDIWGQGTMTV
Sbjct 61 YNPSLKSRVTISVDTSKNQFSLKLSSVTAADTAVYYCARQSSPKL-GDDAFDIWGQGTMTV 119

Query 120 TVSS 123
TVSS
Sbjct 120 TVSS 123
```

### Paratome analysis

```
paratome_1_seq_28371_123_bp
ABR H1: YYISSGYYWGC (27-37)
ABR H2: WIGSIHHSGSTYY (48-60)
ABR H3: RRLPEQLVGSDAFDI (98-112)
```

### BLAST Sequence alignment against SARS-CoV-2

```
ABR H1: YYISSGYYWGC (27-37)
>ORF3a protein [Severe acute respiratory syndrome coronavirus 2]
Sequence ID: QTW51530.1 Length: 275
Range 1: 206 to 212
```

```
Score:20.6 bits(41), Expect:12304,
Method:,
Identities:5/7(71%), Positives:5/7(71%), Gaps:0/7(0%)
```

```
Query 2 YISSGYY 8
YI S YY
Sbjct 206 YITSDYY 212
```

```
ABR H2: WIGSIHHSGSTYY (48-60)
>surface glycoprotein [Severe acute respiratory syndrome coronavirus 2]
Sequence ID: UIL01164.1 Length: 1271
Range 1: 64 to 72
```

```
Score:19.7 bits(39), Expect:36472,
Method:,
```

Identities:5/9(56%), Positives:5/9(55%), Gaps:0/9(0%)

```
Query 1  WIGSIHHSG 9
      W  IH SG
Sbjct 64  WXXAIHXSG 72
```

ABR H3: RRLPEQLVGSDAFDI (98-112)

>nucleocapsid phosphoprotein [Severe acute respiratory syndrome coronavirus 2]

Sequence ID: UH063712.1 Length: 419

Range 1: 276 to 284

Score:21.4 bits(43), Expect:12409,

Method:,

Identities:6/9(67%), Positives:6/9(66%), Gaps:0/9(0%)

```
Query 1  RRLPEQLVG 9
      RR PEQ  G
Sbjct 276  RRXPEQXXG 284
```

## A0A5C2GJU2

```
>tr|A0A5C2GJU2|A0A5C2GJU2_HUMAN IG c195_heavy_IGHV3-30_IGHD1-26_IGHJ4
(Fragment) OS=Homo sapiens OX=9606 PE=2 SV=1
QVQLVESGGGVVQPGRSLRLSCAASGFSFSNYGMHWVRQAPGKGLEWLSVISYDGNIKYY
VDSVKGRFTISRDN SKNTLYLEMNSLRAEDSAVYYCAKGV EWELLKYLD SWGHGTLVTVSS
```

### BLAST Sequence alignment against nr

```
Query: tr|A0A5C2GJU2|A0A5C2GJU2_HUMAN IG c195_heavy_IGHV3-30_IGHD1-26_IGHJ4
(Fragment) OS=Homo sapiens OX=9606 PE=2 SV=1 Query ID: lcl|Query_80258
Length: 121
```

```
>anti-SARS-CoV-2 spike protein immunoglobulin heavy chain variable region,
partial [Homo sapiens]
Sequence ID: QKY76580.1 Length: 120
Range 1: 1 to 120
```

```
Score:212 bits(540), Expect:8e-69,
Method:Compositional matrix adjust.,
Identities:103/121(85%), Positives:110/121(90%), Gaps:1/121(0%)
```

```
Query 1 QVQLVESGGGVVQPGRSLRLSCAASGFSFSNYGMHWVRQAPGKGLEWLSVISYDGNIKYY 60
QVQLVESGGGVVQPGRSLRLSCAASGF+FSNYGMHWVRQAPGKGLEW++VISYDG KYY
Sbjct 1 QVQLVESGGGVVQPGRSLRLSCAASGFTFSNYGMHWVRQAPGKGLEWVAVISYDGTNKYY 60

Query 61 VDSVKGRFTISRDN SKNTLYLEMNSLRAEDSAVYYCAKGV EWELLKYLD SWGHGTLVTVS 120
DSVKGRFTISRDN SKNTLYL+MNSLRA+D+AVYYCAKG L + DSWG GTLVTVS
Sbjct 61 ADSVKGRFTISRDN SKNTLYLQMNSLRADDTAVYYCAKG-RGNYLTFFDSWGQGTLVTVS 119

Query 121 S 121
S
Sbjct 120 S 120
```

### Paratome analysis

```
paratome_1_seq_6084_121_bp
ABR H1: FSFSNYGMH (27-35)
ABR H2: WLSVISYDGNIKYYV (47-61)
ABR H3: KGV EWELLKYLD S (98-110)
```

### BLAST Sequence alignment against SARS-CoV-2

```
ABR H1: FSFSNYGMH (27-35)
```

```
>ORF1ab polyprotein [Severe acute respiratory syndrome coronavirus 2]
Sequence ID: UFG71429.1 Length: 7096
Range 1: 3156 to 3160
```

```
Score:19.7 bits(39), Expect:16289,
Method:,
Identities:5/5(100%), Positives:5/5(100%), Gaps:0/5(0%)
```

```
Query 2 SFSNY 6
SFSNY
Sbjct 3156 SFSNY 3160
```

```
Range 2: 4469 to 4472
```

```
Score:17.2 bits(33), Expect:139431,
Method:,
Identities:4/4(100%), Positives:4/4(100%), Gaps:0/4(0%)
```

Query 3 FSNY 6  
FSNY  
Sbjct 4469 FSNY 4472

ABR H2: WLSVISYDGNIKYYV (47-61)  
>ORF1a polyprotein [Severe acute respiratory syndrome coronavirus 2]  
Sequence ID: UHN63799.1 Length: 4405  
Range 1: 1550 to 1557

Score:18.9 bits(37), Expect:102501,  
Method:,  
Identities:6/9(67%), Positives:6/9(66%), Gaps:1/9(11%)

Query 4 VISYDGNIK 12  
VI YD N K  
Sbjct 1550 VITYD-NLK 1557

ABR H3: KGVWELLKYLD (98-110)

>ORF1ab polyprotein [Severe acute respiratory syndrome coronavirus 2]  
Sequence ID: UAT13595.1 Length: 7096  
Range 1: 4658 to 4665

Score:26.9 bits(56), Expect:92,  
Method:,  
Identities:6/8(75%), Positives:8/8(100%), Gaps:0/8(0%)

Query 3 VEWELLKY 10  
+EW+LLKY  
Sbjct 4658 IEWDLLKY 4665

## AOA7S5BYS6

```
>tr|AOA7S5BYS6|AOA7S5BYS6_HUMAN IGH c384_heavy_IGHV1-69_IGHD4-23_IGHJ6
(Fragment) OS=Homo sapiens OX=9606 PE=2 SV=1
QVQLVQSAAEVKKPGSSVKVSKASGGTFSGYTVSWVRQAPGQGLEWMGAVIPVYGTAQY
AWKFQGRVTISADESTSTAYLDLSRLTSED TAVYYCARGDNGGLGYWYFYMDVWGRGTTIVSS
```

### BLAST Sequence alignment against nr

```
>anti-SARS-CoV-2 spike protein immunoglobulin heavy chain variable region,
partial [Homo sapiens]
Sequence ID: QKY76551.1 Length: 124
Range 1: 1 to 124
```

```
Score:193 bits(490), Expect:6e-61,
Method:Compositional matrix adjust.,
Identities:95/124(77%), Positives:105/124(84%), Gaps:0/124(0%)
```

```
Query 1 QVQLVQSAAEVKKPGSSVKVSKASGGTFSGYTVSWVRQAPGQGLEWMGAVIPVYGTAQY 60
Sbjct 1 QVQLVQS AEVKKPGSSVKVSKASGGTF Y +SWVRQAPGQGLEWMG IP+ GT Y 60

Query 61 AWKFQGRVTISADESTSTAYLDLSRLTSED TAVYYCARGDNGGLGYWYFYMDVWGRGTTV 120
Sbjct 61 A QKFQGRVTI+ADESTSTAY++LS L SEDTAVYYCAR + G+ +Y+ MDVWG+GTTV 120

Query 121 IVSS 124
Sbjct 121 TVSS 124
```

### Paratome analysis

```
paratome_1_seq_6446_124_bp
ABR H1: GTFSGYTVS (27-35)
ABR H2: WMGAVIPVYGTAQY (47-60)
ABR H3: RGDNGGLGYWYFYMDV (98-113)
```

### BLAST Sequence alignment against SARS-CoV-2

```
ABR H1: GTFSGYTVS (27-35)
>ORFlab polyprotein [Severe acute respiratory syndrome coronavirus 2]
Sequence ID: UFU96319.1 Length: 7096
Range 1: 1334 to 1339
```

```
Score:19.7 bits(39), Expect:16424,
Method:,
Identities:5/6(83%), Positives:5/6(83%), Gaps:0/6(0%)
```

```
Query 3 FSGYTV 8
Sbjct 1334 FNGYTV 1339
```

```
ABR H2: WMGAVIPVYGTAQY (47-60)
>surface glycoprotein [Severe acute respiratory syndrome coronavirus 2]
Sequence ID: UAJ56903.1 Length: 1270
Range 1: 149 to 160
```

```
Score:21.0 bits(42), Expect:15102,
Method:,
Identities:6/12(50%), Positives:6/12(50%), Gaps:0/12(0%)
```

```
Query 1 WMGAVIPVYGTA 12
Sbjct 149 WMESVFRVYSSA 160
```

ABR H3: RGDNGGLGYWYFYMDV (98-113)  
>nucleocapsid phosphoprotein, partial [Severe acute respiratory syndrome  
coronavirus 2]  
Sequence ID: UBE05898.1 Length: 416  
Range 1: 95 to 111

Score:22.7 bits(46), Expect:5107,  
Method:,  
Identities:7/17(41%), Positives:9/17(52%), Gaps:4/17(23%)

|       |    |               |      |     |
|-------|----|---------------|------|-----|
| Query | 1  | RGDNGGLGY---- | WYFY | 13  |
|       |    | RG +G +       | WYFY |     |
| Sbjct | 95 | RGGDGXMXXXXXR | WYFY | 111 |

## AOA5C2GHU1

QLRLVQSGGEVRKPGASVKVSCQTSYGYSFTNFAVSWVRQAPGHGLEWMGRISGSNGVADYAQDFQDRVMTTDDTV  
TSTAYMEMRSLTSDDTAIYYCARDRLDYYENSAYFLGHDGFDIWGQGTMTVTVLS

Ig Heavy variable >tr|AOA5C2GHU1|AOA5C2GHU1\_HUMAN IG c789\_heavy\_IGHV1-  
18\_IGHD3-22\_IGHJ3 (Fragment) OS=Homo sapiens OX=9606 PE=2 SV=1

### BLAST Sequence alignment against nr

Query: tr|AOA5C2GHU1|AOA5C2GHU1\_HUMAN IG c789\_heavy\_IGHV1-18\_IGHD3-22\_IGHJ3  
(Fragment) OS=Homo sapiens OX=9606 PE=2 SV=1 Query ID: lcl|Query\_540851  
Length: 130

>anti-SARS-CoV-2 immunoglobulin heavy chain variable region, partial [Homo  
sapiens]

Sequence ID: UKB89114.1 Length: 131

Range 1: 1 to 131

Score:161 bits(408), Expect:3e-48,

Method:Compositional matrix adjust.,

Identities:89/131(68%), Positives:105/131(80%), Gaps:1/131(0%)

|       |     |                                                               |     |
|-------|-----|---------------------------------------------------------------|-----|
| Query | 1   | QLRLVQSGGEVRKPGASVKVSCQTSYGYSFTNFAVSWVRQAPGHGLEWMGRISGSNGVADY | 60  |
|       |     | Q++LVQSG EV+KPGASVKVSC+ SGY+FT++ +SWVRQAPG GLEWMG IS NG +Y    |     |
| Sbjct | 1   | QVQLVQSGAEVKKPGASVKVSCASGYTFTSYGISWVRQAPGQGLEWMGWISAYNGNTNY   | 60  |
| Query | 61  | AQDFQDRVtmtdtvtstAYMEMRSLTSDDTAIYYCARDRLDYYENSAYF-LGHDGFDI    | 119 |
|       |     | AQ Q RVTMTTDT TSTAYME+RSL SDDTA+YYCARD YY++S Y+ + FD          |     |
| Sbjct | 61  | AQKLQGRVTMTTDTSTSTAYMELRSLRSDDTAVYYCARDGTSHYYDSSGYYGADRNWFDP  | 120 |
| Query | 120 | WGQGTMTVTVLS                                                  | 130 |
|       |     | WGQGT+VTV S                                                   |     |
| Sbjct | 121 | WGQGTLVTVSS                                                   | 131 |

>anti-SARS-CoV-2 immunoglobulin heavy chain variable region, partial [Homo  
sapiens]

Sequence ID: QTX15776.1 Length: 122

Range 1: 1 to 122

Score:161 bits(407), Expect:3e-48,

Method:Compositional matrix adjust.,

Identities:89/130(68%), Positives:102/130(78%), Gaps:8/130(6%)

|       |     |                                                               |     |
|-------|-----|---------------------------------------------------------------|-----|
| Query | 1   | QLRLVQSGGEVRKPGASVKVSCQTSYGYSFTNFAVSWVRQAPGHGLEWMGRISGSNGVADY | 60  |
|       |     | +++LVQSG EV+KPGASVKVSC+ SGY+FT++ +SWVRQAPG GLEWMG IS NG +Y    |     |
| Sbjct | 1   | EVQLVQSGAEVKKPGASVKVSCASGYTFTSYGISWVRQAPGQGLEWMGWISAYNGNTNY   | 60  |
| Query | 61  | AQDFQDRVtmtdtvtstAYMEMRSLTSDDTAIYYCARDRLDYYENSAYFLGHDGFDIW    | 120 |
|       |     | AQ Q RVTMTTDT TSTAYME+RSL SDDTA+YYCARD R GHD FDIW             |     |
| Sbjct | 61  | AQKLQGRVTMTTDTSTSTAYMELRSLRSDDTAVYYCARDTRGR-----GGHDAFDIW     | 112 |
| Query | 121 | GQGTMTVTVLS                                                   | 130 |
|       |     | GQGTMTV+ S                                                    |     |
| Sbjct | 113 | GQGTMTVISS                                                    | 122 |

>anti-SARS-CoV-2 spike protein immunoglobulin heavy chain variable region,  
partial [Homo sapiens]

Sequence ID: QKY76564.1 Length: 128

Range 1: 1 to 128

Score:160 bits(404), Expect:9e-48,

Method:Compositional matrix adjust.,

Identities:89/130(68%), Positives:102/130(78%), Gaps:2/130(1%)

```

Query   1      QLRLVQSGGEVRKPGASVKVSCQTSGYSFTNFAVSWVRQAPGHGLEWMGRISGSNGVADY  60
          Q++LVQSG EV+KPGASVKVSC+ SGY+FT++ +SWVRQAPG GLEWMG IS  NG  +Y
Sbjct   1      QVQLVQSGAEVKKPGASVKVSCASGYTFTSYVISWVRQAPGQGLEWMGWISAYNGNTNY  60

Query   61     AQDFQDRVtmtdtvtstAYMEMRSLTSDDTAIYYCARDRLDYYENSAYFLGHDGFDIW  120
          AQ  Q RVTMTTDT TSTAYME+RSL SDDTA+YYCARD+  YY  S      H G D+W
Sbjct   61     AQKLQGRVTMTTDTSTSTAYMELRSLRSDDTAVYYCARDQGPTYYYGSG--SPHYGMDVW  118

Query   121    GQGTMTVTVLS  130
          GQGT VTV S
Sbjct   119    GQGTTVTVSS  128

```

### Paratome analysis

```

paratome_1_seq_12087_130_bp
ABR H1: YSFTNFAVS (27-35)
ABR H2: WMGRISGSNGVADY (47-60)
ABR H3: RDRRLDYYENSAYFLGHDGFDI (98-119)

```

### BLAST Sequence alignment against SARS-CoV-2

```

ABR H1:
>ORFlab polyprotein [Severe acute respiratory syndrome coronavirus 2]
Sequence ID: UFC29138.1 Length: 7096
Range 1: 2351 to 2356

```

```

Score:19.7 bits(39), Expect:16334,
Method:,
Identities:5/6(83%), Positives:5/6(83%), Gaps:0/6(0%)

```

```

Query    3      FTNFAV  8
          F NFAV
Sbjct   2351  FSNFAV  2356

```

Range 2: 4811 to 4817

```

Score:17.2 bits(33), Expect:139818,
Method:,
Identities:5/7(71%), Positives:6/7(85%), Gaps:0/7(0%)

```

```

Query    3      FTNFAVS  9
          F +FAVS
Sbjct   4811  FYDFAVS  4817

```

ABR H2

```

>surface glycoprotein, partial [Severe acute respiratory syndrome
coronavirus 2]
Sequence ID: QRX29628.1 Length: 682
Range 1: 357 to 365

```

```

Score:24.0 bits(49), Expect:1281,
Method:,
Identities:8/11(73%), Positives:8/11(72%), Gaps:2/11(18%)

```

```

Query    4      RISGSNGVADY  14
          RIS  N VADY
Sbjct   357  RIS--NXVADY  365

```

ABR H3

```

>ORFla polyprotein [Severe acute respiratory syndrome coronavirus 2]
Sequence ID: QWC82475.1 Length: 4405
Range 1: 1893 to 1907

```



Score:26.5 bits(55), Expect:522,  
Method:  
Identities:10/16(63%), Positives:11/16(68%), Gaps:4/16(25%)

|       |      |                  |      |
|-------|------|------------------|------|
| Query | 2    | DRRLD-YY--ENSAYF | 14   |
|       |      | DR LD YY +NS YF  |      |
| Sbjct | 1893 | DRKLDNYYKKDNS-YF | 1907 |

## AOA7T0PXI8

```
>tr|AOA7T0PXI8|AOA7T0PXI8_HUMAN Immunglobulin heavy chain variable region
(Fragment) OS=Homo sapiens OX=9606 PE=2 SV=1
EVQLVESGGGVVVRPGGSLRLSCAASGFSFDDYAMTWVRQAPGKGLEWVSGITYNGGSTGY
ADSVKGRFTISRDNAKNSLYLQMTNLRAGDTAVYFCARDATYCGGDCYLDYWGQGALVTVSS
```

### BLAST Sequence alignment against nr

```
Query: tr|AOA7T0PXI8|AOA7T0PXI8_HUMAN Immunglobulin heavy chain variable
region (Fragment) OS=Homo sapiens OX=9606 PE=2 SV=1 Query ID:
lcl|Query_52619 Length: 122
```

```
>anti-SARS-CoV-2 immunoglobulin heavy chain variable region, partial [Homo
sapiens]
```

```
Sequence ID: QKY76690.1 Length: 125
```

```
Range 1: 1 to 125
```

```
Score:197 bits(502), Expect:8e-63,
Method:Compositional matrix adjust.,
Identities:98/125(78%), Positives:107/125(85%), Gaps:3/125(2%)
```

```
Query 1 EVQLVESGGGVVVRPGGSLRLSCAASGFSFDDYAMTWVRQAPGKGLEWVSGITYNGGSTGY 60
EVQLVESGGGVV+PG SLRLSCAASGF+FDDYAM WVRQAPGKGLEWVSGI++N GS GY
Sbjct 1 EVQLVESGGGLVQPGSLRLSCAASGFTFDDYAMHWVRQAPGKGLEWVSGISWNSGSIGY 60

Query 61 ADSVKGRFTISRDNAKNSLYLQMTNLRAGDTAVYFCARDATYCGG---DCYLDYWGQGAL 117
ADSVKGRFTISRDNAKNSLYLQM +LRA DT +Y+CA+D Y G Y DYWGQG L
Sbjct 61 ADSVKGRFTISRDNAKNSLYLQMNSLRAEDTGLYYCAKDINYDSGGYHKNYFDYWGQGTL 120

Query 118 VTVSS 122
VTVSS
Sbjct 121 VTVSS 125
```

### Paratome analysis

```
paratome_1_seq_6561_122_bp
ABR H1: FSFDDYAMT (27-35)
ABR H2: WVSGITYNGGSTGY (47-60)
ABR H3: RDATYCGGDCYLDY (98-111)
```

### BLAST Sequence alignment against SARS-CoV-2

```
ABR H1: FSFDDYAMT (27-35)
>ORFlab polyprotein [Severe acute respiratory syndrome coronavirus 2]
Sequence ID: QYV18445.1 Length: 7096
Range 1: 1087 to 1090
```

```
Score:18.0 bits(35), Expect:68513,
Method:,
Identities:4/4(100%), Positives:4/4(100%), Gaps:0/4(0%)
```

```
Query 3 FDDY 6
FDDY
Sbjct 1087 FDDY 1090
```

```
ABR H2: WVSGITYNGGSTGY (47-60)
>ORFlab polyprotein [Severe acute respiratory syndrome coronavirus 2]
Sequence ID: UKT45678.1 Length: 7093
Range 1: 4731 to 4735
```

```
Score:18.0 bits(35), Expect:179260,
Method:,
Identities:5/5(100%), Positives:5/5(100%), Gaps:0/5(0%)
```

Query 10 GSTGY 14  
GSTGY  
Sbjct 4731 GSTGY 4735

ABR H3: RDATEYCGGDCYLDY (98-111)  
>ORF1a polyprotein, partial [Severe acute respiratory syndrome coronavirus  
2]  
Sequence ID: QRX11300.1 Length: 3727  
Range 1: 187 to 196

Score:21.0 bits(42), Expect:15118,  
Method:  
Identities:6/10(60%), Positives:7/10(70%), Gaps:0/10(0%)  
Query 2 DATEYCGGDCY 11  
D +CG DCY  
Sbjct 187 DNNFCGPDCY 196

## A0A5C2G586

```
>tr|A0A5C2G586|A0A5C2G586_HUMAN IGH c149_heavy__IGHV3-20_IGHD3-10_IGHJ6
(Fragment) OS=Homo sapiens OX=9606 PE=2 SV=1
EVQLVESGGSVVRPGGSLRLSCAASGFTFDDYAMTWVRQAPGKGLEWVCGINWNGGSTGY
ADSVKGRFTISRDNAKNSLYLQMNSLRADDTALYYCARNGALYYPGSEWPTLPLKYYYGMDVWGQGTTVTVSS
```

### BLAST Sequence alignment against nr

```
Query: tr|A0A5C2G586|A0A5C2G586_HUMAN IGH c149_heavy__IGHV3-20_IGHD3-
10_IGHJ6 (Fragment) OS=Homo sapiens OX=9606 PE=2 SV=1 Query ID:
lcl|Query_19769 Length: 133
```

```
>anti-SARS-CoV-2 spike protein immunoglobulin heavy chain variable region,
partial [Homo sapiens]
Sequence ID: QKY76519.1 Length: 129
>anti-SARS-CoV-2 spike protein immunoglobulin heavy chain variable region,
partial [Homo sapiens]
Sequence ID: QKY76525.1 Length: 129
>anti-SARS-CoV-2 spike protein immunoglobulin heavy chain variable region,
partial [Homo sapiens]
Sequence ID: QKY76528.1 Length: 129
Range 1: 1 to 129
```

```
Score:209 bits(531), Expect:4e-67,
Method:Compositional matrix adjust.,
Identities:109/133(82%), Positives:114/133(85%), Gaps:4/133(3%)
```

```
Query 1 EVQLVESGGSVVRPGGSLRLSCAASGFTFDDYAMTWVRQAPGKGLEWVCGINWNGGSTGY 60
Sbjct 1 EVQLVESGGSVVRPGGSLRLSCAASGFTFDDY M+WVRQAPGKGLEWV INWNGGSTGY 60

Query 61 ADSVKGRFTISRDNAKNSLYLQMNSLRADDTALYYCARNGALYYPGSEWPTLPLKYYYGM 120
Sbjct 61 ADSVKGRFTISRDNAKNSLYLQMNSLRA+DTALY+CAR + S W YYY M 116

Query 121 DVWGQGTTVTVSS 133
Sbjct 117 DVWGKGTTVTVSS 129
```

### Paratome analysis

```
paratome_1_seq_6688_133_bp
ABR H1: FTFDDYAMT (27-35)
ABR H2: WVCINWNGGSTGY (47-60)
ABR H3: RYGALYYPGSEWPTLPLKYYYGMDV (98-122)
```

### BLAST Sequence alignment against SARS-CoV-2

```
ABR H1: FTFDDYAMT (27-35)
>ORF1ab polyprotein [Severe acute respiratory syndrome coronavirus 2]
Sequence ID: QYV18445.1 Length: 7096
Range 1: 1087 to 1090
```

```
Score:18.0 bits(35), Expect:68513,
Method:,
Identities:4/4(100%), Positives:4/4(100%), Gaps:0/4(0%)
```

```
Query 3 FDDY 6
Sbjct 1087 FDDY 1090
```

```
>ORF3a protein [Severe acute respiratory syndrome coronavirus 2]
Sequence ID: QZU11999.1 Length: 275
```

Range 1: 207 to 212

Score:18.5 bits(36), Expect:48026,  
Method:,  
Identities:5/6(83%), Positives:5/6(83%), Gaps:0/6(0%)

Query 1 FTFDDY 6  
FT DDY  
Sbjct 207 FTSDDY 212

ABR H2: WVCGINWNGGSTGY (47-60)  
>ORFlab polyprotein [Severe acute respiratory syndrome coronavirus 2]  
Sequence ID: UHE81962.1 Length: 7096  
Range 1: 4402 to 4406

Score:19.3 bits(38), Expect:62036,  
Method:,  
Identities:4/5(80%), Positives:5/5(100%), Gaps:0/5(0%)

Query 1 WVCGI 5  
WVCG+  
Sbjct 4402 WVCGV 4406

>membrane glycoprotein [Severe acute respiratory syndrome coronavirus 2]  
Sequence ID: UKO22082.1 Length: 222  
Range 1: 73 to 79

Score:19.7 bits(39), Expect:43115,  
Method:,  
Identities:6/7(86%), Positives:6/7(85%), Gaps:1/7(14%)

Query 5 INWN-GG 10  
INWN GG  
Sbjct 73 INWNTGG 79

ABR H3: RNGALYYPGSEWPTLPLKYYYGMDV (98-122)  
>ORFlab polyprotein [Severe acute respiratory syndrome coronavirus 2]  
Sequence ID: QKM77286.1 Length: 7096  
Range 1: 5620 to 5634

Score:23.1 bits(47), Expect:10988,  
Method:,  
Identities:9/21(43%), Positives:9/21(42%), Gaps:9/21(42%)

Query 4 ALYYPGSEWPTLPLK---YYY 21  
ALYYP K YYY  
Sbjct 5620 ALYYP-----XXKEYXYYY 5634

## AOA7S5EUT4

```
>tr|AOA7S5EUT4|AOA7S5EUT4_HUMAN IGH c1335_heavy_IGHV3-11_IGHD4-23_IGHJ4
(Fragment) OS=Homo sapiens OX=9606 PE=2 SV=1
QVQLVESGGGLVKPGGSLRLSCAASGLTFSDYFMSWVRQAPGKGLEWLSYINNRGGHIYY
ADSVKGRFTISRDNQNSLYLQMNSLRAEDTAVYYCASVPTFDGNFRRPLYFYFDSWGQGT
LVTVSS
```

### BLAST Sequence alignment against nr

```
Query: tr|AOA7S5EUT4|AOA7S5EUT4_HUMAN IGH c1335_heavy_IGHV3-11_IGHD4-
23_IGHJ4 (Fragment) OS=Homo sapiens OX=9606 PE=2 SV=1 Query ID:
lcl|Query_51035 Length: 126
```

```
>anti-SARS-CoV-2 spike protein immunoglobulin heavy chain variable region,
partial [Homo sapiens]
Sequence ID: QKY76453.1 Length: 120
Range 1: 1 to 120
```

```
Score:202 bits(513), Expect:1e-64,
Method:Compositional matrix adjust.,
Identities:101/126(80%), Positives:107/126(84%), Gaps:6/126(4%)
```

```
Query 1 QVQLVESGGGLVKPGGSLRLSCAASGLTFSDYFMSWVRQAPGKGLEWLSYINNRGGHIYY 60
      QVQLVESGGGLVKPGGSLRLSCAASG TFSDY+MSW+RQAPGKGLEW+SYI++ G IYY
Sbjct 1 QVQLVESGGGLVKPGGSLRLSCAASGTFSDYYMSWIRQAPGKGLEWVSIISSSGITIYY 60

Query 61 ADSVKGRFTISRDNQNSLYLQMNSLRAEDTAVYYCASVPTFDGNFRRPLYFYFDSWGQGT 120
      ADSVKGRFTISRDNQNSLYLQMNSLRAEDTAVYYC V P YF WGQGT
Sbjct 61 ADSVKGRFTISRDNQNSLYLQMNSLRAEDTAVYYCTGV-----VAAPAEYFQHWGQGT 114

Query 121 LVTVSS 126
      LVTVSS
Sbjct 115 LVTVSS 120
```

```
>anti SARS-CoV-2 immunoglobulin heavy chain, partial [Homo sapiens]
Sequence ID: QNT09657.1 Length: 129
Range 1: 1 to 129
```

```
Score:201 bits(512), Expect:3e-64,
Method:Compositional matrix adjust.,
Identities:102/129(79%), Positives:111/129(86%), Gaps:3/129(2%)
```

```
Query 1 QVQLVESGGGLVKPGGSLRLSCAASGLTFSDYFMSWVRQAPGKGLEWLSYINNRGGHIYY 60
      QVQLVESGGGLVKPGGSLRLSCAASG TFSDY+M+W+RQAPGKGLEW+SYI++ G IYY
Sbjct 1 QVQLVESGGGLVKPGGSLRLSCAASGTFSDYYMTWIRQAPGKGLEWVSIISSSGSTIYY 60

Query 61 ADSVKGRFTISRDNQNSLYLQMNSLRAEDTAVYYCASVPTFDGNFR---RPLYFYFDSWG 117
      ADSVKGRFTISRDNQNSLYLQMNSLRAEDTAVYYCA G +R R +FD WG
Sbjct 61 ADSVKGRFTISRDNQNSLYLQMNSLRAEDTAVYYCARARGSSGWYRIGTRWGNWFDWPWG 120

Query 118 QGTLVTVSS 126
      QGTLVTVSS
Sbjct 121 QGTLVTVSS 129
```

### Paratome analysis

```
paratome_1_seq_22986_126_bp
ABR H1: LTFSDYFMS (27-35)
ABR H2: WLSYINNRGGHIYYA (47-61)
ABR H3: ASVPTFDGNFRRPLYFYFDS (97-115)
```

### BLAST Sequence alignment against SARS-CoV-2

```
ABR H1: LTFSDYFMS (27-35)
```

>ORFlab polyprotein [Severe acute respiratory syndrome coronavirus 2]  
Sequence ID: UHX88987.1 Length: 7096  
Range 1: 5547 to 5550

Score:19.3 bits(38), Expect:23321,  
Method:,  
Identities:4/4(100%), Positives:4/4(100%), Gaps:0/4(0%)

Query 5 DYFM 8  
DYFM  
Sbjct 5547 DYFM 5550

Range 2: 4468 to 4472

Score:17.6 bits(34), Expect:97565,  
Method:,  
Identities:4/5(80%), Positives:5/5(100%), Gaps:0/5(0%)

Query 2 TFSDY 6  
TFS+Y  
Sbjct 4468 TFSNY 4472

ABR H2: WLSYINNRGGHIYYA (47-61)

Query: unnamed protein product Query ID: lc1|Query\_15311 Length: 15

>ORFla polyprotein, partial [Severe acute respiratory syndrome coronavirus 2]  
Sequence ID: UCW21460.1 Length: 4288  
Range 1: 15 to 19

Score:19.7 bits(39), Expect:50869,  
Method:,  
Identities:5/5(100%), Positives:5/5(100%), Gaps:0/5(0%)

Query 9 GGHIY 13  
GGHIY  
Sbjct 15 GGHIY 19

>nucleocapsid phosphoprotein, partial [Severe acute respiratory syndrome coronavirus 2]  
Sequence ID: UDJ53547.1 Length: 266  
Range 1: 177 to 181

Score:19.3 bits(38), Expect:71485,  
Method:,  
Identities:4/5(80%), Positives:4/5(80%), Gaps:0/5(0%)

Query 1 WLSYI 5  
WL YI  
Sbjct 177 WLT YI 181

ABR H3: ASVPTFDGNFRRPLYFDS (97-115)

Query: unnamed protein product Query ID: lc1|Query\_52520 Length: 19

>ORFlab polyprotein [Severe acute respiratory syndrome coronavirus 2]  
Sequence ID: UJR43981.1 Length: 7092  
Range 1: 5169 to 5176

Score:21.4 bits(43), Expect:22123,

Method:  
Identities:6/8(75%), Positives:6/8(75%), Gaps:0/8(0%)

Query 9 NFRRLPLY 16  
NFR LYY  
Sbjct 5169 NFRSVLXY 5176

>surface glycoprotein [Severe acute respiratory syndrome coronavirus 2]  
Sequence ID: UBE13906.1 Length: 1273  
Range 1: 26 to 38

Score:19.3 bits(38), Expect:123128,  
Method:  
Identities:6/13(46%), Positives:7/13(53%), Gaps:0/13(0%)

Query 4 PTFDGNFRRLPLY 16  
P + FRR YY  
Sbjct 26 PAYTNSFRRGVYY 38



## A0A5C2FU04

```
>tr|A0A5C2FU04|A0A5C2FU04_HUMAN IGL c441_light_IGKV3D-15_IGKJ1 (Fragment)
OS=Homo sapiens OX=9606 PE=2 SV=1
EILMTQSPATLSVSPGERVTLSQWASQSISSYLAWYQQKPGQAPRLLFYGASTRATGIPA
RFSASGSGTEFTLTISSLQSEDFAVYYCQQYNNWPRAFGQGTVEIK
```

### BLAST Sequence alignment against nr

```
Query: tr|A0A5C2FU04|A0A5C2FU04_HUMAN IGL c441_light_IGKV3D-15_IGKJ1
(Fragment) OS=Homo sapiens OX=9606 PE=2 SV=1 Query ID: lcl|Query_4889
Length: 107
```

```
>anti-SARS-CoV-2 spike protein immunoglobulin light chain variable region,
partial [Homo sapiens]
Sequence ID: QKY76193.1 Length: 107
>anti-SARS-CoV-2 spike protein immunoglobulin light chain variable region,
partial [Homo sapiens]
Sequence ID: QKY76252.1 Length: 107
Range 1: 1 to 107
```

```
Score:197 bits(501), Expect:3e-63,
Method:Compositional matrix adjust.,
Identities:97/107(91%), Positives:99/107(92%), Gaps:0/107(0%)
```

```
Query 1 EILMTQSPATLSVSPGERVTLSQWASQSISSYLAWYQQKPGQAPRLLFYGASTRATGIPA 60
        EI+MTQSPATLSVSPGER TLSC ASQS+SS LAWYQQKPGQAPRLL YGASTRATGIPA
Sbjct 1 EIVMTQSPATLSVSPGERATLSCRASQSVSSNLAWYQQKPGQAPRLLIYGASTRATGIPA 60

Query 61 RFSASGSGTEFTLTISSLQSEDFAVYYCQQYNNWPRAFGQGTVEIK 107
        RFS SGSGTEFTLTISSLQSEDFAVYYCQQYNNWP FGQGT VEIK
Sbjct 61 RFSGSGSGTEFTLTISSLQSEDFAVYYCQQYNNWPGTFGQGTKVEIK 107
```

### Paratome analysis

```
paratome_1_seq_6875_107_bp
ABR L1: QSISSYLA (27-34)
ABR L2: LLFYGASTRAT (46-56)
ABR L3: QQYNNWPRA (89-97)
```

### BLAST Sequence alignment against SARS-CoV-2

```
ABR L1: QSISSYLA (27-34)
>ORFlab polyprotein [Severe acute respiratory syndrome coronavirus 2]
Sequence ID: UFC70978.1 Length: 7091
Range 1: 1021 to 1027
```

```
Score:18.9 bits(37), Expect:26492,
Method:,
Identities:5/7(71%), Positives:5/7(71%), Gaps:0/7(0%)
```

```
Query 1 QSISSYL 7
        Q IS YL
Sbjct 1021 QTISGYL 1027
```

```
>surface glycoprotein [Severe acute respiratory syndrome coronavirus 2]
Sequence ID: QZI78246.1 Length: 1271
Range 1: 688 to 693
```

```
Score:19.3 bits(38), Expect:18584,
Method:,
Identities:5/6(83%), Positives:5/6(83%), Gaps:0/6(0%)
```

Query 1 QSISSY 6  
QSI Y  
Sbjct 688 QSISAY 693

ABR L2: LLFYGASTRAT (46-56)  
>ORF1ab polyprotein [Severe acute respiratory syndrome coronavirus 2]  
Sequence ID: QS013661.1 Length: 7096  
Range 1: 4763 to 4768

Score:18.9 bits(37), Expect:51342,  
Method:,  
Identities:5/6(83%), Positives:5/6(83%), Gaps:0/6(0%)

Query 1 LLFYGA 6  
LLFY A  
Sbjct 4763 LLFYAA 4768

ABR L3: QQYNNWPRA (89-97)

>surface glycoprotein [Severe acute respiratory syndrome coronavirus 2]  
Sequence ID: UFD05785.1 Length: 1271  
Range 1: 1205 to 1211

Score:21.4 bits(43), Expect:3979,  
Method:,  
Identities:5/7(71%), Positives:6/7(85%), Gaps:0/7(0%)

Query 1 QQYNNWP 7  
+QY NWP  
Sbjct 1205 EQYINWP 1211

## A0A5C2GH36

```
>tr|A0A5C2GH36|A0A5C2GH36_HUMAN IG c401_light_IGKV3-20_IGKJ4 (Fragment)
OS=Homo sapiens OX=9606 PE=2 SV=1
EIVLMQSPGTLSPGERATLSCRPSQSVSSNHLAWYQQKPGQAPRLLIYGASVRATGIP
DRFSGSGSGTDFTLTISRLEPEDFAVYYCHQYGRSPTFGGGTRVEIK
```

### BLAST Sequence alignment against nr

```
Query: tr|A0A5C2GH36|A0A5C2GH36_HUMAN IG c401_light_IGKV3-20_IGKJ4
(Fragment) OS=Homo sapiens OX=9606 PE=2 SV=1 Query ID: lcl|Query_18782
Length: 107
```

```
>anti-SARS-CoV-2 spike protein immunoglobulin light chain variable region,
partial [Homo sapiens]
Sequence ID: QKY76187.1 Length: 108
>anti-SARS-CoV-2 spike protein immunoglobulin light chain variable region,
partial [Homo sapiens]
Sequence ID: QKY76198.1 Length: 108
Range 1: 1 to 108
```

```
Score:198 bits(503), Expect:1e-63,
Method:Compositional matrix adjust.,
Identities:100/108(93%), Positives:101/108(93%), Gaps:1/108(0%)
```

```
Query 1 EIVLMQSPGTLSPGERATLSCRPSQSVSSNHLAWYQQKPGQAPRLLIYGASVRATGIP 60
        EIVL QSPGTLSPGERATLSCR S QSVSSN LAWYQQKPGQAPRLLIYGAS RATGIP
Sbjct 1 EIVLTQSPGTLSPGERATLSCRASQSVSSNFLAWYQQKPGQAPRLLIYGASSRATGIP 60

Query 61 DRFSGSGSGTDFTLTISRLEPEDFAVYYCHQYGRSP-TFGGGTRVEIK 107
        DRFSGSGSGTDFTLTISRLEPEDFAVYYC QYGRSP TFG GTR+EIK
Sbjct 61 DRFSGSGSGTDFTLTISRLEPEDFAVYYCQQYGRSPITFGQGRLEIK 108
```

### Paratome analysis

```
paratome_1_seq_6953_107_bp
ABR L1: QSVSSNHLA (27-35)
ABR L2: LLIYGASVRAT (47-57)
ABR L3: HQYGRSP (90-96)
```

### BLAST Sequence alignment against SARS-CoV-2

```
ABR L1: QSVSSNHLA (27-35)
>ORFlab polyprotein [Severe acute respiratory syndrome coronavirus 2]
Sequence ID: QNN88284.1 Length: 7096
Range 1: 3739 to 3744
```

```
Score:18.5 bits(36), Expect:47890,
Method:,
Identities:5/6(83%), Positives:5/6(83%), Gaps:0/6(0%)
```

```
Query 2 SVSSNH 7
        SV SNH
Sbjct 3739 SVTSNH 3744
```

```
ABR L2: LLIYGASVRAT (47-57)
>surface glycoprotein [Severe acute respiratory syndrome coronavirus 2]
Sequence ID: UDB79764.1 Length: 1273
Range 1: 1012 to 1020
```

```
Score:17.6 bits(34), Expect:150151,
Method:,
Identities:5/9(56%), Positives:6/9(66%), Gaps:0/9(0%)
```

Query 2 LIYGASVRA 10  
LI A +RA  
Sbjct 1012 LIXXAXIRA 1020

ABR L3: HQYGRSP (90-96)

>ORFlab polyprotein [Severe acute respiratory syndrome coronavirus 2]

Sequence ID: UGC79169.1 Length: 7108

Range 1: 96 to 100

Score:19.3 bits(38), Expect:14481,

Method:

Identities:5/5(100%), Positives:5/5(100%), Gaps:0/5(0%)

Query 2 QYGRS 6  
QYGRS  
Sbjct 96 QYGRS 100

## A0A5C2GPU5

```
>tr|A0A5C2GPU5|A0A5C2GPU5_HUMAN IG c893_heavy_IGHV3-15_IGHD3-16_IGHJ4
(Fragment) OS=Homo sapiens OX=9606 PE=2 SV=1
EVQLVESGGGLVKPGGSLRLSCAASGFSFSNAWMSWVRQAPGKGLEWVGHISKADGGTT
DYAVPVKPIFTISRDDSKNTLYLQLNSLKTEDTAMYICTTG GALSIFYDYWGQGLTVTVSS
```

### BLAST Sequence alignment against nr

```
Query: tr|A0A5C2GPU5|A0A5C2GPU5_HUMAN IG c893_heavy_IGHV3-15_IGHD3-16_IGHJ4
(Fragment) OS=Homo sapiens OX=9606 PE=2 SV=1 Query ID: lcl|Query_90911
Length: 121
```

```
>cross-reactive anti-SARS-CoV-2 immunoglobulin heavy chain variable region,
partial [Homo sapiens]
```

```
Sequence ID: QRG26521.1 Length: 127
```

```
Range 1: 1 to 127
```

```
Score:206 bits(524), Expect:3e-66,
Method:Compositional matrix adjust.,
Identities:105/127(83%), Positives:112/127(88%), Gaps:6/127(4%)
```

```
Query 1 EVQLVESGGGLVKPGGSLRLSCAASGFSFSNAWMSWVRQAPGKGLEWVGHISKADGGTT 60
      +VQLVESGGGLVKPGGSLRLSCAASGF+FSNAWMSWVRQAPGKGLEWVG IKSK DGGTT
Sbjct 1 QVQLVESGGGLVKPGGSLRLSCAASGFTFSNAWMSWVRQAPGKGLEWVGRIKSKTDGGTT 60

Query 61 DYAVPVKPIFTISRDDSKNTLYLQLNSLKTEDTAMYICTT---GGGALSIFY---DYWGQG 114
      DYA PVK FTISRDDSKNTLYLQ+NSLKTEDTA+YYCTT G G+L Y+ D WG+G
Sbjct 61 DYAAPVKGRFTISRDDSKNTLYLQMNSLKTEDTAVYYCTTTEEPGAGSLYYYYYMDVWGKG 120

Query 115 TLVTVSS 121
      T VTVSS
Sbjct 121 TTVTVSS 127
```

```
>anti-SARS-CoV-2 immunoglobulin gamma heavy chain variable region, partial
[Homo sapiens]
```

```
Sequence ID: QJU69707.1 Length: 127
```

```
Range 1: 1 to 127
```

```
Score:213 bits(541), Expect:1e-68,
Method:Compositional matrix adjust.,
Identities:107/127(84%), Positives:111/127(87%), Gaps:6/127(4%)
```

```
Query 1 EVQLVESGGGLVKPGGSLRLSCAASGFSFSNAWMSWVRQAPGKGLEWVGHISKADGGTT 60
      EVQLVESGGGLVKPGGSLRLSCAASGF+FSNAWMSWVRQAPGKGLEWVG IKSK DGGTT
Sbjct 1 EVQLVESGGGLVKPGGSLRLSCAASGFTFSNAWMSWVRQAPGKGLEWVGRIKSKTDGGTT 60

Query 61 DYAVPVKPIFTISRDDSKNTLYLQLNSLKTEDTAMYICTTG-----GALSIFYDYWGQG 114
      DYA PVK FTISRDDSKNTLYLQ+NSLKTEDTA+YYCTT G+ Y DYWGQG
Sbjct 61 DYAAPVKGRFTISRDDSKNTLYLQMNSLKTEDTAVYYCTTDRVYDIWGSYRYLDYWGQG 120

Query 115 TLVTVSS 121
      TLVTVSS
Sbjct 121 TLVTVSS 127
```

### Paratome analysis

```
paratome_1_seq_7036_121_bp
ABR H1: FSFSNAWMS (27-35)
ABR H2: WVGHIKSKADGGTTDY (47-62)
ABR H3: TGGGALSIFYDY (100-110)
```

### BLAST Sequence alignment against SARS-CoV-2

```
ABR H1: FSFSNAWMS (27-35)
```

No significant similarity found.

ABR H2: WVGHIKSKADGGTTDY (47-62)

>ORF1a polyprotein [Severe acute respiratory syndrome coronavirus 2]

Sequence ID: UKR34990.1 Length: 4401

Range 1: 1301 to 1311

Score:19.3 bits(38), Expect:84318,

Method:,

Identities:7/11(64%), Positives:8/11(72%), Gaps:0/11(0%)

Query 5 IKSKADGGTTD 15

I K DGGTT+

Sbjct 1301 IPTKKDGGTTE 1311

ABR H3: TGGGALSYFDY (100-110)

>ORF1ab polyprotein [Severe acute respiratory syndrome coronavirus 2]

Sequence ID: UDG47217.1 Length: 7096

Range 1: 4838 to 4847

Score:21.0 bits(42), Expect:8671,

Method:,

Identities:6/10(60%), Positives:7/10(70%), Gaps:0/10(0%)

Query 2 GGGALSYFDY 11

G A SY+DY

Sbjct 4838 GNAAISYYDY 4847

>ORF3a protein [Severe acute respiratory syndrome coronavirus 2]

Sequence ID: UHP61412.1 Length: 275

Range 1: 204 to 211

Score:19.7 bits(39), Expect:25152,

Method:,

Identities:6/8(75%), Positives:6/8(75%), Gaps:2/8(25%)

Query 6 LSYF--DY 11

LSYF DY

Sbjct 204 LSYFTSDY 211

## A0A5C2H2C4

```
>tr|A0A5C2H2C4|A0A5C2H2C4_HUMAN IG c1116_light_IGKV3-20_IGKJ2 (Fragment)
OS=Homo sapiens OX=9606 PE=2 SV=1
EIVLTQSPGTLSSLPGDRATLSCRASRSVSSAQLTWYQQRPGQAPRLLLYATSTRATGVP
DRFSGSGSGTDFTLTISKVQPEDFAVYFCHQYESSPRTFGQGTKLEIK
```

### BLAST Sequence alignment against nr

```
Query: tr|A0A5C2H2C4|A0A5C2H2C4_HUMAN IG c1116_light_IGKV3-20_IGKJ2
(Fragment) OS=Homo sapiens OX=9606 PE=2 SV=1 Query ID: lcl|Query_10487
Length: 108
```

```
>anti-SARS-CoV-2 spike protein immunoglobulin light chain variable region,
partial [Homo sapiens]
Sequence ID: QKY76271.1 Length: 108
Range 1: 1 to 108
```

```
Score:188 bits(478), Expect:1e-59,
Method:Compositional matrix adjust.,
Identities:89/108(82%), Positives:101/108(93%), Gaps:0/108(0%)
```

```
Query 1 EIVLTQSPGTLSSLPGDRATLSCRASRSVSSAQLTWYQQRPGQAPRLLLYATSTRATGVP 60
      EIVLTQSPGTLSSLPG+RATLSCRAS+SVSS L WYQQ+PGQAPRLL++ S+RATG+P
Sbjct 1 EIVLTQSPGTLSSLPGERATLSCRASQSVSSTFLAWYQQKPGQAPRLLIFGASSRATGIP 60

Query 61 DRFSGSGSGTDFTLTISKVQPEDFAVYFCHQYESSPRTFGQGTKLEIK 108
      DRFSGSGSGTDFTLTIS+++PEDFAVY+CHQY +SP TFGQGTKLEIK
Sbjct 61 DRFSGSGSGTDFTLTISRLEPEDFAVYCHQYGTSPYTFGQGTKLEIK 108
```

### Paratome analysis

```
paratome_1_seq_7482_108_bp
ABR L1: RSVSSAQLT (27-35)
ABR L2: LLLYATSTRAT (47-57)
ABR L3: HQYESSPR (90-97)
```

### BLAST Sequence alignment against SARS-CoV-2

```
ABR L1: RSVSSAQLT (27-35)
>ORFlab polyprotein [Severe acute respiratory syndrome coronavirus 2]
Sequence ID: UBU25355.1 Length: 7096
Range 1: 4404 to 4412
```

```
Score:18.9 bits(37), Expect:33499,
Method:,
Identities:6/9(67%), Positives:6/9(66%), Gaps:0/9(0%)
```

```
Query 1 RSVSSAQLT 9
      R VS A LT
Sbjct 4404 RGVSAARLT 4412
```

```
ABR L2: LLLYATSTRAT (47-57)
```

```
>ORFla polyprotein [Severe acute respiratory syndrome coronavirus 2]
Sequence ID: QO094433.1 Length: 4405
Range 1: 2176 to 2186
```

```
Score:19.7 bits(39), Expect:24963,
Method:,
Identities:6/11(55%), Positives:6/11(54%), Gaps:0/11(0%)
```

Query 1 LLLYATSTRAT 11  
LL T TR T  
Sbjct 2176 LLXXXTXTRST 2186

ABR L3: HQYESSPR (90-97)  
No significant similarity found.



## A0A7S5EWS1

```
>tr|A0A7S5EWS1|A0A7S5EWS1_HUMAN IGH c768_heavy_IGHV3-48_IGHD4-17_IGHJ3
(Fragment) OS=Homo sapiens OX=9606 PE=2 SV=1
EVQLEESGGGLVQPGGSLRLSCEVSGFTFRNYEMNWVRQAPGKGLEWVAYIGSFSSPTHY
AGSVRGRFTISRDNKNSLYLQMNSLRADDTALYYCARTRKSDYGDYSEDEGMDVWGRGT
MVTVSS
```

### BLAST Sequence alignment against nr

```
Query: tr|A0A7S5EWS1|A0A7S5EWS1_HUMAN IGH c768_heavy_IGHV3-48_IGHD4-
17_IGHJ3 (Fragment) OS=Homo sapiens OX=9606 PE=2 SV=1 Query ID:
lcl|Query_71519 Length: 126
```

```
>anti-SARS-CoV-2 spike protein immunoglobulin heavy chain variable region,
partial [Homo sapiens]
Sequence ID: QKY76471.1 Length: 126
>anti-SARS-CoV-2 spike protein immunoglobulin heavy chain variable region,
partial [Homo sapiens]
Sequence ID: QKY76492.1 Length: 126
Range 1: 1 to 126
```

```
Score:192 bits(488), Expect:1e-60,
Method:Compositional matrix adjust.,
Identities:94/126(75%), Positives:104/126(82%), Gaps:0/126(0%)
```

```
Query 1 EVQLEESGGGLVQPGGSLRLSCEVSGFTFRNYEMNWVRQAPGKGLEWVAYIGSFSSPTHY 60
        EVQL ESGGGLVQPGGSLRLSC SGFTF +YEMNWVRQAPGKGLEWV+YI S S +Y
Sbjct 1 EVQLVESGGGLVQPGGSLRLSCAASGFTFSYEMNWVRQAPGKGLEWVS YISSSGSAIYY 60

Query 61 AGSVRGRFTISRDNKNSLYLQMNSLRADDTALYYCARTRKSDYGDYSEDEGMDVWGRGT 120
        A SV+GRFTISRDNKNSLYLQMNSLR +DTA+YYCAR +S Y D+ D WG+GT
Sbjct 61 ADSVKGRFTISRDNKNSLYLQMNSLRVEDTAVYYCAREARSRYFDWLPSYYFDYWGGQT 120

Query 121 MVTVSS 126
        +VTVSS
Sbjct 121 LVTVSS 126
```

### Paratome analysis

```
paratome_1_seq_7559_126_bp
ABR H1: FTFRNYEMN (27-35)
ABR H2: WVAYIGSFSSPTHY (47-60)
ABR H3: RTRKSDYGDYSEDEGMDV (98-115)
```

### BLAST Sequence alignment against SARS-CoV-2

```
ABR H1: FTFRNYEMN (27-35)
```

```
>ORFlab polyprotein [Severe acute respiratory syndrome coronavirus 2]
Sequence ID: UKG54270.1 Length: 7089
Range 1: 4461 to 4467
```

```
Score:21.4 bits(43), Expect:3973,
Method:,
Identities:5/7(71%), Positives:6/7(85%), Gaps:0/7(0%)
```

```
Query 2 TFRNYEM 8
        TF NY+M
Sbjct 4461 TFSNYQM 4467
```

```
ABR H2: WVAYIGSFSSPTHY (47-60)
```

```
>ORFla polyprotein [Severe acute respiratory syndrome coronavirus 2]
```

Sequence ID: QWU48698.1 Length: 4402  
Range 1: 2593 to 2600

Score:22.3 bits(45), Expect:5258,  
Method:,  
Identities:6/8(75%), Positives:7/8(87%), Gaps:0/8(0%)

Query 3 AYIGSFSS 10  
AY+G FSS  
Sbjct 2593 AYVGTFSS 2600

ABR H3: RTRKSDYGDYSEDEGMDV (98-115)

>ORFlab polyprotein, partial [Severe acute respiratory syndrome coronavirus  
2]

Sequence ID: UFZ21166.1 Length: 7070  
Range 1: 5500 to 5505

Score:22.3 bits(45), Expect:9684,  
Method:,  
Identities:6/6(100%), Positives:6/6(100%), Gaps:0/6(0%)

Query 4 KSDYGD 9  
KSDYGD  
Sbjct 5500 KSDYGD 5505

**Part 2.** Analysis of immunoglobulin proteins overrepresented in infected cohorts when compared to PCR- individuals.

### Analytical workflow

1. Select immunoglobulin protein sequences overrepresented with highest PCR+/- Log fold-change relative intensity exclusively in each infected asymptomatic, nonsevere and severe cohorts.
2. Protein BLAST sequence alignment against non-redundant protein database(nr)using compositional matrix adjustment ([https://blast.ncbi.nlm.nih.gov/Blast.cgi?PROGRAM=blastp&PAGE\\_TYPE=BlastSearch&LINK\\_LOC=blasthome](https://blast.ncbi.nlm.nih.gov/Blast.cgi?PROGRAM=blastp&PAGE_TYPE=BlastSearch&LINK_LOC=blasthome)).
3. Identification of immunoglobulin sequences aligned with known function. Criteria: Score > 160 bits, Identity > 60%.
4. Identification of correlates of identified proteins with protective or disease associated capacity.

Input data:

| Protein ID | Severe |
|------------|--------|
| A0A5C2GIT4 | 0.977  |
| A0A5C2GDW3 | 0.795  |
| A0A7S5C115 | 0.731  |

| Protein ID | Nonsevere |
|------------|-----------|
| A0A5C2G7I4 | 0.343     |
| A0A5C2GPZ0 | 0.328     |
| A0A7S5EYL7 | 0.296     |

| Protein ID | Asymptomatic |
|------------|--------------|
| A0A5C2GJF4 | 1.240        |
| A0A5C2FZ03 | 0.793        |
| A0A5C2G410 | 0.730        |

## Severe patients

### A0A5C2GIT4

#### BLAST Sequence alignment against nr

```
>tr|A0A5C2GIT4|A0A5C2GIT4_HUMAN IG c17_heavy_IGHV5-51_IGHD5-12_IGHJ6
(Fragment) OS=Homo sapiens OX=9606 PE=2 SV=1
EVQLVQSGAEMKKPGESLRISCRGSGYTFTKYWIGWVRLMPGRGLEWMGIIFPRDSETRY
SPSFQGGQVTISADKSIRTAYLQWTSLNVSDSATYYCARAKGIEAPGHYYGMDVWGHGTTV
TVSS
```

```
>anti-peanut 2S albumin immunoglobulin heavy chain variable region, partial
[Homo sapiens]
```

```
Sequence ID: QVG74243.1 Length: 124
```

```
Range 1: 1 to 124
```

```
Score:196 bits(497), Expect:4e-62,
Method:Compositional matrix adjust.,
Identities:93/124(75%), Positives:105/124(84%), Gaps:0/124(0%)
```

```
Query 1 EVQLVQSGAEMKKPGESLRISCRGSGYTFTKYWIGWVRLMPGRGLEWMGIIFPRDSETRY 60
Sbjct 1 EVQLVQSGAE+KKPGESL+ISC GSG+ FT YWI WVR MPG+GLEWMG I+P D++T Y 60

Query 61 SPSFQGGQVTISADKSIRTAYLQWTSLNVSDSATYYCARAKGIEAPGHYYGMDVWGHGTTV 120
Sbjct 61 SPSFQGGQVTISADKSI TAYLQW+SL SD+A+YYCAR + +YYGMDVWG GTTV 120

Query 121 TVSS 124
Sbjct 121 TVSS 124
```

**Correlate: Risk of allergy**

### A0A5C2GDW3

```
>tr|A0A5C2GDW3|A0A5C2GDW3_HUMAN IGH + IGL c109_heavy_IGHV3-11_IGHD3-
10_IGHJ4 (Fragment) OS=Homo sapiens OX=9606 PE=2 SV=1
QVQLVESGGGLVKPGGSLRLSCAASGFTFSDDYYMSWVRQAPGKGLEWISYIRNRGNMGYY
ADSVKGRFTISRDNAKNSLYLQMSSLQADDTAVYYCARISGFYSGSEVFDYWGQGTLTIVS
S
```

#### BLAST Sequence alignment against nr

```
>anti-peanut 2S albumin immunoglobulin heavy chain variable region, partial
[Homo sapiens]
```

```
Sequence ID: QVG74146.1 Length: 122
```

```
Range 1: 1 to 122
```

```
Score:202 bits(514), Expect:1e-64,
Method:Compositional matrix adjust.,
Identities:101/122(83%), Positives:110/122(90%), Gaps:1/122(0%)
```

```
Query 1 QVQLVESGGGLVKPGGSLRLSCAASGFTFSDDYYMSWVRQAPGKGLEWISYIRNRGNMGYY 60
Sbjct 1 QVQLVESGGGLVKPGGSLRLSCAASGFTFSDDYYMSW+RQAPGKGLEW+SYI + G+ +YY 60

Query 61 ADSVKGRFTISRDNAKNSLYLQMSSLQADDTAVYYCAR-ISGFYSGSEVFDYWGQGTLTIV 119
Sbjct 61 ADSVKGRFTISRDNAKNSLYLQM+SL+A+DTAVYYCAR G FDYWGQGTL+TV 120
```

```
Query 120 SS 121
      SS
Sbjct 121 SS 122
```

**Correlate: Risk of allergy**

### A0A7S5C115

```
>tr|A0A7S5C115|A0A7S5C115_HUMAN IGH c1867_heavy_IGHV3-49_IGHD2-2_IGHJ6
(Fragment) OS=Homo sapiens OX=9606 PE=2 SV=1
EVQLVESGGGLVQPGRSLRLSCTGSGFTFGDFAMSWVRQAPGKGLEWVSLIRSNAYGGTT
EHAASVKGRFTISRDNKSIAYLQMDSLQTEDTAVYYCTRGLPAIIGYYMDVWAKGTTVT
VSS
```

#### BLAST Sequence alignment against nr

```
>anti-GPIIb/IIIa immunoglobulin heavy chain variable region, partial [Homo
sapiens]
Sequence ID: AAK77548.1 Length: 122
Range 1: 1 to 122
```

```
Score:206 bits(525), Expect:2e-66,
Method:Compositional matrix adjust.,
Identities:102/122(84%), Positives:108/122(88%), Gaps:0/122(0%)
```

```
Query 1 EVQLVESGGGLVQPGRSLRLSCTGSGFTFGDFAMSWVRQAPGKGLEWVSLIRSNAYGGTT 60
        EVQLVESGGGLVQPGRSLRLSCT SGFTFGD+AMSWVRQAPGKGLEWV IRS AYGGTT
Sbjct 1 EVQLVESGGGLVQPGRSLRLSCTASGFTFGDYAMSWVRQAPGKGLEWVGFIIRSKAYGGTT 60

Query 61 EHAASVKGRFTISRDNKSIAYLQMDSLQTEDTAVYYCTRGLPAIIGYYMDVWAKGTTVT 120
        E+AASVKGRFTISR+SKSIAYLQM+SL+TEDTAVYYCT P Y MDVW +GT VT
Sbjct 61 EYAASVKGRFTISRDDSKSIAYLQMNLSLKTEDTAVYYCTVRSPGYYYYGMDVWGQGLT 120

Query 121 VS 122
        VS
Sbjct 121 VS 122
```

**Correlate: Chronic idiopathic thrombocytopenic purpura (ITP) caused by an antibody reactive with platelet-associated antigens**

```
>anti-GPIIb/IIIa immunoglobulin heavy chain variable region, partial [Homo
sapiens]
Sequence ID: AAK77548.1 Length: 122
Range 1: 1 to 122
```

```
Score:206 bits(525), Expect:2e-66,
Method:Compositional matrix adjust.,
Identities:102/122(84%), Positives:108/122(88%), Gaps:0/122(0%)
```

```
Query 1 EVQLVESGGGLVQPGRSLRLSCTGSGFTFGDFAMSWVRQAPGKGLEWVSLIRSNAYGGTT 60
        EVQLVESGGGLVQPGRSLRLSCT SGFTFGD+AMSWVRQAPGKGLEWV IRS AYGGTT
Sbjct 1 EVQLVESGGGLVQPGRSLRLSCTASGFTFGDYAMSWVRQAPGKGLEWVGFIIRSKAYGGTT 60

Query 61 EHAASVKGRFTISRDNKSIAYLQMDSLQTEDTAVYYCTRGLPAIIGYYMDVWAKGTTVT 120
        E+AASVKGRFTISR+SKSIAYLQM+SL+TEDTAVYYCT P Y MDVW +GT VT
Sbjct 61 EYAASVKGRFTISRDDSKSIAYLQMNLSLKTEDTAVYYCTVRSPGYYYYGMDVWGQGLT 120

Query 121 VS 122
        VS
Sbjct 121 VS 122
```

**Correlate: Autoantibodies anti-platelet GPIIb/IIIa**

## Nonsevere patients

### A0A5C2G7I4

```
>tr|A0A5C2G7I4|A0A5C2G7I4_HUMAN IGH c572_heavy__IGHV3-21_IGHD5-18_IGHJ5
(Fragment) OS=Homo sapiens OX=9606 PE=2 SV=1
EVQLVESGGGLVKPGGSLKLSCAASGFPFSAYTMTWVRQAPGKGLEWVSIISGSDSYISY
VDSVKGRFTISRDNANNALYLQMNSLRAEDTAVYYCARVEGLDPIDRWGQGTPVTVSS
```

#### BLAST Sequence alignment against nr

```
>myosin-reactive immunoglobulin heavy chain variable region, partial [Homo sapiens]
```

```
Sequence ID: AAD56259.1 Length: 118
```

```
Range 1: 1 to 117
```

```
Score:171 bits(432), Expect:3e-52,
Method:Compositional matrix adjust.,
Identities:92/117(79%), Positives:100/117(85%), Gaps:0/117(0%)
```

```
Query 1 EVQLVESGGGLVKPGGSLKLSCAASGFPFSAYTMTWVRQAPGKGLEWvsiiisgdsyisy 60
EVQLVESGGGLV+PGGSL+LSCAASGF FS+Y+M WVRQAPGKGLEWVS IS + I Y
Sbjct 1 EVQLVESGGGLVQPGGSLRLSCAASGFTFSSYSMNWVRQAPGKGLEWVSYSISSTIITIYY 60

Query 61 vdsvkGRFTISRDNANNALYLQMNSLRAEDTAVYYCARVEGLDPIDRWGQGTPVTVSS 117
DSVKGRFTISRDN N+LYLQMNSLRAEDTAVYYCAR + + D WGQGT VTVS
Sbjct 61 ADSVKGRFTISRDNAKNSLYLQMNSLRAEDTAVYYCARGDSSEAFDIWGQGTMTVTVS 117
```

```
>anti-SARS-CoV-2 immunoglobulin gamma heavy chain, partial [Homo sapiens]
```

```
Sequence ID: QUX33738.1 Length: 116
```

```
Range 1: 1 to 116
```

```
Score:169 bits(428), Expect:8e-52,
Method:Compositional matrix adjust.,
Identities:93/118(79%), Positives:102/118(86%), Gaps:2/118(1%)
```

```
Query 1 EVQLVESGGGLVKPGGSLKLSCAASGFPFSAYTMTWVRQAPGKGLEWvsiiisgdsyisy 60
EVQL+ESGGGLV+PGGSL+LSCAASGF FS+YTM WVRQAPGKGLEWVS I+ S I Y
Sbjct 1 EVQLLESGGGLVQPGGSLRLSCAASGFTFSSYTMNWVRQAPGKGLEWVSYITSDSSTIYY 60

Query 61 vdsvkGRFTISRDNANNALYLQMNSLRAEDTAVYYCARVEGLDPIDRWGQGTPVTVSS 118
DSVKGRFTISRDN N+LYLQMNSLRAEDTAVYYCAR + +D D WG+GT VTVSS
Sbjct 61 ADSVKGRFTISRDNAKNSLYLQMNSLRAEDTAVYYCARNKAMD--DYWGRGTLVTVSS 116
```

**Correlate: Protective capacity against SARS-CoV-2 and autoantibodies-mediated risk of myasthenia gravis**

### A0A5C2GPZ0

```
>tr|A0A5C2GPZ0|A0A5C2GPZ0_HUMAN IG c650_heavy_IGHV3-23_IGHD4-11_IGHJ4
(Fragment) OS=Homo sapiens OX=9606 PE=2 SV=1
EVQLLDSGGGSVQPGGSLRLSCAASGFYFSNYAMNWVRQAPGKGLQWVARISGTGGDTFY
ADSVKGRFTISRDN SKNILSLQMDSLRDEDTAVYFCAKDRLSSPKVSEAYFDYWGPGLTV
TVSS
```

#### BLAST Sequence alignment against nr

```
>anti-SARS-CoV-2 immunoglobulin gamma heavy chain, partial [Homo sapiens]
```

```
Sequence ID: QUX33727.1 Length: 121
```

```
Range 1: 1 to 121
```

```
Score:199 bits(506), Expect:2e-63,
```

Method:Compositional matrix adjust.,

Identities:100/124(81%), Positives:109/124(87%), Gaps:3/124(2%)

```
Query 1 EVQLLDSEGGGSVQPGGSLRLSCAASGFFYSNYAMNWVRQAPGKGLQWVARISGTGGDTFY 60
Sbjct 1 EVQLL+SGGG VQPGGSLRLSCAASGF FS+YAM+WVRQAPGKGL+WV+ ISG+GG T+Y 60

Query 61 ADSVKGRFTISRDN SKNILSLQMDSLRDEDTAVYFCAKDR LSSPKVSEAYFDYWGP GTLV 120
Sbjct 61 ADSVKGRFTISRDN SKN L LQM+SLR EDTAVY+CAKDR SS YFDYWG GTLV 117

Query 121 TVSS 124
Sbjct 118 TVSS 121
```

>anti-peanut 2S albumin immunoglobulin heavy chain variable region, partial  
[Homo sapiens]

Sequence ID: QVG74500.1 Length: 122

Range 1: 1 to 122

Score:197 bits(502), Expect:7e-63,

Method:Compositional matrix adjust.,

Identities:100/124(81%), Positives:110/124(88%), Gaps:2/124(1%)

```
Query 1 EVQLLDSEGGGSVQPGGSLRLSCAASGFFYSNYAMNWVRQAPGKGLQWVARISGTGGDTFY 60
Sbjct 1 EVQLL+SGGG VQPGGSLRLSCAASGF FS+YAM+WVRQAPGKGL+WV+ ISG+GG T+Y 60

Query 61 ADSVKGRFTISRDN SKNILSLQMDSLRDEDTAVYFCAKDR LSSPKVSEAYFDYWGP GTLV 120
Sbjct 61 ADSVKGRFTISRDN SKN L LQM+SLR EDTAVY+CAKDR SS +S FDYWG GTLV 118

Query 121 TVSS 124
Sbjct 119 TVSS 122
```

>anti-hepatitis B surface antigen immunoglobulin heavy chain variable  
region, partial [Homo sapiens]

Sequence ID: AAL57837.1 Length: 121

Range 1: 1 to 121

Score:196 bits(499), Expect:2e-62,

Method:Compositional matrix adjust.,

Identities:96/124(77%), Positives:109/124(87%), Gaps:3/124(2%)

```
Query 1 EVQLLDSEGGGSVQPGGSLRLSCAASGFFYSNYAMNWVRQAPGKGLQWVARISGTGGDTFY 60
Sbjct 1 EVQL++SGGG VQPGGSLRLSCAASGF FS+YAM+WVRQAPGKGL+WV+ IS GG T+Y 60

Query 61 ADSVKGRFTISRDN SKNILSLQMDSLRDEDTAVYFCAKDR LSSPKVSEAYFDYWGP GTLV 120
Sbjct 61 ADSVKGRFTISRDN SKN L LQM+SLR EDTAVY+CAKDR +++ A+FDYWG GTLV 117

Query 121 TVSS 124
Sbjct 118 TVSS 121
```

>Diabody 305 complex with EpoR [Homo sapiens]

Sequence ID: 4Y5X\_J Length: 136

Range 1: 8 to 131

Score:195 bits(496), Expect:9e-62,

Method:Compositional matrix adjust.,

Identities:95/124(77%), Positives:106/124(85%), Gaps:0/124(0%)

```
Query 1 EVQLLDSEGGGSVQPGGSLRLSCAASGFFYSNYAMNWVRQAPGKGLQWVARISGTGGDTFY 60
Sbjct 1 EVQLL+SGGG VQPGGSLRLSCAASGF FS+YAM+WVRQAPGKGL+WV+ ISG+GG T+Y
```

```

Sbjct  8      EVQLLESGGGLVQPGGSLRLSCAASGFTTFSSYAMSWVRQAPGKGLEWVSAISGSGGSTYY  67
Query  61      ADSVKGRFTISRDN SKNILSLQMDSLRDEDTAVYFCAKDR LSSPKVSEAYFDYWGPGTLV  120
          ADSVKGRFTISRDN SKN L LQM+SLR EDTAVY+C KDR++          YFD WG GT V
Sbjct  68      ADSVKGRFTISRDN SKNTLYLQMNSLRAEDTAVYYCVKDRVAVAGKGSYYFDSWGRGTTV  127
Query  121     TVSS      124
          TVSS
Sbjct  128     TVSS      131

```

**Correlate: Protective capacity against SARS-CoV-2 and Hepatitis B virus, risk of allergy and autoantibodies protein binding/immune system**

## A0A7S5EYL7

```

>tr|A0A7S5EYL7|A0A7S5EYL7_HUMAN IGH c4094_heavy_IGHV3-21_IGHD5-18_IGHJ4
(Fragment) OS=Homo sapiens OX=9606 PE=2 SV=1
EVHLVESGGGLVKPGGSLRLSCAASGFTTFSSYSMNWVRQAPGKGLEWVSSISSSSRSIYY
ADSVKGRFTISRDN AKNSLYLQMNSLRAEDTAVYYCASPLSRGYSYIFDYWGQGT LVTVSS

```

### BLAST Sequence alignment against nr

>anti-SARS-CoV-2 immunoglobulin heavy chain variable region, partial [Homo sapiens]

Sequence ID: QTX15853.1 Length: 125

Range 1: 1 to 125

Score:199 bits(507), Expect:1e-63,  
Method:Compositional matrix adjust.,  
Identities:107/125(86%), Positives:114/125(91%), Gaps:4/125(3%)

```

Query  1      EVHLVESGGGLVKPGGSLRLSCAASGFTTFSSYSMNWVRQAPGKGLEWVssisssrsiYY  60
          EV LVESGGG+VKPGGSLRLSCAASGFTFS+YSMNWVRQAPGKGLEWVSSISSSS I+Y
Sbjct  1      EVQLVESGGGVVKPGGSLRLSCAASGFTTFSTYSMNWVRQAPGKGLEWVSSISSSSSTDIHY  60

Query  61      ADSVKGRFTISRDN AKNSLYLQMNSLRAEDTAVYYCASPLSRGY----SYIFDYWGQGT L  116
          ADS+KGRFTISRDN AKNSLYLQMNSLRAEDTAVYYCA      RG+      +YIFD+WGQGT L
Sbjct  61      ADSMKGRFTISRDN AKNSLYLQMNSLRAEDTAVYYCARDFHRGWYDHSAYIFDFWGQGT L  120

Query  117     VTVSS      121
          VTVSS
Sbjct  121     VTVSS      125

```

>anti-SARS-CoV-2 immunoglobulin gamma, partial [Homo sapiens]

Sequence ID: QTI96680.1 Length: 126

Range 1: 1 to 126

Score:197 bits(502), Expect:8e-63,  
Method:Compositional matrix adjust.,  
Identities:107/126(85%), Positives:110/126(87%), Gaps:5/126(3%)

```

Query  1      EVHLVESGGGLVKPGGSLRLSCAASGFTTFSSYSMNWVRQAPGKGLEWVssisssrsiYY  60
          EV LVESGGGLV+PGGSLRLSCAASGFTTFSSY MNWVRQAPGKGLEWVS ISSS +IYY
Sbjct  1      EVQLVESGGGLVQPGGSLRLSCAASGFTTFSSYEMNWVRQAPGKGLEWVS YISSSGSTIYY  60

Query  61      ADSVKGRFTISRDN AKNSLYLQMNSLRAEDTAVYYCASPLS-----RGYSYIFDYWGQGT  115
          ADSVKGRFTISRDN AKNSLYLQMNSLRAEDTAVYYCA      S      Y+ IFDYWGQGT
Sbjct  61      ADSVKGRFTISRDN AKNSLYLQMNSLRAEDTAVYYCARDYSYCSSTSCYTSIFDYWGQGT  120

Query  116     LVTVSS      121
          LVTVSS
Sbjct  121     LVTVSS      126

```

>anti-peanut 2S albumin immunoglobulin heavy chain variable region, partial [Homo sapiens]



Sequence ID: QVG74488.1 Length: 120  
Range 1: 1 to 120

Score:196 bits(499), Expect:2e-62,  
Method:Compositional matrix adjust.,  
Identities:106/121(88%), Positives:111/121(91%), Gaps:1/121(0%)

```
Query 1 EVHLVESGGGLVKPGGSLRLSCAASGFTFSSYSMNWVRQAPGKGLEWVssisssrsiYY 60
        EV LVESGGGLV+PGGSLRLSCAASGFTFSSY MNWVRQAPGKGLEWVS ISSSS +IYY
Sbjct 1 EVQLVESGGGLVQPGGSLRLSCAASGFTFSSYCMNWVRQAPGKGLEWVSyiSSSSNTIYY 60

Query 61 ADSVKGRFTISRDNAKNSLYLQMNSLRAEDTAVYYCASPLSRGYSYIFDYWGQGLTVTVSS 121
        ADSVKGRFTISRDNAKNSLYLQMNSLRAEDTAVY+CA + G+ Y FDYWGQGLTVTVSS
Sbjct 61 ADSVKGRFTISRDNAKNSLYLQMNSLRAEDTAVYFCARDKTSGWY-FDYWGQGLTVTVSS 120
```

**Correlate: Protective capacity against SARS-CoV-2 and risk of allergy**

## Asymptomatic cases

### A0A5C2GJF4

```
>tr|A0A5C2GJF4|A0A5C2GJF4_HUMAN IG c470_heavy_IGHV3-33_IGHD1-26_IGHJ4
(Fragment) OS=Homo sapiens OX=9606 PE=2 SV=1
QVQLVQSGGGVVPQGGSLRLSCAASGFTFSSYGIHWVRQAPGKGLDWVAFIRSDGSNKYY
ADSVRGRFIIIRDNSKNTLYLQMNSLRRTDDAAVYYCAKGGDEWDLWGAHFDYWGQGLTVT
VSS
```

#### BLAST Sequence alignment against nr

```
>anti-SARS-CoV-2 immunoglobulin heavy chain variable region, partial [Homo
sapiens]
Sequence ID: UKB89119.1 Length: 123
Range 1: 19 to 123
```

```
Score:181 bits(459), Expect:3e-56,
Method:Compositional matrix adjust.,
Identities:88/105(84%), Positives:94/105(89%), Gaps:0/105(0%)
```

```
Query 19 RLSCAASGFTFSSYGIHWVRQAPGKGLDWVAFIRSDGSNKYYADSVRGRFIIIRDNSKNT 78
          RLSCAASGFTFSSYG+HWVRQAPGKGL+WVA I DGSNKYYADSV+GRF ISRDNSKNT
Sbjct 19 RLSCAASGFTFSSYGMHWVRQAPGKGLEWVAVISYDGSNKYYADSVKGRFTIIRDNSKNT 78

Query 79 LYLQMNSLRRTDDAAVYYCAKGGDEWDLWGAHFDYWGQGLTVTVSS 123
          LYLQMNSLR +D AVYYCAKGG +D G +FDYWGQGLTVTVSS
Sbjct 79 LYLQMNSLRAEDTAVYYCAKGGGWYDYKGYFFDYWGQGLTVTVSS 123
```

```
>anti-glycoprotein VI immunoglobulin heavy chain variable region antibody,
partial [Homo sapiens]
Sequence ID: AAN15190.1 Length: 119
Range 1: 19 to 119
```

```
Score:178 bits(452), Expect:2e-55,
Method:Compositional matrix adjust.,
Identities:88/105(84%), Positives:92/105(87%), Gaps:4/105(3%)
```

```
Query 19 RLSCAASGFTFSSYGIHWVRQAPGKGLDWVAFIRSDGSNKYYADSVRGRFIIIRDNSKNT 78
          RLSCAASGFTFSSYG+HWVRQAPGKGL+WVAFIR DGSNKYYADSV+GRF ISRDNSKNT
Sbjct 19 RLSCAASGFTFSSYGMHWVRQAPGKGLEWVAFIRYDGSNKYYADSVKGRFTIIRDNSKNT 78

Query 79 LYLQMNSLRRTDDAAVYYCAKGGDEWDLWGAHFDYWGQGLTVTVSS 123
          LYLQMNSLR +D AVYYCAKG A FDYWGQGLTVTVSS
Sbjct 79 LYLQMNSLRAEDTAVYYCAKG----PRIAASFYWGQGLTVTVSS 119
```

**Correlate: Protective capacity against SARS-CoV-2 and thrombosis.**

### A0A5C2FZ03

```
>tr|A0A5C2FZ03|A0A5C2FZ03_HUMAN IGL c497_light_IGKV1D-17_IGKJ1 (Fragment)
OS=Homo sapiens OX=9606 PE=2 SV=1
DIQMTQSPSAMSASVGDRVTITCRASQGISNYLAWFQQKPGKVPKRLIYAASNLSQSGVPS
RFSGSGSGTEFTLTISLQSEDFATYYCLQHNSYPRTFGQGTKVEIK
```

#### BLAST Sequence alignment against nr

```
anti-SARS-CoV-2 immunoglobulin light chain variable region, partial [Homo
sapiens]
Sequence ID: QKK35737.1 Length: 107
>immunoglobulin light chain variable region, partial [Homo sapiens]
Sequence ID: QXE98237.1 Length: 107
```

Range 1: 1 to 107

Score:204 bits(519), Expect:6e-66,  
Method:Compositional matrix adjust.,  
Identities:98/107(92%), Positives:103/107(96%), Gaps:0/107(0%)

```
Query 1 DIQMTQSPSAMSASVGDRVTITCRASQGISNYLAWFQQKPGKVPKRLIYAASNLSQSGVPS 60
        DIQ+TQSPSAMSASVGDRVTITCRASQGI++ LAWFAQKPGKVPKRLIYAASNLSQ+GVPS
Sbjct 1 DIQLTQSPSAMSASVGDRVTITCRASQGINDLAWFQQKPGKVPKRLIYAASNLSQNGVPS 60

Query 61 RFSGSGSGTEFTLTISSLQSEDFATYYCLQHNSYPRTFGQGTKVEIK 107
        RFSGSGSGTEFTLTISSLQ EDFATYYCLQHNSYP TFG GTK+EIK
Sbjct 61 RFSGSGSGTEFTLTISSLQPEDFATYYCLQHNSYPLTFGGGTKLEIK 107
```

>anti-ZIKV immunoglobulin light chain variable region, partial [Homo sapiens]

Sequence ID: AOT82813.1 Length: 110  
Range 1: 1 to 107

Score:202 bits(513), Expect:5e-65,  
Method:Compositional matrix adjust.,  
Identities:97/107(91%), Positives:101/107(94%), Gaps:0/107(0%)

```
Query 1 DIQMTQSPSAMSASVGDRVTITCRASQGISNYLAWFQQKPGKVPKRLIYAASNLSQSGVPS 60
        DI MTQSPS++SASVGDRVTITCRASQGI N L W+QQKPGK PKRLIYAAS+LSQSGVPS
Sbjct 1 DIVMTQSPSSLSASVGDRVTITCRASQGINDLGWYQQKPGKAPKRLIYAASSLSQSGVPS 60

Query 61 RFSGSGSGTEFTLTISSLQSEDFATYYCLQHNSYPRTFGQGTKVEIK 107
        RFSGSGSGTEFTLTISSLQ EDFATYYCLQHNSYPRTFGQGTKVEIK
Sbjct 61 RFSGSGSGTEFTLTISSLQPEDFATYYCLQHNSYPRTFGQGTKVEIK 107
```

>anti HBs antibody light-chain Fab fragment, partial [Homo sapiens]

Sequence ID: BAB18259.1 Length: 214  
Range 1: 1 to 107

Score:202 bits(514), Expect:1e-63,  
Method:Compositional matrix adjust.,  
Identities:95/107(89%), Positives:101/107(94%), Gaps:0/107(0%)

```
Query 1 DIQMTQSPSAMSASVGDRVTITCRASQGISNYLAWFQQKPGKVPKRLIYAASNLSQSGVPS 60
        DI++TQSPSAM+ASVGDRVTITCRASQGI NYL WFQQKPGKVPKRLIYAAS+LSQSGVPS
Sbjct 1 DIELTQSPSAMAASVGDRVTITCRASQGIGNYLVWFQQKPGKVPKRLIYAASSLSQSGVPS 60

Query 61 RFSGSGSGTEFTLTISSLQSEDFATYYCLQHNSYPRTFGQGTKVEIK 107
        RFSGSGSGTEFTLTISSLQ EDFATYYCL HN+YP +FG GTKVEIK
Sbjct 61 RFSGSGSGTEFTLTISSLQPEDFATYYCLHHNNYPLSFGGGTKVEIK 107
```

**Correlate: Protective capacity against SARS-CoV-2, Zika virus and Hepatitis B virus**

## A0A5C2G410

>tr|A0A5C2G410|A0A5C2G410\_HUMAN IGL c4031\_light\_IGKV3-15\_IGKJ1 (Fragment)  
OS=Homo sapiens OX=9606 PE=2 SV=1  
EIVMTQSPATVSVYPGERATLSCRASQSVSTNLAWYQQKPGQAPRLLMYGASTRATDIPL  
RFSGSGSGTEFTLTISSLQSEDFAVYYCQHYHNPRTFGQGTKVESE

**BLAST Sequence alignment against nr**

>rotavirus-specific intestinal-homing antibody light chain variable region,  
partial [Homo sapiens]

Sequence ID: AAW67418.1 Length: 109  
Range 1: 3 to 107

Score:201 bits(512), Expect:8e-65,  
Method:Compositional matrix adjust.,  
Identities:96/105(91%), Positives:101/105(96%), Gaps:0/105(0%)

```
Query 1 EIVMTQSPATVSVYPGERATLSCRASQSVSTNLAWYQQKPGQAPRLLMYGASTRATDIPL 60
Sbjct 3 EIVMTQSPATLSVSPGERATLSCRASQSVSSNLAWYQQKPGQAPRLLIYGASTRATGIPA 62

Query 61 RFSGSGSGTEFTLTISSLQSEDFAVYYCQHYHNWPRTFGQGTKVE 105
Sbjct 63 RFSGSGSGTEFTLTISSLQSEDFAVYYCQYNNWPRTFGQGTKVD 107
```

>anti-SARS-CoV-2 spike protein immunoglobulin light chain variable region,  
partial [Homo sapiens]  
Sequence ID: QKY76147.1 Length: 107  
Range 1: 1 to 105

Score:199 bits(506), Expect:5e-64,  
Method:Compositional matrix adjust.,  
Identities:95/105(90%), Positives:100/105(95%), Gaps:0/105(0%)

```
Query 1 EIVMTQSPATVSVYPGERATLSCRASQSVSTNLAWYQQKPGQAPRLLMYGASTRATDIPL 60
Sbjct 1 EIVMTQSPATLSVSPGERATLSCRASQSVSSNLAWYQQKPGQAPRLLIYGASTRATGIPA 60

Query 61 RFSGSGSGTEFTLTISSLQSEDFAVYYCQHYHNWPRTFGQGTKVE 105
Sbjct 61 RFSGSGSGTEFTLTISSLQSEDFAVYYCQYNNWPRTFGQGNRVE 105
```

**Correlate: Protective capacity against SARS-CoV-2 and rotavirus**
