# Supplementary material for: Correlates with Vaccine Protective Capacity and COVID-19 Disease Symptoms Identified by Serum Proteomics in Vaccinated Individuals
Source: Molecules. 2022 Sep 13;27(18):5933. doi: 10.3390/molecules27185933 (PMC9500703; doi:10.3390/molecules27185933)
Supplement: Supplementary file 1 [file molecules-27-05933-s001.zip]

Archive with 4 entries (4 files):
- Data file S1.xlsx
- Data file S2.pdf
- Data file S3.xlsx
- Data file S4.pdf
