# Supplementary material for: Correlates with Vaccine Protective Capacity and COVID-19 Disease Symptoms Identified by Serum Proteomics in Vaccinated Individuals
Source: Molecules. 2022 Sep 13;27(18):5933. doi: 10.3390/molecules27185933 (PMC9500703; doi:10.3390/molecules27185933)
Supplement: Supplementary file 1 [file molecules-27-05933-s001.zip › Data file S1.xlsx]

## Sheet: Protein areas
Data file S1. Serum proteomics analysis.
Row	Peak Name	Group	SW_A1-1	SW_A1-2	SW_A2-1	SW_A2-2	SW_A3-1	SW_A3-2	SW_A4-1	SW_A4-2	SW_A5-1	SW_A5-2	SW_C1-1	SW_C1-2	SW_C2-1	SW_C2-2	SW_C3-1	SW_C3-2	SW_C4-1	SW_C4-2	SW_C5-1	SW_C5-2	SW_L1-1	SW_L1-2	SW_L2-1	SW_L2-2	SW_L3-1	SW_L3-2	SW_L4-1	SW_L4-2	SW_L5-1	SW_L5-2	SW_S1-1	SW_S1-2	SW_S2-1	SW_S2-2	SW_S3-1	SW_S3-2	SW_S4-1	SW_S4-2	SW_S5-1	SW_S5-2	SW_UCI1-1	SW_UCI1-2	SW_UCI1-3	SW_UCI1-4	SW_UCI1-5	SW_UCI2-1	SW_UCI2-2
1	tr|C0JYY2|C0JYY2_HUMAN	Apolipoprotein B (Including Ag(X) antigen) OS=Homo sapiens OX=9606 GN=APOB PE=4 SV=1	1.738e+06	1.69298e+06	1.19886e+06	1.24047e+06	324467	314634	1.13417e+06	1.18145e+06	1.34444e+06	1.38638e+06	1.1115e+06	1.08893e+06	1.95389e+06	1.9104e+06	1.63267e+06	1.88956e+06	905044	807936	1.35164e+06	1.16868e+06	1.55084e+06	1.51394e+06	690536	623925	676995	672752	646652	668022	1.24522e+06	1.18976e+06	886075	899325	1.29818e+06	1.11786e+06	1.27018e+06	1.2347e+06	824057	773082	1.35354e+06	1.70188e+06	1.54393e+06	1.4782e+06	1.69477e+06	1.40947e+06	1.69198e+06	2.11969e+06	1.87363e+06
2	sp|P02768|ALBU_HUMAN	Albumin OS=Homo sapiens OX=9606 GN=ALB PE=1 SV=2	144934	124621	189403	217187	442328	558565	532255	406894	220171	120381	733024	596918	238086	283439	156371	142715	142915	136078	110988	99526.6	168871	128554	295333	261201	138128	126236	300549	138440	385446	359029	162718	149710	252968	263777	117851	120926	2.28377e+06	1.8691e+06	298047	345701	492718	522008	382593	425328	469509	293169	257847
3	tr|V9HWA9|V9HWA9_HUMAN	C3-beta-c OS=Homo sapiens OX=9606 GN=HEL-S-62p PE=2 SV=1	2.11709e+06	2.88136e+06	3.55359e+06	3.70083e+06	4.70837e+06	4.97049e+06	4.55147e+06	4.74447e+06	3.93367e+06	3.93853e+06	2.57025e+06	3.74343e+06	3.48874e+06	3.45146e+06	2.40933e+06	2.88924e+06	2.74546e+06	2.75222e+06	2.43951e+06	4.16813e+06	2.9106e+06	2.93817e+06	3.76613e+06	3.98516e+06	1.59153e+06	2.32597e+06	1.98784e+06	2.38556e+06	5.44597e+06	5.33388e+06	4.64696e+06	4.74023e+06	4.52489e+06	4.52014e+06	2.66578e+06	2.40028e+06	4.23949e+06	4.36406e+06	3.67137e+06	3.82002e+06	6.10985e+06	5.46683e+06	5.96267e+06	5.62477e+06	6.17926e+06	7.33554e+06	7.37418e+06
4	sp|P01023|A2MG_HUMAN	Alpha-2-macroglobulin OS=Homo sapiens OX=9606 GN=A2M PE=1 SV=3	1.1786e+07	1.48498e+07	1.06278e+07	1.11363e+07	6.27732e+06	6.70515e+06	7.11395e+06	6.53976e+06	3.1056e+06	3.00896e+06	1.44495e+07	1.47842e+07	5.76047e+06	5.72436e+06	4.10312e+06	3.90884e+06	7.13688e+06	7.43258e+06	1.16076e+07	8.91059e+06	6.44367e+06	5.24013e+06	6.52088e+06	6.63536e+06	5.75091e+06	5.67536e+06	6.23032e+06	7.81836e+06	2.7861e+06	2.55567e+06	1.55582e+07	1.62876e+07	9.63858e+06	9.63004e+06	4.17711e+06	3.94557e+06	1.30566e+07	1.14238e+07	8.8949e+06	6.94805e+06	2.21279e+06	2.7342e+06	2.15167e+06	1.87582e+06	2.99883e+06	3.548e+06	3.15357e+06
5	sp|P0C0L4|CO4A_HUMAN	Complement C4-A OS=Homo sapiens OX=9606 GN=C4A PE=1 SV=2	31605.8	31342	114611	132607	58089.6	82321	167990	167157	57417.9	72434.8	96828.6	102267	138858	141167	56296.8	58847.8	23423.3	27294.6	74790.3	61640.8	61871.7	68189	108481	112571	33689.9	37013.5	26447.2	28544.1	168905	166312	65156	70353.1	95113.3	85184.2	63965.4	53402.2	184705	159340	102652	117006	138227	129969	138262	133407	104832	150205	145469
6	tr|A0A384MR03|A0A384MR03_HUMAN	Fibronectin OS=Homo sapiens OX=9606 PE=2 SV=1	318317	273551	446919	501740	236920	242887	593289	592265	176236	184100	152178	147021	400397	389774	269708	247659	251163	248998	469400	467407	358346	365102	375236	368956	175651	173716	305675	320149	425868	420714	212901	233109	451995	432108	278563	257290	263032	235044	301886	324796	506945	442449	462390	426560	492182	312682	280494
7	sp|P01031|CO5_HUMAN	Complement C5 OS=Homo sapiens OX=9606 GN=C5 PE=1 SV=4	358597	356676	357776	388932	257165	299187	406452	440860	241201	247445	352661	311220	327042	309296	274719	291087	220965	244123	340659	356441	371539	348905	280884	367360	241112	234928	205398	212285	437293	428961	259691	283301	357915	341082	286577	300490	373586	335653	504717	569242	692890	614622	669574	611577	643041	603776	566143
8	tr|A5PL27|A5PL27_HUMAN	CP protein OS=Homo sapiens OX=9606 GN=CP PE=2 SV=1	329581	319274	351455	370691	269140	271592	243346	243212	267031	283046	232315	222351	217527	214511	195468	192416	102440	104336	305847	299249	184141	175363	222674	238111	149465	133506	161366	176658	261418	263658	428401	436467	317936	311173	284183	271287	619594	560056	272082	304962	130275	111149	103086	112556	110254	237725	211865
9	tr|A0A384MDQ7|A0A384MDQ7_HUMAN	Epididymis secretory sperm binding protein OS=Homo sapiens OX=9606 PE=2 SV=1	451081	455416	2.70707e+06	3.07032e+06	591400	956565	547447	559562	354034	368509	1.64129e+06	1.67626e+06	460545	429967	309560	328651	184323	174204	854358	838683	222550	213055	202309	208042	806641	802810	326242	375773	200014	204966	1.59962e+06	1.73247e+06	2.33531e+06	2.26208e+06	168499	164602	1.71198e+06	1.52751e+06	1.16051e+06	1.26969e+06	2.53239e+06	2.38728e+06	2.80281e+06	2.46457e+06	2.5484e+06	2.86375e+06	2.33374e+06
10	sp|P00747|PLMN_HUMAN	Plasminogen OS=Homo sapiens OX=9606 GN=PLG PE=1 SV=2	783957	698240	797840	866688	449393	478163	803746	825212	721595	747391	487498	500564	736868	670826	549503	503448	462793	482187	634727	625961	534741	557903	653312	653520	498289	609377	586068	619312	655814	653674	692162	723606	614081	627571	546705	533168	916534	820609	712309	779434	738395	653673	700908	657275	686847	687687	570064
11	sp|P00738|HPT_HUMAN	Haptoglobin OS=Homo sapiens OX=9606 GN=HP PE=1 SV=1	1.54927e+07	1.96854e+07	2.04869e+07	1.50747e+07	1.50092e+07	1.3861e+07	2.77915e+07	3.02908e+07	2.94023e+06	3.14051e+06	1.64296e+07	1.52028e+07	9.28115e+06	1.01445e+07	1.78861e+07	1.24183e+07	1.02899e+07	9.54882e+06	9.82013e+06	1.00384e+07	1.16832e+07	1.37241e+07	2.3682e+07	1.64411e+07	7.01177e+06	6.84064e+06	6.42126e+06	5.85166e+06	1.33084e+07	1.37036e+07	1.36548e+07	1.44955e+07	1.72984e+07	1.77369e+07	1.40635e+07	1.85756e+07	2.61471e+07	3.30009e+07	2.33138e+07	3.81383e+07	4.0537e+07	3.84441e+07	4.00401e+07	3.88521e+07	4.02927e+07	3.17717e+07	3.64696e+07
12	tr|A0A024R3E3|A0A024R3E3_HUMAN	Apolipoprotein A-I, isoform CRA_a OS=Homo sapiens OX=9606 GN=APOA1 PE=2 SV=1	4.66062e+07	4.42256e+07	4.62552e+07	4.81684e+07	4.62076e+07	4.60962e+07	3.70321e+07	4.00286e+07	7.20205e+07	7.08116e+07	4.41254e+07	4.48119e+07	6.76885e+07	6.61937e+07	5.35634e+07	5.53377e+07	7.44155e+07	7.55536e+07	6.15852e+07	6.19944e+07	5.39136e+07	5.59791e+07	4.88889e+07	5.01294e+07	6.90552e+07	6.84202e+07	6.42456e+07	6.28142e+07	4.44277e+07	4.55384e+07	3.10316e+07	3.22016e+07	4.56417e+07	4.51748e+07	3.76213e+07	3.78634e+07	2.17816e+07	2.10407e+07	3.48344e+07	3.6672e+07	2.58312e+07	2.467e+07	2.62415e+07	2.60038e+07	2.47957e+07	2.05728e+07	1.96622e+07
13	tr|B2RMS9|B2RMS9_HUMAN	Inter-alpha (Globulin) inhibitor H4 (Plasma Kallikrein-sensitive glycoprotein) OS=Homo sapiens OX=9606 GN=ITIH4 PE=2 SV=1	8912.14	9126.83	13989.2	17068.8	7353.5	8799.35	25707.7	27050.5	12815.4	16487.6	16203.4	16847.7	15569.5	14250.4	30461.2	32782.6	14414.7	12694.1	21878.3	20030	17167.9	19578.3	11089.9	10819.7	16426.7	16479.9	14613.7	9294.61	12410	14519.4	7496.76	10779.9	12526.8	11237.3	23646.9	22795.9	31206.6	24673.8	13066	15105.1	54143.9	50741.6	50438.5	45488.7	46771.6	54679.8	60974.2
14	tr|V9HWI6|V9HWI6_HUMAN	Gc-globulin OS=Homo sapiens OX=9606 GN=HEL-S-51 PE=2 SV=1	5092.88	3295.58	1566.34	3165.64	1923.19	4517.87	2503.92	3975.59	5847.13	4297.35	3658.2	1709.74	1947.87	2698.87	3136.66	2770.82	4156.9	4443.9	7917.5	5769.36	5900.78	5065.19	13645.6	2980.03	6083.61	5328.15	4952.41	5128.24	7995.26	2068.54	3919.34	4247.83	16002.7	9994.89	4762.42	3729.86	10635.5	3901.97	5594.5	4652.72	6130.97	16725.8	9979.87	3785.45	1186.37	6972.04	5844.75
15	tr|B3KS79|B3KS79_HUMAN	cDNA FLJ35730 fis, clone TESTI2003131, highly similar to ALPHA-1-ANTICHYMOTRYPSIN OS=Homo sapiens OX=9606 PE=2 SV=1	2.4589e+06	2.72488e+06	2.4422e+06	2.53405e+06	1.6715e+06	1.78266e+06	2.90786e+06	3.034e+06	965112	987593	2.85809e+06	2.8843e+06	1.11455e+06	1.07156e+06	1.29083e+06	1.54283e+06	900426	1.13776e+06	1.40903e+06	1.42751e+06	1.81177e+06	1.86477e+06	2.05835e+06	2.1167e+06	1.12438e+06	1.33714e+06	1.0229e+06	1.0634e+06	3.13795e+06	3.85848e+06	3.35941e+06	3.25881e+06	2.05969e+06	2.06997e+06	5.78864e+06	5.6255e+06	4.79154e+06	5.15511e+06	4.36095e+06	4.703e+06	8.16594e+06	1.00848e+07	1.04977e+07	1.03089e+07	7.99883e+06	8.95382e+06	9.38157e+06
16	sp|P02790|HEMO_HUMAN	Hemopexin OS=Homo sapiens OX=9606 GN=HPX PE=1 SV=2	8.99636e+06	8.8274e+06	5.81222e+06	4.69486e+06	7.74204e+06	8.01029e+06	6.05469e+06	7.23052e+06	4.93407e+06	5.4612e+06	6.59346e+06	6.35686e+06	7.78731e+06	7.97389e+06	5.86889e+06	5.69749e+06	7.64062e+06	7.58658e+06	4.84587e+06	4.95821e+06	8.43171e+06	8.66958e+06	5.77995e+06	4.90389e+06	5.17875e+06	5.22965e+06	4.26631e+06	4.15463e+06	1.11888e+07	1.10555e+07	6.19207e+06	5.39761e+06	6.26255e+06	6.32568e+06	8.01595e+06	7.26921e+06	7.79467e+06	6.74723e+06	7.70442e+06	8.56536e+06	6.49732e+06	6.21014e+06	5.27698e+06	6.48484e+06	6.45941e+06	6.06639e+06	6.00374e+06
17	sp|P04003|C4BPA_HUMAN	C4b-binding protein alpha chain OS=Homo sapiens OX=9606 GN=C4BPA PE=1 SV=2	84768.9	75955.4	80503.8	83920.1	52861	56426.1	89428.3	89174.9	30000.9	38703.2	37297.1	36788.8	47480.7	56010.3	52161.3	48748.7	48237.3	47998.8	60231.4	47398.3	57989.6	62604.3	54485.5	57764.7	35589.3	44876	52358.5	53719.7	106296	82526.1	85726.2	102814	60685.3	56508.6	110206	88670.2	119551	126547	110109	114052	74904.7	74383.5	64840.8	64913.8	75241.6	85044.7	57909.1
18	tr|B7Z549|B7Z549_HUMAN	cDNA FLJ56821, highly similar to Inter-alpha-trypsin inhibitor heavy chain H1 OS=Homo sapiens OX=9606 PE=2 SV=1	333666	285279	443743	478560	238505	258398	246296	242662	536826	550541	305070	339679	525302	532943	352690	377786	242922	254396	449355	435541	462575	509391	401566	431494	343066	364930	409892	434198	429222	406297	282402	311494	427128	398903	341471	318125	360763	271924	398241	441125	409657	359198	356223	344389	367051	336481	314012
19	sp|P00734|THRB_HUMAN	Prothrombin OS=Homo sapiens OX=9606 GN=F2 PE=1 SV=2	623836	579908	497848	533151	351018	357824	511859	524099	419823	449642	465747	398000	543641	547294	441329	440457	378339	379839	422337	428492	679781	655455	469874	490406	416420	428711	407311	418823	554957	522555	553439	563762	490668	503817	404690	390771	527578	453868	549616	618641	592820	540136	555471	553018	606832	493894	452210
20	tr|D3DRR6|D3DRR6_HUMAN	Inter-alpha (Globulin) inhibitor H2, isoform CRA_a OS=Homo sapiens OX=9606 GN=ITIH2 PE=3 SV=1	605276	553021	677946	717124	556137	567266	474015	422333	704318	722523	684640	717480	824441	809883	568334	549782	428273	433615	792975	738829	712090	748214	467733	503911	531145	580429	557200	559979	759161	754286	433990	480874	704063	690997	440808	416802	492257	473693	720099	778016	712234	625724	633632	540355	615853	552255	500148
21	tr|B4E1C2|B4E1C2_HUMAN	Bradykinin OS=Homo sapiens OX=9606 GN=KNG1 PE=2 SV=1	1223.38	4275.75	3874.01	2480.56	2059.02	727.641	1218.47	1992.39	1397.76	1691.3	2878.85	3266.35	2038.23	3917.93	3064.85	2133.45	1459.49	2399.94	2679.49	1764.84	1175.82	2412.14	417.782	1461.08	1872.51	543.991	1775.9	1600.17	2506.19	1979.71	1588.9	1027.15	1099.75	887.838	1436.29	1988.12	1833.65	2800.66	1874.82	2675.7	2815.18	2618.29	2210.4	2440.58	1711.25	1730.14	864.275
22	sp|P06727|APOA4_HUMAN	Apolipoprotein A-IV OS=Homo sapiens OX=9606 GN=APOA4 PE=1 SV=4	86436.1	80179.7	274600	244444	188720	162129	240229	236186	197639	208410	308188	381588	389012	415033	144789	154622	392741	540312	303299	309416	299318	355809	111786	95695.5	163962	184487	189675	172645	152745	159997	111911	133904	203923	214565	94205.9	100601	216610	230537	98901.7	76014.5	94649.6	151342	141378	81471.3	73740.4	146654	108135
23	tr|A0A2S0BDD1|A0A2S0BDD1_HUMAN	Antithrombin-III OS=Homo sapiens OX=9606 GN=ATIII-R2 PE=2 SV=1	971506	882385	927879	925603	619593	646030	942429	912847	419048	390468	1.10261e+06	1.04894e+06	712970	671367	581657	589421	303927	330318	794038	791345	760229	855442	849276	800819	756242	756512	605365	625985	835514	822863	619388	672527	790825	780434	670717	624346	1.0664e+06	962315	895066	943635	1.18284e+06	1.07711e+06	1.16524e+06	1.0817e+06	1.15229e+06	905230	840723
24	tr|L8E853|L8E853_HUMAN	von Willebrand factor OS=Homo sapiens OX=9606 GN=VWF PE=1 SV=1	17841.4	21620	79838.5	70302.6	23376	21555.7	50883.2	54235.9	6839.51	12053.1	51894	54545.4	15553.5	14841.8	11167.1	43733.8	26583.8	7743.79	19252.8	8420.39	30023.7	40127.5	26307.7	25088	7786.89	12884.2	86645.6	23498.9	30857.1	33770.8	43501	61431.6	40336.9	37912	56939.3	58487.7	58540.7	50096.2	32570	51471.2	65471.8	53976.6	65026.1	53894.4	66875.9	47825.3	37320.5
25	tr|V9HW34|V9HW34_HUMAN	Epididymis luminal protein 213 OS=Homo sapiens OX=9606 GN=HEL-213 PE=2 SV=1	2514.07	3194.12	1646.62	1204.1	3287.49	3518.69	6588.55	3559.6	6790.61	8023.48	1470.07	2930.89	4140.9	2501.56	7161.47	7521.14	3055.9	2702.86	4947.75	2464.17	10204.2	11723.6	7375.69	6958.75	4791.29	4287.84	8246.26	8096.04	947.179	1075.81	6728.59	5469.91	4775.96	4718.22	5011.79	4025.54	2973.81	187.95	2739.18	3886.18	1225.76	2789.15	746.166	3194.77	3185.61	5666.38	7525.68
26	sp|P09871|C1S_HUMAN	Complement C1s subcomponent OS=Homo sapiens OX=9606 GN=C1S PE=1 SV=1	74106.4	77139.3	110992	120480	123617	127880	193808	196344	98201.8	89287.8	140655	137984	134470	120831	117413	125134	82427.7	66505.4	102481	114580	121048	133521	123436	145809	86678.6	106208	96455.5	126256	155375	145069	154167	145192	143041	128354	126649	138034	179034	152758	137006	147631	287016	260305	277875	252840	261181	174731	155176
27	tr|Q96K68|Q96K68_HUMAN	cDNA FLJ14473 fis, clone MAMMA1001080, highly similar to Homo sapiens SNC73 protein (SNC73) mRNA OS=Homo sapiens OX=9606 PE=2 SV=1	19766	19896.3	17946.2	23206.4	26526.5	26601.5	31579.4	32103.7	27537.7	28617.6	9780.32	14813.5	18612.3	22933.7	18375.8	18386.9	9707.11	12280.5	19113.3	17414.6	13557.8	14587.6	26311.7	26219.3	15886	18413.6	28519.7	29276.8	10605.7	8825.87	29754	32317.1	59677.7	62545.9	13196	11568.3	33814.3	26408.9	78057.7	83744.7	8134.85	10278.1	11467.2	10635	9564.24	36474.1	38185.3
28	sp|P00736|C1R_HUMAN	Complement C1r subcomponent OS=Homo sapiens OX=9606 GN=C1R PE=1 SV=2	60652.4	44896.5	71800.2	66265.7	112887	108430	156980	117491	69843.4	51775.8	156035	141735	132952	93292.7	117453	92357.2	59494	56593.6	124626	116316	117132	115400	121794	110576	94418.2	94146.5	100771	114552	109843	79619	132322	104634	145690	138013	99817.4	126359	181634	167441	125817	119949	220129	194452	191996	209692	187625	140139	117307
29	tr|A0A384MEF1|A0A384MEF1_HUMAN	Actin-depolymerizing factor OS=Homo sapiens OX=9606 PE=2 SV=1	111211	113177	166274	188689	149655	151139	186186	180489	161796	183795	208543	199131	280704	270453	198242	198182	150004	149283	212120	210870	253637	284016	172496	198061	189202	201999	215276	189501	187116	177328	142876	153416	151838	156555	201767	197131	203631	168521	139496	132049	50782	38623.2	37809.9	29701.2	26459.5	65431.8	51650.9
30	sp|P01871|IGHM_HUMAN	Immunoglobulin heavy constant mu OS=Homo sapiens OX=9606 GN=IGHM PE=1 SV=4	181872	178322	280077	292858	309934	315048	136005	135729	256307	275511	427668	420030	281717	293532	379283	374168	94755.2	93782.5	202329	191533	167770	198237	458312	436560	260494	249256	513793	542822	69822	70443.6	92639.7	120281	288419	272999	304435	301232	163942	142133	178650	174522	204915	189001	203106	151927	173051	206823	186782
31	tr|A0A024R035|A0A024R035_HUMAN	Complement component C9 OS=Homo sapiens OX=9606 GN=C9 PE=3 SV=1	177542	173664	250587	259644	352194	369486	497135	498246	76742.6	83696.8	238047	257420	185001	189296	182793	190965	84082.5	73316.1	213493	202515	192983	189937	296231	295189	180588	160084	131666	128275	424016	394900	246189	315311	268993	275003	409936	428131	547842	485730	348272	381478	829419	793566	809260	584929	649721	767456	538238
32	sp|P13671|CO6_HUMAN	Complement component C6 OS=Homo sapiens OX=9606 GN=C6 PE=1 SV=3	6437.66	1340.47	9092.44	30000.1	9443.36	9310	4027.63	647.025	983.609	2142.01	8431.6	8926.19	6549.3	5892.62	933.818	2480.51	918.851	3545.69	3633.4	1634.44	3746.97	780.878	7596.1	2081.14	6113.15	4679.47	3168.81	3114.38	11055.2	9394.05	7518.98	5553.29	5880.19	10279.8	4886.06	5758.96	16874.7	15429.8	15784.6	13351.3	14070.8	13025.8	12537.3	14115.5	15548.6	7709.23	8354.68
33	tr|G3XAM2|G3XAM2_HUMAN	Complement factor I OS=Homo sapiens OX=9606 GN=CFI PE=1 SV=1	116790	112769	178854	180215	128700	226525	149392	145008	98179.7	96973.3	117591	116766	123128	118949	141674	120071	73964.6	69429.3	113698	119768	119340	124893	138191	146399	105540	92769.1	96843.5	105625	165015	166223	165299	174169	169422	174070	137457	133351	212723	187266	176756	195668	182795	162277	173013	165341	176303	211239	200134
34	tr|H0YAC1|H0YAC1_HUMAN	Plasma kallikrein (Fragment) OS=Homo sapiens OX=9606 GN=KLKB1 PE=1 SV=1	123987	109889	126838	122926	82371.5	68243	84800	89278	95486	105093	105030	96065.3	114681	117495	110274	83667.5	69151.5	59475.7	120042	88483.3	146494	141142	122967	136526	82266.8	90354.9	111890	122287	146313	135364	100190	97513.4	154746	153785	75195.8	73894.1	124863	99888.5	142063	139984	64779.1	45830.3	52102.8	55380.3	51298.5	45409.4	43783.7
35	tr|A0A0S2Z3D5|A0A0S2Z3D5_HUMAN	Apolipoprotein E isoform 1 (Fragment) OS=Homo sapiens OX=9606 GN=APOE PE=2 SV=1	371043	393956	463713	495702	287118	309621	419115	414611	235546	257670	428508	482494	430923	426057	341093	296082	269339	322868	437567	363447	512107	524919	296504	270590	367047	396237	417034	374512	441248	521071	515459	505492	541635	604333	674948	585379	554432	502069	474516	490738	401254	450544	388819	364960	369644	594732	473747
36	sp|P10643|CO7_HUMAN	Complement component C7 OS=Homo sapiens OX=9606 GN=C7 PE=1 SV=2	3334.64	4806.57	7410.83	6208.3	5599.33	3819.03	2100.88	2498.05	757.407	1053.01	3060.84	949.908	640.234	2149.93	1911.42	2463.37	1822.83	887.719	7212.91	5044.64	2058	453.232	1870.18	4373.66	1223.98	2110.38	2468.54	1177.72	8294.66	7550.64	945.377	1407.7	4972.02	2618.71	2299.52	2317.77	1818.58	6087.31	1942.81	645.158	3220.87	2520.68	3058	1369.42	2818.55	4725.96	1810.89
37	tr|A0A384NKS6|A0A384NKS6_HUMAN	Clusterin OS=Homo sapiens OX=9606 PE=2 SV=1	677101	541316	584150	591936	457459	431711	636817	529584	711292	660430	426840	483072	578357	590953	509397	500492	485054	509367	544334	510229	829745	853508	509627	521599	502421	498671	354828	437502	675231	691810	458109	568775	574868	570280	564596	536632	485958	431936	772625	662966	817544	785639	799030	589097	647846	640274	639976
38	tr|B7ZA94|B7ZA94_HUMAN	Complement component 8 subunit beta OS=Homo sapiens OX=9606 PE=2 SV=1	76805.8	82219.1	144669	161255	72544.8	65083.4	100511	102799	67660.9	71662.4	97203.5	96445.9	109424	105434	81132.5	78903.8	46427.2	50014.6	113574	80187.7	98513.9	101441	127037	129730	85851.3	98926.6	97708	107027	92976.4	90107.4	100876	102072	101723	121309	124154	114708	139343	128508	133946	145685	87812	85239.8	84916.1	83760.6	100430	112959	93984.7
39	sp|P43652|AFAM_HUMAN	Afamin OS=Homo sapiens OX=9606 GN=AFM PE=1 SV=1	297780	260192	321599	329847	185691	192117	215465	197820	448879	468480	336779	299735	432432	425673	335213	334557	336112	330807	259898	236822	266259	282514	283654	267588	280226	271776	234059	225412	472013	456825	394232	435705	313596	303061	193182	180217	161964	142503	251231	271020	135931	132968	123837	121741	130727	92927.3	91150.5
40	sp|P05546|HEP2_HUMAN	Heparin cofactor 2 OS=Homo sapiens OX=9606 GN=SERPIND1 PE=1 SV=3	328709	238171	316362	325966	198924	208050	346677	273573	213973	201703	191526	189453	303432	293501	284899	290894	188612	175195	222861	226216	343173	350090	270049	264302	232501	223189	208029	225381	331071	321634	231627	244729	320577	318175	220344	205675	325253	291473	363510	384508	286460	205179	207432	204576	272359	324142	229503
41	tr|B2R950|B2R950_HUMAN	cDNA, FLJ94213, highly similar to Homo sapiens pregnancy-zone protein (PZP), mRNA OS=Homo sapiens OX=9606 PE=2 SV=1	997647	889596	929110	922661	40896.5	645254	431439	549246	261411	270456	905857	900999	477582	454436	399444	412425	601970	627036	756885	729417	410621	459178	621303	630242	448832	461288	508938	524159	241654	240212	1.32137e+06	21740.7	790411	844251	363527	361184	692041	583006	625434	681200	226877	207400	216959	216996	231169	209107	197216
42	sp|Q06033|ITIH3_HUMAN	Inter-alpha-trypsin inhibitor heavy chain H3 OS=Homo sapiens OX=9606 GN=ITIH3 PE=1 SV=2	90278	90701.2	136576	148023	136113	140551	145601	140955	35248.2	42636.5	191675	187631	56234.2	60991.8	78168.1	76295.9	73844	83035.4	88772	98881.1	82954.1	80946.4	72703.7	74951.1	46669.3	47194.6	48716.4	39710.3	70186.2	67910.6	147700	160755	123753	126132	187596	181899	189808	168375	191422	214250	197627	184332	190982	172880	192953	280747	259201
43	sp|P04196|HRG_HUMAN	Histidine-rich glycoprotein OS=Homo sapiens OX=9606 GN=HRG PE=1 SV=1	636591	305882	304635	913383	259091	416919	218471	731368	364183	379179	972901	1.05712e+06	660973	1.29359e+06	373198	367550	1.09659e+06	732151	495762	440111	479395	469437	398469	380951	500855	516187	705847	755047	124200	128754	238422	292665	328565	553294	164334	206429	321450	306975	351432	342367	288216	275591	407263	254733	242639	366135	311694
44	sp|P08697|A2AP_HUMAN	Alpha-2-antiplasmin OS=Homo sapiens OX=9606 GN=SERPINF2 PE=1 SV=3	168754	150093	167959	166039	92672.3	90476.4	187057	186864	136376	133283	120759	128067	155342	140966	111642	101884	101502	77028.5	148714	155565	166011	170555	191606	197591	146307	141537	121985	139741	176053	159461	139599	157159	177992	153615	130524	124151	186499	174409	130684	129321	172663	161736	181786	151002	176936	226190	209872
45	tr|E9KL26|E9KL26_HUMAN	Epididymis tissue protein Li 173 OS=Homo sapiens OX=9606 GN=SERPING1 PE=2 SV=1	522427	384224	1.05485e+06	975178	269168	244130	1.0498e+06	1.03861e+06	546656	604809	768743	742557	581806	803473	1.09159e+06	1.06134e+06	529048	490778	1.02291e+06	1.01975e+06	932341	1.25696e+06	608934	538647	690763	723384	807356	820685	1.45109e+06	924068	632363	694986	649070	449949	1.22954e+06	1.70984e+06	1.3533e+06	1.27628e+06	1.52952e+06	875508	1.80004e+06	1.90784e+06	680537	1.7265e+06	780414	1.62687e+06	1.56371e+06
46	tr|V9HWD8|V9HWD8_HUMAN	Epididymis secretory sperm binding protein Li 163pA OS=Homo sapiens OX=9606 GN=HEL-S-163pA PE=2 SV=1	1.11868e+06	1.03885e+06	995653	1.04867e+06	1.28591e+06	1.25735e+06	1.28175e+06	1.32036e+06	971573	987593	1.41151e+06	1.36222e+06	1.07372e+06	1.10772e+06	1.10339e+06	1.07571e+06	599212	595323	1.21989e+06	1.48664e+06	1.11392e+06	1.13908e+06	1.32474e+06	1.04947e+06	1.03345e+06	1.05664e+06	964176	798104	1.63296e+06	1.60717e+06	1.74928e+06	1.44596e+06	1.41108e+06	1.4229e+06	1.45328e+06	1.10526e+06	1.59049e+06	1.40235e+06	1.33906e+06	1.4982e+06	936696	648269	902576	694828	948732	1.26145e+06	957616
47	tr|A0A140VK00|A0A140VK00_HUMAN	Testicular tissue protein Li 227 OS=Homo sapiens OX=9606 PE=2 SV=1	359073	351131	392618	399114	371071	359249	348603	361375	187479	201326	495482	467076	495111	491432	253932	260543	287159	267801	283166	278137	477611	497653	301957	326700	295333	293749	298393	274242	578615	518483	438168	453884	467561	474986	460020	429270	436020	422336	468763	516861	733385	674006	672727	641995	687160	586809	543370
48	tr|D9YZU5|D9YZU5_HUMAN	Beta-globin OS=Homo sapiens OX=9606 GN=HBB PE=3 SV=1	86159.5	75433.7	63645.6	65855.7	1.22648e+06	1.21265e+06	42281.1	40093.7	152255	161215	140221	132851	79449.6	79537.5	81179	81685.2	33414.5	33781.1	31921	24819.9	323612	322077	227455	232987	1.04366e+06	1.05716e+06	394610	391793	329463	322434	1.28197e+06	1.36901e+06	81278.9	79771.8	1.32963e+06	1.29412e+06	269556	232694	62400.4	67101.8	113616	88349.7	97983	104047	111299	44552.7	41846.7
49	tr|D9IWP9|D9IWP9_HUMAN	Apolipoprotein H (Fragment) OS=Homo sapiens OX=9606 PE=2 SV=1	548763	672912	835195	1.056e+06	1.02094e+06	1.0161e+06	638132	583867	433714	373682	373337	443121	1.07347e+06	1.3962e+06	673160	636006	839468	605999	937240	901297	746232	654691	499188	547703	537754	592010	856336	796925	648722	276099	610576	697108	790456	923169	640281	612564	672926	335540	690637	689517	1.09137e+06	1.1991e+06	1.37037e+06	835770	910113	925725	950958
50	tr|Q9NSD0|Q9NSD0_HUMAN	Vitamin K-dependent protein S OS=Homo sapiens OX=9606 PE=2 SV=1	209229	184507	167219	185748	138249	145783	206198	199327	108952	112035	163031	158854	149484	137666	143777	148911	116463	105262	127270	135308	215068	224061	142720	148180	126416	124593	138688	159117	208757	219333	176490	184655	181636	184168	195762	183951	219594	179508	194202	219660	174587	163371	159561	146911	178026	195080	179399
51	tr|D9ZGG2|D9ZGG2_HUMAN	Vitronectin OS=Homo sapiens OX=9606 GN=VTN PE=4 SV=1	1.44688e+06	1.37123e+06	1.0608e+06	1.07709e+06	1.01924e+06	1.04282e+06	1.50687e+06	1.51189e+06	1.34149e+06	1.40508e+06	1.26862e+06	1.33107e+06	1.1737e+06	1.12451e+06	891825	882923	1.11112e+06	1.12322e+06	804389	738834	1.46848e+06	1.47944e+06	1.27564e+06	1.30223e+06	1.1039e+06	1.09991e+06	893570	908738	1.75891e+06	1.65984e+06	992491	1.11837e+06	1.23359e+06	1.23133e+06	1.22964e+06	1.14417e+06	1.52739e+06	1.38552e+06	1.48613e+06	1.46656e+06	2.00321e+06	1.92703e+06	2.00363e+06	1.86404e+06	1.83253e+06	1.43674e+06	1.33789e+06
52	sp|P22792|CPN2_HUMAN	Carboxypeptidase N subunit 2 OS=Homo sapiens OX=9606 GN=CPN2 PE=1 SV=3	199983	175261	178103	196556	83842.4	86269.1	137289	136789	147972	149625	119482	120971	130710	123349	139595	136168	69071.9	71838.1	146006	148499	190012	196750	124111	126642	103107	107308	131423	134900	93684.9	102480	175044	185971	182899	181069	173140	150967	127325	113806	148780	171392	126525	119824	116614	103998	115354	156196	151382
53	tr|V9HWF6|V9HWF6_HUMAN	Alpha-1-acid glycoprotein OS=Homo sapiens OX=9606 GN=HEL-S-153w PE=2 SV=1	4.07298e+06	3.96201e+06	2.58893e+06	2.8303e+06	3.43239e+06	3.01223e+06	3.55945e+06	3.72284e+06	1.72715e+06	1.64038e+06	3.15217e+06	2.90891e+06	2.03989e+06	2.05089e+06	2.0246e+06	2.20776e+06	1.68667e+06	1.67558e+06	1.53899e+06	1.526e+06	2.64376e+06	2.62447e+06	5.20303e+06	5.08471e+06	1.72202e+06	1.58655e+06	1.83673e+06	1.85066e+06	6.11878e+06	6.20125e+06	3.7993e+06	4.12844e+06	2.70343e+06	2.81616e+06	9.75137e+06	9.1919e+06	8.31074e+06	7.2339e+06	3.95395e+06	4.31773e+06	8.76041e+06	8.5269e+06	9.72578e+06	8.94294e+06	1.0122e+07	1.08143e+07	1.09129e+07
54	tr|Q86U78|Q86U78_HUMAN	Angiotensin 1-10 OS=Homo sapiens OX=9606 PE=2 SV=1	14593.1	12255.2	7664.11	6172.92	3737.28	334.529	770.286	1117.5	12751.5	13925.6	5338.47	4534.21	583.173	379.329	1794.01	705.749	3845.41	2816.46	3328.26	5168.42	7960.29	9205.79	5178.17	6118.55	1173.06	1321.92	5184.9	9108.96	12948.7	11433.7	8856.52	9801.92	7225.56	7638.72	12826.6	11180.9	6977.64	4999.09	8860.51	8229.6	6058	7402.74	6464.53	6631.48	8862.41	6730.11	7214.32
55	sp|P07996|TSP1_HUMAN	Thrombospondin-1 OS=Homo sapiens OX=9606 GN=THBS1 PE=1 SV=2	72256.4	68517.9	70754.1	75891.1	32279.6	32980.5	31617	25400.8	45220.5	54786.6	47028.1	29841.6	80940.2	80588.3	70026.1	93577.8	45564.8	38247.4	60503.1	70176.1	131233	134883	40803.7	33832.8	31710.4	47969.9	39434.3	39625.5	25884.7	31993	60172.7	68355.6	115075	109932	28534.1	29100.8	35315.6	31552.2	46177.2	59639.1	36326.2	24855.5	32915.6	33027.4	30173.3	61704.6	43745.1
56	tr|B7Z8Q2|B7Z8Q2_HUMAN	Alpha-2-HS-glycoprotein OS=Homo sapiens OX=9606 PE=2 SV=1	1.24697e+06	1.32428e+06	1.22642e+06	1.24163e+06	1.27436e+06	1.28711e+06	1.41188e+06	1.22498e+06	1.64766e+06	1.67999e+06	1.27647e+06	1.34873e+06	1.90384e+06	1.83145e+06	1.46463e+06	1.64894e+06	1.43742e+06	1.46684e+06	1.53969e+06	1.56978e+06	1.16979e+06	1.30275e+06	1.92609e+06	1.97064e+06	1.77833e+06	1.57427e+06	1.73313e+06	1.81583e+06	1.72426e+06	1.67257e+06	1.99276e+06	2.3832e+06	1.35823e+06	1.30346e+06	925121	859591	1.32115e+06	1.04865e+06	803670	877950	633822	536952	596821	590993	569937	645751	833795
57	tr|A0A140VKF3|A0A140VKF3_HUMAN	Testis tissue sperm-binding protein Li 70n OS=Homo sapiens OX=9606 PE=2 SV=1	82150.4	80520.3	88369.1	98074.8	122799	145524	97903.5	86153.1	99300.5	102971	114536	101844	110453	104958	92399	62978.5	106001	99376.3	85599.1	85941.6	120467	128686	125596	121744	88482	84196.3	111614	117778	122724	139624	118397	130536	111609	111722	135657	116639	155036	142995	85831.3	88343.9	158084	136318	130901	124925	120404	148967	144217
58	tr|Q8IZZ5|Q8IZZ5_HUMAN	Coagulation factor XII-Mie OS=Homo sapiens OX=9606 PE=2 SV=1	206951	139162	94536.2	98888.9	98799.5	111329	138046	136396	85581.5	84368.6	121105	122470	108377	107445	101435	96359.2	99879.4	92446.4	112857	156435	196357	195306	99918.2	104856	104836	100548	110836	83030.5	193652	146479	154841	170781	160105	168024	104174	124376	183810	156410	130359	131833	38648.3	43362.5	49107.3	47056.6	51146.1	43776.5	46605.8
59	sp|P02760|AMBP_HUMAN	Protein AMBP OS=Homo sapiens OX=9606 GN=AMBP PE=1 SV=1	324363	307495	560221	667349	338489	356676	342787	333475	302151	259943	302549	311468	389124	332005	292191	220512	254072	243092	336681	261617	388910	306196	275086	329717	188908	247299	292948	358696	289940	295876	396353	420605	476198	448119	564157	528343	511726	465077	415443	575986	383103	344982	343395	358023	370683	397670	453235
60	sp|Q96PD5|PGRP2_HUMAN	N-acetylmuramoyl-L-alanine amidase OS=Homo sapiens OX=9606 GN=PGLYRP2 PE=1 SV=1	94205.6	86316.2	80582.9	86550.9	123695	115997	102585	106524	109247	115624	73797	76316.2	135776	128001	70873.1	61455	71701.6	72342	98090.5	107478	112899	113530	62273.1	70984.6	125610	133558	89149.4	96165.5	147831	135160	79603.8	77019.6	139496	148141	78504	71290	95818.6	83020.5	97258.6	104642	41264.4	29675	30385	36140.7	33789	26995.8	21809.5
61	tr|A0A0A0MRJ7|A0A0A0MRJ7_HUMAN	Coagulation factor V OS=Homo sapiens OX=9606 GN=F5 PE=1 SV=1	27593.2	24008.1	19613.9	24000.8	13182.1	13545.3	13291.6	20749.2	13652.5	15239.5	17771.9	19316.6	12663.4	12480.9	8293.64	6963.18	5070.6	7862.05	12306.3	11833.9	15609.3	17170.9	6145.53	9981.43	11955.1	12719.6	12053	6862.23	19480	19600.4	19319.2	19712	18437.2	15319.9	16872.5	21645	20080.5	20596.5	17023.9	13536.3	23304.3	17411	28165.3	22165.4	30797.5	17849.5	23756
62	tr|V9GYM3|V9GYM3_HUMAN	Apolipoprotein A-II OS=Homo sapiens OX=9606 GN=APOA2 PE=1 SV=1	2.50873e+06	2.12811e+06	2.04237e+06	2.22335e+06	1.14515e+06	1.14295e+06	2.71787e+06	2.68714e+06	3.57787e+06	3.43615e+06	1.57944e+06	1.60653e+06	2.88439e+06	2.93359e+06	2.326e+06	2.73418e+06	3.21367e+06	3.43519e+06	2.40474e+06	2.73243e+06	1.83773e+06	1.75069e+06	2.49928e+06	2.17679e+06	2.50402e+06	2.66647e+06	2.2867e+06	2.23144e+06	2.94441e+06	2.87633e+06	2.23812e+06	2.67001e+06	2.15204e+06	2.02257e+06	1.44139e+06	1.47271e+06	2.21504e+06	1.9338e+06	1.86695e+06	1.71906e+06	680939	583153	572834	411797	451849	884429	872215
63	sp|O43866|CD5L_HUMAN	CD5 antigen-like OS=Homo sapiens OX=9606 GN=CD5L PE=1 SV=1	100076	86677	176877	180468	140565	147796	91573.6	68092.2	102750	105424	156409	199770	156742	127257	96247.8	74011.7	34033.3	35586.7	112421	110767	65538.9	85050.5	151722	152419	141022	132029	159480	174559	41757.3	46006.6	97097.6	104926	158448	180501	119193	95729.2	105241	114627	103598	102310	94531.3	82666.1	79023.7	77127.4	89722.7	92831.6	76287.5
64	sp|P0DOX3|IGD_HUMAN	Immunoglobulin delta heavy chain OS=Homo sapiens OX=9606 PE=1 SV=1	48663.6	54695.8	15113.5	15818	18464.2	18809	64514.7	61517.2	55705.9	32752.2	14691.3	14326.4	17172.5	15635.6	8661.53	7824.99	8128.13	6956.63	21549.7	19768.5	63595.6	69299.3	111132	116877	193276	187445	119283	125911	13575.1	11064.2	17120.7	12228.5	36320.8	38795.2	16119	20053.7	41244.6	22578.5	14544.5	7681.3	11550.9	13127	10778.4	8635.78	11010.3	30007.8	29754.5
65	sp|P02671|FIBA_HUMAN	Fibrinogen alpha chain OS=Homo sapiens OX=9606 GN=FGA PE=1 SV=2	33951.4	20396.1	36586.6	46403.2	35248.9	31486.9	22442.2	31365.8	24530.2	34394.9	27124.6	31233.1	17106	22298.9	19498.7	20800.8	17631.3	14310.1	21510.3	27682.8	35214.1	26306.4	25349.7	18056.7	26280.8	19803.8	15868.4	22672.5	40589	42395.7	25521.9	37075.9	35520.9	28323.5	47138.3	35810.3	32093	40130.6	26595	22602.5	41841.3	33467.9	32439.1	33170.8	34032.8	46172.7	37870.4
66	sp|P07357|CO8A_HUMAN	Complement component C8 alpha chain OS=Homo sapiens OX=9606 GN=C8A PE=1 SV=2	83871.9	72986.3	126049	128949	85928.7	96769.6	95130.4	109363	67705.6	71387.4	116211	108625	99745.7	106205	99924.2	107828	59661.3	58626.6	83066.7	90393.2	104980	109608	142318	139390	95708.2	92505.1	106057	110188	98160.7	95464.5	100627	106835	138859	138996	112337	109355	174881	150142	135669	144291	104307	104230	104332	120928	92842.2	130558	91938.1
67	tr|A0A3G1HEF1|A0A3G1HEF1_HUMAN	Mutant serpin family A member 7 OS=Homo sapiens OX=9606 PE=2 SV=1	100326	68577.3	98887.1	83640.4	87986.9	124097	93878	97290.7	75115.8	65920.2	113631	85379.4	116418	91183.5	93279.8	77546.6	55607.6	60521.4	77995.3	93505.4	113952	109950	72232.5	90524.1	76366.3	86617.2	64220.7	76179	148454	124822	141449	140180	113800	126821	94564.6	96657.4	164448	87756.7	109309	107975	121251	57411.8	119678	102246	104198	134199	137411
68	tr|B2R815|B2R815_HUMAN	cDNA, FLJ93695, highly similar to Homo sapiens serpin peptidase inhibitor, clade A (alpha-1 antiproteinase, antitrypsin), member 4 (SERPINA4), mRNA OS=Homo sapiens OX=9606 PE=2 SV=1	59105.8	51630.4	78947.5	87835.9	32520.5	29172.1	52603.2	58209.9	90430.7	93827	72906.7	60865.3	94700.7	84811.4	79121.8	67808.5	54968	58059.3	77402.5	68252.5	134221	129811	51228.2	51602.4	90137.9	95630.2	90068.6	90596.5	74106.1	69328.4	97229.2	98449.7	102739	100066	42151.5	37122.8	44910.1	37974.1	55289	58457.2	32946.6	38481.5	40298.9	33345	31817	34114.9	45211.8
69	sp|P05160|F13B_HUMAN	Coagulation factor XIII B chain OS=Homo sapiens OX=9606 GN=F13B PE=1 SV=3	35716.3	31467.8	30878.2	28241.2	23720.4	26039.6	25509.3	20556.3	33979.5	33058.7	24963	21654.3	27465.8	22742.8	21761.4	28156.5	16766.9	11737.1	17844.3	21722.4	41634.6	47053.1	22802.5	24733.7	31352.4	24270.1	17618.3	18426.1	33169.8	30620.2	35349.3	35307	36775.1	35751.1	31642.1	28727.3	40958.4	34912.3	35152.8	36959.9	16673.5	21730.3	20057	18693	23188.7	23660.1	16909.8
70	tr|Q8TAY0|Q8TAY0_HUMAN	Insulin-like growth factor binding protein, acid labile subunit OS=Homo sapiens OX=9606 GN=IGFALS PE=2 SV=1	25697.1	26170.5	24881.1	31375.2	18119.4	15907.7	86458.3	85333	109124	128194	34271.1	26775.9	72081.7	77502.8	62202.8	53314	29298.1	33215.7	32814.8	44029.7	129020	128011	120979	112320	93889.8	88938.9	80961	92814.2	136596	133265	19751.8	16637.2	48311	43970.2	70807.9	61939.2	24142.4	20751.8	63668.9	62131.3	42983.5	34891	37338.2	38428.4	39257.1	32693.1	33928.8
71	sp|P27169|PON1_HUMAN	Serum paraoxonase/arylesterase 1 OS=Homo sapiens OX=9606 GN=PON1 PE=1 SV=3	231687	216428	272769	284393	144614	136792	262887	311088	358525	405418	268849	292820	287473	287913	157527	157178	171660	190406	212412	212237	208289	192270	408529	339564	305637	310225	239193	248742	254625	240630	234758	256832	275294	281182	339641	312081	221147	199939	349127	357466	198993	148955	165861	161144	193498	155600	117535
72	tr|B4DZ36|B4DZ36_HUMAN	cDNA FLJ58441, highly similar to Attractin OS=Homo sapiens OX=9606 PE=2 SV=1	36537.5	28648.2	33053.9	40292.2	37165.6	31562.4	34790.7	42315.4	33404.9	36650.8	30033.4	32502	40677.1	32836.4	25011.7	21014.3	28369.3	33316.7	37287.8	44598.5	30583	32269.1	31872.2	38330.2	40075.7	32274.6	29966.2	30170.4	47009.7	41239.3	58334.1	65650.3	47433.4	47499.8	28727.9	28370.1	43557.2	49262.5	45888.3	43416.5	15229.8	21612.4	15464.1	17058.2	31861.2	17572	20241.5
73	tr|G3V2W1|G3V2W1_HUMAN	Protein Z-dependent protease inhibitor OS=Homo sapiens OX=9606 GN=SERPINA10 PE=1 SV=1	32723.2	15985.9	27014.1	38965	17971.9	30729	30369.5	35404.9	22454.5	18678	32708.8	16098.6	62415.3	18201.6	87943.4	14597.5	28751.1	11068.4	23223.6	42635.2	29456.2	33721	28557.2	33338.3	27455.9	34662.3	22400.3	20165.3	23463.8	20734.2	38228.7	31685.7	46527.6	25837.7	34816.2	39541.2	44392.1	32143.2	34004.1	27523.1	51412.5	49979.1	49864.8	40553.4	47862.4	58956.7	47931.5
74	tr|Q5VY30|Q5VY30_HUMAN	Retinol-binding protein OS=Homo sapiens OX=9606 GN=RBP4 PE=1 SV=2	245296	548667	316044	365682	115015	96627.8	198817	192228	413138	393783	583922	603701	599991	615010	314299	254724	440753	459470	343402	344626	348273	306860	270194	128147	176746	174987	217422	224109	350937	720728	212247	270589	128398	130275	409913	172881	257543	111220	218273	150894	296619	684388	757692	173030	197544	176260	134560
75	tr|A0A2Z4LCH4|A0A2Z4LCH4_HUMAN	Corticosteroid-binding globulin OS=Homo sapiens OX=9606 PE=2 SV=1	136294	117099	126241	149591	84242.6	90198.5	90321.1	93556.3	168170	159081	130548	125752	127458	114678	117141	105152	103613	99034.6	135832	103289	140351	152554	104269	101692	123674	109483	99268.8	112838	154319	150093	120352	141759	114253	125721	87924.8	84855.6	120913	145937	132779	118864	93442.4	85181	103960	53971.2	56105.3	126242	104394
76	tr|Q68CK4|Q68CK4_HUMAN	Leucine-rich alpha-2-glycoprotein OS=Homo sapiens OX=9606 GN=HMFT1766 PE=2 SV=1	46971.4	47851.6	26732.5	31471.7	70645.3	71874.5	11765.2	1843.16	2899.26	6242.44	21648.7	21685.9	13750.9	7625.87	7566.88	4413.49	9088.86	5074.99	2188.86	2118.76	1924.05	1384.46	27883.2	28648	499.129	27381	43324.7	32220.5	31168	12477.3	28481.8	27928.4	16752.2	15799.4	84677.7	81093.8	32675.7	29962.9	7337.42	23015.3	3188.13	7573.28	157.84	252.22	3421.54	402.952	509.075
77	tr|A0A0S2Z3Y1|A0A0S2Z3Y1_HUMAN	Galectin-3-binding protein (Fragment) OS=Homo sapiens OX=9606 GN=LGALS3BP PE=2 SV=1	76754.4	64533.6	114610	122172	39223.9	41485.7	65756.6	64414	47692.4	48769.2	31384.8	25018.1	31555.8	20419.5	20582.5	17383.9	41793.6	42014.2	26939.5	17989.8	49066.1	42313.9	52435.9	60258.2	30088.8	33790.6	30956.1	29704	112759	107066	55244.4	62401.9	52406.7	64021.2	30772.1	32552.9	85390	89274.7	68644.1	73398.9	57934.8	51504.7	50680.2	53947.8	52795.7	44147.8	47380.5
78	tr|A8K1K1|A8K1K1_HUMAN	cDNA FLJ76342, highly similar to Homo sapiens carnosine dipeptidase 1 (metallopeptidase M20 family)(CNDP1), mRNA OS=Homo sapiens OX=9606 PE=2 SV=1	32443.3	26381.6	26380.3	21256	17197	15043.8	30650.3	24372.6	44595.5	31116.3	43282.8	43752	26173.3	20807.8	26993.1	23762.2	27266.5	32726.4	27572.2	34666.5	32077.2	42089.9	33485.9	27111.7	30672.1	32158.4	71212.1	25016.9	54471.8	42587.7	32287.6	30753.9	49929.3	37821.3	27820.9	41424.7	32823.9	32968.3	30555	23346	31944.5	28135.4	27383.6	30934.9	25578.4	30125.9	17172.6
79	tr|Q6MZX7|Q6MZX7_HUMAN	Uncharacterized protein DKFZp686M24218 OS=Homo sapiens OX=9606 GN=DKFZp686M24218 PE=2 SV=1	213452	195307	302700	304680	300740	318006	843616	806656	283022	297535	282833	288126	413329	374791	199170	216541	143762	144680	427524	415980	444822	464137	464608	493069	293588	294654	361748	406244	221036	213679	364674	432945	476501	457755	178636	187917	667940	599210	406700	433835	122956	115140	107359	115101	125843	402949	426368
80	sp|P18428|LBP_HUMAN	Lipopolysaccharide-binding protein OS=Homo sapiens OX=9606 GN=LBP PE=1 SV=3	22906.9	20135	23485.7	29483.3	55494	49700.7	71115.9	76810.2	32258	39974.2	156458	154924	41442.1	40697.4	40565.5	31689.8	41067.8	32469.2	43531.9	39451.1	45266.2	39702.5	98931	77056.8	81359	71930.4	54084.7	55321.5	121305	120574	86523.2	85960.6	37551.6	41876.3	100333	99842.1	98375.2	93214.8	50429.3	56249.2	249737	228750	229301	231309	244661	148767	112759
81	tr|I3L145|I3L145_HUMAN	Sex hormone-binding globulin OS=Homo sapiens OX=9606 GN=SHBG PE=1 SV=1	76535.6	76831	32241.6	43907.8	22202.4	25959.2	49625.3	53856.3	52152.5	44193.2	15117.1	16214.8	33834.5	23153.2	17374.8	16169.1	9899.98	14642.3	66351.7	76271.6	19968.7	16637.2	6208.05	6230.99	38500.9	40377.4	31009.6	26796.6	21312.1	16285.2	49330.2	71321.5	46567.9	45691.8	44149.3	37803.7	10176	5849.53	26618.7	34562.1	7046.06	4240.23	3616.03	4971.05	4441.83	10764	8420.87
82	sp|Q14520|HABP2_HUMAN	Hyaluronan-binding protein 2 OS=Homo sapiens OX=9606 GN=HABP2 PE=1 SV=1	60970.8	47953.4	41257.4	42597.6	32642	32736.9	43945.5	44729.6	33014.4	34891.5	49090	48342.9	31715.9	32793.5	32670.7	25020.2	29747.5	27455.8	34074.2	27664.7	59122.2	58100.1	41480.2	47149.1	14760.5	14865.6	31854.8	27937.4	54956.9	45999.6	60159.2	65892.8	50600.6	50086.5	56969.1	46455.2	72827.8	53272.5	59669.4	62010.9	65042.6	56453.3	70439.1	53443.8	60386.2	44265.8	40716.6
83	tr|D1MGQ2|D1MGQ2_HUMAN	Alpha-1-globin OS=Homo sapiens OX=9606 GN=HBA2 PE=3 SV=1	411730	382226	314577	333619	1.00778e+07	1.05248e+07	185523	173403	879254	878400	747020	722874	374970	367359	333503	344468	125204	119248	129927	143801	1.8013e+06	1.90715e+06	1.15155e+06	1.29135e+06	7.81755e+06	8.51718e+06	1.89842e+06	1.79059e+06	2.41487e+06	2.21971e+06	8.13618e+06	9.58415e+06	384375	376722	9.0063e+06	8.53438e+06	1.97533e+06	1.83049e+06	297955	318972	735200	693700	742270	721893	759691	250653	241032
84	tr|E9KL36|E9KL36_HUMAN	Transthyretin OS=Homo sapiens OX=9606 GN=HEL111 PE=2 SV=1	54980.6	57353.8	54378.8	52821.5	28476.4	28795	48002.6	67157.2	91758.9	81833.6	50376.6	52927.2	113733	115921	82094.4	93460.5	66288.6	60598.2	87423.7	80064.4	137249	137977	77851.4	78235.4	99232.7	106747	124291	139815	104203	87530.7	62379	62732.7	42108.7	27550	54355.8	42784.7	57404.4	50574.2	93081.5	104855	62275.9	50215	50094	52339.5	71362.6	57877.8	41392.7
85	sp|O75636|FCN3_HUMAN	Ficolin-3 OS=Homo sapiens OX=9606 GN=FCN3 PE=1 SV=2	113425	106180	64882.9	68425	51740.7	54031.5	50187.7	56898.3	68584.5	69674.7	77528.6	83961.3	100732	102227	67369.7	78467.3	70116.8	68301.2	28974.9	37044.2	110536	115721	100559	102763	62256.1	58595.4	94669.1	92414.7	183922	185908	92815.9	105839	99739.8	103869	64743.6	58544.9	114105	105350	109664	114531	70846	54236.2	54691.6	45178.8	62356.7	73495.7	77086.8
86	sp|P80108|PHLD_HUMAN	Phosphatidylinositol-glycan-specific phospholipase D OS=Homo sapiens OX=9606 GN=GPLD1 PE=1 SV=3	47214.3	41433.9	32876.9	40072.1	19250.6	25143.4	49246.2	42823.1	26334.7	33512.8	39668.8	40510.3	46722.7	44752.4	33821	26616.4	18054.9	24787.5	22967.6	27225.7	61298.8	56296.2	35566.4	34472.5	29059.5	26695.2	41773.4	44809.6	37223.1	35070.2	52619.4	47815.7	48450.5	51881.2	24211.8	25715.6	48593.9	19698	31986.9	36482.4	22352.3	16644.7	18570.2	14079.9	13767.6	32320.6	13623.8
87	tr|V9HWP0|V9HWP0_HUMAN	Pentaxin OS=Homo sapiens OX=9606 GN=HEL-S-92n PE=2 SV=1	261014	249286	324662	346988	157046	154229	389598	394985	225929	232909	139654	131959	192621	151015	182318	161747	61941.3	48959.9	179974	172184	262718	266112	197029	170565	153970	163626	150313	152334	403797	293555	350127	373421	311818	305170	390371	356084	354669	320266	388219	405512	460048	423810	430681	436182	456867	530898	493797
88	tr|A0A384N669|A0A384N669_HUMAN	Lumican OS=Homo sapiens OX=9606 PE=2 SV=1	47962.9	31320.4	100249	96942.6	168023	169629	68596.9	59728.5	77844.6	94587.9	112533	115890	107466	102743	110859	70920.2	62632.1	79599.9	128696	124313	90600.2	79389.9	63868.6	60444.3	76962.9	84194.8	38514.1	43720.1	75307	77985.7	111543	112885	102662	97703.8	96119.7	96249.4	80937.5	90226.8	58705.6	67000	29933	25483.4	24340	28676.1	25368.4	57973.2	49725.5
89	sp|P01591|IGJ_HUMAN	Immunoglobulin J chain OS=Homo sapiens OX=9606 GN=JCHAIN PE=1 SV=4	213435	216095	371791	393564	420293	407882	241492	245493	346387	352283	408350	445998	365698	370286	310190	312532	152522	144558	388526	372367	173729	184546	465294	441891	297955	266372	439784	491384	91356.6	72347.8	392712	433873	402771	384025	243682	252763	370896	326853	529663	585541	398710	372022	380060	343209	303141	1.11408e+06	1.09185e+06
90	sp|P19652|A1AG2_HUMAN	Alpha-1-acid glycoprotein 2 OS=Homo sapiens OX=9606 GN=ORM2 PE=1 SV=2	968883	972641	304414	341011	537318	526450	537137	551880	538824	595540	531506	559453	657609	657114	543544	502691	425342	394053	248097	246485	960402	967767	1.25821e+06	1.26729e+06	492678	496960	571447	579295	587562	546480	830436	833042	660858	655648	1.30433e+06	1.2051e+06	1.25284e+06	1.11379e+06	489492	550176	1.7334e+06	1.61237e+06	1.73814e+06	1.88194e+06	1.89526e+06	1.95717e+06	1.89021e+06
91	tr|A0A3B3IQ51|A0A3B3IQ51_HUMAN	Complement factor H-related protein 2 OS=Homo sapiens OX=9606 GN=CFHR2 PE=1 SV=1	14937.2	16996.8	20929	25367.3	18327.8	18312.4	20952.2	24425.3	6494.11	12609.9	14784.6	18468.4	3972.85	3854.17	19058.7	17599.4	11614.6	7332.81	11835.3	10919.4	15906.8	21477.2	16297.8	12033.5	16428.8	14574.7	12574.8	14002.3	22218	24648	12546.8	14876.6	23545.2	19619	34614.4	32699.3	30721.8	30984.3	21229.9	19230	30058.1	28899.9	28873.2	17072.6	22159.7	32114.8	40315.3
92	tr|B2R888|B2R888_HUMAN	Monocyte differentiation antigen CD14 OS=Homo sapiens OX=9606 PE=2 SV=1	26912.8	29273.6	15462.6	15119.8	14721.1	15043.8	25747.2	23978.9	10728.8	12241.6	58493.2	52696.7	16176.5	14812.3	8292	12473.9	11463.1	11791.9	16584	21886.1	17805.6	16054.8	21424.9	21676.3	16743	16775.2	19059.3	16738.1	29103.4	32508.6	33501.9	42291.9	24249.5	18318.9	49939.6	46895.5	71560.4	63830.8	22505.8	22068.4	41149.2	32117.5	30038.4	35664.3	28683.2	45320.1	41507.3
93	tr|Q2KHQ6|Q2KHQ6_HUMAN	APOL1 protein OS=Homo sapiens OX=9606 GN=APOL1 PE=2 SV=2	62020	48693.8	87692	95891.9	28293.1	27799.3	93232.6	78173.6	124532	124619	52534	52498	93908.3	98450.6	51632.7	38797.8	55977.3	60653.5	39418.7	37897.5	112385	100027	125016	118707	53953.3	42547.3	71336.1	71980	114004	111165	65574.8	67978.6	61828.2	74097.2	57943.6	60189.8	50088.1	46885.9	92150.5	86312.9	28224.7	22033	25679.4	23600.2	27598.4	35418.8	29615.7
94	sp|P23142|FBLN1_HUMAN	Fibulin-1 OS=Homo sapiens OX=9606 GN=FBLN1 PE=1 SV=4	12143.1	14033.2	26729.9	28294.9	28620.2	26415.3	29295.7	32531.2	23200.6	16810	23789.4	15850.1	18817.9	15394.3	11881.3	9291.28	10657	12750	23575.4	16833.1	14826.1	14461.5	16345.8	15932	17048	19190.1	13855.9	13282.4	11944.4	12447.1	34363.7	40464.4	25062.2	27207.5	32167.3	28060.6	47136.8	40267.2	20582.3	27117.3	8300.23	9547.54	7308.71	5214.39	8684	20678.1	15045.7
95	tr|D6R934|D6R934_HUMAN	Complement C1q subcomponent subunit B OS=Homo sapiens OX=9606 GN=C1QB PE=1 SV=1	84742.3	78025.6	128221	138359	130430	120413	197767	202238	108498	110772	180468	156121	144239	123920	170023	178475	74169.8	66757.2	143005	129984	182974	197249	149929	149954	110608	103062	140235	141076	165308	132298	188328	192653	193421	176201	231425	206975	171264	158759	132354	148562	103808	92582.8	94528.3	88690.8	99801.5	152055	141578
96	sp|P07360|CO8G_HUMAN	Complement component C8 gamma chain OS=Homo sapiens OX=9606 GN=C8G PE=1 SV=3	24417.4	28562.9	35642.7	43781.6	28327.2	33414.7	42919.6	38056	28152.9	24562.8	42790	33302.9	36800.2	32541.9	35350.9	38634.6	21486.5	18561.5	44374.3	37095.1	49264.3	43476.6	51431.3	53680.2	31222.3	30894.5	38391	45406	31990.9	34677.2	31712.9	39896.6	44754	35020.3	39367.1	36670.8	49191.7	54482.6	43237.6	57778.1	39278.5	37856.4	39216.6	39746.6	34215.3	33543	30934.5
97	sp|O95445|APOM_HUMAN	Apolipoprotein M OS=Homo sapiens OX=9606 GN=APOM PE=1 SV=2	462879	434102	252152	249671	137514	137349	265163	273903	282415	321376	139449	150263	347935	388381	262371	251075	245939	236572	284204	308726	366285	377700	282098	282872	294128	277784	277568	285338	364328	333687	189090	202622	193036	194651	277661	281780	122815	100768	311734	329677	164581	159768	153453	152589	162017	180265	154605
98	tr|C9JF17|C9JF17_HUMAN	Apolipoprotein D (Fragment) OS=Homo sapiens OX=9606 GN=APOD PE=1 SV=1	102149	105113	137733	130695	55064.4	58981	82837.7	70276.2	83261.7	82474.9	82367.2	93293.3	142065	142412	114982	100677	192543	150845	136988	134990	186770	162685	88206.9	80117.7	127710	121060	131855	148200	161577	165032	71538.9	93116.6	62115.9	87377	147874	155513	102603	73971.4	100559	66936.7	39885.2	33641.3	32926.7	29957.4	26358.9	49421.7	50119.5
99	sp|Q96IY4|CBPB2_HUMAN	Carboxypeptidase B2 OS=Homo sapiens OX=9606 GN=CPB2 PE=1 SV=2	37031.8	41499	52285.9	63499.2	35835.9	34821.2	37720.4	37151.5	38089.1	38445.9	48260.5	40811.9	47770.2	43596.2	60185.1	57789	34874.1	40834.7	47282.4	40329.7	70928	76972.3	44606.1	40940.9	51494.8	42272.9	52580.1	42123.6	48165.4	46741.7	49764.8	53951	66135	61060	47650.9	43368.9	45507	32088.7	54182.5	64942.7	47043.7	40950.8	44128.9	45911.4	46593.4	48423.4	39691.7
100	tr|A0A024R930|A0A024R930_HUMAN	Proteoglycan 4, isoform CRA_a OS=Homo sapiens OX=9606 GN=PRG4 PE=4 SV=1	12700.2	13786.5	12452.3	17110.3	5249.53	6473.92	19979.8	18569.4	10521.2	9671.07	4313.24	7740.39	6844.76	3285.18	10620.5	13795.3	10180	3453.66	10914.3	10563.8	9631.42	11248	8507.98	11825.4	12846.4	10927.1	6906.82	5263.98	12995.4	11518.4	11853.2	11360	11081	10130.4	11578.7	12288.9	13880	6584.31	19114.2	18727	18009.8	13115.8	14588.4	14147.7	17331.6	13153.8	10081
101	tr|V9HVY1|V9HVY1_HUMAN	Fibrinogen beta chain OS=Homo sapiens OX=9606 GN=HEL-S-78p PE=2 SV=1	9443.04	9519.59	11315.6	15603.4	10367	7155.73	13398.3	14517.7	11115.7	10918.4	15505.1	14202.4	10542.7	8922.92	10198.6	3833.41	5888.96	10517.3	10614.1	11012.1	10761.8	10362	8431.2	14644.9	5235.2	8931.25	7762.72	7678.61	8605.89	10515.6	12924.3	10228.9	19141.7	10730	6615.49	6064.57	17462	24391.9	9142.36	7367.78	21607	18127.7	20494.2	12895.8	13527.8	19051.2	23585.4
102	tr|Q6N030|Q6N030_HUMAN	Uncharacterized protein OS=Homo sapiens OX=9606 GN=DKFZp686I15212 PE=1 SV=1	661713	737516	713994	714224	522206	762373	941257	934533	283331	363993	843808	804610	342508	297514	467290	512640	166468	138183	443059	340578	684955	732210	508861	207790	1.41043e+06	1.0963e+06	644034	543876	438686	497906	251123	519034	368974	365027	458296	415376	703780	673639	448903	229702	289241	259319	247407	94454.2	95571.3	670065	665305
103	tr|A0A7S5C360|A0A7S5C360_HUMAN	IGH c2510_heavy_IGHV1-18_IGHD3-9_IGHJ4 (Fragment) OS=Homo sapiens OX=9606 PE=2 SV=1	2021.85	1671.23	1072.45	1033.64	1833.79	1928.63	446.998	1576	405.694	458.762	1379.16	1441.73	584.528	2323.2	527.67	230.248	1357.02	2400.58	600.32	921.825	524.098	152.869	1589.34	1825.75	3523.19	1754.94	1037.49	1567.7	1335.64	1186.38	972.419	1863.44	130.313	1966.64	78.9911	197.667	576.651	745.006	1836.51	1333.37	350.465	401.224	396.369	128.508	547.16	3771.33	2652.53
104	tr|Q9NPP6|Q9NPP6_HUMAN	Immunoglobulin heavy chain variant (Fragment) OS=Homo sapiens OX=9606 PE=2 SV=1	124427	122946	64089.5	64954	68095.1	70594.3	269998	263804	112578	113894	111383	114158	111491	104109	51466.8	68932.4	30854.8	35139.5	69269.9	75861.2	103292	95392	134526	106166	95599.8	92645.9	169370	176111	53809.7	46566.5	106908	115629	97230.8	91304.9	63824	55652.1	127318	109564	256631	198378	59616.8	47088.8	42097.3	43311.9	55396.5	214712	187188
105	tr|Q8WVW5|Q8WVW5_HUMAN	Uncharacterized protein (Fragment) OS=Homo sapiens OX=9606 PE=2 SV=1	29663.5	23276.6	7829.38	8926.5	10479.4	15396.3	14685.6	11302.4	7798.1	10438.9	18511.7	12974.3	13763.5	19985.1	10067.4	15035.7	11694.7	6834.57	7298.5	9806.1	12906.2	12412.8	9248.16	11983.1	15383.1	11611.9	11702.3	12841.4	19584.2	11717.8	23929.2	19694.3	20048.1	21034.4	20656.4	18585.3	15137.8	11512.5	27174.5	27072.7	19630.1	24124.9	16113.3	40756.5	20277.4	37275	12246.2
106	sp|P20851|C4BPB_HUMAN	C4b-binding protein beta chain OS=Homo sapiens OX=9606 GN=C4BPB PE=1 SV=1	74578.5	69837.8	53614.6	56605.2	43143	49939.5	60891.7	59638.5	32568.1	32834.7	37413.8	39107.3	42561	40644.2	46020.5	46929.6	29827.4	20630.7	42009.3	42060.6	58776.9	65806.9	50471.1	50975.2	31003.2	31533.3	37494.1	40642.5	70991.9	53349.5	69983.7	71842	59793.9	64131.4	79258.3	75282.4	77223.4	67281	72638.3	75007.6	43696.7	31850.3	40016.9	35529.9	42080.5	49213.7	52208.5
107	tr|E9PHK0|E9PHK0_HUMAN	Tetranectin OS=Homo sapiens OX=9606 GN=CLEC3B PE=1 SV=1	27540.3	34575.8	35182.5	37759.1	40168.9	27070.4	38161.1	15452.1	27631.3	28526.2	38876.1	38035.1	58574.5	53757.5	21481	33834.6	18967.4	25527.2	34513.8	49990.9	36626.4	69248.7	17862.1	37719.6	20912.7	41733.6	49352.2	46754.8	56626.6	55367.1	21020.7	42575.6	48407.5	41042	33451.3	32009.8	33236.9	38031.4	17483.7	37445.7	13433.4	8727.37	9547.11	7946.63	9256.39	30571.2	27986.2
108	tr|B2R5G8|B2R5G8_HUMAN	Serum amyloid A protein OS=Homo sapiens OX=9606 PE=2 SV=1	3878.81	10473.9	38567.1	42607.8	5229.22	5422.18	9387.07	13844.1	15756.9	12667.6	3493.78	2811.65	4263.58	9274.64	1386.61	1323.61	280.709	534.504	1086.13	6832.39	3312.69	2262.71	17648.1	18563.9	1872.73	825.838	10700.6	8542.53	8869.91	10441.6	14228.8	12276.2	28656.1	26472.6	19039.2	16964.1	12407.3	8225.72	18303.5	19970.9	4989.84	4871.72	6400.78	5294.13	5233.14	10095.6	9842.59
109	tr|Q5JVE7|Q5JVE7_HUMAN	Coagulation factor X OS=Homo sapiens OX=9606 GN=F10 PE=2 SV=1	71247.1	75424.9	65431.1	84271.9	59018	34195.9	48816.2	70357.2	42230.9	37942	76323.4	79968.9	28538.9	64627	27988.5	28316.4	22409.6	25666.5	50635.6	71551.7	92034.8	89789.9	36549.1	25442.8	52534.2	47100.5	50779.7	58228.3	68520.4	60862.9	83949.9	100724	48038.8	78179.9	59686.2	43985.8	65186.8	102625	74233.6	22546.1	62736.9	61776.4	58890.1	54378.1	65584.9	95485.7	58448.3
110	tr|C9JEU5|C9JEU5_HUMAN	Fibrinogen gamma chain OS=Homo sapiens OX=9606 GN=FGG PE=1 SV=1	8733.81	7095.88	13995.4	12830.6	7067.25	8652.44	22605.2	12515.1	10644.4	7742.25	14722.5	12669.4	5009.83	13258.5	10156.6	10211.8	6008.96	6307.34	11545.6	11611.7	15782.1	5930.5	12783.6	14366.4	10321.4	7041.02	17539.9	9805.18	12749.8	9095.1	8535.66	8539.44	12345.7	11690.7	13519.3	11923.1	22860.8	16968.7	6627.16	7618.89	28291.6	27471.7	24782	26740.8	30611.6	40823.5	43819.7
111	sp|P02741|CRP_HUMAN	C-reactive protein OS=Homo sapiens OX=9606 GN=CRP PE=1 SV=1	6310.36	4944.58	32485.9	37856.4	12924.6	25241.8	87458.5	90451.6	10286.2	12672.6	45763.4	48875.3	10542.6	24191	8971.09	7141.39	7132.03	9772.86	11168.6	10402.6	3379.6	10577.8	137204	140803	28217.5	14124.5	14729.2	23993	41795.6	34202.4	111293	114127	14710.7	10051.2	319961	277631	133983	139739	73878.5	82625.4	553322	504290	521589	471323	549589	426350	362999
112	tr|A0A5C2GBW7|A0A5C2GBW7_HUMAN	IGH + IGL c595_light_IGKV1-5_IGKJ4 (Fragment) OS=Homo sapiens OX=9606 PE=2 SV=1	9944.25	11148.6	6098.43	7448.81	17299.1	17731	21342.3	26356.9	20820.6	20696.1	7833.43	7132.89	11886.3	11056.6	7280.69	10054.4	6201.3	6215.77	17693.9	15825.5	12721.8	14841.9	13504.8	13953.7	19445.3	18077.1	8262.62	6649.25	4858.4	6088.43	7386.48	8338.02	10019.9	11661	8628.19	6771.78	15143.8	12477.9	14895	14678.8	4272.31	3878.4	4089.12	4928.3	3877.92	16504.6	15600.4
113	tr|Q1HP67|Q1HP67_HUMAN	Lipoprotein, Lp(A) OS=Homo sapiens OX=9606 GN=LPA PE=4 SV=1	17648.2	16999.7	13917.2	12804.7	26980.1	25042.4	127550	129642	42294.6	25974	55569.6	67739.8	34050.9	23936.1	13589.6	13153.4	8066.03	6330.48	14754.5	21002.1	41483.6	46795.8	28413.5	24080.6	11557.9	8188.37	11331.7	17742.6	120698	114963	37626.6	38498.4	153780	162374	159447	141272	39322	22207.1	17970	15802	13654.8	23104.2	6271.29	20276.4	12554.7	22687.9	15224.9
114	tr|A0A7S5EXS5|A0A7S5EXS5_HUMAN	IGH c2028_heavy_IGHV1-69_IGHD6-13_IGHJ3 (Fragment) OS=Homo sapiens OX=9606 PE=2 SV=1	3651.92	3963.76	34794.9	17348.5	1633.3	6846.5	1854.24	9102.61	4913.3	11490.9	2424.5	5171.12	7740.42	9950.03	3155.5	4302.76	2063.99	2408.27	4449.9	9880.35	2379.11	3286.15	4293.05	2916.57	7379.21	10892.7	2549.83	6868.88	6479.07	2688.25	7021.95	3173.95	1024.47	4235.2	4147.83	1970.45	5991.66	9703.39	4465.19	6484.99	11978.3	10266.5	7009	8924.48	5723.01	14071.2	7625.39
115	tr|B0YIW2|B0YIW2_HUMAN	Apolipoprotein C-III OS=Homo sapiens OX=9606 GN=APOC3 PE=1 SV=1	81907	62572.8	279584	209889	122907	120786	122267	122330	98695.2	103364	171954	169663	175378	168254	160439	146759	151120	164641	114852	100471	202726	189217	73376.3	74448.6	140850	135312	118476	115287	160453	149997	171160	172307	259339	283981	156638	142070	219799	204409	205320	224073	147850	148299	177249	149326	147851	183685	161539
116	tr|A0A5C2G4D8|A0A5C2G4D8_HUMAN	IGL c4168_light_IGKV3-15_IGKJ2 (Fragment) OS=Homo sapiens OX=9606 PE=2 SV=1	544.034	730.689	293.394	507.25	1873.65	2293.57	616.752	4568.18	1978.01	1879.65	1542.2	2429.44	1346.02	1841.49	422.178	1198.9	1042.92	170.628	451.635	843.577	1903.76	286.134	1494.65	1861.52	990.732	445.062	485.845	2365.71	892.748	1289.77	535.539	1340.05	969.43	746.688	864.107	282.522	2663.58	2195.34	375.994	2493.63	450.029	400.312	197.772	742.038	988.815	541.059	489.28
117	tr|A0A140VK24|A0A140VK24_HUMAN	Testicular secretory protein Li 24 OS=Homo sapiens OX=9606 PE=2 SV=1	18843.4	16282.9	14997.5	15379.2	9479.6	10766.1	13338.5	13310.2	10753.5	8239.09	7675.01	11032.7	12903.2	11018.4	13032.6	12815	7810.38	9406.61	10147.9	9937.25	19203	17798.2	12590	13563.6	11013.3	12226.8	11339	9785.6	24459.1	21065.4	17055.6	18534.9	22530.3	23812	16857	16180	24160.2	18059.3	15039.8	19168.1	11658.8	9838.44	6819.26	7893.11	8354.39	8859.04	7783.73
118	tr|Q53HP3|Q53HP3_HUMAN	C3/C5 convertase (Fragment) OS=Homo sapiens OX=9606 PE=2 SV=1	26976.8	47124	47473.2	49308.7	31368.2	27408.1	63456.3	67477.4	22951.8	26610	59081	64663.4	46664.2	42324.8	44595.3	39839.2	16103.4	13366.6	48219.6	44190.4	58811.9	39355.8	24547.6	23971.5	27898.7	28644.4	19391.4	46645	85578.6	76119.5	80678.7	87068.1	72948.6	68362	72878.9	66349.2	110142	98850.6	62161.4	65367.1	45588.2	38989.3	42511.7	23608.4	40330	51398.4	44736.8
119	tr|Q53GU8|Q53GU8_HUMAN	Transforming growth factor-beta-induced protein ig-h3 (Fragment) OS=Homo sapiens OX=9606 PE=2 SV=1	9225.78	3636.73	4629.07	6164.71	2829.02	3875.11	2651.53	6294.63	6815.2	3014.34	3973.07	9337.7	6301.05	8408.79	4246.76	2986	2642.76	3288.75	7113.36	10514.4	8701.95	6364.07	5170.49	6996.36	3306.64	6561.93	8654.94	6111.95	7873.99	6605.86	17999.3	17046.6	7554.31	4812.22	5699.68	5990.27	11050.8	9063.81	10387.9	10030.8	5893.14	5958.13	2879.25	6785.76	6234.06	10890	8607.82
120	sp|P43251|BTD_HUMAN	Biotinidase OS=Homo sapiens OX=9606 GN=BTD PE=1 SV=2	10882.5	10367.2	12595.4	16123.5	8410.34	10047.2	18300.2	5215.84	15941.6	15832.4	18307.5	16971.3	12570	18248.9	17823.5	22020.8	16876.3	14463.2	11542.5	16172.8	25755.5	26721.2	15940.5	14820.4	19707.2	15350	18732.3	19754.9	20929.5	17308.3	18391.8	18696.1	20299	23068.4	14945.3	9866.25	15929.5	12604.2	13704.5	16530.1	8967.57	11896	8348.34	8532.52	10907.4	6686.58	6759.29
121	tr|K7ER74|K7ER74_HUMAN	Apolipoprotein C-II OS=Homo sapiens OX=9606 GN=APOC4-APOC2 PE=1 SV=1	163264	194957	373262	439701	135725	110724	225638	224364	110682	114161	264073	265191	275915	301369	439527	528298	260785	229843	150687	143021	195217	190322	132975	127902	192680	199729	121721	128158	147376	156516	163318	183665	240643	242079	132093	120574	103047	104162	287327	250948	182170	178189	218799	166566	161513	183274	226594
122	sp|P00739|HPTR_HUMAN	Haptoglobin-related protein OS=Homo sapiens OX=9606 GN=HPR PE=2 SV=2	473794	62173.7	452595	111437	61446.4	481168	578218	169579	549507	210118	70863.9	65632.6	189118	189654	304731	346856	46862.4	46209.6	51653.7	454011	105198	116739	185076	184553	387761	46256.9	119563	516313	153077	162030	25828.3	20393.8	62430	68660.4	83478.9	77508.9	424277	43712.8	111785	126747	240963	245405	270700	168293	37602.3	192300	182183
123	tr|A0A5C2G0W4|A0A5C2G0W4_HUMAN	IGL c2799_light_IGKV3D-20_IGKJ2 (Fragment) OS=Homo sapiens OX=9606 PE=2 SV=1	70786.5	62118	46776.3	50765.6	111295	125401	128644	141713	140483	131490	74877.5	67895.5	62044.4	54665.5	41909.6	44088.9	21550.3	22647.2	62642.5	73044.8	102096	101012	55257.6	52414.8	80240.8	74021.1	82516.1	83263.2	30995.8	31665.1	83420.3	91653.4	112522	116071	37218.1	39439.7	145509	115627	93959.1	104022	31194.9	28764.6	29079.3	26407	34674.6	87856.3	87451.8
124	tr|A0A7T0PWY8|A0A7T0PWY8_HUMAN	Immunglobulin heavy chain variable region (Fragment) OS=Homo sapiens OX=9606 PE=2 SV=1	1813.99	820.287	1668.07	769.374	4058.99	5176.81	8381	4785.47	11669.8	8451.24	3343.26	2388.08	6806.6	4126.96	873.121	1778.31	3642.47	2524.74	3653.62	7877.17	5371.18	5349.36	12309	10649.2	2871.36	905.084	5328.46	8804.64	4170.53	3707.87	7729.8	8589.93	4009.19	3182.85	7462.33	4959.37	4784.73	5140.44	8417.71	9492.4	1386.99	1380.8	454.046	945.384	2839.24	3225.91	1090.82
125	tr|A0A087X1J7|A0A087X1J7_HUMAN	Glutathione peroxidase OS=Homo sapiens OX=9606 GN=GPX3 PE=1 SV=1	28479.5	31571.1	31541.7	32182.8	18574.7	18423.7	44039.4	46442.4	23901.4	22460.3	44135.4	41958.3	47638.8	43562.7	21128.5	17077.3	23836.5	29479.8	35219.3	38322	52646.2	54985.8	38674.5	38190	31191.3	35402.9	44875.6	44436.9	59365.9	59399.3	75186.8	80456.8	46166.4	47814	24727.4	26499.2	77506.6	66651.7	67884.2	75421.6	49201.3	46244.4	48129.2	50045	53369.2	36050	36132.2
126	sp|P15169|CBPN_HUMAN	Carboxypeptidase N catalytic chain OS=Homo sapiens OX=9606 GN=CPN1 PE=1 SV=1	35873.7	32342.3	32592.1	46726.6	23714.2	40698.9	34675.5	30970.8	38765.8	35802.3	32727.3	50700.6	43424.1	41898.9	35543.4	32932.7	19944.4	26389.6	33595.8	30068.9	36408	39985.1	34324.2	37644.6	31404.9	28693	25098.2	35702.8	44722	51342.5	38865.9	45149.9	32613.9	40949.5	40708	35158.9	24986.3	37513.9	29383.3	34006.3	36879.9	30649.7	32160.2	40043.8	37948.5	37417.7	27746.9
127	tr|Q8N5F4|Q8N5F4_HUMAN	IGL@ protein OS=Homo sapiens OX=9606 GN=IGL@ PE=1 SV=1	743.786	2820.61	3873.12	17423.4	741.288	2169.05	40642.3	7972.24	26403.7	20384.5	18378	7276.96	1636.74	1968.91	27988.9	4250.78	12591.9	8904.8	18165.5	7158.68	8096.21	27586.2	18307.5	1191.66	23644.1	5163.16	2953.49	23498.6	22967.1	22319.6	1637.65	2506.1	19353.3	1799.11	2031.26	857.946	38265.5	22945.9	664.324	464.628	826.134	1619.16	8840.23	1057.27	1059.61	26551.3	40864.5
128	tr|A0A5C2GMC1|A0A5C2GMC1_HUMAN	IG c1308_light_IGLV6-57_IGLJ2 (Fragment) OS=Homo sapiens OX=9606 PE=2 SV=1	12781.1	12530	19214.2	8994.88	18002.2	2188.8	37938.2	37577.1	36566.4	34363.5	32714.8	28624.7	4980.42	8831.51	22767.8	19107.4	8860.8	9975.12	32771.1	10674.7	23445.7	24068.7	36677.5	38641.4	13327.6	12240.4	25737.3	30006.8	21851.9	16407	25043.1	26399.5	19078.9	20124.4	35846	32541.5	44859.9	36287.7	34399	36187.8	22829	18632.3	19639.1	15530	17950.7	48455.1	46442.4
129	tr|K7ERI9|K7ERI9_HUMAN	Apolipoprotein C-I (Fragment) OS=Homo sapiens OX=9606 GN=APOC1 PE=1 SV=1	125116	119435	72909.7	72831.5	32992	62402.9	62060.7	57882.3	65927	67204.9	52525.2	53288.2	215385	223201	344039	376171	232199	233932	131848	131457	238759	241861	149606	154812	165927	168637	333126	338329	65862	55591.6	81398.7	82857.3	61780.3	65172.3	103336	101514	60844	54424.8	94876.3	103247	34952.7	27634.8	26182.5	30186.2	39835.2	30911.1	24269.9
130	sp|P0C0L5|CO4B_HUMAN	Complement C4-B OS=Homo sapiens OX=9606 GN=C4B PE=1 SV=2	93119.3	87207.9	52714.3	66093.6	25143	30094	61186.4	66649.7	77762.4	77198.8	35476.7	43438	84392.5	83657.7	52391.1	57515.2	38829.2	39657.7	46693.7	48980.4	91694.8	91674.5	83487.1	95026.9	37101	32967.6	27636.6	32062	111788	100985	119414	118656	62890.1	73280.4	119798	110401	70008.3	62358.8	89902.4	112035	29011.9	29013.8	34231.2	31703.1	38616.1	39606.9	48968.5
131	tr|F8WF14|F8WF14_HUMAN	Carboxylic ester hydrolase OS=Homo sapiens OX=9606 GN=BCHE PE=1 SV=1	27686	19090.4	14361.1	12458.3	12124.3	14867.6	18197	20536.6	18685.6	18631.9	18275.4	31054.6	32117.6	30859.7	18604.2	23448.5	16047.2	17205.7	22071.5	24527.1	27268	27749.3	21591.8	22881.8	23715.7	16079.3	19111.1	22248.1	31235.5	37605.1	33787.4	37095.5	18122.6	23630.9	13626.9	13928.8	32023.9	21380.8	24148.6	23684.5	9901.96	4455.66	7476	14151.2	13608.5	7266.19	8374.96
132	tr|D3JV41|D3JV41_HUMAN	C-X-C motif chemokine (Fragment) OS=Homo sapiens OX=9606 PE=3 SV=1	144566	138269	140918	164202	80376.8	75075.7	167400	165680	119739	126729	55421.2	60509	120614	124820	147897	144368	82114.6	76947.7	124442	119231	165854	167853	98739.7	99572.6	110106	113420	75590.8	77124.8	45842.3	53524.4	78808	90568.8	105197	99608.9	60747.6	57704.4	69082.6	61745.5	94962.3	77004.9	74368.3	69982.1	66834.3	68073.8	59420.5	121355	115799
133	tr|A0A5C2G325|A0A5C2G325_HUMAN	IGL c2355_light_IGLV3-21_IGLJ2 (Fragment) OS=Homo sapiens OX=9606 PE=2 SV=1	9769.31	9959.81	11939.1	11962.7	18369.2	21246.3	21594.2	23205.2	14988	14950.8	16010.4	14139.8	12491.3	9459.51	13594.9	11106	11590	11336.2	12706.5	10757	11635.8	12444.9	24338.6	25697.6	17446.2	19475.5	16545.6	18249.6	15207.3	14411.6	27009.7	27731.2	23055.8	21061.3	13524	12122.2	21740.6	21130.5	16727.8	13454.7	6162.22	6294.89	4848.26	1944	675.085	13465.6	11621.7
134	sp|P01833|PIGR_HUMAN	Polymeric immunoglobulin receptor OS=Homo sapiens OX=9606 GN=PIGR PE=1 SV=4	11822.8	12231.2	4341.94	6523.91	5608.03	33905.9	6268.29	7410.54	14004.2	9399.61	9830.17	4773.17	6938.31	4691.73	11255.2	64709.3	9752.76	6665.77	6247.09	10186.8	6474.49	7863.56	8683.74	12649.4	6676.18	69737.5	6221.06	7778.87	6639.58	7433.29	6470.57	11867.8	5848.75	6482.04	7308.23	6896.69	5239.9	3873.8	8939.37	6929.86	19407.8	7586.03	18720.1	24577.8	9375.16	9263.67	21390
135	tr|A0A5C2GI81|A0A5C2GI81_HUMAN	IG c346_heavy_IGHV4-34_IGHD3-22_IGHJ4 (Fragment) OS=Homo sapiens OX=9606 PE=2 SV=1	11416.1	1499.1	3813.68	2109.43	1685.31	2138.88	7907.73	2581.14	4684.9	6432.79	6681.18	2866.55	3107.2	1086.15	78617.3	96820.4	3819.93	2506.04	5163.75	5689.37	5503.68	750.043	842.185	847.559	2492.49	6287.67	6299.73	238.939	915.045	1802.23	292.496	3747.19	5666.03	10029.8	108.842	736.736	7051.28	11355.6	6318.22	627.997	539.758	1031.19	1455.87	817.736	0	2596.13	5358.02
136	sp|A0A0B4J1Y9|HV372_HUMAN	Immunoglobulin heavy variable 3-72 OS=Homo sapiens OX=9606 GN=IGHV3-72 PE=3 SV=1	9628.27	12126.1	5337.34	4128.65	48784.4	48691.8	35709.9	40255.8	21030	23454.8	29977.4	26592.9	52771.4	55806	3169.16	5695.43	5269.54	5844.85	13291.4	14061.4	10512.6	6397.87	28993.3	24077.2	37291.3	36168.1	27274	26223.5	20885	14907.8	27348.5	35317.9	30702.6	25029.5	11073.3	9957.22	14493.7	10857.4	9900.27	14610.3	4872.29	5478.06	6541.6	5603.92	11795.2	15732.4	10822.7
137	tr|A0A5C2GL32|A0A5C2GL32_HUMAN	IG c152_heavy_IGHV5-51_IGHD6-19_IGHJ5 (Fragment) OS=Homo sapiens OX=9606 PE=2 SV=1	4921.81	4576.78	1687.81	2304.23	3619.73	4259.2	3193.48	2600.34	4078.91	3926.99	2937.17	776.635	7593.28	7921.36	3677.93	3881.15	1982.15	2030.58	1883.88	910.432	1210.02	4086.32	6059.31	3837.56	7374.56	6344.98	7095.16	7542.3	3008.44	2707.96	7842.12	7240.98	3544.97	1790.3	1165.05	3720.97	5842.77	2312.46	3403.72	4880.26	3755.43	665.648	4295.15	3454.24	1615.31	4421.47	3154.31
138	tr|F2RM37|F2RM37_HUMAN	Christmas factor OS=Homo sapiens OX=9606 GN=F9 p22 PE=2 SV=1	27124.8	8129.63	16772.8	19745.4	10019	10361.9	10805.5	9764.72	26015.8	30872.6	8269.57	8507.94	7472.38	24634.3	21960.9	5610.53	7962.99	7529.84	21290.1	6755.82	18962.4	15512.4	7813.86	27287.4	13780.1	23309.7	12547.6	12310.8	19432.8	10776.1	13700.2	16273.9	34296	22046	17967.7	12960.8	12714.7	30005.6	23347.2	25814.5	27979.4	22532.3	20317.7	19207.4	29142.7	14125.3	24236.7
139	tr|Q6N092|Q6N092_HUMAN	Uncharacterized protein DKFZp686K18196 (Fragment) OS=Homo sapiens OX=9606 GN=DKFZp686K18196 PE=2 SV=1	140717	135157	9190.29	6415.77	14600.3	16970.9	12340	14061.5	2337.59	1565.75	12265.6	10084.5	81647	83930.4	18100.5	15694.4	3161.42	1425.56	18810.6	18279.6	1553.3	1091.07	63885.1	2260.45	112145	137821	282762	361849	4266.36	3950.8	612.844	1117.61	432154	390458	25345	32524.2	78365.2	65884.9	62044.7	9622.91	81580	85332.8	106410	66540.8	75846.9	230196	295956
140	tr|A0A5C2G5A5|A0A5C2G5A5_HUMAN	IGL c3045_light_IGLV1-44_IGLJ3 (Fragment) OS=Homo sapiens OX=9606 PE=2 SV=1	6356.31	4038.21	11326.3	10634.5	6160.44	8333.68	7871.98	5568.08	8147.06	16512	4705.38	13490.6	7533.85	8793.03	7023.68	5656.41	3062.81	4986.02	4417.3	4818.59	12590.1	11619.3	15204.5	16555.9	7739.28	9668.88	6365.03	7892.56	12264.5	5933.13	10386	11510.4	16515.7	8254.53	6326.89	4872.42	17401.1	12082.2	7583.52	5804.58	5975.43	11088.5	10128.4	9379.15	6711.04	14683.2	14930.1
141	tr|A0A5C2G647|A0A5C2G647_HUMAN	IGH c42_heavy__IGHV5-51_IGHD3-10_IGHJ4 (Fragment) OS=Homo sapiens OX=9606 PE=2 SV=1	1416.18	1175.72	13504.8	2534.46	2053.6	1458.6	1005.92	432.714	926.971	2129.32	1690.06	2178.6	1089.15	1647.66	443.374	1003.67	222.768	752.469	1094.66	20664.2	2080.96	514.798	1221.53	522.258	2706.84	1867.3	10987.4	1880.88	8650.73	29401.5	3279.42	4407.77	15676.7	1131.4	1476.84	2001.72	1142.41	2070.02	883.884	3312.28	795.978	1077.52	553.098	536.151	3065.42	503.023	5818.88
142	tr|B2RA39|B2RA39_HUMAN	cDNA, FLJ94686, highly similar to Homo sapiens complement factor H-related 5 (CFHL5), mRNA OS=Homo sapiens OX=9606 PE=2 SV=1	3953.64	3945.27	4179.76	2686.44	2520.66	5731.47	4649.71	2809.4	8071.55	7309.2	2830.66	8221.4	3869.24	3816.7	4116.91	2198.82	2330.77	2039.48	3973.6	6375.94	3477.46	2770.29	5458.38	2038.52	3060.9	2307.38	3674.68	4061.88	4404.47	2193.38	5678.93	3068.2	5446.41	3135.5	3672.52	3005.69	4688.78	5870.32	2927.26	1770.19	3881	4086.51	3361.38	6609.21	2503.05	8621.33	4754.38
143	tr|A0A024R6I7|A0A024R6I7_HUMAN	Alpha-1-antitrypsin OS=Homo sapiens OX=9606 GN=SERPINA1 PE=1 SV=1	2.30626e+06	1.80432e+06	3.18418e+06	3.28048e+06	635852	619132	3.96153e+06	4.26148e+06	1.78162e+06	1.67522e+06	11815.9	11033.8	1.47593e+06	1.34929e+06	620478	609496	511971	524306	634845	593820	957698	1.01076e+06	1.99802e+06	2.12513e+06	651002	615114	1.42612e+06	1.36212e+06	1.68043e+06	1.77473e+06	1.91495e+06	2.06217e+06	14107	14045.1	3.51428e+06	3.47796e+06	2.3357e+06	2.11557e+06	1.15926e+06	1.29085e+06	2.51966e+06	2.2388e+06	2.21231e+06	2.60534e+06	2.53144e+06	3.21667e+06	2.91233e+06
144	tr|A0A5C2GG00|A0A5C2GG00_HUMAN	IG c1082_heavy_IGHV1-2_IGHD2-8_IGHJ6 (Fragment) OS=Homo sapiens OX=9606 PE=2 SV=1	1091.56	1779.99	580.285	483.889	597.834	2383.75	4412.65	2989.52	1699.28	452.918	615.421	4250.8	786.503	1043.97	653.913	306.257	404.232	596.329	312.907	893.309	379.2	390.876	178.747	181.164	572.561	1084.21	730.466	304.98	1356.62	145.688	747.022	409.051	534.03	2658.87	719.672	1120.31	514.788	181.74	1250.58	692.774	4337.97	3404.86	3018.23	3933.33	3564.03	4051.77	5100.36
145	tr|A0A5C2G703|A0A5C2G703_HUMAN	IGL c168_light_IGKV1-12_IGKJ5 (Fragment) OS=Homo sapiens OX=9606 PE=2 SV=1	28084.7	23408.1	46872.1	43625.2	55604	56575.2	58902.3	57845.1	45467	43549.5	20423.1	22712.7	27466.2	24956.3	17979.8	18319.2	10517.8	8599.82	38147.5	34184	30474.5	31616.2	34873.8	36516.6	49294.7	47166.4	34971.3	38435.2	18400	16212.9	28791.2	34650.5	56552.9	54555.4	37367.4	33751.6	47251.2	40794.3	43238.1	42103.2	15881.2	15452.6	15393.4	12770.4	18057.2	48347.3	43096.5
146	tr|A0A7S5BYZ6|A0A7S5BYZ6_HUMAN	IGH c49_heavy_IGHV1-46_IGHD3-10_IGHJ4 (Fragment) OS=Homo sapiens OX=9606 PE=2 SV=1	1845.8	1184.29	13339.1	16408.9	5837.26	7449.67	6842.76	7406.89	2528.13	4564.44	4101.28	4100.09	5110.24	6938.66	1475.08	4536.95	2342.31	2475.3	7955.02	3866.25	5748.13	4725.94	6208.67	975.963	5271.64	4872.96	4361.64	6896.73	9170.87	2411.3	2047.93	3856.87	7929.48	5788.27	2509.17	3636.53	991.927	5376.31	4446.99	6123.96	3052.52	1151.37	1457.53	2169.02	2906.9	15448.6	11604.7
147	sp|P02776|PLF4_HUMAN	Platelet factor 4 OS=Homo sapiens OX=9606 GN=PF4 PE=1 SV=2	71850.9	63915.1	75500.9	73737	26222.4	34631.2	70386.1	66305.4	58414.8	68582.5	41685.8	35228.7	80005.3	78642.9	78003.1	87234.1	32698.4	43533.1	59872.8	62361	104501	108871	45364.2	50935	65567.3	48143.4	44966.4	39984.6	29539.4	35743.8	58827.6	52810.8	58156.8	51114.1	53683.3	46825.8	41276.8	37755.7	61531.2	74341.5	54140.5	52052.8	47057.5	52015.7	54195.5	73026.9	72551.4
148	tr|H6VRG3|H6VRG3_HUMAN	Cytokeratin-1 OS=Homo sapiens OX=9606 GN=KRT1 PE=3 SV=1	9282.49	12310.1	21580.9	12232.9	7628.85	7741.28	19002.7	7829.29	10844.7	17156.6	8508.16	103729	17426.6	12234.6	27657.3	26936.3	6492.12	11271.1	9286.16	16579.5	36562.7	23077.8	20171.9	11560.1	10478.2	18220.7	16684.4	5404.63	9219.49	6900.01	3381.36	3421.74	19338.7	18149.9	30114.4	28022.6	11848.5	9207.83	13104.5	12892.8	8375.1	4077.1	6791.79	6731.31	2791.85	11297.3	8534.01
149	tr|A0A7S5EXG9|A0A7S5EXG9_HUMAN	IGH c1638_heavy_IGHV3-73_IGHD4-23_IGHJ4 (Fragment) OS=Homo sapiens OX=9606 PE=2 SV=1	1151.36	280.021	1408.09	485.287	787.663	1395.39	3249.26	5583.53	4911.59	3999.15	3374.16	2971.91	2465.86	3936.84	312.624	1577.65	450.182	3224.44	3543.78	2938.89	3528.08	4426.67	137.494	2954.19	2048.67	1731.98	2769.37	3330.94	1206.07	878.978	8173.04	9109.41	11175.6	11716.8	3861.26	3929.18	1715.29	2493.72	3726.27	4272.22	1609.95	1521.82	253.48	620.134	997.023	24100.2	22633.7
150	tr|A0N071|A0N071_HUMAN	Delta globin OS=Homo sapiens OX=9606 GN=HBD PE=3 SV=1	10095.5	8197.36	9339.49	10293.4	112091	109860	5791.42	12154.4	13252.9	19923.1	15486.3	10338.4	7032.19	6745.62	4464.84	5571.22	3442.82	5872.2	4127.39	3814.12	23069	22852.2	18917.9	17246.2	110505	108816	28217.5	28700.6	41397.8	39429.6	135326	143972	10744.4	12070.1	97173	94411.4	39867.3	39487.9	7694.42	5394.04	14213.1	12061.8	10070	10312.8	6291.68	8950.36	3894.88
151	tr|A0A5C2G016|A0A5C2G016_HUMAN	IGL c1880_light_IGLV3-1_IGLJ1 (Fragment) OS=Homo sapiens OX=9606 PE=2 SV=1	2164.66	4444.15	4811.63	3438.4	3581.06	4076.23	5298.13	3472.91	2824	4715.4	3020.1	1822.42	2690.02	3252.87	10305.4	8473.86	3526.61	2507.86	2562.6	1930.53	5366.46	3654.56	6011	10157.8	5232.15	6596.15	6330.38	3839.74	2701.96	2303.91	2751.13	4241.55	2693.24	5240.62	3767.29	2996.76	3054.13	2715.34	4674.06	5016.79	7971.36	8087.81	11203.9	6872.5	10170.5	10872.3	3738.67
152	sp|P0DJI9|SAA2_HUMAN	Serum amyloid A-2 protein OS=Homo sapiens OX=9606 GN=SAA2 PE=1 SV=1	1507.41	1683.06	2856.36	2485.53	1078.23	1425.5	4248.26	5439.54	677.322	2847.52	10484	3114.7	3090.27	2201.34	2459.14	1325.97	1632.87	1272	1708.66	2375.88	1817.77	1233.59	23542.3	21135.5	2018.71	2671.88	1754.02	2726.68	2885.71	871.159	1148.33	1314.27	3218.67	1236.93	17748.8	13376.5	33999.9	33323.8	247.708	1468.55	50689.7	46229	45367.6	41269.4	43537	27270.7	18382.3
153	tr|A0A5C2GSB1|A0A5C2GSB1_HUMAN	IG c1813_heavy_IGHV1-18_IGHD3-3_IGHJ5 (Fragment) OS=Homo sapiens OX=9606 PE=2 SV=1	3753.12	4566.91	10968.7	9777.4	7208.07	6057.61	12638.4	12607.2	8052.01	9114.67	9358.79	9155.95	6626.52	5678.17	4461.27	3172.67	2363.78	3107.6	6731.11	5062.17	4772.05	3981.49	7996.94	7946.3	4675.03	4783.44	5351.27	8392.57	2058.93	5127.51	8057.31	7095.69	10305.5	8884.54	6370.22	7136.98	8691.23	8809.06	11114.9	13465.4	4569.77	3297.5	1053.34	3257.67	4774.24	21494.1	18376.7
154	tr|A0A5C2GW41|A0A5C2GW41_HUMAN	IG c807_heavy_IGHV3-13_IGHD5-24_IGHJ6 (Fragment) OS=Homo sapiens OX=9606 PE=2 SV=1	2437.41	821.737	18225.5	20923.5	3444.95	5961.09	3548.21	2656.14	1708.58	4988.73	2171.69	3034.95	1499.9	4818.58	3747.09	19293.3	2655.73	438.066	3015.87	5205.17	1484.97	2499.39	2097.62	760.605	4183.08	3492.23	3092.18	5136.37	324.179	1259.73	2377.99	1485.54	2621.42	572.539	2712.97	2611.02	1824.56	1241.08	6118.15	16203.1	1336.26	2347.02	1432.49	3001.65	3157.2	2082.62	1571.26
155	tr|A0A5C2GD14|A0A5C2GD14_HUMAN	IG c725_heavy_IGHV1-18_IGHD6-6_IGHJ4 (Fragment) OS=Homo sapiens OX=9606 PE=2 SV=1	4958.39	208.595	10777.8	9622.37	8284.04	10145.5	13170.7	5235.32	14826.8	21179.2	6236.57	6893.6	12534.6	10925.2	7231.28	4929.18	676.774	2392.56	15615.1	15835.5	14027.1	10092.5	11313.6	10949.5	12713	13036.2	17809	18154.5	5571.96	659.215	21109.9	11077.9	19353.8	15673	6178.91	6251.3	11629.8	15371.3	13407.2	14281.4	1130.16	774.759	1650.88	2501.91	658.7	15580.7	12501
156	tr|A0A5C2G5G7|A0A5C2G5G7_HUMAN	IGH c246_heavy__IGHV2-26_IGHD3-10_IGHJ4 (Fragment) OS=Homo sapiens OX=9606 PE=2 SV=1	2701.4	2502.11	8679.64	8140.82	10070.6	9670.32	3115.76	1198.74	5271.75	8693.43	17252	3251.92	4767.01	4680.95	4026.13	3121.03	2181.45	7334.63	7469.78	16417.3	5688.74	4620.68	10312.8	5700.95	20765.2	19020.5	15408.8	7829.11	14145.8	4699.64	30540.7	32207.9	9715.37	748.929	5574.11	4106.57	7193.45	3795.33	7493.03	5562.28	7906.49	5807.9	5407.04	9186.76	6409.97	15453.4	10364.8
157	tr|A0A024RAA7|A0A024RAA7_HUMAN	Adiponectin B OS=Homo sapiens OX=9606 GN=ADIB PE=4 SV=1	80048.3	71804.7	138172	149635	117971	120086	202244	203315	97220.5	106519	156804	160644	148723	141601	119390	110618	61874.7	57595.7	134137	129303	120972	123666	113297	109503	92825	94567.5	103505	108984	181226	166484	156901	167092	159129	161037	157270	150235	167287	159564	125100	138110	117285	98949.9	104598	102067	83950.6	175954	161954
158	tr|Q53GN8|Q53GN8_HUMAN	Macrophage stimulating 1 (Hepatocyte growth factor-like) variant (Fragment) OS=Homo sapiens OX=9606 PE=2 SV=1	14274.5	12904	8108.19	3080.89	15977.7	5547.88	15699.3	8782.91	12503.8	14275.1	15182.6	16392	18310.4	20275.2	17566.8	8648.18	14812.5	12119.8	8249.7	19934.9	7564.29	20863.5	7901.84	20533.2	2621.55	15476.9	16871.2	21510.4	23023.8	22341.7	20403.7	19203.4	4905.75	20029.2	6121.61	11143.5	20847.6	12494.9	15128.7	17733.1	15145.6	8082.85	8245.86	10073.1	14430.8	10856.8	12526.4
159	tr|A0A5C2GJP9|A0A5C2GJP9_HUMAN	IG c1141_heavy_IGHV3-49_IGHD3-10_IGHJ6 (Fragment) OS=Homo sapiens OX=9606 PE=2 SV=1	1310.17	949.444	986.807	798.874	4051.56	4090.51	1644.22	2242.56	866.763	201.7	276.388	1033.24	2026.38	1753.72	293.539	174.197	492.196	239.633	443.491	168.012	347.002	1200.23	1318.1	114.319	1127.95	116.716	1318.96	296.249	1514.4	838.482	6417.35	6998.89	797.797	998.134	419.084	357.22	2284.2	2307.11	166.751	329.062	295.767	199.593	138.701	331.378	183.933	980.752	243.115
160	tr|A0A5C2G980|A0A5C2G980_HUMAN	IGL c396_light_IGKV2-28_IGKJ4 (Fragment) OS=Homo sapiens OX=9606 PE=2 SV=1	1472.73	1385.72	1973.06	9254.02	522.55	2162.06	764.796	2297.86	2351.5	605.739	681.586	357.326	1041.87	403.944	553.974	16516.2	538.842	1558.48	1815.18	1266.03	2869.49	857.897	1312.47	3359.99	6092.83	436.758	3968.84	2614.05	1689.02	3638.64	524.374	1270.75	4708.1	8249.9	581.077	459.696	319.985	1298.43	1299.18	4375.88	676.252	290.892	350.767	1191.93	1460.06	1011.13	2026.54
161	tr|A0A5C2GAV5|A0A5C2GAV5_HUMAN	IGH + IGL c222_heavy_IGHV3-48_IGHD3-10_IGHJ4 (Fragment) OS=Homo sapiens OX=9606 PE=2 SV=1	297.702	198.348	230.07	138.288	264.497	220.853	530.938	372.791	372.063	310.213	0	327.774	209.465	299.362	784.525	766.913	180.185	286.725	0	254.841	83.2328	468.999	145.529	157.124	95.1049	100.841	222.113	562.387	394.046	163.035	2535.17	2449.96	2204.6	1365.89	180.179	93.2954	372.271	247.445	228.773	440.082	386.658	131.494	391.181	651.348	314.66	1155.39	2575.69
162	tr|A8K430|A8K430_HUMAN	Fructose-bisphosphate aldolase OS=Homo sapiens OX=9606 PE=2 SV=1	6633.36	2797.75	1310.8	1218.91	1354.46	2351.49	2130.24	2472.41	3818.1	2625.95	61530.5	64017.8	2909.83	3099.15	1693.04	4337.71	1083.19	1922.49	2737.96	2617.89	1376.26	3362.54	2386.42	5650.62	1637.58	2191.76	2735.16	1772.99	1852.68	3295.41	6849.87	11218.5	2925.68	2957.78	2434	1623.18	7234.54	2172.58	3635.34	4658.49	4464.85	5977.69	7153.26	3838.49	7953.38	4269.38	3558.79
163	tr|A0A5C2G2F8|A0A5C2G2F8_HUMAN	IGL c3478_light_IGLV2-11_IGLJ3 (Fragment) OS=Homo sapiens OX=9606 PE=2 SV=1	8481.3	9035.73	27920.3	26445.9	24909	16060.1	8446.29	12105.2	11107.2	13509.4	22728.2	25703.2	33515.8	10851.2	9368.37	5415.04	5319.7	4399.18	13124.5	843.727	12754.9	14321.8	29128.2	40695.5	9187.82	12934.4	15331.2	13724.7	12588.1	1309.98	14848.4	18569.4	28023.6	26714	10575	6400.36	23299.9	21241.8	17917.7	17386	22509.2	18963.5	19515.1	15650.4	22099.9	79274.7	74203.4
164	tr|A0A5C2GFF7|A0A5C2GFF7_HUMAN	IG c500_heavy_IGHV3-23_IGHD6-19_IGHJ4 (Fragment) OS=Homo sapiens OX=9606 PE=2 SV=1	4258.84	3004.33	3108.52	5742.97	4441.05	2441.71	15428.2	15288.4	7809.95	10223.6	3991.19	4218.15	2011.2	3672.08	1857.31	2570.8	3102.14	1272.33	9025.67	8297.17	14581.4	14343.7	8390.07	8294.65	9255.73	4875.31	10287.2	9654.13	1552.91	2067.93	6294.22	4949.07	9706.56	9453.12	10784.3	11248.5	9462.05	7426.05	9931.38	10747.1	1280.24	1456.95	880.437	1295.93	924.77	2011.55	3243.66
165	tr|V9HWE3|V9HWE3_HUMAN	Carbonic anhydrase OS=Homo sapiens OX=9606 GN=HEL-S-11 PE=2 SV=1	5611.29	3072.97	4663.95	4114.25	50586.7	53247.3	4484.66	2936.71	17127.5	8304.64	9089.48	4515.96	5472.99	4464.44	5915.78	4664.51	6801.34	1321.46	5242.44	7477.39	12571.5	15976.5	6955.55	8031.68	30492.5	27672.7	17967	18430.1	14920.7	13790.3	65483.2	72629.5	11655.1	4158.75	77913.3	71594	23135.1	10250.6	8923.04	3841.91	6568.94	3654.49	5795.72	9482.02	3862.72	2234.33	3523.6
166	tr|A8K4C2|A8K4C2_HUMAN	Sulfhydryl oxidase OS=Homo sapiens OX=9606 PE=2 SV=1	4749.25	2321.21	6410.15	4112.12	3035.95	2977.83	2574.77	4597.19	3577.35	3349.18	6988.94	1902.21	6205.05	7071.39	4454.72	3873.77	2186.44	3019.73	7030.32	5653.66	4024.2	6730.61	2893.82	4221.81	8098.8	8402.65	5725.24	5954.13	4202.39	7509.85	4200.58	6939.94	5191.88	6279.53	6464.49	4959.67	6367.03	6391.89	5606	4310.76	1010.34	2176.72	1908.05	2250.02	1924.07	3743.95	4102.81
167	tr|A0A182DWH7|A0A182DWH7_HUMAN	Selenoprotein P (Fragment) OS=Homo sapiens OX=9606 GN=SELENOP PE=1 SV=1	7638.69	9662.06	22199.8	15090.9	10403.5	11282	13227.1	19882.9	6892.9	16381.5	4542.54	5055.69	17952.8	16973.2	13049.7	13670.9	16024.7	13220.7	14701.2	5242.03	15917.1	15359	13365	989.231	11318.8	9611.09	14638.9	14496.5	18921.2	13004.8	26952.4	23586.2	25273.1	14638.8	7567.55	10441.2	19714	16306	14038.2	15763.8	7516.36	4923.95	6986.87	4033.82	7804.86	8238.61	11311
168	sp|Q9NZP8|C1RL_HUMAN	Complement C1r subcomponent-like protein OS=Homo sapiens OX=9606 GN=C1RL PE=1 SV=2	4180.61	13236.3	10123.3	8973.48	7749.59	9886.78	15493.8	13898.9	4480.7	5917.87	9755.58	9464.4	7212.63	7083.11	11095.6	8193.79	4864.61	6147.65	6336.32	4121.25	6937.6	9585.72	8794.04	8231.85	8699.61	7663.28	6404.26	3994.01	10017.2	8150.3	13269.5	10071.6	12829.6	7409.4	13716.5	11417.3	23226.2	19805.4	10905.7	16234.4	12653.2	14233.8	9009.02	10574.9	9654	19037.5	13157.8
169	tr|A0A5C2G8F3|A0A5C2G8F3_HUMAN	IGL c86_light_IGKV1-6_IGKJ1 (Fragment) OS=Homo sapiens OX=9606 PE=2 SV=1	25174.4	21503.4	48270.9	56659.7	54384.5	53906.3	75703	77209.8	33791	34053.4	22688.6	32048.2	37346.1	34488.5	21229.6	19992.8	13021.6	12210.6	51132.4	47906.6	36950.9	39853	40429.4	40830.5	57439.1	59457.2	29799.2	34615.2	14357.9	16366.4	36656.5	34997.7	45337.8	43491.7	14559.3	17248.5	62989.2	36480.2	39723.7	45145.4	16950.9	13730.4	11247.5	10812	12876.8	40923.3	41492.1
170	tr|A0A5C2GDM9|A0A5C2GDM9_HUMAN	IGH c71_heavy__IGHV3-7_IGHD4-23_IGHJ3 (Fragment) OS=Homo sapiens OX=9606 PE=2 SV=1	6377.65	7823.09	12113.3	8282.74	19142.1	24295.7	15792.1	17031.4	17320	19668.2	16178.6	22238.4	9175.24	5436.05	11461.4	7428.72	6605.13	6334.89	12987.9	9117.81	11739.5	11278.6	7509.27	14828.5	22169.6	14560.7	5589.27	8142.52	4731.83	9503.62	9580.44	8062.87	21927.6	17722.7	10764.5	11017.9	24760.1	25987.6	14239.4	14508.8	9335.15	5089.77	3536.24	7101.92	3788.73	30772.8	36302.1
171	tr|A0A7S5BYN9|A0A7S5BYN9_HUMAN	IGH c696_heavy_IGHV3-33_IGHD6-19_IGHJ4 (Fragment) OS=Homo sapiens OX=9606 PE=2 SV=1	129.861	103.61	510.735	91.4359	427.397	608.805	412.743	316.248	21119.2	21465	0	102.135	369.779	824.789	347.906	409.377	78.4299	224.597	329.169	0	410.344	344.687	187.304	152.336	96.3469	126.713	102.613	426.33	262.137	97.7371	83.7301	405.695	213.263	429.843	130.589	89.511	149.544	211.405	108.285	150.523	300.924	144.09	222.981	181.111	339.057	0	307.634
172	tr|A0A7S5C1D9|A0A7S5C1D9_HUMAN	IGH c2097_heavy_IGHV3-7_IGHD6-19_IGHJ6 (Fragment) OS=Homo sapiens OX=9606 PE=2 SV=1	17477.1	21683.2	14762.8	16233.7	23741	28075.5	53008.8	55285.6	26981.5	31191.8	21165.1	23835.6	17027.9	16603.5	13691.7	13167.7	10952.5	11904.7	16723.5	25800.9	17526.7	17882.4	24206.9	21355.2	24105	27344	28195.8	29626	16477.7	15591.1	4698.8	18809.7	33180.8	32919.5	18113.2	15268	30475.7	26921.1	22099.6	16785.7	2539.19	3377.97	3295.1	5936.31	1082.05	21262.8	19758.8
173	tr|E7END6|E7END6_HUMAN	Vitamin K-dependent protein C OS=Homo sapiens OX=9606 GN=PROC PE=1 SV=1	19866.1	15081.9	15523	17679.3	9064.43	12296.7	11200.6	19102.8	9826.8	13284.8	13716.2	10212.6	12617.4	13005.7	23040.8	21035.8	12010.5	12677.4	14613.5	21595.2	16224.5	16581	11394.6	16354.6	12016.9	9485.15	15655.9	11357.1	13776.3	12725.3	15340.4	15193.5	24122.5	22774.5	13508	12316.4	15362.6	12642	21511.6	28174.7	11982.7	12983	13238.5	10720	12242	12767.7	11023
174	tr|A0A024RAG6|A0A024RAG6_HUMAN	Complement C1q subcomponent subunit A OS=Homo sapiens OX=9606 GN=ADIC PE=4 SV=1	21234.9	18484.7	44075.1	54317.5	29397.6	29834	49114.9	45997.2	30816	19571.4	40478.1	43544.1	35505	32342.5	37096.1	26873.3	12948.3	13556.1	29230	37999.9	33776.5	28434.7	29932.1	30733.6	26647.2	25487.2	31871.3	28771.6	44135.4	45625.3	42652.2	48324.2	51792.1	49649.2	46069.8	40091.4	57258.1	55744.8	33284.6	35156	29411.2	27735.9	29851.2	23956.2	30091.5	51651.4	51419.2
175	tr|A0A7S5EUH6|A0A7S5EUH6_HUMAN	IGH c2176_heavy_IGHV4-4_IGHD3-10_IGHJ4 (Fragment) OS=Homo sapiens OX=9606 PE=2 SV=1	6803.41	6525.29	6003.29	7405.04	8917.95	6257.15	18344.2	19451.1	15062.7	19114.9	5834.47	7450.95	4236.69	6350.96	6786.13	8775.44	7765.85	5112.74	11346.9	12462.4	11022.7	9406.21	4191.27	9329.61	11274.7	11571.1	9485.45	11152.3	9560.42	10612.5	8388.82	8953.28	15633.6	15671.2	7673.99	10206.6	27658.5	20224.2	11918.9	13939	5223.55	1425.05	2446.64	4048.91	2935.73	13236.2	17171.2
176	sp|Q15485|FCN2_HUMAN	Ficolin-2 OS=Homo sapiens OX=9606 GN=FCN2 PE=1 SV=2	3642.86	2971.18	5506.77	6538.8	4441.65	4698.39	3444.25	7286.65	8065.26	8399.05	5102.96	3746.43	7270.86	4866.26	3818.1	3908.63	3579.9	2085.47	7926.24	5472.94	6387.57	5530.42	4205.66	9929.91	2843.25	2435.55	4039.44	831.409	1117.5	1603	6832.54	5638.2	2385.12	7080.47	5716.74	5269.27	4986.52	5538.34	4130.67	4177.48	3185.19	5856.9	6356.73	2002.88	2959.85	4371.37	4748.94
177	tr|A0A5C2H1D3|A0A5C2H1D3_HUMAN	IG c716_light_IGLV1-40_IGLJ3 (Fragment) OS=Homo sapiens OX=9606 PE=2 SV=1	11320.2	11376.7	56948.1	47609.2	19084.6	17633.1	14211.8	14580.3	9740.7	14880.7	19304	15987.6	14047.5	13657.1	16193.7	16354.9	6830.11	5640.2	22088.2	24252.5	14065.1	7546.87	23447.7	27684.2	18853.2	16744.8	11948.3	7008.77	27076	29160.2	11398.4	11740.8	16662.9	12666.5	16034.4	16178.7	31092.8	29440.4	16230.4	17066.3	27955.2	24710.4	25391	28643.6	26888.5	50478	47206.1
178	tr|A0A5C2G7M3|A0A5C2G7M3_HUMAN	IGL c3685_light_IGKV3-11_IGKJ4 (Fragment) OS=Homo sapiens OX=9606 PE=2 SV=1	36410.1	29549.7	35182.7	39613.9	49222.6	48652.3	74453.1	71890.8	52468.7	55944	37754.2	37468.8	32243.8	27820.8	11673.7	13611.7	4453.98	13268.3	96831.1	92715.2	34397.9	33474.1	51020.1	52297.3	63985.7	64581	39773.2	41293.7	18692.8	17858.5	44959.1	44421.1	46854.8	44082.1	22159.5	20118.1	57927.1	50754.2	29755.3	34046.7	19003.6	13942.6	14648.6	13101.2	15725.5	30731	29405.1
179	tr|A0A5C2FVG1|A0A5C2FVG1_HUMAN	IGL c889_light_IGKV2D-28_IGKJ2 (Fragment) OS=Homo sapiens OX=9606 PE=2 SV=1	2592.57	191.379	6147.23	694.388	5767.48	4876.57	1340.99	2068.51	5541.92	7449.19	5325.51	2357.91	4649.07	584.284	1634.71	17228.8	4432.54	693.688	9827.1	1303.14	685.491	1674.23	1064.52	5698.56	1242.93	951.298	10944.7	1551.49	29362.5	50817.9	1865.31	523.056	799.434	845.547	3489.8	828.4	497.018	1705.17	1531.77	3148.79	1430	1925.43	474.188	2186.78	3765.56	2107.41	1249.32
180	tr|B4DI57|B4DI57_HUMAN	cDNA FLJ54111, highly similar to Serotransferrin OS=Homo sapiens OX=9606 PE=2 SV=1	29217.6	27441.8	557841	607494	21772.5	22842.4	23681	23119.2	21973	22445.1	40233	10092.8	521515	532290	5555.72	5862.57	14769.8	10907.5	25149.3	27197.4	74700.6	75798	20388.9	19996.5	29883.3	30145.8	19268.5	17701.6	9487.95	27762.5	22861.4	15096.4	29565.1	33910.2	13005.6	16624	30938.4	21341.9	17140.6	20515.2	13829.2	7346.63	15535	15821.9	13054.8	3270.51	16556
181	tr|A0A5C2FZN7|A0A5C2FZN7_HUMAN	IGL c2406_light_IGKV1D-39_IGKJ1 (Fragment) OS=Homo sapiens OX=9606 PE=2 SV=1	413.56	777.71	1014.32	1032.36	1216.8	608.787	318.562	4903.32	493.273	1680.74	2286.33	527.904	2922.15	2875.54	1133	201.219	238.109	218.698	2053.82	1194.87	1505.51	1993.59	2891.91	1763.78	1018.86	2574.98	1644.24	2726.21	309.092	412.201	2755.92	2793.87	3603.21	1093.98	2205.1	1602.98	597.898	2383.85	2776.09	3557.83	555.064	387.102	403.754	497.153	346.297	1644.01	2872.76
182	tr|A0A5C2GD32|A0A5C2GD32_HUMAN	IG c1121_heavy_IGHV1-18_IGHD3-22_IGHJ4 (Fragment) OS=Homo sapiens OX=9606 PE=2 SV=1	3418.22	3712.75	1830.33	1291.14	679.102	1891.98	8133.54	6179.19	7334.54	1900.01	4102.18	7967.25	3516.41	862.039	4865.77	1635.94	667.601	2395.14	1486.5	659.313	2068.67	15628.7	1801.3	11774.2	1468.4	2120.54	687.582	1392.87	2788.57	1240.8	3261.89	1300.74	6478.99	2085.25	6251.41	5564.43	6217.02	4051.92	4641.5	1059.02	326.443	1169.54	416.46	941.036	6869.84	1040.28	661.473
183	tr|A0A4P8J548|A0A4P8J548_HUMAN	IgG4_IGHV3-7 (Fragment) OS=Homo sapiens OX=9606 PE=2 SV=1	9919.29	8616.47	16857.2	18392.6	7396.66	6194.8	17120.5	18752.7	32160.8	32880.6	6093.85	5765.67	13442.1	8528.77	3862.32	4421.24	5600.71	9134.17	16877.4	12436.8	30422	27836.5	12402.9	16692.6	16107	15803.6	17950.6	15425.5	14342.6	14438.6	22651.7	21976.6	40228.6	42545.7	6288.4	6716.5	34013.3	28717.8	16077.3	19034.5	5527.91	1671.11	4799.43	2838.35	1753.88	5660.08	3315.4
184	tr|A0A7S5C0T8|A0A7S5C0T8_HUMAN	IGH c1220_heavy_IGHV3-7_IGHD3-3_IGHJ4 (Fragment) OS=Homo sapiens OX=9606 PE=2 SV=1	1119.58	1443.63	1081.32	489.66	1175.87	617.13	3288.79	3909.31	4466.17	4540.08	982.649	2169.81	2943.9	1894.22	279.657	2826.76	1079.37	697.257	2721.91	1534.99	1481.95	2700.09	1533.64	1171.16	1327.66	1514.84	2451.71	3045.11	553.432	1096.21	2431.36	1714.27	2420.6	3311.41	1061.39	484.676	6708.48	3171.59	4402.85	5524.2	1074.41	1975.6	1206.04	1445.25	851.482	17595.4	18413.9
185	tr|A0A5C2G4A9|A0A5C2G4A9_HUMAN	IGL c1133_light_IGKV3-20_IGKJ1 (Fragment) OS=Homo sapiens OX=9606 PE=2 SV=1	1635.96	1530.67	4491.52	1067.12	5450.66	4721.82	5690.64	763.148	852.352	357.655	3295.71	2266.32	805.767	840.624	1027.33	787.625	839.975	304.155	1048.73	194.789	2180.26	3105.23	2718	2574.65	996.242	1066.75	401.073	1970.6	1187.14	2253.2	1676.95	208.499	6001.89	6281.64	834.994	137.487	2416.77	12052	2600.85	2216.38	1709.29	311.13	1149.12	250.921	1557.2	5856.51	4680.09
186	tr|A0A5C2G8S1|A0A5C2G8S1_HUMAN	IGH c324_heavy__IGHV4-39_IGHD5-24_IGHJ2 (Fragment) OS=Homo sapiens OX=9606 PE=2 SV=1	973.226	313.784	534.957	1062.48	379.885	130.24	1021.99	3688.08	829.937	338.471	2936.35	2310.81	256.267	1002.85	752.514	20922.9	483.284	151.302	1898.77	156.571	1160.87	932.324	2425.58	1724.39	3628.49	3386.23	135.556	1473.73	498.711	1372.09	4087.71	5371.92	452.642	1467.66	145.216	4786.93	2421.27	2284.62	2359.76	2115.16	886.352	255.106	949.874	4375.27	855.212	9065.61	8946.91
187	tr|A0A5C2GJR3|A0A5C2GJR3_HUMAN	IG c601_light_IGKV1D-33_IGKJ3 (Fragment) OS=Homo sapiens OX=9606 PE=2 SV=1	1144.11	539.622	571.915	276.572	2093.24	6668.8	4218.15	2782.3	3287.98	4640.13	3403.25	2549.39	1132.17	3154.22	9310.72	445.484	577.697	347.689	2011.52	2082.54	318.7	1833.42	1569.48	2663.22	2264.85	3490.8	1920.9	3111.98	4493.81	2769.9	3340.75	1466.41	7085.08	7105.29	2774.12	4148.95	4717.15	6261.39	11693.6	12740.6	158.136	1812.94	352.253	2304.37	1874.7	3878.38	280.13
188	tr|A0A5C2GV81|A0A5C2GV81_HUMAN	IG c1689_heavy_IGHV3-23_IGHD5-18_IGHJ4 (Fragment) OS=Homo sapiens OX=9606 PE=2 SV=1	143.38	493.612	1515	429.082	884.461	475.648	890.154	229.328	291.325	1221.32	929.511	203.375	426.374	633.156	492.295	344.984	476.826	523.499	415.344	1102.47	881.539	1535.36	885.25	1446.22	695.655	120.721	1349.77	578.501	1134.32	1494.58	3481.65	5295.28	179.976	648.663	299.945	1676.12	1586.08	2557.97	1062.68	1785.16	480.977	142.962	590.161	375.103	409.477	2961.82	2992.23
189	tr|A0A7S5C336|A0A7S5C336_HUMAN	IGH c2465_heavy_IGHV3-7_IGHD1-26_IGHJ6 (Fragment) OS=Homo sapiens OX=9606 PE=2 SV=1	538.173	946.904	442.114	204.347	2705.78	2359.37	3844.62	582.048	1851.04	2708.72	1851.33	2826.37	1541.87	992.851	616.829	284.308	772.401	1471.63	1419.06	985.246	2531.6	3311.88	2958.72	3176.54	1626.58	1965.72	93.9119	504.52	1800.95	1819.87	2602.97	3767.87	471.131	7679.65	2387.57	1353.97	3645.65	596.299	2028.82	1532.24	367.703	1454.25	327.196	623.604	461.717	11912	6411.18
190	tr|A0A7S5C3B1|A0A7S5C3B1_HUMAN	IGH c3428_heavy_IGHV3-48_IGHD6-13_IGHJ4 (Fragment) OS=Homo sapiens OX=9606 PE=2 SV=1	1142.22	3742.49	4489.27	1741.72	2923.4	5959.31	8710.69	17434.9	5380.68	4441.71	2376.85	1922.14	1842.52	5130.59	4162.99	2732.84	3873.54	1811.14	887.949	1315.47	4372.78	1497.92	7416	4811.97	5409.84	4279.29	9145.01	8987.87	4337.09	4537.55	2389.05	7316.67	7515.64	7194.72	2710.8	5758.17	6903.77	9125.42	7979.07	11432	3434.22	3562.67	486.523	3033.81	3675.02	1949.77	1109.1
191	tr|F6KPG5|F6KPG5_HUMAN	Albumin (Fragment) OS=Homo sapiens OX=9606 PE=2 SV=1	833042	34610.5	647745	683754	622325	637282	562505	560078	711762	667885	742376	24489.2	1.54622e+06	1.59634e+06	1.14726e+06	1.14323e+06	1.0443e+06	7237.13	935999	921384	922853	977858	670624	793156	524373	550215	593954	627392	830716	815442	317180	328503	259707	264759	186250	184729	281905	242382	248663	302878	868676	813817	807763	21860	911711	436633	419414
192	tr|A0A5C2G755|A0A5C2G755_HUMAN	IGL c3537_light_IGKV4-1_IGKJ4 (Fragment) OS=Homo sapiens OX=9606 PE=2 SV=1	551.676	965.686	2690.25	3926.18	1342.05	1001.06	2400.1	1988.76	1338.07	1361.53	932.055	1480.27	1038.28	2975.03	1025.53	2121.76	1613.39	715.719	3620.39	904.795	1187.9	1068.67	1018.74	1382.93	828.399	1495.85	2078.41	2141.54	1092.56	1379.36	2250.01	3164.32	5698.56	6858.53	3096.29	884.786	1448.51	4259.48	1536.73	1664.55	6769.29	4436.48	5625.32	5512.39	1822.41	4004.94	5434.8
193	sp|Q9UGM5|FETUB_HUMAN	Fetuin-B OS=Homo sapiens OX=9606 GN=FETUB PE=1 SV=2	10950.7	9788.45	5375.05	7873.3	4919.68	3265.76	3616.19	2809.05	7910.26	8586.57	4951.55	1490.96	4939.49	5010.21	5652.03	6312.4	4841.95	3249.76	1480.27	4163.67	8680.94	6805.16	5715.17	3932.71	3930.87	5722.6	4183.66	3842.45	574.532	6300	3155.36	392.226	4856.96	6370.73	5045.93	3795.18	13778	14320.6	5370.23	5134.16	5598.24	4171.05	4152.64	2322.33	3528.63	7595.91	3759.18
194	tr|A0A7S5C0D5|A0A7S5C0D5_HUMAN	IGH c1572_heavy_IGHV5-51_IGHD3-22_IGHJ4 (Fragment) OS=Homo sapiens OX=9606 PE=2 SV=1	3571.13	1495.67	2407.13	3005.7	14088.2	12793.5	5139.28	5978.74	4393.28	1472.95	1989.85	205.549	3664.62	3926.56	852.824	1019.86	165.155	420.951	2090.28	3031.55	1094.39	1939.09	6177.15	6563.01	4051.84	4152.71	4245.64	4298.1	1979.93	2261.28	8765.23	11710.1	3270.14	3766.9	2159.84	744.185	19395.4	21050.2	5080.87	5433.37	2363.24	1106.64	1344.75	1461.73	1066.07	2481.67	1740.94
195	tr|A0A7S5EV40|A0A7S5EV40_HUMAN	IGH c527_heavy_IGHV4-39_IGHD3-22_IGHJ4 (Fragment) OS=Homo sapiens OX=9606 PE=2 SV=1	910.551	710.191	694.901	1296.24	1920.94	1256.58	6633.35	1756.67	521.672	3709.41	3356.81	2603.26	1465.01	84.1954	1862.02	3912.8	3007.71	886.154	1808.8	1476.5	2323.9	1098.32	2025.47	983.578	1018.34	338.119	5405.84	7171.46	693.934	4908.53	1667.77	704.14	1450.78	2444.86	2415.95	2939.4	3501.82	749.666	2353.02	654.106	326.031	313.854	244.874	1080.52	4403.27	2453.47	3506.78
196	tr|A0A5C2GT85|A0A5C2GT85_HUMAN	IG c721_heavy_IGHV3-33_IGHD3-10_IGHJ6 (Fragment) OS=Homo sapiens OX=9606 PE=2 SV=1	272.21	1494.94	2056.12	930.091	365.454	167.134	2189.67	2641.37	721.828	81.5255	970.474	271.129	1245.56	2854.08	1809.93	942.417	1390.09	810.924	1232.61	15548.1	607.731	1058.87	333.214	1078.83	642.006	1177.2	565.836	554.024	2448.04	1421.87	2736.4	2034.56	1657.12	346.387	2205.67	1516.71	1017.04	663.338	459.458	3175.44	5233.39	3752.27	4662.5	3575.22	4984.89	10803	9661.69
197	tr|A0A5C2GQE3|A0A5C2GQE3_HUMAN	IG c1552_heavy_IGHV3-49_IGHD2-15_IGHJ4 (Fragment) OS=Homo sapiens OX=9606 PE=2 SV=1	369.154	542.698	731.748	670.188	1433.05	2706.21	9613.98	9455.16	6839.84	7192.86	7636.02	6521.54	3897.88	2187.87	420.499	392.521	7103.41	7043.9	4553.56	2964	7063.41	8578.4	9233.25	11415.8	3817.9	4635.21	13731.6	13497.4	3102.22	2356.91	3361.95	3679.3	12570.8	9809.5	7930.49	7689.84	1140.09	1631.94	3033.78	3102.99	157.222	289.139	491.994	182.458	856.513	1788.46	621.786
198	tr|A0A5C2GAB7|A0A5C2GAB7_HUMAN	IGH + IGL c62_heavy_IGHV3-7_IGHD3-22_IGHJ5 (Fragment) OS=Homo sapiens OX=9606 PE=2 SV=1	1320.56	1814.63	267.665	186.033	772.771	817.088	1783.53	942.243	277.921	1067.46	792.271	554.216	2091.01	3067.93	0	564.015	295.655	745.075	524.462	966.486	1539.74	792.546	1335.9	1339.26	260.399	988.517	1262.64	327.231	1524.39	318.363	2384.41	1700.97	2713.5	4203.89	1075.49	682.578	4822.26	4869.46	1623.89	2244.81	792.592	161.12	1090.21	654.286	512.281	5541.77	6531.31
199	tr|Q6EZE9|Q6EZE9_HUMAN	Defensin, alpha 3, neutrophil-specific OS=Homo sapiens OX=9606 GN=DEFA3 PE=2 SV=1	9489.36	3682.22	9755.13	7218.87	5897.85	8266.22	8276.76	6927.19	8418.56	9818.23	18072.1	19316.3	7671.41	2548.55	4495.75	4298.99	5451.74	1736.43	3937.54	12837.9	9133.69	7868.76	7671.2	3860.43	10739	13305.9	7409.54	11265.8	7878.96	3888.14	6962.23	7372.4	7165.6	5565.83	10122.6	9521.1	8177.32	6143.56	7526.26	6738	10915.3	9821.98	6069.43	7016.57	8448.99	6751.04	4966.18
200	tr|A0A5C2GHW5|A0A5C2GHW5_HUMAN	IG c466_light_IGKV2-30_IGKJ2 (Fragment) OS=Homo sapiens OX=9606 PE=2 SV=1	9633.1	8651.86	5986.08	2262.02	19106.5	5293.76	12117.7	7832.72	3650.55	6351.53	2493.43	14770.9	7998.89	6375.44	1746.18	4461.87	308.743	3281.91	609.991	4669.7	6107.02	1548.56	2713.37	3376.19	4073.17	5010.93	6810	5361.67	6811.9	4561.22	14874.7	15089.8	5441.45	5083.08	3470.01	3363.96	4964.55	5785.03	8945.67	7664.55	4303.67	1711.7	3902.1	1034.62	3694.68	2989.66	2451.17
201	tr|V9HWJ7|V9HWJ7_HUMAN	Epididymis secretory protein Li 37 OS=Homo sapiens OX=9606 GN=HEL-S-37 PE=1 SV=1	1635.85	2151.52	3459.49	5481.37	5707.15	5666.5	6183.76	7120.9	4411.45	2292.16	3373.23	3677.57	4954.47	3334.41	5857.45	3744.44	1387.11	2818.62	6169.54	3810.86	4094.79	4208.71	2308.18	3357.75	4924.3	4779.43	4872.11	5255.5	3972.12	3787.25	11304.2	5108.95	5460.53	5803.84	5616.72	4238.87	10379.9	3437.12	6429.68	7129.51	3513.02	1845.31	2701.05	3886.12	2696.5	4071.4	4424.45
202	sp|P05109|S10A8_HUMAN	Protein S100-A8 OS=Homo sapiens OX=9606 GN=S100A8 PE=1 SV=1	4178.58	6988.92	5468.86	8011.22	3267.45	2129.98	6147.75	8845.5	4096.68	3707.78	12473.7	10976.4	7423.27	5570.94	2720.94	4699.95	5855.09	20455.4	15497.6	16837.8	4212.28	2696.45	4529.73	6597.06	7076.7	25055.9	24330.1	13153.1	3261.23	6194	4887.5	6794.94	5510.98	3190.52	4391.84	5722.46	2581.23	2046.78	5710.18	5956.04	25783.6	57665.7	52266.4	49160.5	58240.8	62395.5	29209.6
203	tr|A0A5C2GVM3|A0A5C2GVM3_HUMAN	IG c846_light_IGKV3-20_IGKJ4 (Fragment) OS=Homo sapiens OX=9606 PE=2 SV=1	813.266	3636.26	2942.87	2612.97	4734.72	4019.82	2198.44	2896.8	6701.72	5431.22	1830.53	4140.3	2431.88	7220.11	4365.41	538.353	1096.27	558.931	416.303	559.949	192.828	3568.54	2289.29	4322.47	4016.51	5341.17	4809.42	534.981	2949.69	2914.73	3859.31	4141.65	5806.42	5553.67	392.44	3542.44	1346.66	3092.57	552.663	577.571	3365.2	2253.3	1305.57	139.652	2554	8477.79	7653.92
204	tr|A0A5C2FZE8|A0A5C2FZE8_HUMAN	IGL c1536_light_IGLV1-51_IGLJ2 (Fragment) OS=Homo sapiens OX=9606 PE=2 SV=1	1072.77	1369.37	948.702	772.23	1060.61	1250.41	347.784	2935.02	3263.39	4752.32	2264.72	1962.8	3242.12	796.652	1804.31	422.294	673.399	1056.93	324.013	4026.16	1911.43	1153.34	2785.26	1793.69	1789.68	551.72	3190.35	3934.78	2501.55	3899.59	463.019	2103.37	1231.83	3242.12	3940.44	5158.27	6419.71	5238.95	3764.7	105.191	824.168	144.179	1054.25	98.1915	0	535.418	442.721
205	tr|A0A5C2G011|A0A5C2G011_HUMAN	IGL c1726_light_IGKV2D-29_IGKJ4 (Fragment) OS=Homo sapiens OX=9606 PE=2 SV=1	320.633	328.187	531.336	245.581	771.357	452.128	335.184	1986.06	307.087	951.569	315.11	169.674	519.555	508.897	112.719	201.453	0	232.366	224.047	345.473	120.849	431.25	122.204	517.043	236.71	256.033	96.5578	345.969	462.26	385.018	699.92	1418.81	340.477	1299.61	218.277	575.15	670.276	854.21	449.261	542.763	1615.62	2308.36	2038.39	581.142	1708.24	8071.03	11819.6
206	tr|A0A7S5C523|A0A7S5C523_HUMAN	IGH c4012_heavy_IGHV2-70_IGHD3-9_IGHJ2 (Fragment) OS=Homo sapiens OX=9606 PE=2 SV=1	5342.9	2690.62	6372.32	8123.08	5862.52	479.108	974.941	1777.94	9963.91	11272	2911.73	912.458	3391.88	7482.95	3913.43	1728.84	1344.98	2809.86	6395.04	3087.67	5416.69	4443.97	8413.35	7873.91	3779.25	6703.53	4171.25	4900.88	2438.62	4519.03	8803.6	8079.24	6712.8	7805.71	4626.47	4829.89	10287.9	6682.86	5342.57	4815.7	6369.99	6487.25	5178	2810.69	9969.44	31606.1	25544.8
207	tr|A0A5C2G5C2|A0A5C2G5C2_HUMAN	IGH c189_heavy__IGHV3-33_IGHD6-19_IGHJ5 (Fragment) OS=Homo sapiens OX=9606 PE=2 SV=1	2515.87	3023.59	3264.22	3516.39	49605.1	55821.3	3797.47	4456.51	5769.88	4228.61	2135.12	3400.81	2783.47	1555.66	2467.94	5435.74	1818.44	431.682	6116.63	3864.36	4225.02	2516.92	4308.7	4169.8	4055.14	3738.09	4703.3	1535	5642.23	6050.28	4475.01	11583.9	7638.44	7027.45	6012.26	5243.4	6945.66	3990.72	10038.9	4643.01	8221.47	8958.1	3887.01	1040.31	8005.28	9073.19	4831.42
208	tr|A0A5C2GY75|A0A5C2GY75_HUMAN	IG c670_light_IGKV2-24_IGKJ2 (Fragment) OS=Homo sapiens OX=9606 PE=2 SV=1	10805.8	8824.06	7043.91	5963.36	142475	167382	28790	31406	7670	12696.1	15726.4	3289.45	18181.4	17171.8	14822.2	11488.2	3709.68	2876.17	10644.9	18389.3	22795.8	23244.7	23099.1	28951.3	29845.5	31509.3	12511.8	7920.07	2578.91	5972.06	36367	42165.3	25106.8	25258.8	17562.9	9214.15	18406.4	15995.3	28150.6	21355.5	1275.39	1990.32	4419.18	4056.53	5226.37	20529.5	22793
209	sp|Q92496|FHR4_HUMAN	Complement factor H-related protein 4 OS=Homo sapiens OX=9606 GN=CFHR4 PE=1 SV=3	6702.45	6898.24	9068.95	10034.9	1255.48	2262.18	7769.25	673.19	324.982	3360.81	3872.98	3976.23	3835.86	3981.58	6537.66	4068.98	1002.51	1142.67	4937.42	3398.04	4695.49	5652.47	10144.1	12763.8	4767.41	5065.29	2123.43	1980.21	6559.85	8784.17	7097.14	9249.93	7441.63	3441.84	8359.71	7931.05	9283.71	3704.59	9437.79	11825.5	13031.4	7876.97	9840.5	10404.2	12073.5	11037.5	9829.71
210	tr|A0A5C2GN14|A0A5C2GN14_HUMAN	IG c1134_light_IGLV4-69_IGLJ2 (Fragment) OS=Homo sapiens OX=9606 PE=2 SV=1	409.443	1002.89	674.13	940.814	1520.56	151.653	1636.42	294.459	340.883	2729.06	1529.69	1501.6	571.785	1106.6	3365.25	1345.85	984.315	787.825	1930.92	883.084	1358.23	3107.02	1552.9	304.842	1920.48	1614.06	1949.89	813.768	1140.17	817.02	513.702	214.692	3296.23	4610.79	573.469	214.574	1635.47	2025.05	12505.1	13196.9	400.069	516.792	1348.23	352.397	345.975	12119	2375.63
211	tr|A0A5C2GAN2|A0A5C2GAN2_HUMAN	IGH + IGL c266_light_IGKV1-27_IGKJ4 (Fragment) OS=Homo sapiens OX=9606 PE=2 SV=1	2538.63	1560.03	803.687	521.013	2720.63	2768.36	3065.18	3699.33	2184.05	1539.23	1517.07	988.459	747.202	367.972	2524.01	1739.62	362.078	553.512	2038.47	1779.77	256.125	726.176	1581.99	1089.64	1495.31	706.454	805.441	1197.02	762.797	311.963	680.218	1611.55	6303.21	7138.66	792.878	1201.78	3055.49	2085.58	2123.41	463.725	243.654	328.169	1237.94	1125.31	1694.78	9977.19	2145.38
212	tr|A0A7S5C4Y0|A0A7S5C4Y0_HUMAN	IGH c3952_heavy_IGHV1-24_IGHD1-26_IGHJ4 (Fragment) OS=Homo sapiens OX=9606 PE=2 SV=1	5623.15	15508.6	25899.7	35633.3	2651.92	2882.08	12544.7	22818	24253.8	6275.14	2769.06	4262.79	17269.6	19600.5	13230.9	10680.6	560.339	857.898	5835.42	19243.1	2552.02	3243.77	11031	29429	19727.1	5821.79	20335.9	27568.7	7436.04	3105.81	8194.58	25782.4	26206.5	5895.19	8060.66	18621.3	31491.8	14896.7	16378.9	6510.99	16577.1	24498.9	15632.6	25954	17657.3	30366.8	28688.2
213	tr|A0A7S5C294|A0A7S5C294_HUMAN	IGH c400_heavy_IGHV5-51_IGHD6-25_IGHJ6 (Fragment) OS=Homo sapiens OX=9606 PE=2 SV=1	5329.21	4863.78	2417.25	520.967	929.204	469.33	138.191	1314.76	184.581	1825.39	829.516	1192.4	1204.64	338.57	1008.72	659.296	194.04	987.297	823.709	491.593	1833.24	1964.76	758.842	872.053	1533.36	423.94	914.784	149.655	554.363	174.198	1085.07	790.504	214.055	838.747	534.449	1257.28	1191.43	898.551	1191.75	552.497	1083.25	141.773	224.297	871.581	924.052	657.008	1271.37
214	tr|A0A7S5C286|A0A7S5C286_HUMAN	IGH c385_heavy_IGHV3-23_IGHD3-22_IGHJ4 (Fragment) OS=Homo sapiens OX=9606 PE=2 SV=1	8312.7	5824.65	19546.4	25485.4	12440.8	17553.9	31253.6	34215.8	9883.09	10741	12656	15403.3	8057.2	6569.34	6157.91	9317.47	3515.36	4034.16	14288.9	11963.7	11737.4	11941.7	19020.7	18054.8	22336	24622.5	15647.4	11737.2	8589.19	9384.12	11213.1	15296.1	15695.5	17976.7	7591.01	9282.77	23282.6	14437	19084.8	22629	31578.2	18170.3	3048.27	19246.3	18552.4	5456.14	7817.74
215	tr|A0A5C2GQW8|A0A5C2GQW8_HUMAN	IG c1732_heavy_IGHV3-30_IGHD5-12_IGHJ4 (Fragment) OS=Homo sapiens OX=9606 PE=2 SV=1	18319.2	2156.05	14721.5	12374.9	14630.6	16537.9	19670.5	5822.33	20609.9	21500.8	32986.2	32722.9	10850.1	10780.1	10467.8	1659.03	7206.82	7018.99	17038.8	17371.3	14142.8	16447.6	13584.1	14323.8	19473.8	18810.4	15312.2	12185.1	12368.7	10682.7	15094.6	13711.7	12601.5	15794.3	9376.04	1807.08	25218	24137.9	12640.9	12831.8	13692.4	10657.2	246.154	12124.3	15113.3	26071.9	48674.7
216	tr|A0A5C2FZ03|A0A5C2FZ03_HUMAN	IGL c497_light_IGKV1D-17_IGKJ1 (Fragment) OS=Homo sapiens OX=9606 PE=2 SV=1	3075.85	1468.14	708.874	1765.72	2119.73	8142.58	7924.17	3788.99	6094.31	4313.13	567.232	602.179	546.889	298.507	638.003	1054.98	622.457	716.22	478.486	819.862	1061.71	838.799	1313.38	1126.63	684.211	412.147	1350.94	1399.12	294.044	483.603	1925.52	5473.33	1239.26	2915.62	1171.12	651.168	1333.29	584.041	392.855	898.133	87.137	431.306	1392.65	451.132	708.843	1335.44	1335.8
217	sp|P08779|K1C16_HUMAN	Keratin, type I cytoskeletal 16 OS=Homo sapiens OX=9606 GN=KRT16 PE=1 SV=4	2096.7	587.087	5533.05	6060.28	2603.87	3590.31	1963.31	3555	6629.73	6963.73	11118.5	2327.68	1371.51	1610.71	4323.32	1946.63	1003.79	12583	1870.61	2359.07	4424.87	10863.7	2187.39	567.259	2610.98	2559.66	2741.38	13672.1	4302.79	981.616	19450.3	3298.23	2286.67	13413.9	2234.77	2382.17	3850.27	532.047	2927.53	9060.1	338.302	629.177	2216.56	1698.9	390.661	2400.06	1176.56
218	sp|Q13790|APOF_HUMAN	Apolipoprotein F OS=Homo sapiens OX=9606 GN=APOF PE=1 SV=2	4484.5	6268.6	7011.45	5792.52	5104.07	1086.14	7924.36	7833.02	2349.96	1617.77	3533.49	4567.19	2751.51	4578.17	2196.59	2674.01	3252.68	2759.17	5222.51	5043.26	5464.53	4252.21	5104.94	9006.09	3009.51	2876.47	1722.81	7399.86	6584.63	4777.75	4398.84	3226.27	6570.04	6235.75	13420.3	14354.6	9817.96	5006.99	4428.64	6199.64	9197.75	6450.28	4812.04	6436.56	8731.49	3008.33	6803.04
219	tr|A0A7S5C0P7|A0A7S5C0P7_HUMAN	IGH c1389_heavy_IGHV2-5_IGHD6-19_IGHJ4 (Fragment) OS=Homo sapiens OX=9606 PE=2 SV=1	1173.02	10353.2	905.919	8119.95	3548.05	1737.3	835.05	647.202	897.271	436.418	1223.93	1321.28	2934.56	2117.99	1181.64	1878.66	716.679	13278.1	2015.8	785.777	1411.61	1021.96	7344.41	7108.47	26408.6	20502	3928.2	13089.5	661.034	1875.32	1224.21	16792	541.08	1250.31	18660.6	905.483	2286.55	702.865	3842.6	5981.1	768.325	901.165	259.986	602.179	1024.94	1984.4	1271.69
220	tr|B2R4C5|B2R4C5_HUMAN	1,4-beta-N-acetylmuramidase C OS=Homo sapiens OX=9606 GN=LYZ PE=2 SV=1	1759.01	1196.83	4004.49	3726.83	4563.75	2618.01	4101.54	4003.5	825.223	978.233	2370.61	3240.88	2533.05	2298.16	2089.55	1591.24	765.661	517.414	926.392	4280.31	2687.49	843.711	600.406	1814.9	2227.23	1949.45	844.288	1836.3	4422.75	3512.25	2341.85	2860.82	2595.35	2760.11	2759.19	2685.43	3481.65	3553.29	2381.32	491.197	3889.45	2058.11	3234.97	1797.2	3353.45	5263.7	2824.3
221	tr|A0A7S5BY15|A0A7S5BY15_HUMAN	IGH c252_heavy_IGHV4-39_IGHD3-10_IGHJ4 (Fragment) OS=Homo sapiens OX=9606 PE=2 SV=1	1118.92	720.672	270.44	667.67	1628.66	290.618	1397.21	532.9	1316.32	1440.22	150.965	1389.16	779.808	871.079	660.495	528.562	357.211	201.922	667.722	545.831	877.248	657.164	1270.29	1705.03	1244.19	1173.85	1218.8	1330.64	873.009	1028.93	722.557	795.909	1252.68	1836.17	2168.69	851.98	1976.8	1377.83	1090.51	3044.62	533.97	174.45	530.476	850.311	685.153	977.8	1454.96
222	tr|A0A5C2H3L0|A0A5C2H3L0_HUMAN	IG c1606_light_IGKV4-1_IGKJ2 (Fragment) OS=Homo sapiens OX=9606 PE=2 SV=1	13444.9	13404.1	14038.5	16074.4	21460.1	25237.9	27627.4	25310.8	16691.2	12141.2	9905.75	9402.42	4903.18	6416.56	5075.85	8015.61	391.386	2972.58	6665.15	8380.93	12549.8	12520.2	10378.1	9485.55	9343.51	10788.2	17828.1	16097	1272.35	2219.81	18577.1	18585.1	23969.3	23277.4	11369.5	7785.53	14945.7	13817.5	16251.8	18352.7	3356.33	1743.02	2727.57	2217.56	2311.99	9481.32	7811.17
223	tr|A0A7S5EYL7|A0A7S5EYL7_HUMAN	IGH c4094_heavy_IGHV3-21_IGHD5-18_IGHJ4 (Fragment) OS=Homo sapiens OX=9606 PE=2 SV=1	2834.24	1879.21	281.093	685.363	1504.66	507.905	686.308	410.605	272.74	1054.01	195.106	540.022	1603.54	686.478	974.083	385.559	134.175	1378.59	1900.65	388.271	1693.03	2356.31	2603.31	345.392	1676.02	1679.27	431.565	2258.55	553.474	2576.71	760.893	3330.7	809.994	414.63	3014.05	898.384	1032.48	2104.96	2341.74	981.941	2792.9	2311.1	3079.16	996.93	2337.26	11202.2	9747.79
224	tr|A0A5C2G084|A0A5C2G084_HUMAN	IGL c2668_light_IGLV2-14_IGLJ2 (Fragment) OS=Homo sapiens OX=9606 PE=2 SV=1	17755.1	13759.8	29485.9	47497.3	17302.6	16057.6	23653.6	26441.7	21483.2	23513.2	37194.3	24591	19141.9	3824.44	35350.1	36182	16375.1	11767.7	34304.8	37057.8	35173.2	29916.5	34626.1	34127.6	51348.9	56024.1	36520.7	25893.6	36757.1	39800.3	31227.3	29492.3	49418.5	34214.2	38413.6	38624.7	28949.7	31039.6	39416.6	32063.1	56870.3	50323.3	53581.2	58624	60083.6	160021	158593
225	tr|A0A7S5C098|A0A7S5C098_HUMAN	IGH c1626_heavy_IGHV3-33_IGHD3-16_IGHJ2 (Fragment) OS=Homo sapiens OX=9606 PE=2 SV=1	7371.02	6884.47	6612.68	4868.42	9567.33	9494.76	23151.1	24897.1	13436.9	15600	6660.55	4749.89	8383.31	13974.4	5388.97	3361.69	6158.48	5917.11	9282.77	10157.2	11365.8	8919.38	8945.31	7464.61	12183.9	13579.1	10492.6	9258.32	8421.58	5064.3	13212.6	13402.1	19108.2	19135.2	3143.84	2210.52	10896.6	10619.4	11132.8	11115.3	1598.36	2445.36	680.032	883.926	2840.82	12884	12608.8
226	tr|A0A5C2GMZ5|A0A5C2GMZ5_HUMAN	IG c855_heavy_IGHV3-23_IGHD1-26_IGHJ1 (Fragment) OS=Homo sapiens OX=9606 PE=2 SV=1	547.496	591.229	4672.23	1937.58	4158.52	5402.18	8671.72	8336.15	7222.67	6490.43	1660.52	803.106	2696.5	1999.15	478.62	520.095	498.124	603.057	646.864	2985.99	5075.28	3163.27	2344.07	2486.32	1522.09	2398.93	456.096	3041.95	2568.07	3026.23	5945.95	4555.06	2386.17	5245.31	5160.98	5796.56	4387.23	2881.62	3441.42	2679.8	1655.19	1438.75	163.719	538.951	223.197	2329.12	2715.62
227	tr|A0A5C2G445|A0A5C2G445_HUMAN	IGL c1073_light_IGKV1-5_IGKJ2 (Fragment) OS=Homo sapiens OX=9606 PE=2 SV=1	597.582	358.071	798.715	535.302	1787.6	125.2	115.542	1565.93	278.327	388.386	264.623	241.224	463.148	888.22	1385.35	6365.93	168.087	831.569	648.099	4472.13	1738.61	2533.4	783.781	933.472	1901.33	458.678	279.532	281.001	807.362	830.318	212.688	986.157	611.801	473.035	464.279	267.714	1390.1	225.177	961.98	833.9	389.208	288.301	417.559	188.517	461.221	722.725	139.994
228	tr|A0A7S5EWY8|A0A7S5EWY8_HUMAN	IGH c2657_heavy_IGHV3-21_IGHD3-9_IGHJ6 (Fragment) OS=Homo sapiens OX=9606 PE=2 SV=1	24102.5	20732.8	15081.4	12644.1	20994.3	12932.3	34096.7	25848.7	17536.4	19059.6	11757.4	8396	8417.29	12051.4	5551.1	8255.1	8386.65	9265.15	8392.56	18807.2	8080.69	4408.22	22580.1	23974.1	16973.8	17301.1	14751.8	17726.3	13879.8	14228.6	23155.4	24214.4	31890.5	25658.3	13430.3	10980	28257.4	22160.1	20367.9	23742.1	11248.7	10822.6	5783.89	4055.53	7940.7	33601.2	30404.9
229	tr|A0A5C2G9L0|A0A5C2G9L0_HUMAN	IGH + IGL c484_heavy_IGHV1-2_IGHD4-17_IGHJ6 (Fragment) OS=Homo sapiens OX=9606 PE=2 SV=1	535.756	1165.36	2805.08	2926.67	8800.34	11261.4	5348.14	4640.83	5410.66	5525.53	3781.84	1664.37	1982.41	728.387	3146.28	3748.75	853.111	151.574	4382.5	4023.93	1046.29	1697.4	3228.13	3620.69	3768.12	5221.65	2796.51	1424.19	131.686	669.877	2699.83	4833.28	4629.03	1220.32	6668.39	6816.52	10034.9	6006.74	3565.6	3610.42	224.908	979.594	616.464	110.765	426.743	6076.68	7484.31
230	tr|A0A5C2H2C4|A0A5C2H2C4_HUMAN	IG c1116_light_IGKV3-20_IGKJ2 (Fragment) OS=Homo sapiens OX=9606 PE=2 SV=1	2484.65	9263.84	8905.88	6582.79	11220.3	6185.35	31426	25433	14636.7	13303.3	61776.6	65545.8	12874.3	2900.24	36919.2	36260.9	10428.7	904.508	15886.4	11056.4	26520.8	22360.3	5666.88	5347.79	15618.2	13389.3	6061.28	28012.2	2476.88	1010.86	6575.69	7933.95	7236.07	6830.46	5807.66	5426.31	18401	2708.57	12177	8532.79	1849.67	1598.94	784.894	230.407	1881.78	9833.61	5762.26
231	tr|A0A7S5C045|A0A7S5C045_HUMAN	IGH c1372_heavy_IGHV3-53_IGHD3-10_IGHJ3 (Fragment) OS=Homo sapiens OX=9606 PE=2 SV=1	5299.97	3861.75	4933.92	3122.48	1611.33	3107.74	579.882	1630.88	1488.24	530.343	1618.73	1602.39	3334.76	505.708	802.167	418.15	1588.76	407.84	1393.76	1616.4	664.634	713.084	1108.58	1212.51	1117.61	927.812	890.247	975.389	1930.59	2399.99	931.345	2096.03	230.975	2394.83	1068.76	838.44	1246	1712.32	607.003	713.42	278.757	3185.05	1889.31	1559.42	411.791	142.494	299.26
232	tr|A0A7T0PXT4|A0A7T0PXT4_HUMAN	Immunglobulin heavy chain variable region (Fragment) OS=Homo sapiens OX=9606 PE=2 SV=1	5081.39	6004.37	1899.06	5023.81	1248.56	2590.99	7851.15	8231.53	5973.88	7586.64	5700.07	5412.76	4600.19	5589.25	2615.39	1120.6	1998.72	702.655	8367.04	5901.81	7126.53	6554.89	4138.76	6197.79	5192.21	8734.43	7754.91	8260.79	4317.86	4112.6	4612.19	5563.58	6991.35	9874.6	4983.85	3646.82	3643.44	170.716	8521.46	9709.33	769.012	1610.46	528.069	1383.23	2002.97	685.5	3304.98
233	tr|B3KUE5|B3KUE5_HUMAN	Phospholipid transfer protein, isoform CRA_c OS=Homo sapiens OX=9606 GN=PLTP PE=2 SV=1	1155.43	1269.51	1484.89	375.318	185.922	1388.61	596.162	253.561	1281.52	1478.72	222.402	485.724	971.489	418.127	668.263	700.44	1100.12	885.601	496.285	727.182	609.18	1900.94	2221.01	1704.47	1309.5	1480.24	1956.96	532.963	615.736	1461.03	1166.13	946.685	312.036	679.527	570.341	358.127	6498.08	4075.71	203.036	406.858	395.899	480.252	809.317	599.43	957.012	1017.37	1897.6
234	tr|A0A7S5C4Y8|A0A7S5C4Y8_HUMAN	IGH c3967_heavy_IGHV3-11_IGHD1-26_IGHJ4 (Fragment) OS=Homo sapiens OX=9606 PE=2 SV=1	1889.43	1578.67	1050.39	1952.6	2796.36	3442.65	1811.56	2639.5	816.82	3343.08	1978.8	2331.67	975.599	715.543	849.023	1030.78	617.025	780.481	704.724	307.881	4734.69	2295.59	1546.53	3081.25	2776.94	2616.66	3543.18	3085.01	1099.67	1210.15	2658.95	3032.4	3261.83	3286.87	1115.88	844.117	1874.25	4089.09	2515.86	2794.74	546.886	954.713	632.905	772.457	499.17	2422.69	2185.54
235	tr|A0A5C2GGF5|A0A5C2GGF5_HUMAN	IGL c499_light_IGKV1-5_IGKJ2 (Fragment) OS=Homo sapiens OX=9606 PE=2 SV=1	6344.52	7269.63	4182.41	4466.83	5204.14	8717.47	9215.39	7622.39	13219.4	14123.1	9340.93	14133.2	10075.9	9179.25	2393.15	1808.76	1770.58	1292.56	6976.9	5155.31	4928.83	5919.28	5590.46	10098.9	9449.79	7223.92	3611.41	4956.46	4218.25	5564.68	6921.82	6448.82	3002.39	5838.74	8114.63	8297.63	8444.93	9770.71	4210.56	5587.42	3202.68	1025.86	3820.86	1142.32	1613.68	1175.59	4510.56
236	tr|A0A0X9V9C4|A0A0X9V9C4_HUMAN	GCT-A8 heavy chain variable region (Fragment) OS=Homo sapiens OX=9606 PE=2 SV=1	10906.5	10723.7	3118.39	14671.6	6100.94	1011.14	2267.5	2315.76	3280.37	1972.42	6067.82	2484.73	6641.95	2803.65	1480.07	8434.92	1570.57	1483.07	2943.44	17623.3	3185.59	4957.52	2854.47	2001.13	4056.31	6394.67	1357.29	2438.25	2195.48	3126.52	5903.1	7819.15	35914.8	23386.6	1283.95	986.449	22499.7	19226.9	6499.41	7773.4	3344.81	3256.2	4603.79	5141.23	5935.44	28369	15483.7
237	tr|A0A7S5EWS1|A0A7S5EWS1_HUMAN	IGH c768_heavy_IGHV3-48_IGHD4-17_IGHJ3 (Fragment) OS=Homo sapiens OX=9606 PE=2 SV=1	6932.33	1234.46	908.448	655.71	1619.08	12114.3	1694.48	1048.4	806.782	11486.2	3893.41	16567	12949.7	6462.22	11766	7071.97	197.307	156.637	15484.1	15617.9	2857.98	1434.75	222.354	6299.85	15034.7	15390.9	14188.4	13514.4	12459.8	534.972	568.48	2163.9	1571.69	190.997	442.961	313.042	4121.48	990.098	312.273	1519.31	882.208	383.208	589.897	1288.14	1070.05	3977.7	1475.18
238	tr|A5YAK2|A5YAK2_HUMAN	Apolipoprotein C-IV OS=Homo sapiens OX=9606 GN=APOC4 PE=2 SV=1	16152.5	12062	5496.88	8157.78	2824.24	1856.15	6315.24	5551	7342.51	7876.26	5586.43	6102.32	9910.36	8792.6	13447	13069.6	9373	8864.54	4621.55	3637.47	7151.3	7012.04	6962.17	5598.57	4384.85	5483.16	10535.9	8921.08	4841.13	4101.51	6122.8	7478.15	10832.7	8405.5	5963.41	4442.93	6272.67	2786.07	9507.3	9233.25	2206.43	2781.29	2642.77	4595.17	3643.59	9036.8	6190.52
239	tr|A0A7S5C339|A0A7S5C339_HUMAN	IGH c3007_heavy_IGHV3-48_IGHD3-22_IGHJ6 (Fragment) OS=Homo sapiens OX=9606 PE=2 SV=1	9641.6	9656	2831	6406.37	2788.22	15948.8	1484.3	1860.01	1154.04	16369.5	5654.91	4004.06	2800.49	14909.1	5894.49	4129.42	1140.16	1212.75	5002.79	6804.39	6339.15	3883.06	4321.66	2721.32	3224.48	2518.26	3941.36	6004.17	3327.53	2507.69	3253.1	11735.3	6597.61	2755.07	3274.61	5401.41	9181	328.553	2028.95	14382.9	2390.01	2738.44	141.573	4308.16	1087.11	2203.39	2521.92
240	tr|A0A7T0PXI8|A0A7T0PXI8_HUMAN	Immunglobulin heavy chain variable region (Fragment) OS=Homo sapiens OX=9606 PE=2 SV=1	2295.73	585.582	428.572	200.34	4708.46	269.832	628.613	1977.34	1263.41	181.68	2616.06	1076.86	631.72	2016.59	1823.89	1289.16	2665.24	2122.92	2928.17	2420.46	1295.93	286.169	132.063	3157.06	243.785	893.961	801.591	1279.34	634.081	360.464	575.086	662.036	2805.39	1281.59	533.395	1242.01	1882.88	1797.5	3282.32	3216.55	179.189	3054.77	1707.49	403.62	687.99	2953.69	3317.77
241	tr|A0A7S5C132|A0A7S5C132_HUMAN	IGH c1174_heavy_IGHV6-1_IGHD3-10_IGHJ2 (Fragment) OS=Homo sapiens OX=9606 PE=2 SV=1	8067.07	3526.11	8913.31	5231.41	12968.4	9996.5	7172.64	5369.39	6298.08	5565	5983.25	5713.24	10093.1	7462.68	15246.5	6504.91	2597.27	3925.46	10008.2	9748.49	5600.24	5577.56	15282	15263.5	11561.1	12754.9	8591.37	9751.79	3218.91	3771.57	1962.11	5572.24	8156.43	10036	4346.02	5719.04	2261.03	2415.06	10145.1	10159.9	7238.7	3475.26	3571.74	2189.32	1453.23	12432.7	12727.6
242	tr|A0A5C2GFB3|A0A5C2GFB3_HUMAN	IG c803_heavy_IGHV1-69_IGHD4-17_IGHJ6 (Fragment) OS=Homo sapiens OX=9606 PE=2 SV=1	7732.86	3741.16	6584.87	7322.62	465.283	855.025	9267.66	5157.69	1375.87	1317.1	5593.64	455.77	4075.03	4798.9	7127.64	958.884	770.719	225.139	1688.92	1400.17	908.819	1069.32	5392.14	146.928	3122.77	834.006	377.986	4869.7	812.463	4803.52	3292.67	936.266	1891.43	147.632	455.217	1865.07	218.083	295.947	4594.82	1740.51	7882.56	6376.73	7267.51	7030.91	6788.94	9437.23	6818.52
243	tr|V9HW12|V9HW12_HUMAN	Epididymis secretory sperm binding protein Li 2a OS=Homo sapiens OX=9606 GN=HEL-S-2a PE=2 SV=1	1008.81	831.029	1859.06	1903.37	17985.1	25762.6	2099.96	922.983	1182.83	2251.27	1918.88	3534.52	1923.97	525.298	921.87	5163.02	2529.8	3061.57	3471.07	1083.88	3694.07	3977.59	2630.72	4808.39	15320.8	14846.9	4835.14	2195.15	7891.04	7836.76	21664.1	19775.1	1822.11	1301.35	23356.7	24730.5	6033.06	4967.53	1771.96	1453.71	1519.65	1321.77	1415.87	1001.01	1409.9	1195.11	890.845
244	tr|A0A5C2GHF4|A0A5C2GHF4_HUMAN	IG c486_light_IGKV3-20_IGKJ2 (Fragment) OS=Homo sapiens OX=9606 PE=2 SV=1	7590.96	1670.57	1124.91	1285.4	2753.99	3156.44	11357	3141.02	1698.99	9378.65	4757.43	15031.5	6133.98	8189.15	3099.88	3560.61	2198.28	5423.74	2580.71	6689.5	7360.68	6670.55	1334.8	9936.28	7524.44	14489.2	1957.01	3185.55	11756.8	22691.6	5132.97	695.014	3364.65	10161.1	3762.48	1178.62	2579.12	12196.2	1400.19	1332.89	7683.19	10964.1	314.336	2526.27	7116.96	7358.29	3619.92
245	tr|A0A5C2G9Y8|A0A5C2G9Y8_HUMAN	IGH + IGL c644_heavy_IGHV1-69_IGHD5-12_IGHJ4 (Fragment) OS=Homo sapiens OX=9606 PE=2 SV=1	2601.07	3344.39	10098.7	8967.27	10895.9	8213.04	11256.8	11071.4	9378.94	9760.67	4252.02	7603.55	4675.29	6227.71	3665.5	6085.03	826.429	2317.17	8359.95	5465.63	2768.23	5257.26	8267.17	8907.46	6399.09	10114.2	10491.7	10038.4	1205.29	3413.51	4689.61	6433.92	8834.48	8542.56	4209.72	4349.37	13268.8	6186.19	9225.24	8789.69	1051.95	1188.18	1255.56	1514.7	4700.43	15770.4	11125.2
246	tr|A0A5C2G2X8|A0A5C2G2X8_HUMAN	IGL c3628_light_IGLV1-47_IGLJ3 (Fragment) OS=Homo sapiens OX=9606 PE=2 SV=1	298.475	260.199	785.259	381.017	241.775	354.956	411.973	564.65	543.32	728.535	1679.95	849.566	2689.52	1560.31	465.404	582.221	197.836	224.564	553.56	1051.64	853.258	579.811	611.376	547.199	345.755	166.451	373.383	522.514	563.367	173.004	108.761	336.547	487.583	379.447	396.227	548.559	700.81	617.275	257.846	1262.27	70.5438	173.938	544.347	256.331	554.789	651.853	515.281
247	tr|A0A5C2GBE2|A0A5C2GBE2_HUMAN	IGL c3713_light_IGLV7-46_IGLJ2 (Fragment) OS=Homo sapiens OX=9606 PE=2 SV=1	1487.03	5474.29	281.791	1478.42	1169.13	867.659	1265.59	744.364	1680.95	971.317	1695.53	879.13	279.224	6448.68	754.136	2361.89	1029.44	1343.06	1529.39	1149.82	1408.6	1454.21	1504.2	9322.2	2837.26	7667.55	329.054	599.935	1490.32	1775.74	953.603	4571.49	379.756	952.414	1406.76	868.714	2492.93	2558.81	2539.96	1448.17	6175.37	1236.55	1106.46	1348.43	6212.78	28507.4	30978.9
248	tr|A0A5C2GH36|A0A5C2GH36_HUMAN	IG c401_light_IGKV3-20_IGKJ4 (Fragment) OS=Homo sapiens OX=9606 PE=2 SV=1	3612.68	3090.74	2209.73	2501.43	2661.82	3190.64	5443.54	6295.03	2066.49	3199.75	4144.09	2838.27	7226.08	7700.8	5793.33	3332.1	559.505	6176.48	934.268	7225.14	10348.5	8120.76	3685.76	4306.74	721.569	1006.65	1999.09	3258.67	2728.68	648.602	307.343	4702.19	610.323	995.386	4194.15	150.093	596.421	1485.66	3239.22	2792.7	739.35	1056.1	354.383	1130.16	1120.04	1102.18	2119.55
249	tr|A0A7S5BZ90|A0A7S5BZ90_HUMAN	IGH c922_heavy_IGHV4-59_IGHD3-22_IGHJ4 (Fragment) OS=Homo sapiens OX=9606 PE=2 SV=1	1280.94	719.72	269.302	466.522	2515.2	2160.96	1376.41	1159.17	1049.12	463.325	1113.68	1292.1	736.656	1071.85	612.284	291.08	245.635	1000.95	988.17	266.351	705.795	842.249	1197.07	1080.74	1267.75	905.713	491.68	456.48	450.828	182.641	832.894	950.076	821.357	352.362	711.084	101.334	918.52	352.617	1169.1	1758.41	244.023	107.731	258.687	529.361	583.903	842.411	197.815
250	tr|A0A5C2G8R9|A0A5C2G8R9_HUMAN	IGL c205_light_IGKV4-1_IGKJ1 (Fragment) OS=Homo sapiens OX=9606 PE=2 SV=1	81.5611	1330.93	1221.87	1600.12	175.827	341.477	768.289	414.11	206.774	151.987	332.824	103.407	965.981	653.635	578.965	209.295	303.849	455.829	419.66	345.424	1184.65	543.252	895.629	303.365	480.741	1178.46	247.974	257.646	575.815	311.958	428.175	651.752	351.281	669.265	390.55	446.686	993.952	217.644	333.321	292.127	560.864	1361.09	405.82	1017.09	1350.1	22115	20231.4
251	tr|A0A7S5C0N2|A0A7S5C0N2_HUMAN	IGH c949_heavy_IGHV3-23_IGHD1-26_IGHJ4 (Fragment) OS=Homo sapiens OX=9606 PE=2 SV=1	3557.74	1736.25	4293.14	3976.02	2045.42	546.483	9750.68	8701.57	6164.11	6632.72	2361.15	3635.18	5316.93	2516.59	2260.3	12387.5	2392.01	647.066	5641.1	6945.51	4587.05	3429.8	3597.83	9482.29	10112.5	15432.4	6384.19	5042.82	2731.17	4039.29	7021.17	2615.87	5231.82	5753.62	6054.68	6857.01	7544.08	7371.45	14995.3	16244	1540.78	2045.13	2889.62	1663.63	1447.37	3796.32	7321.55
252	tr|A0A7S5C3L2|A0A7S5C3L2_HUMAN	IGH c3262_heavy_IGHV5-51_IGHD6-13_IGHJ6 (Fragment) OS=Homo sapiens OX=9606 PE=2 SV=1	1673.3	1320.4	1380.2	1068.3	316.367	4598.3	3259.5	4053.61	5307.36	5397.22	2941.5	3155.46	3756.8	2709.98	842.257	2640.24	1590.13	1545.3	2542.76	4083.99	7112.08	5844.77	5619.46	4405.93	5215.84	5829.89	2382.87	3099.03	1509.71	2127.29	5046.93	6973.58	5031.99	1498.34	2704.5	1636.15	10233.9	10409.2	5488.27	4972.21	327.815	770.408	1307.37	1108.19	1338.82	4476.23	4039.08
253	tr|A0A5C2GJB1|A0A5C2GJB1_HUMAN	IG c45_light_IGKV3-20_IGKJ2 (Fragment) OS=Homo sapiens OX=9606 PE=2 SV=1	23329.6	21116	13982.2	13661.7	30534	33868.3	31197.9	27424	21012.4	20655.1	38086.7	37650.6	13711	13548.7	11582.8	9600.65	5841.9	4865.43	23535.3	26363.7	15425.7	15926.2	11198.2	12838.3	15667.2	16384.1	18052.2	17069.2	14786.6	15194.7	12161.5	10405.5	19068.3	19795.2	9556.4	8807.13	19718.1	18436.1	32549.5	33783.5	8494.66	7500.81	7002.66	1971.77	1679.41	24590.3	19676
254	tr|A0A5C2GET5|A0A5C2GET5_HUMAN	IG c120_heavy_IGHV3-49_IGHD2-2_IGHJ3 (Fragment) OS=Homo sapiens OX=9606 PE=2 SV=1	3788.95	1383.96	2158.45	4311.06	8013.96	10976.5	9369.27	9176.08	7423.85	7979.82	10054.5	11933.1	19023.8	17970.1	1065.2	6545.95	1953.14	2393.89	616.255	748.374	872.753	7063.9	5608.77	6707.88	10729.4	10963.1	3206.44	5280.59	4527.3	1584.76	8233.02	8689.47	8664.55	8263.88	2304.18	2727.49	5004.05	2539.56	2456.61	2518.45	805.966	1309.77	2084.42	616.851	848.786	2528.25	2495.63
255	tr|A2J422|A2J422_HUMAN	Anti-HER3 scFv (Fragment) OS=Homo sapiens OX=9606 PE=2 SV=1	415.127	1788.42	691.536	1751.52	8534.59	1759.62	9123.67	8457.56	297.295	383.744	10012	2712.88	3855.08	2212.5	286.753	994.392	328.859	776.747	566.223	781.22	2900.8	964.093	6678.91	3016.2	2008.11	1624.89	1671.77	5409.8	8887.46	769.784	3416.56	5545.68	2204.1	1471.17	438.267	1918.04	19457.2	821.298	698.562	1900.03	20075	196.796	13089.3	23699.4	2081.31	9216.33	14372.8
256	tr|A0A5C2FY76|A0A5C2FY76_HUMAN	IGL c575_light_IGKV1-12_IGKJ4 (Fragment) OS=Homo sapiens OX=9606 PE=2 SV=1	540.11	644.608	1482.53	191.058	410.79	189.753	792.802	1107.83	98.644	1060.42	1400.31	954.498	1080.56	187.852	869.539	466.344	806.315	261.821	727.763	1799.54	273.012	1659.93	875.986	474.446	762.635	1068.58	244.023	573.429	1465.1	1010.2	552.353	946.361	769.179	760.568	935.814	349.721	582.196	1836.1	1426.77	547.04	458.017	2002.57	254.356	1883.7	1500.41	1457.8	358.938
257	tr|A0A2Y9CYD6|A0A2Y9CYD6_HUMAN	Ig heavy chain variable region (Fragment) OS=Homo sapiens OX=9606 GN=IgH PE=2 SV=1	812.15	596.587	1956.39	3149.24	2578.68	1484.69	349.99	4573.76	1827.35	1973.89	2852.88	1309.16	4659.46	924.296	1180.54	1229.22	1305.69	1900.48	5829.94	1881.94	2693.88	1777.11	3477.61	5631.92	282.569	2368.69	4032.37	3339.93	397.668	1089.68	10062.8	6361.34	1413.71	2714.98	5924.43	4949.07	3274	3716.51	2863.97	2519.44	484.832	1000.9	735.572	1138.57	339.973	4083.32	4963.7
258	tr|A0A5C2GKT3|A0A5C2GKT3_HUMAN	IG c912_light_IGKV4-1_IGKJ5 (Fragment) OS=Homo sapiens OX=9606 PE=2 SV=1	1482.01	1343.89	775.761	2191.4	2787.36	2835.14	4319.71	3812.34	532.129	2728.98	476.219	2109.37	1531.98	1160.33	441.548	774.418	651.393	1238.74	1599.8	1423.41	1290.78	1601.8	1308.65	1283.8	643.627	1244.9	273.334	643.852	1590.7	822.708	1585.79	1425.22	1395.15	2095.19	645.786	1630.89	309.908	1539.29	1274.53	1157.36	342.076	315.404	588.674	462.314	488.143	1985.87	1857.18
259	tr|A0A5C2FUE0|A0A5C2FUE0_HUMAN	IGL c608_light_IGKV1D-39_IGKJ2 (Fragment) OS=Homo sapiens OX=9606 PE=2 SV=1	18099.5	16700	4107.16	3289.21	7854.96	3056.99	8289.74	9595.26	5295.16	5541.36	3429.29	3405.37	3144.71	2571.21	3590.86	606.411	612.755	1443.77	7184.77	8905.08	3803.75	4420.64	6629.77	7333.98	5839.05	4548.12	4655.5	3099.56	1886.57	2974.32	4372.68	6904.72	6562.75	7206.6	7066.25	5435.75	17837.6	10732.1	5822.85	8376.36	2573.52	1541.34	1657.56	658.926	633.402	4453.6	937.148
260	tr|A0A5C2GV66|A0A5C2GV66_HUMAN	IG c1455_light_IGKV1D-39_IGKJ1 (Fragment) OS=Homo sapiens OX=9606 PE=2 SV=1	553.526	835.367	2356.87	2789.94	1640.4	1488.11	422.428	585.178	1028.89	1334.13	871.579	1151.05	731.443	605.686	2348.91	889.504	347.017	294.051	283.06	1048.85	2100.26	166.506	1002.24	2489.72	3765.19	1456.4	1013.32	1251.47	980.499	1212.43	1632.26	1286.45	3482.23	2277	1669.48	1634.03	3104.08	162.604	1197.94	2072.87	546.574	1477.91	448.277	385.871	183.928	1109.03	1175.75
261	tr|A0A7S5BYM1|A0A7S5BYM1_HUMAN	IGH c731_heavy_IGHV1-69_IGHD1-26_IGHJ4 (Fragment) OS=Homo sapiens OX=9606 PE=2 SV=1	11576.3	11970.8	10589.2	12611.3	16533.9	16149.2	35982.1	39243.1	16942.2	17502	28106.7	27061.4	16861	15788.9	10187.3	6188.84	5452.11	967.096	1511.27	3578.07	2445.19	2706.79	30381.7	32461	14901.6	17003.4	12313.2	12837.6	22830.2	12789.9	25017.2	24919.3	29971.7	31102.2	7909.81	8706.12	7761.6	12325.8	7007.45	6610.42	1898.25	1384.34	916.416	1669.67	1601.7	6370.76	5343.79
262	tr|A0A5C2G5E2|A0A5C2G5E2_HUMAN	IGL c3760_light_IGLV3-25_IGLJ2 (Fragment) OS=Homo sapiens OX=9606 PE=2 SV=1	3580.26	3041.08	10774.2	27067.7	5261.24	12042.9	15634.1	16980.8	10208.6	15448.9	1056.12	2741.13	11537.8	33682.1	4742.22	13620.9	1720.62	2162.78	9393.59	12760.4	2154.51	4357.68	10455.9	4799.58	19054.4	14655.9	12160.5	9136.86	10182.1	12172.3	364.05	10328.1	6826.28	7280.18	2431.14	16769.2	19610.7	12478.9	8500.82	572.25	23622.4	17032.8	15781.5	9054.23	8752.55	25238.5	32938.7
263	tr|A0A5C2GKA9|A0A5C2GKA9_HUMAN	IG c293_heavy_IGHV3-48_IGHD2-2_IGHJ4 (Fragment) OS=Homo sapiens OX=9606 PE=2 SV=1	6923.24	9150.62	3683.28	591.557	2145.22	5467.68	8370.09	16001.6	8630.84	769.881	2335.08	750.451	3052.46	12089.7	1500.06	2666.66	7192.92	5490.76	8615.44	1874.65	5742.25	1954.96	1519.63	1223.04	5334.01	4422.78	723.32	21021.1	2013.85	3258.18	4492.61	5055.83	3868.95	1307.94	2341.43	775.641	6659.58	4049.15	1504.16	5148.46	2134.95	1133.92	964.821	930.077	878.277	13587.5	12854.5
264	tr|E9PFZ2|E9PFZ2_HUMAN	Ceruloplasmin OS=Homo sapiens OX=9606 GN=CP PE=1 SV=1	694.912	892.984	1670.38	1131.26	498.017	1599.38	98372.8	101798	196.903	368.87	1850.78	1634.15	495.781	2326.9	1808.09	2344.65	921.109	389.618	2267.37	2325.69	1899.29	457.581	1603.85	695.505	1727.3	479.281	2029.6	1445.71	1298.19	1219.25	748.715	1601.2	1599.45	1660.39	1943.83	452.43	2419.81	1163.28	83024.4	85225.1	1126.75	703.537	995.16	782.025	1057.95	1441.63	1789.68
265	tr|Q5EFE5|Q5EFE5_HUMAN	Anti-RhD monoclonal T125 gamma1 heavy chain OS=Homo sapiens OX=9606 PE=1 SV=1	37659.5	39446.4	17171.1	20006.8	8427.82	3147.54	16063.1	15842.7	13917.9	16016.2	10511.6	12820.9	9628.03	8309.29	13001.4	12858.9	4758.32	3332.99	12484.8	14391.6	13119.3	12674.3	12452.8	9085.77	19381.7	17328.9	8199.98	9261.11	6648.52	3999.17	3913.66	13222.3	22019.3	21451.1	3282.99	5763.32	16998.8	14224.9	12005.6	1090.37	2684.27	3201.31	2312.26	969.357	68.8779	8292.22	6063.79
266	tr|Q6N094|Q6N094_HUMAN	Uncharacterized protein DKFZp686O01196 OS=Homo sapiens OX=9606 GN=DKFZp686O01196 PE=2 SV=1	418728	446032	5348.7	3338.69	1122.28	1455.95	449.946	1091.96	930.028	1833	401.377	606.333	955.254	942.32	346.253	390.134	447.466	174.752	1094.14	745.496	521.715	322.316	295.227	704.512	736542	752732	5187.12	3450.9	1453.86	512.192	531.831	608.559	834.194	616.398	699.575	494.247	496.522	176.093	606.47	1333.5	895.979	1047.46	468.843	1532.17	1401.26	1233.32	1887.78
267	sp|P02774|VTDB_HUMAN	Vitamin D-binding protein OS=Homo sapiens OX=9606 GN=GC PE=1 SV=2	3395.43	3322.47	4982.78	1523.59	1877.68	3668.34	3578.43	4520.75	37509.2	40149.4	6299.58	5632.68	1336.49	2322.52	40999.8	50780.7	789.173	1476.21	2576.04	1518.54	5296.77	2661.42	1894.92	3257.84	2552.19	821.249	43139.9	43101.5	1384.86	2009.77	3142.61	4888.5	3143.1	4541.13	985.324	2534.6	3220.96	3456.3	32448.3	36161.3	41578.1	47441.4	31881.5	56733.8	51402.3	47947.6	50846.1
268	tr|B4E1D8|B4E1D8_HUMAN	cDNA FLJ51597, highly similar to C4b-binding protein alpha chain OS=Homo sapiens OX=9606 PE=2 SV=1	44617.3	39940.6	1616.76	581.946	19272.5	21052	5516.89	471.381	15234.7	8980.91	13446	16979.7	4005.73	12263.2	8435.08	5426.37	8486.36	12532.6	8407.62	6474.52	9077.16	10251.2	12140.9	5973.76	9475.8	5213.73	2442.3	6302.45	4544.17	389.882	7304.35	933.759	26853.5	24186.3	6017.36	370.814	2072.76	10145.6	20011.9	21562.5	1281.54	498.528	1270.94	4135.02	2361.7	11744.8	3517.01
269	tr|B2R6W1|B2R6W1_HUMAN	cDNA, FLJ93143, highly similar to Homo sapiens complement component 7 (C7), mRNA OS=Homo sapiens OX=9606 PE=2 SV=1	4424.8	4128.46	1257.57	4580.02	2908.49	7525.14	2223.5	6072.94	3749.83	2649.18	5470.91	8136.29	3254.09	3806.78	4051.28	1370.85	8005.22	9231.13	3118.99	1354.41	3530.49	4201.07	772.989	4430.09	2553.82	956.658	1993.12	7085.5	5923.69	5117.95	19451.3	14949.3	4632.16	2515.4	6936.36	7549.36	15176.4	11222.8	4487.49	2603.37	1237.51	6065.53	2593.1	2128.5	2700.69	2207	1918.23
270	sp|P0DJI8|SAA1_HUMAN	Serum amyloid A-1 protein OS=Homo sapiens OX=9606 GN=SAA1 PE=1 SV=1	1335.3	7140.25	19660.2	20922.4	18571.1	17888.1	118162	120399	4779.43	2112.88	106381	114422	2679.39	5216.09	2588.23	3444.9	436.81	5323.38	3028.21	3270.69	3147.03	1998.08	215303	222892	42327.3	47744.8	30435.2	24617.6	21441.8	21326.9	37168.1	37080.7	5871.39	17731.3	135218	138796	546389	469521	14653.3	19704.5	865699	740433	809860	772438	900070	326026	321080
271	sp|Q03591|FHR1_HUMAN	Complement factor H-related protein 1 OS=Homo sapiens OX=9606 GN=CFHR1 PE=1 SV=2	7659.9	24367.5	18004.1	23145.3	17577.9	10416.4	9242.81	19863.8	3950.4	6916.42	9425.24	22376.2	10182.2	6179.88	28848.2	12828.6	9432.7	4759.59	19267.6	9026.45	25140.6	23418	7675.56	7625.63	15521.1	8925.14	7858.99	11856.2	19492.6	17097	16523.8	20466	23425.5	14113.7	29230.2	28754.8	16592.7	23980.4	20623.2	6617.91	13938.9	8976.71	5616.51	8093.3	9391.31	15698.1	5958.19
272	tr|A0A5C2FVL3|A0A5C2FVL3_HUMAN	IGL c216_light_IGKV3-20_IGKJ1 (Fragment) OS=Homo sapiens OX=9606 PE=2 SV=1	12219	9866.62	12581.3	15467.1	14489.4	14712	25400.3	28406.2	25411.7	22616.4	16951.2	17941.1	12573.7	12147.6	3179.37	3532.82	2746.22	709.217	10164.7	9736.78	22459.4	22147.4	18229.5	16142.7	44648.6	45219.8	13797.1	14719.3	4930.55	5394.42	13318.3	11876.6	21645	24246.8	6817.21	6664.82	21862.8	17035.5	17554.6	18923.6	9574.87	6626.59	8291.94	7961.28	9342.76	85454	79405.9
273	tr|A0A5C2GH52|A0A5C2GH52_HUMAN	IGH + IGL c65_heavy_IGHV5-51_IGHD5-24_IGHJ5 (Fragment) OS=Homo sapiens OX=9606 PE=2 SV=1	2170.8	2385.5	3645.81	3913.2	2056.74	484.257	2088.36	2677.07	3426.46	3212.02	2681.18	1308.41	581.066	2276.29	1731.26	900.87	473.745	701.511	2910.23	1580.57	672.896	1476.78	1459.7	2953.13	374.265	2225.31	2062.37	1874.18	720.34	2135.18	1712.6	4484.6	2642.31	3689.37	2080.85	1202.54	3658.01	3855.75	3497.91	1804.81	880.021	463.597	1186.74	254.51	808.773	3495.04	6066.22
274	tr|A0A5C2GS46|A0A5C2GS46_HUMAN	IG c1300_heavy_IGHV3-15_IGHD3-3_IGHJ6 (Fragment) OS=Homo sapiens OX=9606 PE=2 SV=1	625.263	2096.43	537.985	502.766	121.732	1586.83	2523.08	645.524	3129.99	320.583	2559.1	1664.61	210.183	1517.7	6117.59	413.648	5078.06	6490.18	275.717	1936.35	2098.04	5319.15	359.633	493.039	2243.16	1953.39	295.525	5416.63	1437.15	741.668	238.491	4869.25	1497.99	9547.34	1061.38	498.485	9627.69	8746.99	473.061	2833.01	2556.61	267.031	2137.51	492.676	2652.12	77134.9	69190.9
275	tr|A0A7S5C378|A0A7S5C378_HUMAN	IGH c3373_heavy_IGHV1-2_IGHD5-24_IGHJ5 (Fragment) OS=Homo sapiens OX=9606 PE=2 SV=1	1006.58	2261.55	1764.05	2556.73	4777.06	7739.96	6914.9	10361	1318.66	2008.99	7130.42	19529.9	353.109	524.733	15472.8	477.139	1300.2	970.173	842.307	1425.35	20521.1	1868.59	876.208	0	1221.35	404.871	1121.98	885.361	3852.41	3064.75	132.408	1825.79	655.819	2503.17	259.383	159.025	3121.3	1733.19	1774.46	0	23682.9	3908.11	7540.88	0	0	7522.22	3739.29
276	tr|A0A125U0U6|A0A125U0U6_HUMAN	MS-A4 light chain variable region (Fragment) OS=Homo sapiens OX=9606 PE=2 SV=1	2208	3305.97	1306.33	2638.54	8251.73	10939.1	2262.97	6436.67	2920.25	1338.13	3678.31	2716.81	2210.96	2593.36	1913.51	565.808	1397.93	565.289	3727.88	1393.49	4723.14	6812.93	2370.85	3493.24	2864.72	2428.2	3212.73	2076.39	2136.25	2501.36	3065.97	1819.02	3036.89	4393.49	2164.88	1020.25	11580.6	5828.9	5428.13	2285.16	2020.66	1525.14	1460.72	1409.2	2110.3	4363.1	3289.03
277	tr|A0A7S5C3S7|A0A7S5C3S7_HUMAN	IGH c3611_heavy_IGHV3-43_IGHD3-16_IGHJ4 (Fragment) OS=Homo sapiens OX=9606 PE=2 SV=1	2220.99	2188.84	1722.81	2094.03	2053.83	5168.6	9759.77	6230.14	15206.5	15037.1	3673.28	291.005	4774.16	1944.36	1039.03	888.022	2100.48	4115.48	722.501	7222.92	8095.37	5662.24	17375.8	24672.1	1669.31	7576.14	13124.6	14298.6	3132.62	4268.07	6379.06	8350.79	5430.06	9831.23	13914.2	12846	11905.3	2118.65	10211.1	7111.38	866.773	563.523	436.825	408.925	2021.56	3216.85	895.394
278	tr|A0A5C2GD80|A0A5C2GD80_HUMAN	IG c1148_heavy_IGHV1-2_IGHD2-15_IGHJ6 (Fragment) OS=Homo sapiens OX=9606 PE=2 SV=1	728.089	472.913	1220.8	875.854	1372.96	2471.65	408.819	1561.67	2808.49	1693.51	261.292	203.085	621.516	451.28	1087.56	618.566	951.899	611.039	762.252	300.755	348.764	1376.03	1471.18	1877.65	279.996	1773.2	996.341	1260.91	1440.74	913.208	1337.57	628.762	394.769	109.383	2591.17	2346.7	639.578	1021.08	688.779	497.786	382.479	508.942	574.507	284.775	846.362	1201.1	779.864
279	tr|A0A5C2GDX1|A0A5C2GDX1_HUMAN	IGH + IGL c119_heavy_IGHV3-30_IGHD4-17_IGHJ4 (Fragment) OS=Homo sapiens OX=9606 PE=2 SV=1	608.426	1385.86	2667.28	3257.64	1451.29	472.389	3931.28	3942.37	1479.69	821.198	364.362	384.765	1907.68	2004.73	461.447	1420.56	205.085	320.721	1398.66	1171.48	1283.44	902.837	1339.29	948.216	1317.52	526.294	1462.48	1275.23	214.313	604.637	4298.44	4833.48	1887.45	2259.77	807.48	182.337	684.549	526.978	670.516	1385.71	825.84	1326.43	1387.6	1163.91	431.571	840.196	192.079
280	tr|A0A5C2GR58|A0A5C2GR58_HUMAN	IG c1383_heavy_IGHV3-7_IGHD3-22_IGHJ5 (Fragment) OS=Homo sapiens OX=9606 PE=2 SV=1	963.152	2230.88	1285.04	3076.06	1399.33	1404.29	2053.41	3952.09	4037.48	2985.52	2925.87	1439.88	1913.31	913.209	3749.87	4647.48	1658.67	185.095	4212.5	479.971	135.163	2976.03	4185.77	1762.32	4698.84	2315.68	2183.13	883.155	159.015	821.198	560.195	2802.58	2562.85	2366.35	2635.04	1948.68	1365.75	1212.01	2805.59	1991.28	1816.04	250.912	1314.7	1172.35	440.79	3278.32	3125.52
281	tr|A0A5C2GGE4|A0A5C2GGE4_HUMAN	IG c769_heavy_IGHV4-61_IGHD3-16_IGHJ6 (Fragment) OS=Homo sapiens OX=9606 PE=2 SV=1	711.536	1383.73	1742.44	2436.7	1009.86	1972.1	3312.16	3069.01	1996.95	1048.46	1594.27	1990.6	1716.97	860.175	3296.51	2497.45	1428.3	2746.24	2680.37	745.297	811.676	2248.4	1292.54	932.436	2757.71	4706.04	1877.64	1023	2090.44	1014.02	312.076	2544.72	3216.62	2347.16	2641.84	2058.16	622.667	700.532	2329.18	794.287	892.711	879.825	3017.09	1299.36	1706.95	2194.73	1588.34
282	tr|A0A5C2G7I4|A0A5C2G7I4_HUMAN	IGH c572_heavy__IGHV3-21_IGHD5-18_IGHJ5 (Fragment) OS=Homo sapiens OX=9606 PE=2 SV=1	183.603	1345.44	297.448	1218.41	3069.89	3500.66	7038.03	8298.78	2971.83	1917.38	1465.97	1346.04	439.224	974.247	349.262	79.8784	715.171	428.634	2044.49	3200.72	3181.39	3309.66	3121.81	1464.27	2320.96	2290.29	700.819	4049.25	1965.83	1925.71	1071.18	2265.94	1867.5	134.601	3721.26	3975.4	4728.32	4240.49	78.1771	673.865	1028.21	973.903	419.33	1011.13	674.24	9779.31	6186.12
283	tr|A0A7S5C5A9|A0A7S5C5A9_HUMAN	IGH c3957_heavy_IGHV3-33_IGHD3-10_IGHJ6 (Fragment) OS=Homo sapiens OX=9606 PE=2 SV=1	31312.3	25809.5	18679.2	19759	24387.7	32541	66026.6	69695.7	64946.7	59345.6	32973	27511.5	18237.3	14160.1	9555.71	1794.41	5283.77	873.144	34180.1	32523.5	23169.4	15071.2	41351.5	32698.9	35919.5	32076.2	23754.5	26463	28670.7	28447.4	43010.1	46907.6	57869	60443.8	21347.7	15288.9	74134.2	65262.7	16897.6	18025.7	8996.91	11098.8	11647.2	10669.8	7958.53	56515.1	47411.5
284	tr|A0A5C2GII9|A0A5C2GII9_HUMAN	IG c1081_light_IGKV1-8_IGKJ4 (Fragment) OS=Homo sapiens OX=9606 PE=2 SV=1	2123.81	2827.47	1291.02	4054.46	1895.33	3727.19	2749.12	2853.22	2181.15	638.598	800.041	2503.96	1024.42	2527.6	1844.96	3543.55	943.143	857.044	3722.47	2421.7	3117.09	1363.38	3016.35	1722.26	2440.19	2379.26	2790.46	1145.25	4568.7	3816.77	5574.42	6329.45	1424.38	4011.64	2651.54	2258.55	1592.15	1884.46	5802.67	5914.19	1898.93	1812.84	2586.19	1526.36	1601.76	4298.88	3500.54
285	tr|A0A5C2GGI4|A0A5C2GGI4_HUMAN	IG c750_heavy_IGHV5-51_IGHD6-19_IGHJ4 (Fragment) OS=Homo sapiens OX=9606 PE=2 SV=1	4929.23	1791.21	3473.33	3271.05	3592.53	2146.35	9720.62	2893.96	919.444	3495.33	689.524	3792.86	5448.24	2527.04	2669.03	4959.7	3073.66	3578.86	3917.47	6074.68	2535.14	4700.49	2466.87	1616.71	2068.93	2125.67	4356.51	5782.92	2427.83	3078.74	6000.71	6121.58	2097.91	4215.15	6962.51	6169.6	2791.5	1862.6	4629.1	1929.84	1815.62	646.669	411.974	1651.27	1979.89	733.164	1209.99
286	tr|A0A7S5C078|A0A7S5C078_HUMAN	IGH c724_heavy_IGHV1-69_IGHD3-22_IGHJ4 (Fragment) OS=Homo sapiens OX=9606 PE=2 SV=1	791.028	441.696	664.223	3832.78	3475.47	3796.95	1882.75	2186.93	4171.31	4092.57	2308.52	609.782	1589.58	4945.11	3815.41	801.581	4080.02	4369.28	1123.69	6931.68	2063.02	5787.62	3402.23	1426.42	5523.72	6106.22	564.496	4141.73	1677.03	723.399	1200.35	576.948	5711.32	4288.26	4408.78	2497.25	2310.77	205.859	2630.28	3444.4	1176.46	963.869	1169.79	2306.77	1226.66	574.586	359.138
287	tr|A0A5C2G978|A0A5C2G978_HUMAN	IGH + IGL c390_heavy_IGHV1-8_IGHD2-2_IGHJ5 (Fragment) OS=Homo sapiens OX=9606 PE=2 SV=1	4875.66	3171.62	3746.62	6228.07	9726.27	11573.9	14117.3	15496.9	6492.08	8363.29	6048.3	6932.2	4336.16	6895.2	3217.27	2194.85	2425.76	854.028	7188.11	3442.92	7807.59	8632.35	11084	11555.7	9184.64	9708.57	10058.8	9207.04	360.916	4704.63	7721.92	7952.41	12824.6	12171.5	5166.96	3771.09	6929.68	7225.15	9147.37	743.381	1374.46	1254.44	260.164	820.389	203.86	5179.81	6143.59
288	tr|A0A5C2FXZ8|A0A5C2FXZ8_HUMAN	IGL c1524_light_IGKV4-1_IGKJ1 (Fragment) OS=Homo sapiens OX=9606 PE=2 SV=1	57583.6	57109.7	8244.59	11111.1	8538.28	8036.41	13810.5	16078.7	8414.55	10940.3	4576.6	3734.72	3526.18	7990.36	3177.88	7249.87	1669.72	2658.23	5571.9	7764.9	13270.2	4605.7	1834.79	4646.64	10975	9277.7	4682.29	6610.51	2136.3	1694.37	13014.3	13887.5	23821.7	18911	4528.85	3638.14	16746.5	14954.1	10005.7	9149.93	2147.94	1555.21	2824.32	1318.19	1463.17	14932.9	1891.2
289	tr|A0A7S5C3D4|A0A7S5C3D4_HUMAN	IGH c3463_heavy_IGHV1-69_IGHD3-22_IGHJ4 (Fragment) OS=Homo sapiens OX=9606 PE=2 SV=1	19106.2	1055.6	20906.8	20759.3	16143.6	8364.32	10813.6	3799.82	37888.6	529.541	9497.44	11499.1	14533.5	12435.2	2579.78	18523.2	9662.66	8463.35	54638.9	22251	26667.7	1663.57	2428.67	16567.5	18312.4	15925.2	2536.17	1883.23	7317.69	19999.7	6197.06	7075.63	13456.6	16527.8	10641.2	3191.15	11442.2	53424.4	753.235	8150.99	10358.6	3939.47	14259.8	8753.59	8093.24	9608.89	8850.14
290	tr|A0A5C2G1A6|A0A5C2G1A6_HUMAN	IGL c1715_light_IGKV1-27_IGKJ1 (Fragment) OS=Homo sapiens OX=9606 PE=2 SV=1	1509.89	1366.79	422.672	755.229	3691.69	4236.52	2741.58	5308.43	6827.52	3974.92	1385.75	2746.3	745.672	2091.35	579.34	1713.59	344.057	874.884	1408.03	2831.28	4368.37	4086.9	731.86	2912.25	6830.11	2388.31	1534.03	5386.1	5352.37	1950.63	4841.8	4076.06	4040.14	4222.82	8317.69	3826.93	6122.54	5063.59	962.161	4805.17	3118.31	3932.92	240.46	3136.16	940.285	630.519	487.093
291	tr|A0A5C2GH70|A0A5C2GH70_HUMAN	IG c941_heavy_IGHV3-7_IGHD3-3_IGHJ6 (Fragment) OS=Homo sapiens OX=9606 PE=2 SV=1	6812.43	6980.68	595.728	2319.79	2274.5	2265.55	30137.9	31674.5	6510.66	4607.27	3200.54	5758.74	2509.79	6637.57	2312.97	5791.86	648.344	1809.27	3732.33	3142.28	11610.3	9086.41	1592.54	4695.7	9273.37	6282.54	4277.47	5031.88	4465.37	2924.68	7156.03	7200.53	5892.09	8429.4	10423.3	7258.01	3556.43	2137.22	6642.69	6196.65	999.398	810.263	310.653	694.96	883.661	2023.84	1348.31
292	tr|A0A5C2GE06|A0A5C2GE06_HUMAN	IGH c231_heavy__IGHV3-11_IGHD3-10_IGHJ4 (Fragment) OS=Homo sapiens OX=9606 PE=2 SV=1	9912.75	10543	14486	10946.2	15072.1	16138.3	28076.2	24236.9	6153.95	7312.26	16820.1	14789	12073	11535.7	4517.59	4678.34	1888.99	2993.64	17404	12274.9	14601	14203.5	15761.2	16270	12404.2	14895.7	7039.83	7826.13	575.291	6850.99	13251.9	12712.8	34482.6	37634.9	5853.35	5643.91	20459.6	17459.7	20790.2	23910.6	4081.44	3586.79	3506.3	4289.51	2216.07	40079.5	4292.67
293	tr|A0A5C2G6Y8|A0A5C2G6Y8_HUMAN	IGL c148_light_IGLV2-18_IGLJ3 (Fragment) OS=Homo sapiens OX=9606 PE=2 SV=1	5758.72	1378.63	10057.7	2071.11	1770.06	6109.14	7935.93	15413.9	4097.72	3270.52	2079.67	6655.33	15568.3	17382.1	4059.93	5841.71	4035.94	5053.47	6181.36	2200.62	1235.9	3338.88	9407.68	8589.11	8630	7535.24	2770.18	3499.64	5690	5990.13	5856.7	5406.39	10070.6	8913.83	3661.98	1958.48	13080	9386.68	6602.22	5073.17	11573.4	9548	421.807	3812.51	6023.16	25683.4	26766.4
294	tr|A0A7S5C4H2|A0A7S5C4H2_HUMAN	IGH c1750_heavy_IGHV3-49_IGHD3-9_IGHJ6 (Fragment) OS=Homo sapiens OX=9606 PE=2 SV=1	523.612	1443.32	1206.95	333.726	1596.58	2183.09	4027.22	2995.94	1452.66	1062.56	5274.46	5356.74	1567.23	1475.79	982.562	309.272	645.738	286.806	2029.92	1124.63	806.472	1062.63	1733.62	1776.58	1650.24	2068.36	1805.04	2164.6	716.657	934.843	2405.03	1901.08	1588.95	3130.83	919.486	480.981	2179.34	2370.81	1043.01	1015.69	169.988	443.891	228.907	109.915	301.487	317.595	739.296
295	tr|A0A7S5BZY8|A0A7S5BZY8_HUMAN	IGH c1014_heavy_IGHV3-74_IGHD5-24_IGHJ4 (Fragment) OS=Homo sapiens OX=9606 PE=2 SV=1	775.723	377.337	452.54	386.312	310.113	849.973	639.377	173.596	1144.02	1321	220.122	193.638	758.833	552.574	1032.94	291.109	414.953	316.229	549.574	660.015	1024.5	951.844	602.788	507.581	1910.42	407.422	1456.42	510.157	744.954	284.967	348.206	574.07	806.917	1157.49	936.701	924.727	1017.33	1502.47	997.473	1909.21	327.206	140.559	184.93	322.202	168.931	7867.54	10912.5
296	tr|A0A7S5BYB0|A0A7S5BYB0_HUMAN	IGH c432_heavy_IGHV4-59B_IGHD3-9_IGHJ4 (Fragment) OS=Homo sapiens OX=9606 PE=2 SV=1	9392.45	9478.54	5285.11	7340.23	8916.69	7464.12	23365.1	26240.2	17179.7	19627.8	8104.69	7713.99	7700.09	6974.84	17460.2	15243.4	11161.2	9814.52	24536.9	20137.6	22695.8	22695.4	14387.5	12930.4	16752.2	17950.6	26760	30409.2	7030.69	7915.03	10556.2	9952.4	15801.4	17554.8	9786.58	11429	16509.8	15267.6	16127	13457.5	3750.26	3860.89	15388.1	2191.32	548.691	17611.2	13435.4
297	tr|A0A5C2GYF7|A0A5C2GYF7_HUMAN	IG c1647_heavy_IGHV3-23_IGHD5-24_IGHJ4 (Fragment) OS=Homo sapiens OX=9606 PE=2 SV=1	309.767	2332.86	842.087	974.86	831.759	1106.4	2687.07	2504.71	2372.28	2074.99	813.279	1298.26	1080.51	411.94	1293.13	1015.25	712.449	516.812	1779.36	569.726	3082.35	1969.45	2323.17	1521.49	9203.52	8589.32	2615.69	3293.83	778.244	346.698	988.418	148.918	2466.27	5292.38	994.847	175.718	3130.97	2395.38	2652.43	1349.59	547.239	738.897	190.497	181.113	121.164	3444.12	2814.03
298	tr|A0A5C2GR37|A0A5C2GR37_HUMAN	IG c1363_heavy_IGHV3-33_IGHD3-16_IGHJ4 (Fragment) OS=Homo sapiens OX=9606 PE=2 SV=1	7880.2	8913.71	14310.2	12962.3	17273.7	20015.2	26423.2	31973	15286.9	17223.3	13166.6	13388.2	6407.21	5953.15	1513.7	5557.01	3223.39	2320.92	7447.07	6809.8	18034	16458.5	18857.6	20878.4	15478	14865.7	9416.3	11703.9	12561.1	12037.5	20663.7	23990.5	20917.5	20211.9	12696	10844.2	13955.6	15884.7	10901.4	14004.3	4622.13	3050.94	3829.09	3374.27	2586.82	32498.8	30935.5
299	tr|A0A2U8J8T6|A0A2U8J8T6_HUMAN	Ig heavy chain variable region (Fragment) OS=Homo sapiens OX=9606 GN=IgH PE=2 SV=1	155.002	1595.95	3497.2	1219.78	1027.96	1895.01	1372.38	2825.79	2930.24	553.234	968.155	5964.77	2712.6	2891.64	2674.09	7913.6	2141.05	3770.02	4466.16	3750.96	4063.25	431.154	1256.61	454.021	486.462	567.947	4604.12	3364.94	5015.43	1628.41	172.287	1296.47	380.026	1734.37	269.559	2029.03	2627.83	1088.98	540.57	1433.78	1466.11	1556.09	2063.07	267.865	3354.37	516.956	908.741
300	tr|A0A7S5EUU9|A0A7S5EUU9_HUMAN	IGH c1395_heavy_IGHV4-59B_IGHD5-24_IGHJ5 (Fragment) OS=Homo sapiens OX=9606 PE=2 SV=1	1913.94	2249.15	3136.04	4148.58	1458.91	1864.96	3876.06	4885.61	2807.31	3699.3	1574.29	1087.22	2483.47	3256.87	3516.71	510.966	1192.16	1524.26	1283.97	895.929	1516.54	2056.45	1408.12	1758.85	2502.41	3631.21	1655.43	2135.12	1752.14	786.067	1628.89	1915.87	2162.28	1553.67	1258.36	936.529	3486.52	619.003	2574.03	2602.41	567.849	513.157	1607.02	679.667	770.926	1662.08	1707.51
301	tr|A0A5C2G6F4|A0A5C2G6F4_HUMAN	IGH c590_heavy__IGHV1-2_IGHD1-26_IGHJ4 (Fragment) OS=Homo sapiens OX=9606 PE=2 SV=1	2008.84	1415.28	3515.05	3216.1	5052.02	9320.17	14629.7	14342.3	211.375	6386.44	5074.48	4247.39	2809.5	3823.55	3057.37	1536.95	1658.1	1340.76	4362.8	5955.78	5259.8	5553.81	8298.87	8063.51	5819.07	5663.43	4131.31	4018.88	439.267	2829.42	9190.39	9288.89	9306.99	11300.9	1635.64	3418.13	3733.23	6285.7	11553.5	10674.2	523.8	583.264	1104.65	336.756	130.124	5532.27	4668.17
302	tr|A0A5C2G7P5|A0A5C2G7P5_HUMAN	IGH c537_heavy__IGHV1-46_IGHD1-26_IGHJ5 (Fragment) OS=Homo sapiens OX=9606 PE=2 SV=1	714.815	1731.42	1529.92	1242.36	1766.83	2923.44	1236.72	635.651	1520.65	2130.03	1939.6	536.243	2158.07	2068.18	230.782	438.135	154.713	1683.41	874.967	878.813	230.693	376.773	1124.92	2141.11	1468.13	1275.53	1310.74	1342.43	3085.23	4253.09	2809.24	2609.72	2616.69	2639.71	1282.26	1114.99	1335.96	974.865	1157.88	975.1	293.147	518.403	348.523	876.37	278.06	1020.05	1474.92
303	tr|A0A5C2G420|A0A5C2G420_HUMAN	IGL c3869_light_IGKV2D-40_IGKJ2 (Fragment) OS=Homo sapiens OX=9606 PE=2 SV=1	5328.99	6217.97	1626.56	943.235	5134.09	3584.48	9530.65	5423.27	7239.54	8930.73	3810.55	3207.24	4997.05	4316.1	624.742	2450.13	312.808	1376.96	3258.88	3740	4138.44	4952.83	2400.98	2236.51	3275.63	1025.52	5342.06	4271.82	867.21	1350.15	7878.67	7601.13	6626.53	5280.67	2878.14	2744.83	6482.05	3335.55	3801.56	5630.26	1258.46	818.835	1081.8	1964.15	972.197	2192.5	2068.83
304	tr|A0A5C2GJF3|A0A5C2GJF3_HUMAN	IG c1186_heavy_IGHV3-20_IGHD6-13_IGHJ6 (Fragment) OS=Homo sapiens OX=9606 PE=2 SV=1	646.034	231.404	775.417	728.401	437.731	2029.77	867.675	1198.77	406.301	835.075	417.57	447.999	256.134	1464.17	645.335	409.36	565.923	1067.03	891.3	352.281	835.505	571.277	586.738	246.931	528.123	499.491	681.84	731.9	330.71	288.728	18074.9	17430.6	204.442	873.737	367.598	241.363	461.175	132.139	453.661	735.143	857.602	1396.39	1050.02	782.238	603.828	699.029	201.092
305	tr|A0A5C2GHK1|A0A5C2GHK1_HUMAN	IG c1179_light_IGLV3-21_IGLJ3 (Fragment) OS=Homo sapiens OX=9606 PE=2 SV=1	874.413	1163.24	2374.38	1709.1	2362.14	2853.05	2708	2436.64	2331.63	1619.44	1298.7	663.125	2445.06	1221.32	940.941	1009.75	274.457	452.022	2107.4	1202.6	5928.41	4843.98	2910.49	3130.62	1300.53	1290.8	1484.47	1416.3	985.238	707.864	1510.32	841.553	4777.6	5026.29	1768.83	1867.2	3311.69	3937.39	2444.83	1439.81	1687.89	468.484	1741.13	839.656	891.552	685.222	1837.74
306	tr|A0A5C2GJL7|A0A5C2GJL7_HUMAN	IG c1174_light_IGKV6-21_IGKJ2 (Fragment) OS=Homo sapiens OX=9606 PE=2 SV=1	4448	4086.69	1949.61	2289.02	3815.37	1795.24	2596.65	5404.39	1633.76	3847.14	1118.28	944.794	4074.72	3945.67	1116.42	2132.94	1279.36	1048.86	1957.24	1284.4	511.057	2141.7	4524.04	7724.49	4826.77	6260.84	3126	6278.32	1019.34	1447.46	477.918	4238.39	3206.9	2459.58	844.596	1328.3	5970.72	4786.48	1979.26	3747.94	1088.29	844.73	658.905	414.008	245.179	671.453	2050.54
307	tr|A0A7T0PY07|A0A7T0PY07_HUMAN	Immunglobulin kappa chain variable region (Fragment) OS=Homo sapiens OX=9606 PE=2 SV=1	12421.8	13045.2	9667.49	9947.34	9962.57	11214	13356.7	12669.8	4752.81	3319.68	10775.2	8100.82	6803.59	7866.46	2090.94	578.932	8324.04	7908.29	3878.13	3861.5	15784.9	1289.2	6176.8	6201.43	13215.3	7881.01	3545.97	1997.31	12443.1	12100.9	14874.1	17234.6	9071.76	9635.69	13096	15940.8	17674.1	16473.4	18413.7	24684	12625.3	13384	12532.7	2262.94	3100.36	5840.96	5967.14
308	tr|A0A5C2FT87|A0A5C2FT87_HUMAN	IGL c191_light_IGKV2-30_IGKJ2 (Fragment) OS=Homo sapiens OX=9606 PE=2 SV=1	485.422	152.455	943.948	1374.31	23783.2	26126.3	541.4	546.299	1272.17	1286.98	264.604	256.78	537.746	835.395	1356.48	445.363	225.467	246.158	571.368	407.218	485.611	298.006	475.321	130.03	689.538	439.159	273.07	695.997	962.84	625.933	61.2982	3272.68	939.182	176.703	923.537	792.885	1156.15	486.162	809.087	113.044	388.438	424.788	247.914	586.828	336.381	950.26	236.335
309	tr|A0A5C2G8T7|A0A5C2G8T7_HUMAN	IGH + IGL c240_heavy_IGHV3-64_IGHD4-4_IGHJ6 (Fragment) OS=Homo sapiens OX=9606 PE=2 SV=1	2302.39	1714.37	12803.8	2438.87	13132.9	12455.5	16348.7	20909	1569.13	2620.46	8322.44	8653.02	5476.22	1715.99	2100.92	1670.44	1861.59	3018.71	1385.71	2739.31	5400.44	6031.96	3075.77	3137.35	1710.49	3606.83	3769.8	5276.55	9408.06	10162.2	9235.46	8558.3	11632.8	3098.36	4206.86	3302.77	8317.95	8141.98	15806.2	5520.04	15397.7	13138.9	693.277	1816.12	12632.9	16200.7	16183.4
310	tr|A0A5C2G3L4|A0A5C2G3L4_HUMAN	IGL c883_light_IGKV3-15_IGKJ1 (Fragment) OS=Homo sapiens OX=9606 PE=2 SV=1	1375.69	1718.58	3918.83	593.036	5124.14	6201.26	7834.1	1482.62	213.806	5121.17	1225.9	1768.41	3323.73	5012.05	1399.07	1379.92	1102.44	609.244	4357.3	2141.71	6582.88	5739.41	337.842	4922.22	703.496	4259.26	3247.9	2530.52	3109.43	1597.01	4794.9	5323.14	1375.12	6310.73	226.849	154.873	8850.59	960.145	7703.66	8680.62	2860.88	252.452	538.03	1953.2	2346.19	2868.54	905.655
311	tr|A0A5C2G5C9|A0A5C2G5C9_HUMAN	IGH c120_heavy__IGHV1-2_IGHD3-22_IGHJ4 (Fragment) OS=Homo sapiens OX=9606 PE=2 SV=1	2370.85	5510.66	1808.06	2197.41	39484.1	7792.47	5675.04	10529.8	324.083	3607	23080.5	747.324	1308.26	2080.25	1395.11	66751.7	2192.03	17658.1	1105.58	380.868	27540.1	3122.78	63759.3	945.331	701.276	7796.28	410.353	3031.45	6411.11	6657.89	17071.1	11512.5	3628.27	18034.1	42704.5	2288.51	75264.8	77123.1	8252.95	8877.03	1384	19195.6	6681	1342.76	2920.35	9110.22	5700.71
312	tr|A0A5C2GVI6|A0A5C2GVI6_HUMAN	IG c1327_light_IGLV2-23_IGLJ2 (Fragment) OS=Homo sapiens OX=9606 PE=2 SV=1	5712.31	7478	10529.1	8324.36	31207.2	39151.1	8241.07	6397.76	33749.3	36370.7	14909.5	20592.6	31711.5	32661.1	14099.2	13888.7	16102.9	17969.5	11210.7	13396.5	22765.2	26286.7	24261.1	28241.9	41504.7	46544	12918	16750.2	18181.6	14258.6	19633.5	17117.7	18944	20639.3	11529.1	7791.24	20514.6	15041.8	21080.8	20535.7	8873.4	3343.91	1479.41	1971.79	10521.1	18026	18003.5
313	tr|A0A1B1CYC5|A0A1B1CYC5_HUMAN	Vitamin D binding protein (Fragment) OS=Homo sapiens OX=9606 GN=Gc PE=4 SV=1	27633.5	27267.3	51094.4	56439.7	70361.8	78544.5	86544.1	82751.2	27793.4	31073.8	49650.4	53081.3	88184.4	89860.6	33714.6	35617.2	18836.7	20547.5	34112.6	36310.1	85808.9	86361.4	510.573	520.563	35255.6	34711.8	35057	38368.4	79744	77953.7	42515.1	49541.9	846.226	1216.01	50478.6	47469.1	60187.7	58075.8	24667.8	23262.4	914.589	363.577	376.14	615.736	2123.78	2761.23	410.352
314	tr|A0A5C2G5Z9|A0A5C2G5Z9_HUMAN	IGL c4040_light_IGKV3-20_IGKJ2 (Fragment) OS=Homo sapiens OX=9606 PE=2 SV=1	449.334	677.9	387.417	831.453	13794.1	15298.1	3329.96	2356.13	2022.88	655.808	1462.83	680.175	2016.1	1178.63	701.611	472.818	263.651	267.37	228.537	497.893	1074	1469.52	1036.49	751.854	1593.29	1532.21	1817.55	1027.66	1002.49	779.59	1202.03	2467.89	2927.17	2810.16	195.092	1066.02	253.913	763.342	436.581	1337.74	207.019	925.655	1211.75	1761.79	858.254	1136.44	2136.96
315	tr|A0A5C2GNU3|A0A5C2GNU3_HUMAN	IG c227_heavy_IGHV3-53_IGHD3-10_IGHJ4 (Fragment) OS=Homo sapiens OX=9606 PE=2 SV=1	16543.6	5521.56	7023.84	10296.7	16139.6	15829.6	16298.6	14982.4	7660.35	7916.88	18288.6	17037.5	16095.1	9453.23	13141.9	12309	7181.68	3186.06	23180.8	18209.3	36513.2	35230.6	13624.1	12235.2	10976.2	11600.5	13277.3	20333.3	7169.41	9375.55	16455.1	17045.2	21406.9	16535.8	4739.09	4237.63	17497.9	13266.4	14111.1	7446.97	2528.74	4220.85	6696.97	1078.66	3490.48	14000.4	12740.8
316	tr|B7Z8A2|B7Z8A2_HUMAN	cDNA FLJ51671, highly similar to Prenylcysteine oxidase OS=Homo sapiens OX=9606 PE=2 SV=1	2780.73	2246.38	5333.33	5133.65	4083.11	5488.64	4350.95	5151.6	8254.67	7383.33	840.789	2569.51	5674.85	4576.2	5198.42	2123.64	2802.76	2785.16	3775.46	4198.71	6978.93	9406.25	1736.9	2647.84	3393.38	6876.69	7501.17	7573	6066.3	5041.21	8221.11	8232.41	5675.46	2796.01	3805.29	1061.5	4912.11	3483.08	3257.58	4254.27	1317.1	1286.54	1339.25	3263.79	2601.03	2141.68	5562.34
317	tr|A0A7T0PWU2|A0A7T0PWU2_HUMAN	Immunglobulin heavy chain variable region (Fragment) OS=Homo sapiens OX=9606 PE=2 SV=1	7330.97	2575.79	2952.47	3242.48	786.36	5174.03	10927.1	2030.25	4174.81	1598.19	2451.99	1534.27	6619.35	9300.2	2103.33	814.278	455.514	1846.11	7101.8	4149.32	5301.31	6586.93	4164.92	2976.33	4136.09	2027.92	3586.55	6795.17	4695.81	4633.5	5111.41	6558.87	6442.18	783.547	6744.36	6259.63	3245.56	1895.66	13129.6	12144.7	821.601	1434.32	2698.09	97.8844	300.756	4751.02	3926.37
318	tr|A0A5C2GR38|A0A5C2GR38_HUMAN	IG c1184_heavy_IGHV3-66_IGHD3-22_IGHJ3 (Fragment) OS=Homo sapiens OX=9606 PE=2 SV=1	3583.68	3428.13	364.641	931.692	857.894	821.765	1415.94	1113.61	1135.75	1150.47	873.095	895.638	624.595	240.479	381.653	1099.51	126.525	534.376	880.072	907.789	461.368	1044.62	970.547	1484.36	3087.43	2476.33	759.139	1898.99	856.081	596.426	1518.84	171.507	3700.31	3775.71	437.314	86.5425	3585.37	1786.74	3565.45	3644.46	756.002	642.982	327.622	275.244	379.931	349.311	791.679
319	tr|A0A5C2FXA4|A0A5C2FXA4_HUMAN	IGL c1611_light_IGKV3-11_IGKJ5 (Fragment) OS=Homo sapiens OX=9606 PE=2 SV=1	31644	28689	14027.7	14845.1	28336.5	29455.6	63417.4	67048.8	37872.2	36288.2	26954.9	25081.2	23577.3	20619.9	20233.2	17336.4	10538.7	11218.5	63801.2	64700	32905	34293.8	25122.4	28844.3	32720.1	33444.4	49043.4	49803.7	16590.3	14646.1	38209.3	37391.6	37960.9	36660.5	9541.61	7125.71	61906.7	50840	22699.1	24799.3	10683.9	9079.49	9124.12	8579.98	9354.1	62370.6	58529.1
320	tr|A0A5C2GMH1|A0A5C2GMH1_HUMAN	IG c43_heavy_IGHV3-64_IGHD2-21_IGHJ4 (Fragment) OS=Homo sapiens OX=9606 PE=2 SV=1	2527.87	2271.27	1507.75	1575.26	3052.68	2400.48	5093.14	3068.55	3349.91	3910.88	3888	2275.3	4192.66	6983.88	1414.36	1165.2	1169.87	804.296	6288.83	2339.94	3797.04	6585.29	1525.56	2214.59	3279.6	1153.91	893.963	961.604	1608.81	2802.84	1676.72	1310.22	206.357	1732.41	143.313	1455.87	3874.28	2786.94	1222.67	3343.27	990.406	481.84	1366.79	1203	470.912	594.879	540.568
321	tr|A0A7S5BYY5|A0A7S5BYY5_HUMAN	IGH c245_heavy_IGHV3-74_IGHD3-22_IGHJ4 (Fragment) OS=Homo sapiens OX=9606 PE=2 SV=1	571.448	324.789	257.469	265.083	1171.52	1179.72	361.303	632.394	1332.68	1374.53	440.258	1537.4	875.158	251.134	2214.23	1390.92	301.863	217.843	376.412	839.836	570.839	1836.28	456.806	311.131	512.343	692.895	166.223	1355.49	528.979	241.733	463.846	1148.3	2504.48	2648.58	1042.31	398.936	1164.15	316.568	180.699	757.499	588.827	291.016	254	555.001	374.711	883.198	1275.35
322	tr|A0A5C2GRI5|A0A5C2GRI5_HUMAN	IG c1503_heavy_IGHV4-39_IGHD3-22_IGHJ3 (Fragment) OS=Homo sapiens OX=9606 PE=2 SV=1	6782.98	6232.29	5467.38	7731.79	9564.68	12807.9	20152.7	17464.7	13680.8	9084.63	8674.43	10226.8	7908.93	7946.64	6175.38	6498.57	6214.92	6680.75	7779.82	5457.37	9247.33	7447.08	14674.9	9676.45	9763.23	13406.1	18909.9	8403.05	2173.74	3640.21	6009.81	5593.32	14999.5	17778.7	6142.42	4416.05	14703.4	9162.27	9386.05	8102.5	2884.13	2436.77	2980.5	4844.58	3388.23	45929.1	49513.5
323	tr|A0A5C2GIG8|A0A5C2GIG8_HUMAN	IG c833_heavy_IGHV1-18_IGHD3-16_IGHJ4 (Fragment) OS=Homo sapiens OX=9606 PE=2 SV=1	506.652	555.634	875.763	372.305	814.758	257.166	1771.19	345.675	382.858	1285.26	848.994	460.766	221.726	460.413	266.666	291.096	137.765	312.875	1063.83	528.785	1115.29	485.358	446.786	363.729	418.533	282.77	175.243	1248.58	196.164	339.135	1463.36	1269.91	497.784	409.66	63.4878	1315.82	190.164	1565.29	349.186	633.443	156.552	704.106	424.236	132.376	1051.94	3306.37	1675.43
324	tr|D6RAR4|D6RAR4_HUMAN	Hepatocyte growth factor activator OS=Homo sapiens OX=9606 GN=HGFAC PE=1 SV=1	7118.36	10035.7	6837.35	11358.6	5189.22	1787.51	5088.65	4669.06	6224.06	5475.74	2566.63	4762.55	3623.79	2208.3	3246.91	5933.76	1766.17	2984.82	12258.5	10809.9	6236.13	1728.66	4125.6	3977.8	5705.26	2636.39	5248.24	4708.68	9260.05	7909.95	7825.25	8871.25	9301.71	1409.54	2763.48	5480.97	2135.81	2061.56	4014.17	7081.76	1842.8	4883.05	2584.27	773.77	3221.39	5525.4	5585.53
325	tr|A0A5C2GKN5|A0A5C2GKN5_HUMAN	IG c369_heavy_IGHV3-74_IGHD1-26_IGHJ4 (Fragment) OS=Homo sapiens OX=9606 PE=2 SV=1	19624	17440.7	15173.6	20164.1	14404.9	19920.3	63922.6	62290.8	38126.9	40940	25758.1	21859.1	21917.8	18552.6	21383.6	15622	7970.09	6255.54	18146.2	16105	29860.8	27577	17541.8	21083	22749.4	22352.7	18290.8	21966.5	23588.3	22481.6	93484.3	88803.5	51103.3	28147.3	36057.4	31568.6	35894	29532.4	29152.2	35573.7	6746.45	6472.75	9317.83	9290.5	7783.49	29074.1	27529.7
326	tr|A0A7S5BYS6|A0A7S5BYS6_HUMAN	IGH c384_heavy_IGHV1-69_IGHD4-23_IGHJ6 (Fragment) OS=Homo sapiens OX=9606 PE=2 SV=1	619.485	600.574	1379.14	451.661	811.796	1180.36	1334.77	2555.74	538.693	667.208	426.839	1193.12	709.39	245.95	7352.7	8357.13	5764.25	857.532	9956.78	1881.22	902.997	760.618	1779.02	980.49	1198.18	839.476	767.414	229.423	1311.6	1222.59	1527.21	2970.45	1925.27	1220.95	1253.82	339.097	6306.98	2970.66	960.924	94.2864	168.358	180.378	188.428	426.918	333.258	226.292	222.224
327	tr|A0A5C2GXA0|A0A5C2GXA0_HUMAN	IG c1059_light_IGLV2-23_IGLJ3 (Fragment) OS=Homo sapiens OX=9606 PE=2 SV=1	15159.8	14265.4	13485.3	14613.3	16605.2	19922.4	28422.3	27731.4	20771	21136.7	34365.5	32575.4	23697.4	23050.2	14202.3	13354.9	15915.2	14914.4	48313.2	42805.3	24507.4	25180.7	29187.2	30368.9	36225.2	37866.1	66859.4	69838.7	49553.6	46100.6	33484.4	33187.9	36588.4	34524.8	23060.3	22406.9	55995.9	49369.5	21794.5	23480.1	25726.1	21805.3	26118	27312.7	26622	102334	92335.5
328	tr|A0A7S5C4H9|A0A7S5C4H9_HUMAN	IGH c3215_heavy_IGHV3-15_IGHD5-18_IGHJ3 (Fragment) OS=Homo sapiens OX=9606 PE=2 SV=1	1814.68	1537.38	1546.11	1462.12	6261.5	8957.38	2063.47	4247.47	2341.94	1201.2	3950.59	2539.62	6020.61	4416.18	410.91	1024.36	1892.04	1186.03	4320.6	3897.54	2563.54	4729.17	3167.92	2017.47	1278.99	568.657	3043.56	2319.6	2845.29	2564.06	2811.85	3635.02	3955.96	3693.79	1004.14	702.808	3488.57	1095.19	3231.22	2006.96	529.157	1069.43	393.312	260.176	953.266	6128.41	5225.91
329	tr|A0A5C2H0J1|A0A5C2H0J1_HUMAN	IG c1458_light_IGKV2-30_IGKJ1 (Fragment) OS=Homo sapiens OX=9606 PE=2 SV=1	5046.56	4688.38	3536.03	2405.17	7767.8	7863.91	14603.3	11967.5	6166.89	3026.09	6830.64	4051.1	9199.41	7789.25	2454.64	3326.95	1518.44	6043.28	1285.71	9218.7	6138.18	3606.18	7558.59	9104.92	5032.54	10997.3	6421.13	9659.56	3756.96	4507.54	19108.7	18048.6	10191.4	12385	3693.42	8908.51	13699.1	10019.7	8671.3	8888.75	1431.47	914.384	656.698	4332.11	977.983	6809.66	1650.84
330	tr|A0A5C2GGH7|A0A5C2GGH7_HUMAN	IG c408_heavy_IGHV3-33_IGHD3-22_IGHJ6 (Fragment) OS=Homo sapiens OX=9606 PE=2 SV=1	1246.94	1513.46	1319.66	168.575	1708.11	477.511	4209.85	6491.93	824.069	2114.58	486.535	1540.09	1587.71	1065.96	971.07	408.492	678.043	420.496	1516.86	2243.19	9948.93	11205.1	277.755	401.129	1906.01	4554.8	1454.49	1760.01	743.358	357.844	4814.43	4731.28	3407.52	4487.13	2121.4	2675.71	2109.29	1201.61	8068.47	6252.98	818.947	866.707	784.627	605.702	562.024	1309.71	5755.39
331	tr|A0A5C2GK52|A0A5C2GK52_HUMAN	IG c101_heavy_IGHV4-34_IGHD3-3_IGHJ6 (Fragment) OS=Homo sapiens OX=9606 PE=2 SV=1	5883.84	6213.62	737.451	2365.74	4168.6	3201.27	5819.71	13381.3	5331.49	1288.82	3360.49	3161.68	2172.01	3129.82	1419.86	2219.89	3562.51	1938.8	5128.97	4012.04	8563.25	6731.04	13811.8	12784.8	7456.66	9235.63	4271.48	3998.08	3680.25	2401.26	4167.82	5103.74	8759.16	9200.24	7604.28	7532.5	6055.99	5624.8	4488.18	5836.31	1871.65	2895.41	1695.58	3062.55	2010.89	6131.69	6049.27
332	tr|A0A5C2GNK8|A0A5C2GNK8_HUMAN	IG c120_heavy_IGHV1-8_IGHD1-7_IGHJ6 (Fragment) OS=Homo sapiens OX=9606 PE=2 SV=1	1421.96	625.33	3500.84	646.588	4815.05	3670.91	2967.55	3421.36	7973.49	840.485	832.695	984.726	3696.97	4171.4	2115.49	508.218	1946.25	1725.84	3493.43	1319.79	307.293	1110.5	6984.62	8462.73	6541.07	1812.13	3070.59	1595.94	794.69	747.135	5287.34	2634.48	795.151	292.6	3264.85	2136.04	722.418	4916.07	1440.89	4056.14	391.055	435.33	203.889	2016.81	346.713	592.879	4514.96
333	tr|A0A5C2GVT0|A0A5C2GVT0_HUMAN	IG c1601_heavy_IGHV3-74_IGHD1-7_IGHJ2 (Fragment) OS=Homo sapiens OX=9606 PE=2 SV=1	776.574	460.384	1947.12	1170.8	1988.45	1818.47	1365.24	164.785	901.897	1161.96	714.572	3540.34	185.807	661.562	3069.3	2579.92	1121	417.37	739.181	643.158	1180.06	561.273	108.614	1822.4	161.397	1338.34	726.969	406.967	1291.53	1251.93	3917.5	6645.16	3304.08	2700.4	2262.46	887.249	4309.42	1690.3	3313.01	2479.68	421.925	210.061	636.902	787.849	530.801	2116.98	2371.87
334	tr|A0A7S5C371|A0A7S5C371_HUMAN	IGH c2254_heavy_IGHV3-15_IGHD5-12_IGHJ5 (Fragment) OS=Homo sapiens OX=9606 PE=2 SV=1	4287.57	1156.45	19308.5	22165.4	1098.58	4463.37	2346.18	3852.03	3809.37	9049.17	3422.46	3280.24	1839.57	5236.09	17862	3862.91	5589.93	5453.58	822.738	22894.5	2102.24	518.814	2346.46	1902.85	9030.79	19615.6	3621.34	1346.76	1273.67	461.514	1946.95	4477.56	4159.78	3913.45	1024.03	950.845	5259.58	3873.23	3048.67	287.189	1647.48	132.889	1094.05	937.928	3530.09	5137.21	862.457
335	tr|A0A5C2GVE2|A0A5C2GVE2_HUMAN	IG c1534_light_IGKV3-20_IGKJ2 (Fragment) OS=Homo sapiens OX=9606 PE=2 SV=1	6076.04	6502.24	3678.84	9335.43	13513	13720.6	20744.5	21410.4	20025.6	18586.9	12621.5	8208.06	6020.17	8017.68	6188.03	6175.35	5688.77	5903.24	12454.9	10246.4	13730.4	15588	6455.22	7687.69	13762.1	14680.4	7948.17	11628.1	8185.26	8910.79	11858.3	12814.5	22416.5	20279.4	6598.61	4248.12	19230.4	17729	10666.4	11649.5	5435.01	5478.88	5842.54	5334.03	4597	24151.9	18691.4
336	tr|B4DUV1|B4DUV1_HUMAN	Fibulin-1 OS=Homo sapiens OX=9606 PE=2 SV=1	5035.49	3613.38	5903.46	6727.8	2587.24	4311.94	4525.9	9267.62	5940.23	7448.89	2057.65	4413.9	6073.28	3303.79	3055.58	3149.8	2369.34	3319.86	7358.3	7603.64	7837.8	6231.93	2863.2	3383.39	8140.85	2874.23	6895.41	4673.81	5512.61	7549.9	7210.95	13116.6	6594.02	5817.93	10960.3	10206.1	14424.7	7052.53	5985.35	4274.89	2584.96	1745.61	2694.66	2510.81	3312.72	4449.77	5518.86
337	tr|A0A7S5ETW7|A0A7S5ETW7_HUMAN	IGH c90_heavy_IGHV3-48_IGHD1-14_IGHJ4 (Fragment) OS=Homo sapiens OX=9606 PE=2 SV=1	3940.66	3428.57	111.978	1195.78	1463.04	516.986	3278.4	5160.24	3553.2	3412.84	3226.81	2187.49	2098.49	3712.36	1278.78	378.678	558.775	397.259	2590.13	1923.54	3173.52	1567.66	2736.45	2601.05	3032.69	2452.83	5333.03	2225.74	2388.94	1835.63	2808.03	2575.16	6432.02	6016.71	2852.95	3173.78	3912.59	1269.21	4822.23	5037.41	455.628	461.424	226.136	207.992	359.841	1311.04	701.666
338	tr|A0A5C2G2V5|A0A5C2G2V5_HUMAN	IGL c3244_light_IGKV2D-40_IGKJ2 (Fragment) OS=Homo sapiens OX=9606 PE=2 SV=1	7657.71	701.103	4070.82	3431.96	11020.1	4903.04	9805.69	5459.65	6158.09	3361.68	1968.1	2401.25	7437.16	6502.72	2931.16	1938.62	959.463	2606.57	2131.67	5853	3499.73	3063.46	6882	7695.8	7159.22	5421.81	2192.09	5365.14	1435.52	4095.18	9972.95	11396.1	7052.31	5270.73	6175.32	3361.19	6713	6774.76	4244.84	3731.11	2118.24	683.872	3852.89	1493.17	2142.98	5745.7	3415.39
339	tr|A0A5C2FWE4|A0A5C2FWE4_HUMAN	IGL c148_light_IGKV3-15_IGKJ2 (Fragment) OS=Homo sapiens OX=9606 PE=2 SV=1	234.784	726.597	321.143	1067.47	628.714	2798.79	3339.5	3404.54	3127.65	2619.82	2034.7	194.046	1261.38	393.199	682.567	527.962	581.034	978.342	1535.61	1083.86	933.409	1722.52	1484.18	936.232	436.59	913.652	1051.77	565.398	896.189	827.48	2806.33	84.7807	1994.67	1056.83	1245.87	198.858	401.801	2647.09	869.922	527.144	634.069	322.784	608.823	408.268	148.421	449.686	871.753
340	tr|A0A7S5C4Q9|A0A7S5C4Q9_HUMAN	IGH c3832_heavy_IGHV4-59B_IGHD3-22_IGHJ4 (Fragment) OS=Homo sapiens OX=9606 PE=2 SV=1	616.883	243.127	1671.18	246.69	1625.79	1545.37	3440.23	4617.3	390.694	1638.99	1356.7	1368.1	1324.87	387.227	375.694	265.563	460.158	262.815	1899.28	1220.48	933.759	356.874	405.355	385.943	178.679	948.706	1089.84	285.349	1750.61	286.678	131.567	217.056	98.0957	201.213	151.973	433.616	1362.09	1046.78	160.349	298.278	396.055	709.373	902.784	315.167	857.522	1330.19	1253.33
341	tr|B2R4M6|B2R4M6_HUMAN	Protein S100 OS=Homo sapiens OX=9606 PE=2 SV=1	3592.85	5964.77	3733.31	2722.7	4322.3	3691.3	1191.37	1306.03	3481.2	1079.11	4870.01	4577.4	6017.61	3697.22	3679.42	718.908	2484.71	2151.94	2890.93	870.889	4354.99	634.45	2492.43	1974.48	3121.89	1088.34	2185.57	1122.71	2932.94	1538.57	4711.54	4637.6	5255.42	1493.04	1880.66	374.666	2539.77	310.059	3770.72	4604.68	14285.5	14684.4	13610.7	17345.2	15927.2	18967.1	14517.1
342	tr|A0A5C2G6Z1|A0A5C2G6Z1_HUMAN	IGL c3467_light_IGKV3-15_IGKJ2 (Fragment) OS=Homo sapiens OX=9606 PE=2 SV=1	14993.1	17399.9	18116.9	19889.3	46982.3	50328.2	62301.7	61997.3	28431.8	37712.1	15809.5	16827.4	20233.8	22692.9	8083.71	15457.1	9758.16	6520.39	23355.6	21415.6	24171.5	25515.5	36157.6	31134.5	26158.8	28918.1	17956.7	19207.2	12432.7	7383.41	20830	26492.2	31428.9	31548.9	22500.7	18077.5	49728.8	46684.4	19401.2	23173.7	6848.88	6938.73	8004.81	6984.46	72571.2	35066.2	37620.5
343	tr|B7Z1F8|B7Z1F8_HUMAN	cDNA FLJ53025, highly similar to Complement C4-B OS=Homo sapiens OX=9606 PE=2 SV=1	1646.74	2693.56	728.283	2054.89	281.398	676.576	2084.08	783.041	1312.01	961.326	716.512	1229.49	1284.11	746.213	2137.75	1156.28	1195.34	392.46	533.219	2040.73	1093.41	771.616	19021.8	16994.4	2460.44	503.525	1385.37	2096.74	1611.53	2682.28	830.718	1737.08	1293.66	371.068	22584.5	20070.4	1474.03	770.55	24200.6	25344.9	1094.69	454.351	786.788	510.123	962.354	970.69	1099.63
344	tr|A0A5C2G118|A0A5C2G118_HUMAN	IGL c2822_light_IGLV3-21_IGLJ2 (Fragment) OS=Homo sapiens OX=9606 PE=2 SV=1	1627.81	849.732	37449	39058.6	2125.14	2832.39	11046.6	10312.5	2993.61	1826.49	1047.82	1355.48	735.366	1220.76	930.043	663.841	868.549	585.83	3542.65	2661.62	3054.97	2890.75	1137.12	1705.84	2531.93	3382.19	3695.82	4174.63	905.298	926.299	5714.24	2495.09	5198.88	4479.01	668.105	1159.47	3556.43	3959.59	7591.33	8181.87	591.762	357.674	291.307	449.554	387.926	1976.16	2137.23
345	tr|A0A5C2FXT8|A0A5C2FXT8_HUMAN	IGL c1454_light_IGKV1D-39_IGKJ1 (Fragment) OS=Homo sapiens OX=9606 PE=2 SV=1	2967.15	1972.83	441.144	297.509	4664.16	6366.21	2912.1	3040.09	1325.8	1383.62	383.513	1530.74	3843.66	5514.65	860.243	470.342	762.627	1354.07	2398.6	320.99	1116.9	1542.76	233.032	338.204	1468.05	2698.43	771.826	871.728	797.142	826.434	1820.12	2164.3	2136.27	174.006	2630.98	1289.34	166.61	1862.9	1212.59	2814.59	250.046	531.526	223.985	282.419	70.4931	758.822	248.682
346	tr|A0A5C2FTG3|A0A5C2FTG3_HUMAN	IGL c248_light_IGKV1D-33_IGKJ3 (Fragment) OS=Homo sapiens OX=9606 PE=2 SV=1	1591.35	1600.78	3201.37	2658.73	3364.13	2899.33	661.15	843.304	829.889	3843.43	1430.19	2128.32	3053.5	1109.84	414.481	1329.19	469.309	279.637	849.697	1674.62	222.268	2012.19	781.474	3638	1864.7	2154.29	2722.19	2688.09	1697.85	673.155	724.252	2146.81	1501	1807.78	1202.6	2208.02	168.424	2031.52	1740.07	890.176	516.61	585.518	343.162	1076.6	703.809	271.411	1906.54
347	tr|A0A5C2FYZ3|A0A5C2FYZ3_HUMAN	IGL c875_light_IGKV3-20_IGKJ1 (Fragment) OS=Homo sapiens OX=9606 PE=2 SV=1	3661.23	2886.73	1621.84	2056.34	6794.48	4213.13	7089.47	4952.42	4150.82	6452.81	3612.54	8414.17	1075.84	4053.68	7119.24	1882.3	1089.31	973.523	10743.8	9672.76	1881.92	3298.59	4626.54	7194.38	3692.55	4090.05	3156.87	4734.48	1682.16	11680.8	3407.16	4401.62	4230.66	2767.55	1955.06	2137.25	25454.2	5488.43	4043.81	3596.11	6755.32	1225.44	851.508	1458.1	1908.44	10170.1	10534.8
348	tr|Q6MZU6|Q6MZU6_HUMAN	Uncharacterized protein DKFZp686C15213 OS=Homo sapiens OX=9606 GN=DKFZp686C15213 PE=2 SV=1	5785.09	3877.29	30468.9	27315.4	13823.6	15502.1	33367.5	49925.5	6105.82	9494.01	9213.62	21213.7	29058.1	15001.6	13888.2	11949.5	6825.04	8091.09	3450.44	12175.5	33570.9	41176.5	28126.4	25619.2	11682.4	17416.5	13554.4	5461.7	4475.61	8674.05	37901.6	49067.5	35549.9	32835	25563.3	24867.5	6758.75	3551.91	25144.9	32322.1	3425.77	1132.29	6971.34	2320.75	2913.75	2697.74	4979.58
349	tr|A0A5C2GSW3|A0A5C2GSW3_HUMAN	IG c102_light_IGLV1-44_IGLJ3 (Fragment) OS=Homo sapiens OX=9606 PE=2 SV=1	25203.6	26883.1	3276.17	3711.54	7120.15	3435.66	4943.73	7716.56	10567.7	10269.5	5511.3	3745.24	5241.66	3615.97	1476.15	2861.84	3207.41	1920.45	8112.81	6668.55	6172.3	11974.2	5374.2	3233.65	6219.63	3912.44	6133.79	7410.91	6863.04	8064.35	6733.89	5206.45	7368.42	5973.08	3128.6	5210.74	10055.6	7794.19	4537.17	3523.61	1913.65	3159.97	3082.58	5787.24	4594.27	17333.7	15954.5
350	tr|A0A5C2G1N1|A0A5C2G1N1_HUMAN	IGL c2366_light_IGKV3-20_IGKJ1 (Fragment) OS=Homo sapiens OX=9606 PE=2 SV=1	6407.28	3478.09	1893.58	670.411	7696.89	7646.17	4138.76	13431.2	4092.94	2118.73	725.544	1333.02	144.139	3174.85	393.567	3100.84	1181.49	347.31	2270.72	2739.42	2578.18	2005.22	2993.66	883.706	2370.33	2844	3426.48	7320.29	716.948	484.008	6750.92	7038.65	657.759	1097.39	807.79	970.152	1420.93	1757.94	2952.65	1011.36	2288.17	436.98	302.982	2923.01	1094.24	416.825	2929.5
351	tr|A0A5C2GDM3|A0A5C2GDM3_HUMAN	IGH + IGL c594_light_IGKV2-28_IGKJ2 (Fragment) OS=Homo sapiens OX=9606 PE=2 SV=1	812.713	1767.64	4752.79	3649	5698.84	6439.66	7285.74	9291.63	4360.31	5534.83	2273.14	3350.93	5627.56	2094.2	3690.74	4837.46	1037.46	1887.28	2876.67	2734.49	1527.31	3673.77	4327.98	4823.33	8326.5	6843.98	11870.6	10674.7	631.718	2164.51	4968.39	6892.78	9456.6	9685.1	652.59	3023.61	7934.47	9498.01	10210.7	10834.6	1687.07	1079.7	1383.47	783.38	801.502	3988.56	3999.04
352	tr|A0A5C2G922|A0A5C2G922_HUMAN	IGH c434_heavy__IGHV3-49_IGHD2-21_IGHJ4 (Fragment) OS=Homo sapiens OX=9606 PE=2 SV=1	412.284	530.251	132.203	387.617	250.925	3946.43	5527.78	4811.26	1763.97	1777.01	2234.26	589.095	276.87	471.803	528.576	2351.1	742.4	533.772	2824.26	2832.53	1694.13	1798.76	3111.37	2580.86	533.471	2427.83	1339.09	826.03	159.957	504.099	2650.23	1860.92	1542.79	2962.31	1591.81	500.292	2209.17	4433.3	2275.87	2951.48	5239.03	5445.11	3069.69	5132.43	4923.93	6982.28	8024.21
353	tr|A0A5C2FUE5|A0A5C2FUE5_HUMAN	IGL c601_light_IGLV2-14_IGLJ3 (Fragment) OS=Homo sapiens OX=9606 PE=2 SV=1	3926.13	2694.83	1938.43	1975.55	3612.61	3709.41	3486.43	3523.43	3901.25	2776.04	2810.85	399.397	2673.25	3087.44	1621.96	1880.53	2294.9	2747.36	7192.69	6471.03	3110.71	4156.73	3974.9	4346.06	3638.62	641.846	2606.15	3788.41	4006.71	2529.77	5290.21	6363.63	10156.6	8820.03	1913.04	1463.67	6489.24	5779.96	2817.92	3168.27	4747.03	1975.4	1083.86	1299.19	1290.2	4433.41	4743.44
354	tr|B7Z507|B7Z507_HUMAN	92 kDa gelatinase OS=Homo sapiens OX=9606 PE=2 SV=1	1326.09	2464.16	483.944	3157.83	2164.91	1066.35	2099.58	1379.55	798.029	2268.3	643.512	2830.81	5613.51	2527.54	3546.17	3653.84	2076.92	2982.69	2379.07	2264.28	2289.47	630.278	605.642	3194.17	3241.93	4295.75	2948.26	2576.81	2750.85	1443	516.407	1239.62	825.342	1688.15	2089.26	3206.7	2915.63	983.1	3563.54	1494.36	2431.21	3593.61	2214.43	3921.45	3230.79	3438.81	2758.79
355	tr|A0A5C2G9X9|A0A5C2G9X9_HUMAN	IGH + IGL c18_light_IGKV2-30_IGKJ1 (Fragment) OS=Homo sapiens OX=9606 PE=2 SV=1	6214.3	4853.52	3882.14	7343.67	8254.77	20845.8	22182	18921.4	2879.66	3012.28	16601.2	17811.2	5611.39	6399.24	4470.53	5983.77	5046.08	3126.02	4252.2	4610.1	4891.98	1867.5	6572.7	10234.7	5969.51	8394.02	5198.89	5461.82	8973.55	7218.44	12659.3	7476.92	9005.09	11900.2	4179.55	1002.68	39005.9	34284.9	13816.6	18798.2	9550.66	8177.79	10359.2	5007.81	10039.8	23188.5	17560.9
356	tr|Q6FHW3|Q6FHW3_HUMAN	Adipsin OS=Homo sapiens OX=9606 GN=DF PE=2 SV=1	5298.2	5588.75	5616.36	6041.16	13129.3	12978.5	10629.1	10118.2	2737.24	4450.69	7470.94	9638.04	5916.93	5903.25	3790.46	3321.2	4720	5622.81	6576.45	5231.48	8086.25	6183.61	4741.63	4507	2475.54	2616.34	5546.1	4845.63	5051.42	5566.39	6280.22	6779.21	6169.69	5484.93	18865.8	16757.6	8637.66	10493	4511.62	6992.07	1738.49	1842.53	2359.82	2486.85	1191.82	3242.52	5508.07
357	tr|A0A5C2GF44|A0A5C2GF44_HUMAN	IG c1250_heavy_IGHV3-15_IGHD1-26_IGHJ2 (Fragment) OS=Homo sapiens OX=9606 PE=2 SV=1	11366	11673	7868.65	8692.17	11704.3	13107.5	19749.6	18798.2	9105.83	11908	14489.9	18157.7	9260.04	970.678	3728.51	3409.97	3912.85	5185.94	9076.36	10872.6	9714.79	8512.34	10995.9	227.094	11074.9	10903.3	10585	9641.98	7507.7	6517.49	16748.4	19511.6	10573.7	11058.3	9925.72	8476.49	16691.2	15212.5	13003.5	15531.3	17053.1	16217.4	14688	13048.6	16262.2	29876.8	34366.8
358	tr|A0A5C2GI16|A0A5C2GI16_HUMAN	IGH + IGL c395_heavy_IGHV3-15_IGHD4-17_IGHJ4 (Fragment) OS=Homo sapiens OX=9606 PE=2 SV=1	301.897	835.299	1462.46	295.341	4122.65	1787.74	21872.9	19740.8	463.767	1813.19	1913.77	1831.68	2376.39	450.864	1444.9	773.126	333.596	1128.33	607.128	1044.47	131.657	950.157	1131.45	1936.33	446.31	573.415	1479.44	1430.34	249.539	568.307	878.734	1297.17	1252.06	174.764	399.751	1185.37	1547.79	793.31	500.973	804.108	643.036	1044.7	770.467	376.399	2716.3	679.205	548.348
359	sp|Q6EMK4|VASN_HUMAN	Vasorin OS=Homo sapiens OX=9606 GN=VASN PE=1 SV=1	2272.35	2418.04	2454.13	1950.62	2506.2	4700.94	1619.29	745.837	1098.98	1594.62	2684.43	1498.45	2981.56	2451.51	1084.63	2158.98	3566.12	604.035	2251.58	2486.19	3611.35	2921.52	912.07	3326.88	790.672	1049.81	3331.41	2005.75	532.106	1048.36	1304.61	3683.91	1413.9	2070.69	3912.88	2910.11	3642.01	1335.07	3217.43	355.939	1258.41	957.249	1687.24	1557.05	2716.06	2309.22	1193.69
360	tr|A0A5C2GW70|A0A5C2GW70_HUMAN	IG c689_light_IGKV3-20_IGKJ1 (Fragment) OS=Homo sapiens OX=9606 PE=2 SV=1	7390.31	21929	30420.5	3092	6136.73	6485.4	15281.6	16300.5	6831.09	9366.23	5377.42	4946.46	52561.6	5879.72	2807.46	2043.42	875.23	952.672	8259.43	7077.11	33606.4	29775.9	105.323	4560.19	4719.23	42198.7	42786.8	6955.97	275.925	3321.62	52588.6	1638.81	9676.11	11484.6	5646.98	3935.74	45590	9166.47	5357.18	63950.4	1349.2	3508.12	1761.89	573.797	3098.8	2160.29	3154.86
361	tr|A0A5C2FW64|A0A5C2FW64_HUMAN	IGL c1328_light_IGLV2-23_IGLJ1 (Fragment) OS=Homo sapiens OX=9606 PE=2 SV=1	711.856	400.663	3260.94	3040.5	1003.78	723.384	3495.5	390.432	3851.76	2461.98	208.691	677.739	3485.72	2936.09	492.5	467.644	1632.09	538.937	2349.84	3619.96	3874.61	3224.95	2840.49	2649.34	3578.31	2820.26	1254.75	2398.56	1722.67	1716.21	4912.36	4876.64	5638.28	5420.55	2728.34	2669.78	5597.18	5030.08	7608.06	6520.83	739.573	1080.24	706.915	375.801	92.3896	3939.97	3626.64
362	tr|A0A5C2GRM8|A0A5C2GRM8_HUMAN	IG c1364_heavy_IGHV3-66_IGHD3-3_IGHJ4 (Fragment) OS=Homo sapiens OX=9606 PE=2 SV=1	265.292	865.686	762.79	950.868	2549.88	2402.69	3616.85	4566.6	1014.54	1938.46	2216.17	2117.92	1881.64	2021.51	792.551	1455.2	288.248	177.852	1119.09	462.699	2900.47	3068.26	2159.16	1406.54	1363.15	806.225	3667.1	4693.61	1962.99	2421.77	1291.96	1231.81	4002.18	3598.64	181.534	1804.47	2044.12	1687.98	1778.97	1581.66	627.486	631.393	1044.93	870.848	1019.75	2453.1	2922.65
363	tr|A0A7S5BZQ4|A0A7S5BZQ4_HUMAN	IGH c1296_heavy_IGHV3-7_IGHD7-27_IGHJ4 (Fragment) OS=Homo sapiens OX=9606 PE=2 SV=1	738.434	544.717	760.615	615.116	844.559	213.523	143.992	472.45	352.695	159.119	596.596	264.696	781.778	377.16	1323.24	499.923	121.649	221.559	502.21	545.722	913.746	332.494	1215.08	1548.75	1007.01	1013.19	383.231	135.149	454.319	324.964	731.575	305.684	550.796	978.116	74.2606	165.374	293.009	172.207	128.461	247.051	295.13	534.124	119.952	469.92	732.797	14978.4	13243.1
364	tr|A0A5C2GPZ0|A0A5C2GPZ0_HUMAN	IG c650_heavy_IGHV3-23_IGHD4-11_IGHJ4 (Fragment) OS=Homo sapiens OX=9606 PE=2 SV=1	6458.08	7500.13	5847.92	9275.15	5150.47	10866.3	23594.4	23003.2	9749.12	9518.5	6642.8	5089.27	2457.82	9473.11	6969.06	6511.18	8062.21	7537.67	8850.42	10613.5	22921	7314.92	5981.46	6232.47	33837.1	33901.2	13013.6	10313	9528.1	10545	7613.95	7048.53	8057.1	8279.62	12392.2	11101.1	5628.51	35311	24735.5	7709.46	1894.81	1868.58	8688.57	8446.72	10774.6	9381.58	60357.7
365	tr|A0A5C2GDU6|A0A5C2GDU6_HUMAN	IG c1122_heavy_IGHV3-13_IGHD2-15_IGHJ6 (Fragment) OS=Homo sapiens OX=9606 PE=2 SV=1	4906.16	3191.43	442.916	2768.62	7227.63	9830.65	4522.24	3222.13	6836.86	2215.56	3774.46	4942.15	5351.94	5491.91	2787.61	1616.94	3090.07	2887.97	1235.09	2605.55	2710.98	669.813	3239.58	2613.82	6324.9	6111.73	3781.1	7217.89	6598.88	5810.95	6278.03	7247.26	4053.06	3150.64	2880.33	1749.63	671.005	3530.38	805.798	3469.34	1239.32	1812.19	1318.96	1522.25	708.859	503.453	1332.47
366	tr|A0N7I9|A0N7I9_HUMAN	F5-20 (Fragment) OS=Homo sapiens OX=9606 GN=F5-20 PE=2 SV=1	9340.06	8063.94	2188.78	922.821	349.314	1002.95	7691.48	4667.14	5542.67	9736.71	12316.2	11926.2	1550.98	941.165	3123.23	3692.44	564.167	242.033	2256.13	2386.46	130.734	776.245	12115.3	53.9277	1741.4	997.578	2104.89	1889.51	976.184	2065.49	0	2115.08	2520.53	949.103	746.889	904.816	2669.87	4508.93	4823.95	68.2061	0	224.288	494.634	0	0	819.343	1326.13
367	tr|A0A5C2GUL4|A0A5C2GUL4_HUMAN	IG c1215_light_IGKV3-15_IGKJ2 (Fragment) OS=Homo sapiens OX=9606 PE=2 SV=1	356.36	1564.99	4050.23	3492.15	1771.78	2760.06	8177.59	7319.5	4349.28	4300.43	3598.37	4377.87	194.639	2332.95	1929.79	3033.34	878.321	923.249	3260.76	6388.55	4055.34	4176.35	1395.38	2274.2	1750.12	3096.8	3820.86	5088.57	8748.73	1040.81	2926.12	2311.09	8650.83	8406.6	2280.81	2039.78	3030.33	3189.02	2911.02	451.154	1257.33	2536.08	177.898	2560.14	2525.33	26434.3	21083
368	sp|Q86UD1|OAF_HUMAN	Out at first protein homolog OS=Homo sapiens OX=9606 GN=OAF PE=2 SV=1	1442.8	134.518	4637.73	3184.21	3651.45	2747.23	1224.92	2531.25	2726.73	1374.87	5059.77	6990.46	3484.39	2860.34	3754.95	1220.56	3328.07	1802.4	3367.62	5287.03	2113.84	2314.39	1187.43	3812.99	1695.52	970.223	2774.77	2467.51	4243.21	3257.24	440.282	589.125	577.372	3436.44	1341.02	1683.47	7402.95	4362.75	565.591	509.914	2774.65	2699.3	4430.06	2628.41	1083.23	2123	3045.13
369	tr|A0A5C2FV72|A0A5C2FV72_HUMAN	IGL c672_light_IGKV3-20_IGKJ3 (Fragment) OS=Homo sapiens OX=9606 PE=2 SV=1	2943.03	2896.57	2684.47	3431.7	39215.3	38692.4	11723.2	11108.1	3565.59	3805.62	7038.57	8401.3	3019.18	1813.1	2671.69	1084.7	2421.19	2379.13	8109.03	7851.54	4379.83	3768.46	5577.99	6095.53	6393.71	4292.2	3585.73	4182.48	3439.45	2564.99	11430.3	12693	10156.1	10566.9	2457.66	3148.89	12271.1	9180.84	12296.8	13066.9	1538.88	1423	1116.9	4891.91	476.675	6337.71	5966.4
370	tr|A0A5C2FXX9|A0A5C2FXX9_HUMAN	IGL c1742_light_IGKV3-20_IGKJ4 (Fragment) OS=Homo sapiens OX=9606 PE=2 SV=1	3981.42	3074.12	2341.14	4786.66	3178.67	1561.5	6636.96	4381.25	135.293	3441.88	9184.57	8968.91	6737.62	3414.62	3430.15	1148.69	5377.74	258.923	7364.75	3198.87	4149.36	5202.29	6666.15	4942.6	12924.1	14319.3	2318.73	4220.16	892.774	1197.14	2619.23	8212.24	10603.2	8471.87	2437.65	2160.4	3712.21	8020.55	10403.3	7284.31	141.933	241.63	289.072	1082.11	2850.21	920.136	1546.62
371	tr|A0A5C2GJ91|A0A5C2GJ91_HUMAN	IG c484_heavy_IGHV3-30_IGHD3-22_IGHJ5 (Fragment) OS=Homo sapiens OX=9606 PE=2 SV=1	2078.42	1252.41	1107.62	1004.16	2885.89	2277.93	484.165	3441.83	2109.56	1821.9	606.361	1583.59	933.176	833.131	1237.24	1421.85	2830.5	406.233	6693.5	1775.65	2320.48	4741.34	3005.55	1508.02	1170.38	1701.53	1755.55	728.964	538.818	1291.26	2056.51	1694.47	2770.67	2897.79	898.569	843.94	203.073	1953.71	735.661	2786.95	878.565	430.851	336.626	899.266	934.576	2681.82	2693
372	tr|A0A5C2GJK5|A0A5C2GJK5_HUMAN	IG c281_light_IGKV3-15_IGKJ4 (Fragment) OS=Homo sapiens OX=9606 PE=2 SV=1	2632.73	1741.32	1909.83	3552.77	4565.26	1739.49	6328.45	4541.35	4614.13	1089.9	2229.37	4552.86	5304.34	4397.59	2350.09	891.499	2416.16	417.511	1269.82	3460.14	4809.46	862.915	408.795	2654.13	1491.26	1819.28	150.968	4719.22	3255.78	3495.49	1792.67	1718.62	574.119	4261.92	849.042	322.87	2562.29	467.732	1219.76	406.597	2083.13	1545.31	557.448	1378.27	1185.65	3628.43	1490.63
373	tr|A0A7T0PYQ4|A0A7T0PYQ4_HUMAN	Immunglobulin heavy chain variable region (Fragment) OS=Homo sapiens OX=9606 PE=2 SV=1	3512.61	3244.5	3090.41	1633.83	4795.33	4976.73	7161.07	4336.91	7039.91	5848.69	1128.72	4318.71	8331.32	7808.14	1480.54	1103.36	1645.62	1130.45	3888.02	3439.11	1538.84	4174.06	3579.46	3471.58	2338.03	2679.56	3133.24	6746.94	1321.06	1357.17	821.35	5144.2	2771.49	2460.71	2939.66	4791.62	4058.43	3870.35	3452.57	3071.83	1889.55	1017.5	1723.95	2002.39	3672.6	9224.79	1809.76
374	tr|A0A5C2GCN1|A0A5C2GCN1_HUMAN	IGH + IGL c438_light_IGLV1-47_IGLJ3 (Fragment) OS=Homo sapiens OX=9606 PE=2 SV=1	672.936	610.38	345.001	724.832	2153.03	2238.1	2361.88	2879.63	1133.69	1164.96	1721.99	1002.92	825.299	1098.82	353.388	1034.9	366.398	1232.43	1553.89	690.997	854.017	1562.05	812.056	1189.19	274.434	537.975	909.946	4110.62	567.273	852.967	1020.1	24346.7	2508.03	1698.6	638.363	600.015	1894.01	679.519	25548.3	25502.6	347.486	744.252	703.052	639.535	547.525	776.918	901.617
375	tr|L7UYB8|L7UYB8_HUMAN	Glycoprotein Ib alpha polypeptide G942 deletion mutant OS=Homo sapiens OX=9606 GN=GP1BA PE=2 SV=1	4809.59	5689.89	2398.66	3934.82	950.437	5898.33	6768.11	5504.36	3720.17	4164.85	2922.76	1919.43	8496.62	7088.92	3533.89	2154.43	2691.4	2142.14	833.303	4145.76	4338.45	6434.52	2616.57	2286.21	3712.17	3100.85	1914.25	5495.67	5529.37	3388.35	6495	4750.46	2509.31	2722.18	3115.46	4787.99	2904.76	2305.63	4552.13	7074.36	1135.68	2113.64	3060.65	2653.87	4443.52	6929.56	3994.08
376	tr|D3DQH8|D3DQH8_HUMAN	Osteonectin OS=Homo sapiens OX=9606 GN=SPARC PE=3 SV=1	365.338	1365.59	210.658	1193.95	1631.96	1263	752.296	1556.05	1853.22	1197.09	728.094	692.395	1678.86	795.143	1187.25	493.603	310.237	634.679	1344.76	1045.28	942.494	1324.81	1372.93	906.588	2005.22	564.805	1378.93	777.849	1305.18	642.501	1351.4	1063.08	1561.04	870.159	250.997	479.064	1315.95	1613.91	1531.81	2297.3	922.896	847.856	825.934	365.603	751.632	1275.56	1190.69
377	tr|A0A7S5EW56|A0A7S5EW56_HUMAN	IGH c123_heavy_IGHV3-23_IGHD1-26_IGHJ4 (Fragment) OS=Homo sapiens OX=9606 PE=2 SV=1	1115.78	560.581	403.135	635.699	552.108	1199.27	8839.66	628.682	2017.35	1221.54	308.609	1271.21	939.178	641.718	429.841	373.508	666.906	754.931	893.257	2455.95	9823.65	983.255	328.568	256.266	969.595	1045.56	557.409	1123.71	184.85	15922.5	976.036	828.775	1536.87	1121.13	1279.51	1153.95	7571.45	12458.2	513.946	1395.99	2094.27	773.608	1253.18	1980.93	1086.19	7783.77	3982.01
378	sp|P03951|FA11_HUMAN	Coagulation factor XI OS=Homo sapiens OX=9606 GN=F11 PE=1 SV=1	4941.62	10953.4	8658.67	6828.53	6293.28	7053.4	4819.03	7419.34	1169.59	1822.66	4652.53	10976.3	8402.79	8330.09	3818.18	8264.15	2035.88	4759.93	13068.4	4795.95	10392.7	12866	11129.4	6682.86	4112.37	8058.62	9987.27	5319.46	4357.47	10944.2	2967.17	4728.34	8588.88	2952.71	3556.65	5846.92	9520.43	11714.7	5725.28	9176.55	6882.52	5186.91	4887.99	8465.5	7162.11	12373	10273.7
379	tr|A0A5C2GRX2|A0A5C2GRX2_HUMAN	IG c1230_heavy_IGHV4-39_IGHD2-2_IGHJ2 (Fragment) OS=Homo sapiens OX=9606 PE=2 SV=1	6304.81	3840.36	999.245	7540.18	5255.53	5398.23	16316.7	11857.6	13226.1	7680.74	9110.59	8091.52	5400.22	3345.08	8503.41	7787.97	3892.3	6111.49	13065.6	2629.81	13572.8	16910.7	8934.83	4303.44	11854.2	10653.5	22333.9	15070.8	4546.38	529.35	6307.7	281.846	9509.6	9793.3	3911.27	3522.93	11217.7	6596.19	8203.5	8555.92	735.677	1063.5	567.452	1197.73	2449.06	9624.09	8761.7
380	tr|A0A7T0PXM4|A0A7T0PXM4_HUMAN	Immunglobulin kappa chain variable region (Fragment) OS=Homo sapiens OX=9606 PE=2 SV=1	3870.59	19254.4	45335.8	44389.6	47602.5	50690	12125.1	37003.2	50869.1	62467	19944.3	11815.9	36904.7	21233.7	19565.7	18517.4	10567.6	9686.76	18522.8	24244	19438.3	18503.1	28899.2	27784.2	17583.9	38682.4	22933.7	3462.4	4234.51	15337.4	35643.6	39062.5	50297.1	50399.2	2458.29	15224.2	7608.92	36880.5	23152.7	25764.2	12721.8	5529.94	5284.79	7092.7	11880.9	12495.7	13631.5
381	tr|A0A7S5EUV5|A0A7S5EUV5_HUMAN	IGH c242_heavy_IGHV3-30_IGHD3-9_IGHJ5 (Fragment) OS=Homo sapiens OX=9606 PE=2 SV=1	1163.79	900.262	807.411	760.677	1131.83	359.384	918.812	919.143	1103.27	1165.52	936.04	408.694	1058.04	175.539	2022.28	597.86	1659.08	605.767	1113.73	1725.75	3388.88	2287.26	843.459	1056.39	439.216	438.385	1295.35	788.375	697.619	173.375	333.072	653.857	1539.23	483.412	332.439	309.821	2662.87	1337.64	450.64	111.204	11835.1	14286.6	15204.1	16667.6	14759.1	10718.3	11669.8
382	tr|Q5FWF9|Q5FWF9_HUMAN	IGL@ protein OS=Homo sapiens OX=9606 GN=IGL@ PE=1 SV=1	1752.93	5046.96	133.028	5129.84	1460.29	2984.06	132235	3653.28	17618.1	2023.42	2531.92	4493.19	19301.8	839.716	350.033	97042.9	174.844	1486.55	1976.11	2339.22	4858.24	3565.2	2148.45	687.953	6104.29	9606.22	12902.6	132328	23336.8	25555.7	353.664	10243.2	16723.7	5998.56	2921.96	2121.92	2157.5	3660.96	3199.36	54467.4	4335.78	14143.8	4876.06	14477.4	4264.77	6918.07	1684.4
383	tr|A0A5C2G9J5|A0A5C2G9J5_HUMAN	IGL c495_light_IGKV3-20_IGKJ1 (Fragment) OS=Homo sapiens OX=9606 PE=2 SV=1	3943.07	1807.11	2695.8	4818.05	317.786	1559.37	1640.16	11102.3	10405.7	10359.3	6881.5	342.982	2427.87	1434.45	606.282	2003.13	1170.28	428.866	2190.13	3194.71	3095.42	3276.75	5377.98	5130.17	3196.55	4506.89	8562.47	10553.4	1382.63	403.832	4461.44	4766.63	6251.56	4308.52	271.993	2991.03	11200.9	10255.7	5955	5758.29	1826.39	372.917	802.071	1750.16	854.043	614.459	1920.86
384	tr|A0A5C2GCU1|A0A5C2GCU1_HUMAN	IGL c4153_light_IGKV3-20_IGKJ4 (Fragment) OS=Homo sapiens OX=9606 PE=2 SV=1	122611	103715	906.06	47873.7	191166	9429.91	6843.45	917.051	78372.6	5162.12	146629	171905	60712.7	1589.34	61155.8	58172.7	256.043	307.964	117662	132656	111525	116221	120094	104714	115303	117206	76670.9	57870.6	2542.64	1341.98	3767.86	2848.49	159409	148883	78029.6	1228.53	160785	148684	1124.72	4499.26	79602.9	278.655	398.051	1088.24	798.074	459649	441366
385	tr|A0A125QYY4|A0A125QYY4_HUMAN	GCT-A7 heavy chain variable region (Fragment) OS=Homo sapiens OX=9606 PE=2 SV=1	20553.2	25384	19520.5	20550.4	29892.1	9678.12	6032.29	23991.9	5289.03	21566.5	22780.4	26235.7	13266.3	1466.11	9828.69	7485.02	8167.9	9688.55	4160.68	1045.51	20795.9	22057.7	12858.3	1596.74	27546.1	29066.4	22437.6	28187.2	18288.6	8400.73	8426.03	1164.42	19395.3	5231.1	4144.87	2282.48	34293.7	30060.1	18643.7	2353.84	12954.7	16487.4	16837.8	937.476	1154.87	63425.1	62840.1
386	tr|A8K6C1|A8K6C1_HUMAN	Cholesteryl ester transfer protein OS=Homo sapiens OX=9606 PE=2 SV=1	884.496	174.053	3698.28	1592.5	9883.71	10020.7	4248.31	991.881	8042.41	1238.27	686.349	9004.56	1240.95	1429.95	1170.72	12049.4	1554.95	788.797	9898.58	648.344	2463.84	2155.63	470.116	531.501	2260.03	2536.73	1579.57	1551.62	16976.9	16057.8	9079.55	4694.17	1001.92	1893.96	985.006	526.534	160.902	1001.59	1520.11	9311.8	264.578	383.814	510.005	5623.02	558.499	559.906	962.511
387	tr|A0A5C2FU04|A0A5C2FU04_HUMAN	IGL c441_light_IGKV3D-15_IGKJ1 (Fragment) OS=Homo sapiens OX=9606 PE=2 SV=1	10241.4	13265.2	8808.36	8999.36	18640.1	18151.3	31580.8	23245	11802.3	22773.1	527.145	11399	12000.7	14899.8	6747.23	17834.3	7280.04	19799.1	30818.8	10741.7	17167.4	33653.3	12048.5	13110.8	14972.9	21815	13742.2	6194.22	8459.88	2194.56	9183.94	10296.5	4295.83	9412.74	3039.49	3502.06	8685.96	10403.4	7247.48	6764.8	1268.74	1055.47	8793.27	1129.09	2587.41	8297.07	8745.2
388	tr|A0A5C2G851|A0A5C2G851_HUMAN	IGL c547_light_IGKV4-1_IGKJ2 (Fragment) OS=Homo sapiens OX=9606 PE=2 SV=1	2345.48	2226.45	176.128	845.671	2882.7	1943.09	3010.61	4285.52	6153.13	5452.83	3016.21	1839.92	169.053	207.141	359.043	309.306	154.092	284.622	1595.96	1787.41	1724.52	617.5	2750.15	3572.79	2190.99	2227.4	2141.66	3933.11	313.338	254.025	3566.33	3863.87	7198.62	5797.5	719.649	460.867	4388.84	3234.34	4041.55	1583.89	328.863	788.046	803.153	110.88	165.409	1050.96	1082.93
389	tr|A0A5C2GHY7|A0A5C2GHY7_HUMAN	IG c1258_heavy_IGHV1-18_IGHD3-16_IGHJ5 (Fragment) OS=Homo sapiens OX=9606 PE=2 SV=1	214.057	1379.19	4214.19	3376.85	3118.69	1412.33	14535.2	14644.8	11634.1	2767.25	595.432	718.111	5338.06	2425.61	1164.09	2278.66	1326.7	2061.79	1124.08	7238.9	6388.29	4171.04	349.582	3779.3	3948.45	11090.7	3291.17	2519.88	137.372	1729.73	5880.03	5596.51	7499.82	7116.94	693.627	198.327	6112.32	4079.57	6014.04	6523.02	689.448	405.702	169.028	468.676	853.867	8553.67	8905.06
390	tr|A0A5C2GF52|A0A5C2GF52_HUMAN	IG c259_heavy_IGHV1-2_IGHD3-16_IGHJ3 (Fragment) OS=Homo sapiens OX=9606 PE=2 SV=1	3617.53	841.301	332.2	172.352	2172.13	114.597	2163.06	387.398	2632.42	2548.03	319.22	782.911	3366.67	473.616	370.639	463.942	253.057	276.799	830.89	2312.67	135.168	177.668	404.753	2857.14	1039.16	3627.57	970.505	1413.81	3462.21	971.173	1879.62	1543.88	2176.6	1187.27	2889.03	2868.66	1605.62	2259.79	994.407	2319.81	491.941	462.748	372.928	1059.41	135.1	3567.4	2590.79
391	tr|A0A5C2G6H5|A0A5C2G6H5_HUMAN	IGH c192_heavy__IGHV3-74_IGHD5-18_IGHJ6 (Fragment) OS=Homo sapiens OX=9606 PE=2 SV=1	561.495	392.551	368.951	844.718	1120.12	643.891	1499.81	3721.14	508.987	232.938	282.901	2745.09	376.916	735.798	2211.4	927.232	635.77	282.437	1111.19	857.128	665.95	1223.66	1576.55	510.115	2373.17	2446.25	813.433	1643.39	942.426	730.845	2503.31	2781.36	3312.26	3018.14	1751.93	1048.04	540.79	656.844	842.879	447.136	1237.46	786.218	374.576	623.501	338.011	792.814	722.946
392	tr|A0A5C2GP46|A0A5C2GP46_HUMAN	IG c603_heavy_IGHV3-49_IGHD2-8_IGHJ4 (Fragment) OS=Homo sapiens OX=9606 PE=2 SV=1	1667.19	1966.44	3402.51	3202.52	8197.58	8015.34	8188.49	7575.6	7793.42	7952.16	257.89	317.384	2246.11	5374.47	718.744	1930.69	3179.55	2777.96	4925.32	3021.82	6611.24	8678.65	7836.82	7711.15	6445.8	6929.14	5021.19	6166.2	3233.07	2550.62	3241.55	9187.72	7730.46	11157.8	3355.92	3429.49	6453.14	5700.01	4125.67	4167.99	602.052	1413.43	1073.62	477.203	585.701	1490.48	1289.2
393	tr|A6XND1|A6XND1_HUMAN	Insulin-like growth factor-binding protein 3 OS=Homo sapiens OX=9606 PE=2 SV=1	4283.94	4327.79	4132.76	4546.57	1910.09	3158.69	6914.81	9433.47	10078.3	8312.95	8375.81	3309.69	8310.5	8975.4	8054.08	6872.25	2936.52	3618.75	5318.52	8444.35	13651.8	13240.9	11376.9	12928	12634.8	11601.7	7544.82	11256.8	14319	15251.5	2681.9	3287.29	6586.43	1353.79	5616.95	7227.78	3807.23	3214.17	7189.02	7060.26	3659.59	3088.94	4015.88	2649.24	5287.94	3453.13	2924.76
394	tr|A0A7S5EUT4|A0A7S5EUT4_HUMAN	IGH c1335_heavy_IGHV3-11_IGHD4-23_IGHJ4 (Fragment) OS=Homo sapiens OX=9606 PE=2 SV=1	5186.96	90467.4	1498.39	2743.42	69944.2	4053	247.449	99616.4	1566.35	963.092	129834	894.781	2455.64	73223.8	82620.9	129508	139.032	63384.1	92280.4	3047.21	3892.58	1827.45	729.722	1626.26	63642.6	821.452	3102.74	2657.88	408.36	1217.86	2941.05	3333.86	1252.87	1491.89	2423.88	50847.9	888.375	306.842	2088.63	2977.5	17637	1305.47	157.117	2275.39	39068.8	21714.9	20510.8
395	tr|A0A7S5BXJ3|A0A7S5BXJ3_HUMAN	IGH c278_heavy_IGHV3-33_IGHD3-3_IGHJ5 (Fragment) OS=Homo sapiens OX=9606 PE=2 SV=1	5743.52	4571.12	528.939	584.861	471.178	4845.03	502.374	5506.88	7056.02	6940.9	128.703	814.61	415.466	3494.01	6401.23	1362.26	299.464	697.823	3439.64	2069.76	3428.21	2041.33	297.306	2033.57	1344.48	3697.91	635.054	182.551	299.703	8091.45	3690.72	1635.79	3015.2	1024.47	2616.81	1062.26	3839.92	4067.12	1276.31	1677.54	698.101	769.587	1028.22	1355.78	513.063	2156.75	1421.33
396	tr|A0A5C2GRQ1|A0A5C2GRQ1_HUMAN	IG c559_heavy_IGHV3-53_IGHD3-9_IGHJ2 (Fragment) OS=Homo sapiens OX=9606 PE=2 SV=1	13857.6	3459.59	21577.3	33443.8	20496.3	22448.6	38664.3	29814.4	8669.06	12696.4	15045.8	15247	40234.1	37659.1	7169.42	12065.9	8002.36	5921.43	22594.1	8416.49	20934.1	23935.7	3319.2	14424.6	41267.5	31522.6	23968.1	23671.7	10563.1	8580.47	12628.1	25957.5	21904.6	15945.6	9577.58	7894.18	25668.7	23693.1	21569.3	16625.7	9071	3290.69	6214.7	6133.38	9499.07	27266.4	27122.7
397	tr|A0A5C2G456|A0A5C2G456_HUMAN	IGL c2247_light_IGLV1-36_IGLJ3 (Fragment) OS=Homo sapiens OX=9606 PE=2 SV=1	1998.68	1333.01	3778.65	2377.98	155.467	521.981	5170.2	5836.97	1738.69	3624.73	3145.87	1349.85	4487.33	244.155	1751.76	1773.11	1807.23	1095.09	3560.3	617.608	2321.74	358.081	5195.02	4161.48	162.686	191.896	3792.8	5097.58	4447	1279.79	7794.12	8199.53	1358.97	2222.14	1513.88	373.303	759.632	4814.14	3836.27	299.717	2430.73	2250.18	1523.45	2157.31	2390.23	1153.46	411.006
398	tr|A0A5C2G7V5|A0A5C2G7V5_HUMAN	IGL c594_light_IGKV3-20_IGKJ1 (Fragment) OS=Homo sapiens OX=9606 PE=2 SV=1	207.287	578.194	226.543	458.853	176.583	611.139	1173.42	322.182	1492.26	1020.48	436.582	848.544	231.63	1211.44	1130.1	594.515	884.494	345.355	1047.5	562.918	525.462	229.404	305.931	321.767	2707.78	1580.81	387.225	201.502	2065.27	886.814	707.591	579.388	244.498	1562.8	1342.7	1307.54	2498.35	1972.71	509.643	800.318	336.269	1671.03	114.984	1728.81	859.46	1316.78	1073.4
399	tr|S5FLF7|S5FLF7_HUMAN	Lipoprotein B (Fragment) OS=Homo sapiens OX=9606 GN=APOB PE=4 SV=1	9366.87	6592.37	176.036	275.76	371.413	359.547	518.792	264.054	274.169	209.352	192.611	452.49	806.528	649.446	270.955	380.46	2841.95	3793.99	959.413	648.072	148.453	146.167	246.582	124.674	237.996	198.327	2873.18	3869.4	126.99	465.953	3194.86	7239.07	722.072	445.448	512.276	465.599	254.004	327.241	604.961	335.447	4115.86	373.217	1530.98	5028.36	5170.8	3184.61	3392.27
400	tr|A0A5C2GJF4|A0A5C2GJF4_HUMAN	IG c470_heavy_IGHV3-33_IGHD1-26_IGHJ4 (Fragment) OS=Homo sapiens OX=9606 PE=2 SV=1	2745.47	3494.18	848.742	492.746	633.406	489.193	3894.24	5117.68	7274.43	11211.1	0	332.011	159.145	229.545	0	61.2727	245.941	236.798	310.695	507.145	334.846	1147.87	485.262	526.341	709.706	168.691	123.395	237.293	169.535	147.65	534.481	145.657	86.3927	148.278	325.2	377.04	1423.98	769.316	174.875	325.586	651.265	63.1636	440.114	305.454	169.257	104.844	188.026
401	tr|A0A5C2GER5|A0A5C2GER5_HUMAN	IG c1063_heavy_IGHV3-33_IGHD1-1_IGHJ3 (Fragment) OS=Homo sapiens OX=9606 PE=2 SV=1	865.382	1476.8	343.788	251.514	2734.6	1102.77	4861.03	5645.59	5586.75	5220.59	1051.21	205.681	761.447	1474.38	756.17	1832.85	609.299	278.9	460.386	433.159	2155.71	1175.95	652.092	1065.77	673.128	1086.97	2586.98	468.975	306.853	858.752	1690.95	1031.05	2055.32	3671.91	989.345	1119.34	721.792	606.647	382.059	1746.73	1242.82	123.26	244.559	406.921	1127.32	930.962	1600.46
402	tr|A0A5C2G775|A0A5C2G775_HUMAN	IGL c2293_light_IGKV3-20_IGKJ1 (Fragment) OS=Homo sapiens OX=9606 PE=2 SV=1	1229.24	2288.87	1449.75	4016.1	6107.27	6758.4	9331.82	9692.01	9334.58	6741.97	10107.4	13627.5	6379.83	7252.78	2896.18	2659.56	3064.19	1223.88	9831.34	5035.86	3595.88	5461.8	8279.8	9046.18	3845.22	3547.67	9542.85	6348.34	843.878	1614.53	8788.37	9329.87	8826.48	8278.31	3085.14	5786.34	9360.8	5664.76	9955.97	5685.12	2878.03	2442.51	2801.66	1249.93	2171.39	1909.71	3365.8
403	tr|A0A5C2GJM6|A0A5C2GJM6_HUMAN	IG c650_light_IGKV4-1_IGKJ1 (Fragment) OS=Homo sapiens OX=9606 PE=2 SV=1	5637.55	6373.64	7923.01	3491.41	13950.8	18934	21614.2	16610	11071.7	10923.7	6596.7	8025.57	1062.43	3986.69	8082.74	4502.93	853.421	1471.91	8006.98	14757.3	11005.1	7633.64	2803.43	5870.69	7939.43	4845.85	2628.9	8748.35	1534.03	1746.8	5715.47	5394.09	6682.33	14870	6397.94	3963.84	11554.8	8054.98	6716.8	7117.18	2855.68	3991.48	4123.26	5341.03	3102.51	13396.9	10577
404	tr|A0A5C2GT30|A0A5C2GT30_HUMAN	IG c701_heavy_IGHV3-33_IGHD5-24_IGHJ2 (Fragment) OS=Homo sapiens OX=9606 PE=2 SV=1	6181.13	813.178	841.028	3725.56	5086.58	5874.9	22257	22698	2950.74	5522.96	5063.78	3340.26	631.085	5950.09	1898.48	876.666	2641.74	2523.14	1320.4	6445.62	9679.33	10386	3159.2	3173.97	3197.67	3879.5	2947.17	3426.16	4228.33	2257	4632.87	6696.52	7526.01	10108.6	735.331	704.655	1784.95	5694.25	6081.24	8361.37	15872	15543.4	15901.5	15966.4	18669.7	12462.5	10825
405	tr|A0A5C2GGV5|A0A5C2GGV5_HUMAN	IG c110_light_IGKV4-1_IGKJ4 (Fragment) OS=Homo sapiens OX=9606 PE=2 SV=1	757.493	3521.58	811.845	1365.59	701.279	552.896	970.587	1384.08	229.053	1009.38	3109.41	656.942	2914.29	3033.8	3020.67	510.088	304.146	1535.95	5127.1	4378.64	168.875	692.937	751.837	1816.15	2897.48	2226.68	1371	1287.1	532.973	760.831	3264.05	568.097	272.917	1298.5	1399.53	166.773	167.115	331.595	598.465	1444.57	191.611	167.098	276.012	258.607	419.723	4413.84	3231.55
406	sp|P35908|K22E_HUMAN	Keratin, type II cytoskeletal 2 epidermal OS=Homo sapiens OX=9606 GN=KRT2 PE=1 SV=2	1010.65	502.253	97.4466	2974.11	1052.36	1017.93	1104.1	229.483	1736.19	702.206	1337.85	709.292	579.664	512.302	4272.69	1985.25	530.087	643.671	1586.11	449.572	2487.31	2976.36	1089.69	488.728	3230.37	227.209	151.298	1599.81	1124.41	1669.41	111.8	3676.59	2340.78	2433.6	907.862	376.093	1579.66	1453.69	403.698	779.43	720.36	377.05	83.0131	687.943	150.271	1590.91	405.196
407	tr|S6BGD4|S6BGD4_HUMAN	IgG H chain OS=Homo sapiens OX=9606 PE=2 SV=1	22522.8	23994.8	3458.7	3509.1	3914.45	5591.77	12768.9	14918.8	34891.4	49190.4	20238.5	26598.2	3985.36	4209.9	12486.3	23489.6	2225.34	670.86	30894.9	29753.7	4403.23	38283.4	23083.8	18123.8	5011.27	4327.15	7197.42	5273.86	2696.74	1548.1	817.893	4152.08	5253.92	5781.82	2443.14	2741.98	32997.2	14434.8	7137.65	926.221	754.216	1284.16	686.882	1343.07	326.444	1597.33	2435.07
408	tr|A0A7S5EU24|A0A7S5EU24_HUMAN	IGH c1471_heavy_IGHV1-69_IGHD3-10_IGHJ5 (Fragment) OS=Homo sapiens OX=9606 PE=2 SV=1	1715.12	1489.29	800.328	302.883	1827.29	2219.35	7809.08	5857.14	2132.07	2542.48	1155.94	1560.31	614.731	326.284	1362.02	1652.88	1633.22	634.956	2051.82	1091.76	2132.06	3097.45	1998.6	2487.05	746.467	469.071	698.719	1317.39	2970.5	2638.14	4233.24	10139.8	5621.99	6253.22	1906.43	2275.93	6120.67	1361.23	1037.27	963.727	1918.21	815.284	664.203	1514.78	1377.57	1692.24	2479.6
409	tr|A0A5C2GHB7|A0A5C2GHB7_HUMAN	IG c677_heavy_IGHV3-9_IGHD6-13_IGHJ4 (Fragment) OS=Homo sapiens OX=9606 PE=2 SV=1	5187.85	2912.2	393.389	379.831	5432.38	1523.16	3315.27	4062.17	1235.91	1687.42	2909.34	1712.51	4668.55	1969.47	12842.6	9118.87	434.199	1877.48	17185.9	5888.85	6937.88	8903.65	4760.88	649.81	3729.4	2925.3	2480.67	5273.99	8087.33	8382.48	4012.03	4394.53	6118.58	5303.73	2543.43	2502.55	206.027	462.362	2315.57	2084.4	178.498	365.984	394.305	2611.56	391.872	1562.43	1055.28
410	tr|A8K335|A8K335_HUMAN	Folate gamma-glutamyl hydrolase OS=Homo sapiens OX=9606 PE=2 SV=1	333.847	149.549	1348.1	1767.36	515.459	612.083	790.372	679.661	743.055	910.004	0	382.674	880.23	678.777	840.816	0	200.848	698.367	427.786	0	207.56	233.658	1683.9	1428.81	556.139	434.881	1317.78	1360.11	442.7	1136.79	1911.24	2131.4	2487.86	843.97	840.323	1159.28	726.041	1913.97	698.071	685.391	905.413	964.858	511.064	1207.9	134.743	3136.86	645.102
411	tr|A0A5C2G1W3|A0A5C2G1W3_HUMAN	IGL c3261_light_IGKV1-39_IGKJ1 (Fragment) OS=Homo sapiens OX=9606 PE=2 SV=1	99973.6	104156	153610	134520	262678	283258	253181	249468	96425.6	95099	110609	117214	84480.1	94709.6	87081.8	75170.1	45699.4	48457.3	118241	104146	118220	127559	139162	150858	148874	149880	94998.2	97109.5	59007.6	54032.7	118058	127472	183422	196951	115058	119557	175416	169727	154287	171918	60609.5	51338	50549.2	49958.7	61102.4	102871	91405.5
412	tr|A0A5C2GPU5|A0A5C2GPU5_HUMAN	IG c893_heavy_IGHV3-15_IGHD3-16_IGHJ4 (Fragment) OS=Homo sapiens OX=9606 PE=2 SV=1	881.322	305.499	474.859	1024.04	1347.64	1631.64	2579.94	2746.98	632.745	1586.76	677.231	3050.5	1140.8	713.867	1843.22	5366.16	4020.5	148.354	890.055	2914.58	1302.3	1060.29	1430.99	2209.72	1290.99	1010.48	471.307	1381.36	1605.77	193.79	868.497	1312.04	130.091	1465.24	721.842	236.675	859.345	150.703	1235.78	1237.18	497.057	652.377	309.94	785.991	392.735	6967.61	5781.37
413	tr|A0A7S5EXF6|A0A7S5EXF6_HUMAN	IGH c3227_heavy_IGHV1-18_IGHD3-10_IGHJ4 (Fragment) OS=Homo sapiens OX=9606 PE=2 SV=1	2389.18	2954.82	1426.42	2362.68	10188.7	2104.05	9101.88	6755.06	5037.59	3783.34	3729.35	6682.39	9022.65	7411.97	2601.01	3560.07	913.172	2628.94	6345.38	10914	6844.79	6733.08	4209.31	4783.04	8894.1	6287.89	4186.29	1516.93	4122	2244.68	5173.39	2360.03	5441.36	5995.34	2740.47	4410.7	8647.68	12148.6	4562.94	3004.77	14862.4	13710.2	10853.3	12384.7	14906.8	47634.8	44793.8
414	tr|A0A5C2GJ36|A0A5C2GJ36_HUMAN	IG c844_light_IGKV2D-29_IGKJ4 (Fragment) OS=Homo sapiens OX=9606 PE=2 SV=1	3243.11	2904.96	2819.07	3388.59	4193.65	4002.08	5220.77	4408.07	4311.51	1893.96	4397.08	4624.07	5342.11	2390.65	485.817	1660.4	2827.55	1915.7	919.721	4562.84	3648.78	3566.14	3234.43	4152.78	2127.28	3219.73	3326.6	1756.67	5433.74	4761.82	5884.51	5743.26	2627.78	3532.24	972.446	1950.35	1194.1	126.78	6753.9	7521.67	3791.98	4616.62	413.649	3647.28	48252.5	878.734	5147.4
415	tr|A0A096LPE2|A0A096LPE2_HUMAN	SAA2-SAA4 readthrough OS=Homo sapiens OX=9606 GN=SAA2-SAA4 PE=3 SV=1	33318	33127.7	50217.9	53351	18298.4	21548.5	36588.9	34954.6	32379.9	29895.7	32292.3	34052.7	29918.7	31413.5	25075	25669.3	24494.8	24786.8	28687.9	25453.7	33410.3	35311.5	38003.4	46997.4	30458.6	32075.8	23046.8	27193.6	42275.8	37979.5	53765.5	62770.4	42483.7	39621.2	35135.7	34924.2	34399.1	30824.5	48507.5	56306.1	52890.5	46434	47506.9	45581.3	53457.9	41480.6	30895.4
416	tr|A0A5C2G130|A0A5C2G130_HUMAN	IGL c2250_light_IGLV3-10_IGLJ3 (Fragment) OS=Homo sapiens OX=9606 PE=2 SV=1	727.185	2755.08	791.412	1360.56	1954.44	3150.81	3035.88	3923.3	413.997	1746.91	1769.28	2129.53	1275.69	886.741	2187.38	2363.16	1219.53	1942.83	444.402	7127.74	1503.72	1964.64	2164.35	1375.26	2447.08	2256.55	3647.1	2737.12	1285.11	922.823	4411.35	4719.81	1323.97	784.602	1234.81	1707.18	2297.43	1242.67	731.315	1316.64	949.488	931.317	724.452	916.056	390.35	1023.06	5981.52
417	tr|A0A5C2FZE3|A0A5C2FZE3_HUMAN	IGL c617_light_IGKV3-11_IGKJ4 (Fragment) OS=Homo sapiens OX=9606 PE=2 SV=1	29939.1	28042.5	16462.5	18894.8	38344.7	40812.8	189603	188420	42854.5	40922.7	17829.3	19538.3	19163.3	17140.2	15696.8	20090.8	25984.7	23974.4	31134.4	31615.4	24609.5	24941.1	19980.8	21236.7	26208.2	30206.7	24428.3	27370.8	14698	14947.7	25322.7	22812.4	40628.6	41651.7	24889.9	24762	37061.7	29684.3	34395.2	34568.1	3824.53	2842.12	2794.25	234.055	4478.18	8629.02	10412.5
418	tr|A0A7S5BZL6|A0A7S5BZL6_HUMAN	IGH c620_heavy_IGHV1-69_IGHD3-22_IGHJ4 (Fragment) OS=Homo sapiens OX=9606 PE=2 SV=1	1489.36	283.796	2728.38	1466.16	2158.24	2346.06	417.931	908.055	1319.75	3423.9	2137.63	556.674	1295.38	1655.31	2582.23	289.853	1296.57	2686.45	6388.67	4133.21	4708.58	2755.13	2084.07	1880.46	2927.21	3548.64	445.793	3348.68	691.461	172.961	9840.85	3293.5	704.509	654.678	3408.86	1822.73	5815.95	4185.6	417.036	1908.9	1812.91	526.288	1684.46	915.374	1395.2	942.737	485.499
419	tr|A0A5C2GCB3|A0A5C2GCB3_HUMAN	IGL c223_light_IGKV1-27_IGKJ4 (Fragment) OS=Homo sapiens OX=9606 PE=2 SV=1	5564.05	1663.41	2499.77	1553.24	4441.25	5369.67	5840.89	6452.57	2772.13	7413.67	6258.57	5639.5	9145.9	6406.88	2573.17	1875.02	2362.65	1944.84	389.726	2685.9	3267.76	3528.17	2382.31	3193.52	9090.77	7989.82	2089.02	1940.61	1523.56	1638.74	4329.95	6224.71	4147.33	3624.56	4383.24	4227.11	5147.68	4279.76	8616.83	8374.76	1524.55	2263.51	6972.87	444.673	3651.16	4723.18	2906.33
420	tr|A0A5C2GK46|A0A5C2GK46_HUMAN	IG c1088_light_IGLV3-21_IGLJ2 (Fragment) OS=Homo sapiens OX=9606 PE=2 SV=1	677.064	349.896	174.868	421.424	798.418	611.28	460.444	1054.97	698.378	126.828	288.114	942.139	274.222	416.974	230.84	0	211.596	319.121	267.834	138.267	363.235	727.887	966.977	1481.02	696.04	320.477	118.028	427.725	667.163	272.101	634.266	365.342	840.678	950.867	1139.74	757.137	2085.47	2561.53	753.196	865.549	267.763	196.784	141.895	401.09	394.612	254.808	974.678
421	tr|A0A5C2GAW1|A0A5C2GAW1_HUMAN	IGL c562_light_IGKV1D-39_IGKJ1 (Fragment) OS=Homo sapiens OX=9606 PE=2 SV=1	1900.52	1863.78	3056.32	1225.76	3107.38	4318.72	5957.92	8113.74	5867.27	2936.85	2418.45	2314.52	449.758	2394.83	307.393	3918.23	1151.36	268.742	1273.02	4189.2	6394.8	5726.07	2266.47	2037.53	1761.52	2612.41	821.624	1897.47	138.884	1066.16	5345.81	8752.14	7351.18	6786.34	4716.84	4491.96	5572.35	9179.74	4498.57	4069.21	248.148	1505.08	264.761	732.503	194.573	2197.62	540.001
422	tr|A0A5C2GUK1|A0A5C2GUK1_HUMAN	IG c1101_light_IGKV1D-13_IGKJ1 (Fragment) OS=Homo sapiens OX=9606 PE=2 SV=1	5153.98	2789.02	24802.9	27513.9	9244.91	8193.37	10606.8	15841.9	9952.61	8686.19	6347.67	4818.95	7687.93	6867.79	2815.1	345.96	2291.27	3001.83	8617.24	3391.08	3730.8	1621.03	5532.31	7925.41	5163.56	5849	237.792	3335.87	1657.99	852.144	5947.1	5022.32	8807.34	5155.96	2270.02	1435.4	11545	4340.22	1830.71	1117.08	1230.37	4423.78	3942.19	3999.58	2930.03	1539.7	4229.99
423	sp|P48740|MASP1_HUMAN	Mannan-binding lectin serine protease 1 OS=Homo sapiens OX=9606 GN=MASP1 PE=1 SV=3	2197.22	2000.32	2175.55	2787.39	2275.4	1288.63	601.393	1152.83	596.432	1734.89	2497.33	341.797	2477.11	890.158	1261.41	1402.7	2284.76	253.613	305.974	1964.09	1154.41	2404.78	1884.6	734.672	2224.79	1496.37	3320.47	656.5	4806.55	2538.61	1952.31	806.175	674.843	3038.93	2866.96	2596.78	3908.31	3375.2	4118.37	1855.29	988.62	687.827	1955.11	1135.03	941.135	356.923	1271.23
424	tr|A0A5C2FXZ9|A0A5C2FXZ9_HUMAN	IGL c505_light_IGKV3-20_IGKJ5 (Fragment) OS=Homo sapiens OX=9606 PE=2 SV=1	2038.76	4944.55	1603.71	407.293	11905.9	9755.66	839.831	7456.64	9121.86	6599	1863.52	2197.05	2531.95	4663.13	730.02	13525.3	1461.05	5029.04	7844.57	1516.11	3450.38	3984.81	2561.8	3593.34	7441.99	4802.02	3097.7	4544.56	570.292	21082.3	3929.77	2395.49	8163.95	7346.29	3208.28	2089.65	5241.89	4368.06	623.064	610.405	2764.9	3472.68	1575.83	4832.03	5407.58	2643.07	1490.86
425	tr|S6AWF0|S6AWF0_HUMAN	IgG H chain OS=Homo sapiens OX=9606 PE=2 SV=1	7769.78	7054.52	3279.34	3396.42	6197.68	7553.92	12672.7	8506.79	8807.34	12774.5	3254.18	2198.07	11199.6	11062.9	9136.92	6775.09	6630.65	6173.59	9250.26	8846.34	18170.9	19359.1	8485.77	8849.1	7461.92	5426.7	5201.17	6984.76	3397.64	3546.69	8376.71	9655.35	11326.1	10478.8	4349.07	4295.8	11881.6	16604.3	7333.78	8327.74	2506.95	2205.06	3229.61	1775.4	324.814	30051.5	25207.5
426	tr|A0A7S5EUY1|A0A7S5EUY1_HUMAN	IGH c1530_heavy_IGHV3-11_IGHD6-13_IGHJ5 (Fragment) OS=Homo sapiens OX=9606 PE=2 SV=1	498.026	569.555	761.09	960.084	901.886	501.452	826.696	826.3	481.146	1128.73	4524.5	574.666	561.496	1553.61	891.698	1088.02	467.862	659.865	1876.91	1062.61	535.607	1050.51	575.616	450.796	1031.97	1215.18	1738.55	365.944	779.197	437.401	979.642	609.705	6556.18	5458.23	901.543	651.24	957.62	5528.2	1111.57	1312.2	286.988	361.705	354.395	354.746	2282.6	1000.01	749.604
427	tr|A0A5C2GMP2|A0A5C2GMP2_HUMAN	IG c123_heavy_IGHV3-30_IGHD3-3_IGHJ3 (Fragment) OS=Homo sapiens OX=9606 PE=2 SV=1	4856.73	4754.03	1460.72	726.479	847.327	1814.12	212.581	2844.07	2654.62	1448.32	305.046	1003.85	2171.64	959.189	365.091	2687.94	1257.91	381.377	1207.81	2592.1	646.241	4496.11	2074.82	1126.12	677.115	230.557	5919.87	4673.08	2004.63	1325.4	16807.5	18331.6	1067.79	1838.85	779.157	998.873	7200.79	6794.73	3682.12	4462.77	458.969	332.57	274.715	480.361	641.128	2133.15	304.591
428	tr|A0A5C2FVU8|A0A5C2FVU8_HUMAN	IGL c1049_light_IGLV1-40_IGLJ2 (Fragment) OS=Homo sapiens OX=9606 PE=2 SV=1	208.289	345.772	288.267	69.0078	9795.01	7330.53	166.403	407.569	231.423	888.486	388.083	1129.7	533.225	974.889	509.191	646.398	158.42	4511.27	334.306	645.077	344.283	833.029	510.584	379.582	162.854	251.437	1858.06	3044.88	189.645	162.754	332.937	595.6	6690.52	4637.77	2469.18	75.8141	7308.34	8051.01	553.899	239.591	1007.52	1104.92	164.905	495.006	1205.47	22734.3	18444.3
429	sp|Q9BRR0|ZKSC3_HUMAN	Zinc finger protein with KRAB and SCAN domains 3 OS=Homo sapiens OX=9606 GN=ZKSCAN3 PE=1 SV=2	2321.29	19205.5	7967.81	3362.28	3227.22	6003.71	11939.9	15462.2	4569	2276.05	4768.7	11461.7	5185.34	7342.82	8842.52	1507.91	8615.51	7790.08	4409.38	2746.18	9518.33	12460.4	6975.5	7310.43	5606.08	12550.9	1640.08	8855.35	14996.9	8056.7	3747.02	13685.6	3781.14	7888.07	7790.84	10678.2	4594.84	2690.69	8197.33	6413.89	4231	3358.14	744.103	4055.22	160.244	4467.39	5875.19
430	tr|Q6IBT3|Q6IBT3_HUMAN	T-complex protein 1 subunit eta OS=Homo sapiens OX=9606 GN=CCT7 PE=2 SV=1	214.982	875.65	239.949	1525.94	215.895	378.56	356.973	121.834	535.003	328.687	105.617	268.331	862.066	669.347	238.211	774.375	191.351	127.282	589.224	858.878	736.777	446.102	394.744	938.099	441.622	421.133	1190.29	1752.6	731.811	549.501	549.135	508.375	983.299	454.893	554.658	364.458	779.856	164.838	510.317	117.397	330.69	114.465	362.368	142.612	176.442	928.951	459.469
431	tr|A0A5C2GRR4|A0A5C2GRR4_HUMAN	IG c101_light_IGKV6D-21_IGKJ1 (Fragment) OS=Homo sapiens OX=9606 PE=2 SV=1	2926.74	2019.23	386.076	876.196	337.357	1390.35	4911.16	4034.24	2741.24	1976.23	278.745	533.971	705.995	683.916	216.938	471.336	442.596	310.249	285.708	930.251	763.536	1087.9	2360.82	1045.34	735.074	1198.46	913.233	398.02	233.286	382.483	306.098	1613.78	1318.34	334.107	334.01	595.174	5554.14	4437.26	681.531	286.517	420.499	235.244	933.396	310.139	943.77	575.818	290.605
432	tr|D3DNU8|D3DNU8_HUMAN	Kininogen 1, isoform CRA_a OS=Homo sapiens OX=9606 GN=KNG1 PE=4 SV=1	21958.1	28156.3	46469.3	34150.6	14441.1	21215.5	37101.1	28770.7	24854.2	66037	68442.7	63515	37682.9	20717.5	29395.4	23404.4	14520.1	37530.6	44812.5	28562.1	20358.7	25950.7	22578.9	246.455	24349.1	22672.7	12414.8	13495.9	32155.4	52599.2	1156.27	20822.2	24701.8	14034.2	11632.1	24425	46450.3	45583.6	17825.9	1365.37	60692.3	47602.7	55196.3	730.2	0	29757.5	57320.4
433	tr|A0A7S5BZ69|A0A7S5BZ69_HUMAN	IGH c987_heavy_IGHV3-30_IGHD1-26_IGHJ4 (Fragment) OS=Homo sapiens OX=9606 PE=2 SV=1	1009	774.622	2063.06	2388.15	168.997	595.462	847.91	1521.5	1579.36	736.105	588.01	156.24	432.56	229.515	277.473	641.102	668.813	411.934	1030.55	512.277	401.211	1252.28	1156.38	383.209	1317.15	1103.26	126.588	572.851	531.901	560.005	769.969	390.574	2571.92	1008.9	671.159	620.111	208.5	2095.82	2593.39	1984.4	391.686	381.415	674.021	202.187	330.163	481.772	280.534
434	tr|A0A5C2GIS3|A0A5C2GIS3_HUMAN	IG c768_heavy_IGHV4-61_IGHD6-19_IGHJ6 (Fragment) OS=Homo sapiens OX=9606 PE=2 SV=1	19127.2	20399.6	23513.1	22561.8	21851.8	23869.6	21979.1	22765.2	24277.2	26641.8	16065.4	18655.8	15784	18165	14800	10265.5	7190.48	8590.58	19446.4	10952.2	18234.3	18330.6	22238.2	23099.6	32875.5	29783.6	18938.2	19152.1	11929.9	11723.3	12857.2	15199.7	20207.3	15629.6	18167.3	15431.2	23047.3	22156.6	24612.2	24114.4	5745.9	9085.41	8954.98	7024.89	9635.43	27337.6	20140.5
435	tr|A0A5C2GG46|A0A5C2GG46_HUMAN	IGL c389_light_IGKV1D-39_IGKJ1 (Fragment) OS=Homo sapiens OX=9606 PE=2 SV=1	2778.94	2609.2	19450.9	15572.2	3303.51	7845.87	10100.8	11852.7	387.554	2476.96	1514.96	4438.99	1723.81	2746.08	3041.49	2219.35	1276.13	1338.48	4532.22	6492.46	160.508	6808.34	3903	475.471	3776.16	2890.21	4211.67	1093.59	1288.3	482.201	7739.09	11316.2	9003.31	8469.1	6514.6	5265.57	987.107	12354.7	6316.65	7027.82	1304.14	1981.68	1677.05	464.08	977.966	2114.86	1157.76
436	tr|A0A5C2H014|A0A5C2H014_HUMAN	IG c1278_light_IGKV1-5_IGKJ1 (Fragment) OS=Homo sapiens OX=9606 PE=2 SV=1	2268.81	6247.43	6150.79	7546.38	14200.4	13260.5	13864.6	14225	1393.63	8317.43	3738.99	3393.06	8704.68	7861.62	5353.52	5775.8	5262.94	1026.75	4029.67	2530.63	12135.4	2515.47	11304.2	6947.88	7150.13	6626.62	247.406	776.323	8008.77	4698.8	4989.03	250.605	9528.85	9875.99	2237.85	2594.65	7315.9	5635.98	5877.26	1530.71	2484.77	3739.74	1781.21	904.206	307.925	4110.84	946.827
437	tr|A0A7T0LP94|A0A7T0LP94_HUMAN	Immunglobulin heavy chain variable region (Fragment) OS=Homo sapiens OX=9606 PE=2 SV=1	533.793	1604.87	300.067	2646.64	1897.94	2988.91	4204.14	2850.62	2982.11	299.581	927.784	1512.63	3226.74	3532.2	252.687	486.621	3443.41	4111.91	3434.02	1227.03	1556.07	4736.53	3558.61	2855.14	1873.94	2663.59	2450.02	4239.44	252.839	1332.66	380.613	1356.92	4134.79	1916.99	4735.92	3719.61	5496.14	8873.42	3533.29	4006.13	793.623	1692.45	620.647	1045.52	1015.19	1870.91	817.375
438	tr|A0A7S5EVA2|A0A7S5EVA2_HUMAN	IGH c2025_heavy_IGHV3-15_IGHD3-22_IGHJ4 (Fragment) OS=Homo sapiens OX=9606 PE=2 SV=1	7735.05	4448.81	8265.08	7792.72	11574.2	12757.1	8131.52	6785.15	6935.18	6014.33	23270.8	23857.1	16542.4	14022.4	689.083	2172.77	1457.61	2629.08	4689.34	2899.95	7648.37	6006.16	14423.1	16766.1	19147	20811.8	9189.31	9388.11	12245.5	15900.6	19005.1	21065.1	24146.4	22962.8	7093.56	7921.29	5016.27	5538.8	3433.64	3568.2	2868.34	2281.65	2673.49	1374.53	2379.08	11514.9	14033.5
439	tr|A0A5C2GF65|A0A5C2GF65_HUMAN	IG c111_heavy_IGHV3-21_IGHD4-11_IGHJ4 (Fragment) OS=Homo sapiens OX=9606 PE=2 SV=1	2567.69	2927.52	37392.9	41330.4	8466.56	6995.4	4505.46	6277.09	3516.66	5308.72	1020.16	1075.97	2084.34	812.9	2907.14	379.466	174.762	331.515	1355.2	4191.6	1070.47	2543.53	6297.13	5019.37	4626.8	1220.66	781.65	729.592	917.218	345.221	6088.9	2577.87	5975.5	3662.47	5025.94	1854.14	1167.3	3549.76	7633.54	7628.14	4865.48	3842.04	3530.97	4821.44	3988.18	14421.2	12894.9
440	tr|A0A5C2GQ84|A0A5C2GQ84_HUMAN	IG c1556_heavy_IGHV3-48_IGHD6-19_IGHJ6 (Fragment) OS=Homo sapiens OX=9606 PE=2 SV=1	1269.28	546.178	2049.56	1440.1	1530.93	1988.44	889.623	1365.52	522.308	2718.39	596.719	2740.37	1108.74	1837.08	554.518	984.582	743.58	586.303	401.76	1108.41	1591.62	755.133	537.162	523.136	505.678	1589.39	1418.71	315.647	488.091	927.416	1121.33	2233.51	2110.46	995.909	9965.52	9282.1	1656.69	1134.82	576.442	1045.16	969.27	851.473	1050.98	904.685	815.049	1435.89	1393.84
441	tr|A0A5C2GQB1|A0A5C2GQB1_HUMAN	IG c1522_heavy_IGHV3-53_IGHD2-21_IGHJ4 (Fragment) OS=Homo sapiens OX=9606 PE=2 SV=1	4775.59	6082.91	3053.7	5803.47	2775.29	2813.01	2779.65	14435.2	4083.21	3449.58	13763.2	2604.32	4277.68	14559	2095.65	10346.5	3714.02	1297.51	2019.67	11811.5	2463.05	2617.55	2899	8237.91	15816.1	16621.1	2225.65	9427.38	1713.84	1240.34	2102.44	1997.85	2983.98	3618.31	278.053	1313.61	12302.5	11093.3	1453.39	1855.75	8512.78	816.163	981.083	498.906	485.367	2920.06	2450.5
442	tr|A0A5C2GY12|A0A5C2GY12_HUMAN	IG c538_light_IGLV6-57_IGLJ3 (Fragment) OS=Homo sapiens OX=9606 PE=2 SV=1	481.426	161.939	399.886	700.471	1274.41	564.639	648.583	578.396	1886.69	2681.83	421.658	690.169	604.877	232.434	548.16	317.186	466.497	399.545	1487.29	1657.67	1599.98	1630.33	1315.57	375.052	907.669	586.091	616.562	1106.36	261.294	394.887	320.183	257.108	589.892	221.89	9607.73	9147.81	2188.13	569.782	873.36	3303.87	324.407	420.011	610.84	233.561	309.873	858.098	1968.94
443	tr|A0A5C2G410|A0A5C2G410_HUMAN	IGL c4031_light_IGKV3-15_IGKJ1 (Fragment) OS=Homo sapiens OX=9606 PE=2 SV=1	3360.27	3928.49	6181.56	18013	1412.85	26952.3	34876.2	43390.5	36552.7	38200	565.796	1274.83	909.43	639.953	6017.56	516.358	316.795	1919.62	620.327	26838.5	1480.76	847.49	183.936	703.501	173.719	1743.76	402.575	3133.87	1315	1189	969.533	2233.66	22075.1	1559.26	2541.68	661.791	14589.2	16630	17235.3	517.734	1906.15	235.432	739.022	642.009	191.455	30782.6	33770.4
444	tr|A0A5C2GR69|A0A5C2GR69_HUMAN	IG c1214_heavy_IGHV3-33_IGHD6-13_IGHJ5 (Fragment) OS=Homo sapiens OX=9606 PE=2 SV=1	2044.55	1691.46	787.867	144.372	32597.5	32677.3	3729.6	2961.33	3425.16	2876.08	1492.12	2872.6	1713.6	1180.46	322.602	558.797	1110.15	498.564	1234.66	1379.57	4915.43	4533.93	1377.97	1890.79	3494.53	5922.46	1163.98	1528.23	971.401	932.365	3150.66	5708.6	1258.88	4093.68	1949.23	3168.5	1643.61	3497.29	2510.88	2408.99	523.791	244.189	825.549	257.767	1044.91	1658.5	2494.6
445	tr|A0A5C2FUQ0|A0A5C2FUQ0_HUMAN	IGL c748_light_IGKV4-1_IGKJ1 (Fragment) OS=Homo sapiens OX=9606 PE=2 SV=1	82.2756	633.078	379.314	1113.59	1383.14	593.425	327.229	494.765	2861.01	1943.82	252.134	2777.14	639.434	210.796	583.684	236.699	1010	1038.48	704.963	255.864	594.695	668.835	342.668	289.34	642.575	442.925	334.044	782.621	412.113	155.356	785.252	1636.96	1386.16	1537.94	402.203	390.55	3048.17	1976.8	782.069	600.092	200.406	238.395	342.389	550.041	509.647	11737.3	11752.4
446	tr|A0A5C2GW60|A0A5C2GW60_HUMAN	IG c1795_light_IGKV3-15_IGKJ4 (Fragment) OS=Homo sapiens OX=9606 PE=2 SV=1	804.718	1043.64	3580.37	3113.24	489.571	729.971	9027.01	5487.56	3067.66	714.256	8638.85	6452.96	7117.84	1795.83	5965.44	5505.59	5661.42	5010.83	4151.22	5000.43	1716.98	804.202	3447.47	5204.6	584.159	5328.66	2715.63	1663.27	3426.29	961.135	1723.71	1876.7	1679.51	14623.4	317.494	1815.73	4494.72	780.146	7063.78	4486.82	4574.45	2374.25	2042.86	1734.11	1698.29	7607.66	2832.8
447	tr|Q8WW79|Q8WW79_HUMAN	L-selectin OS=Homo sapiens OX=9606 GN=SELL PE=2 SV=1	4052.34	3733.7	2969.38	3852.59	4870.32	4288.83	3660.43	5647.41	3526.14	2446.75	4509.1	307.576	670.569	4733.83	2118.66	2845.75	362.794	1055.94	5622.94	6307.44	4685.63	4932.45	5766.18	5124.46	5081.52	5201.22	3551.82	3825.13	4555.43	5728.31	6247.55	7701.64	6028.91	6323.56	4631.35	2987.66	8991.71	8008.76	3960.7	4050.84	5090.08	3763.49	4082.75	3879.09	4475.76	5406.86	3186.25
448	tr|A0A5C2GJ51|A0A5C2GJ51_HUMAN	IG c360_light_IGKV3-20_IGKJ2 (Fragment) OS=Homo sapiens OX=9606 PE=2 SV=1	8374.43	3954.71	20664	3051.65	10306.1	6842.46	18569.4	7863.89	6522.45	15454.4	27716.2	7895.55	45312.4	745.634	1587.25	2787.63	4922.77	2374.99	4493.89	19344.1	42891.6	3836.28	8543.89	3991.8	1175.59	6321.4	12619.9	11141	22522.8	6619.35	10406.2	7386.79	6537.21	6989.64	6212.75	4897.46	9645.54	10644.1	8037.06	13158.2	9683.87	8783.36	24732.9	958.895	17306	14747.8	13435.9
449	tr|A6XMH4|A6XMH4_HUMAN	Beta-2-microglobulin OS=Homo sapiens OX=9606 PE=2 SV=1	17823.7	16762.6	10270.9	11807.1	31836.3	28014.5	35065.1	33578.2	7391.99	6302.53	41542.5	43735.1	13804.6	12708.6	8316.44	7713.37	10764.7	9885.55	22285.9	11389.8	11464.9	9960.5	16498.2	16131.9	12237	14706.9	11926.1	14553.8	28563	27319.3	31392.1	30740.7	17823.4	18370.6	59302	50577.4	30346.7	27473.5	10727.2	11727.1	8417.1	3407.49	9454.88	8818.32	9117.2	13132.8	11421.8
450	tr|Q9NZS6|Q9NZS6_HUMAN	Elongation factor 1-alpha (Fragment) OS=Homo sapiens OX=9606 PE=2 SV=1	256.053	286.15	251.914	379.225	152.491	231.682	625.42	139.446	426.517	201.679	0	184.427	600.107	337.907	0	0	272.292	251.354	0	254.721	285.195	404.453	462.145	219.824	409.806	461.936	165.814	359.552	236.12	305.356	1267.37	151.46	102.322	83.7958	92.7476	295.41	406.101	1830.43	391.58	920.372	115.853	109.531	193.862	216.65	135.903	1005.23	185.067
451	tr|C9JXI5|C9JXI5_HUMAN	Transmembrane protein 198 (Fragment) OS=Homo sapiens OX=9606 GN=TMEM198 PE=1 SV=1	3.25532e+06	3.10532e+06	1.23498e+06	1.31047e+06	4.29603e+06	4.13455e+06	2.8486e+06	2.84431e+06	3.41918e+06	3.46859e+06	7.2424e+06	7.17325e+06	4.36485e+06	4.5222e+06	1.42511e+07	1.62865e+07	9.62291e+06	9.96338e+06	2.97453e+06	2.95313e+06	1.02106e+07	1.13243e+07	8.44818e+06	8.78761e+06	5.5209e+06	5.07494e+06	2.01994e+07	1.95384e+07	1.48028e+07	1.46221e+07	9.75392e+06	9.61581e+06	8.0989e+06	7.76051e+06	1.15831e+07	1.06856e+07	8.11301e+06	6.55392e+06	1.17233e+07	26027.9	2.1521e+06	2.11734e+06	2.23625e+06	2.28804e+06	12347.6	1.81826e+06	1.8728e+06
452	tr|A0A5C2GNZ0|A0A5C2GNZ0_HUMAN	IG c878_light_IGKV1-5_IGKJ2 (Fragment) OS=Homo sapiens OX=9606 PE=2 SV=1	161890	147574	184349	198909	391624	388955	351003	370047	141943	82345.7	207667	202271	127594	141785	133714	147102	76736.6	80734.4	227775	216728	191738	198526	197885	196672	214518	214557	145423	165389	97744.2	88621.4	168564	183279	292478	289445	156169	179836	339566	281951	206151	226115	81639.9	80105.9	80775.5	81792.3	79117.5	170685	155223
453	tr|A0A0K0K1J1|A0A0K0K1J1_HUMAN	Epididymis secretory protein Li 2 OS=Homo sapiens OX=9606 GN=HEL-S-2 PE=2 SV=1	2902.14	1822.78	4741.63	4518.27	13045.3	12320.9	8067.41	4201	756.592	321.38	9683.05	10299.6	3937.43	2581.73	783.275	2356.65	2188.71	2674.82	4274.56	2359.54	6387.75	8084.69	393.351	3505.69	6865.52	2185.23	213.999	4495.43	7487.94	6730.63	11139.7	11580.5	5646.42	6425.43	15498.9	13602.2	3431.24	7474.76	3083.98	4402.82	4212.28	2532.36	3540.84	2733.07	3717.71	4888.09	2212.89
454	tr|B4E1B2|B4E1B2_HUMAN	Beta-1 metal-binding globulin OS=Homo sapiens OX=9606 PE=2 SV=1	329581	275655	217696	240288	1527.06	1348.89	299095	312579	387017	575495	992.874	1044.97	457.395	344.202	377.08	1388.73	736.785	422.344	303.558	596.905	545.206	124.535	652.714	346.955	1504.78	272.54	625.576	771.238	4270.34	3790.1	2162.88	1053.8	315837	279203	167627	165049	455.501	598.087	554.352	1708.66	170.848	2211.2	1028.83	1631.99	353.898	1297.47	1736.84
455	tr|B7ZKJ8|B7ZKJ8_HUMAN	ITIH4 protein OS=Homo sapiens OX=9606 GN=ITIH4 PE=1 SV=1	2157.86	3055.98	4914.89	1536.14	1947.58	1401.32	5084.88	1335.83	4593.26	485.181	274.631	550.309	5776.65	1178.51	2565.26	850.585	717.079	264.434	2640.9	821.347	165.322	2247.14	1346.33	1700.09	4650.78	1560.61	2908.5	4034.76	3245.91	1081.18	2046.61	3459.93	2534.96	2912.1	1945.31	1903.64	2275.84	3536.61	3035.93	4263.75	1836.98	7412.73	6267.11	373.3	7771.82	7453.95	8867.57
456	tr|A0A1U9X7H7|A0A1U9X7H7_HUMAN	C3/C5 convertase OS=Homo sapiens OX=9606 PE=4 SV=1	569.742	887.956	490.909	878.925	553.858	1088.54	691.225	1991.68	464.823	627.108	7468.19	11117	371.085	398.191	701.542	527.186	21225.6	21274.8	1101.63	534.936	1797.95	908.911	572.475	883.694	17008.3	17915.4	408.574	511.53	213.8	372.062	1643.21	961.732	1159.66	104.902	40272.8	37422	1187.11	350.916	1274.51	1981.94	246.067	216.011	306.289	498.436	461.547	742.191	697.964
457	tr|A8K8Z4|A8K8Z4_HUMAN	Complement component C6 OS=Homo sapiens OX=9606 PE=2 SV=1	4818.27	8020.18	3080.58	5778.66	4362.93	4359.26	4286.02	3046.55	6494.26	9304.71	7682.13	5100.05	9530.63	4228.73	4604.19	3337.87	6325.48	4855.84	9563.18	6709.64	5102.17	6440.32	5694.77	3065.68	1479.61	4521.62	11361.5	8815.48	5835.34	8772.28	7611.52	576.429	7710.92	7685.35	811.913	2118.79	4818.65	7948.91	9587.57	9904.98	7428.52	4911.14	7431.65	8964.65	6829.29	5943.95	615.907
458	tr|Q86TT1|Q86TT1_HUMAN	Full-length cDNA clone CS0DD006YL02 of Neuroblastoma of Homo sapiens (human) OS=Homo sapiens OX=9606 PE=2 SV=1	52105.9	48896.1	349660	380920	413557	368484	114553	115966	67014.7	72859	107883	108495	268685	296058	114442	114065	36177.7	40628.7	119205	124528	95344.8	94737.8	276074	282004	216023	234262	260967	249157	47140.6	47800.4	85987.3	84739.9	247592	259041	212004	187269	47786	46222	158890	170990	195384	197062	193904	199686	201607	145329	139413
459	tr|Q13784|Q13784_HUMAN	APOA4 protein (Fragment) OS=Homo sapiens OX=9606 GN=APOA4 PE=2 SV=1	4101.92	2694.65	5492.58	4652.97	3122.89	10994.9	9059.97	5459.19	6878.09	5258.07	19605.8	20233.1	30167.4	11333.2	28783.4	17439	28438.4	110400	3829.88	4174.48	12086.9	21206.9	9146.92	2279.43	6345.82	6684.51	10301.1	10106.4	1437.12	2925.38	1126.66	6769.55	9106.82	6756.56	7028.73	10336.4	6560.14	6305.74	2835.82	84.261	7785.56	4700.5	3821.85	133.728	85.2778	5118.13	252.414
460	tr|B0ZBE2|B0ZBE2_HUMAN	Angiotensin 1-10 OS=Homo sapiens OX=9606 GN=AGT PE=2 SV=1	1342.39	1478.06	6759.99	4069.97	10241.7	3660.48	8752.47	12374.4	212.538	1285.01	4931.95	6113.55	9290.17	7181.78	9150.67	4156.6	1902.62	333.658	958.273	1847.95	1157.72	1298.63	363.842	252.472	8110.46	10169.3	9005.27	6808.69	555.425	13972.7	9478.66	7263.08	5848.54	5954.64	1375.93	795.26	4388.6	1326.6	7780.85	7617.98	349.982	5322.14	4933.94	825.25	5519.35	6569.2	4135.87
461	tr|Q6IN99|Q6IN99_HUMAN	IGL@ protein OS=Homo sapiens OX=9606 GN=IGL@ PE=2 SV=1	202.796	1224.72	4813.79	4589.65	680.954	537.827	21257.7	2512.35	7470.04	8651.62	3554.14	5002.35	2918.44	645.572	5150.98	1310.48	1313.33	1858.88	9694.66	9858.7	4225.71	8491.57	9608.26	719.243	5647.12	4443.54	8664.82	6880.65	2929.81	2241.3	207.609	686.649	12333.2	8035.85	186.014	796.21	5542.32	2144.35	380.626	39.1152	115.575	2202.2	1124.34	81.963	121.123	8747.24	4868.51
462	sp|P02750|A2GL_HUMAN	Leucine-rich alpha-2-glycoprotein OS=Homo sapiens OX=9606 GN=LRG1 PE=1 SV=2	32029	35057.2	32823.8	22412.1	51820.6	51355.5	80516.2	77554.1	23544.1	28018.4	29073	13503.2	39588	25222.7	5636.33	4413.25	5979.89	7790.88	39870.7	44076.1	25095.2	23776.6	19347.1	19062.7	45504.6	69199.6	31140.5	30706.4	77391	67767.9	21020.6	19873.5	11998.5	13275.3	62186	58555.3	23491.3	21041.3	62907	76912.9	78793.1	76513.6	67522.5	62988.7	69851.9	137422	121399
463	tr|A0A7S5BY99|A0A7S5BY99_HUMAN	IGH c456_heavy_IGHV3-7_IGHD5-12_IGHJ6 (Fragment) OS=Homo sapiens OX=9606 PE=2 SV=1	790.859	812.297	1630.95	1377.83	1368.89	194.172	2796.41	2640.36	727.394	981.566	1465.46	2273.04	2656	1165.48	793.338	1270.41	1529.65	1324.08	740.651	545.6	787.708	557.617	664.872	390.046	779.915	437.072	482.053	1758.03	576.91	1802.92	461.233	4933.08	3190.82	4451.95	1054.27	1041.47	1833.33	3245.57	1068.77	2487.56	473.305	152.048	1404.56	702.187	325.528	4248.48	4578.28
464	tr|A0A5C2GNV9|A0A5C2GNV9_HUMAN	IG c354_heavy_IGHV5-51_IGHD6-19_IGHJ5 (Fragment) OS=Homo sapiens OX=9606 PE=2 SV=1	720.982	363.573	5232.77	535.162	854.837	1519.15	736.763	1416.6	7024.26	2505.62	719.631	512.099	1951.88	685.601	895.954	1271.63	455.475	204.37	994.91	748.63	1591.44	526.145	557.525	150.55	3589.47	3167.22	409.094	887.904	1077.95	202.036	63.5578	529.464	131.987	518.392	685.216	209.37	1790.15	1097.57	6699.09	1586.63	421.144	662.884	117.573	112.744	306.719	2336.73	3638.81
465	tr|A0A4P8J6J1|A0A4P8J6J1_HUMAN	IgG4_IGHV5-51 (Fragment) OS=Homo sapiens OX=9606 PE=2 SV=1	10006.9	1417.34	1079.5	151.328	3036.14	4754.44	1115.79	3469.63	2457.46	1561.42	3129.19	2240.3	1170.43	3223.03	386.073	205.345	809.965	233.131	2184.05	1196.9	327.478	241.53	2878.47	2412.57	735.785	1195.13	157.909	1484.48	2282.96	958.418	931.108	1241.91	2628.45	3132.3	1585.15	1213.93	225.577	5250.01	2985.48	1463.22	1317.02	3490.78	707.443	217.289	144.897	1549.14	2838.89
466	tr|A0A7S5C5I4|A0A7S5C5I4_HUMAN	IGH c4062_heavy_IGHV3-33_IGHD3-22_IGHJ4 (Fragment) OS=Homo sapiens OX=9606 PE=2 SV=1	2403.2	2317.73	3707.26	6052.77	4025.26	702.634	3695.79	503.158	3505.03	2082.3	288.287	561.538	2478.72	3027.63	909.262	336.119	402.109	660.114	1935.89	3048.19	1189.49	546.499	1137.78	4193.2	5389.85	6145.93	2285.21	2577.88	1840.13	968.132	652.333	2721.19	2606.99	1505.39	613.117	238.3	3459.02	4448.1	1886.7	880.933	3739.14	3373.22	3034.73	3252.56	3469.27	14592.7	16426.4
467	tr|A0A5C2GVC0|A0A5C2GVC0_HUMAN	IG c802_light_IGKV3-20_IGKJ5 (Fragment) OS=Homo sapiens OX=9606 PE=2 SV=1	6629.27	6339.48	8376.4	8888.45	5087.24	6099.37	5323.43	4996.45	13151.8	8880.72	4337.07	1708.68	4533.44	2437.33	317.951	1314.13	1303.8	185.149	7774.25	6552.59	1218.49	1214.5	2992.68	1277.04	3114.34	2232.42	1693.52	3491.76	906.385	1018.49	1530.04	1057.08	3991.4	7465.63	1927.55	5451.85	3795.29	5209.68	4706.76	4562.14	158.292	392.916	3214.1	2979.01	5258.47	66217.6	57030.6
468	tr|A0A5C2GPL4|A0A5C2GPL4_HUMAN	IG c520_heavy_IGHV4-34_IGHD3-16_IGHJ4 (Fragment) OS=Homo sapiens OX=9606 PE=2 SV=1	26830.4	26421.5	7767.16	9841.52	8884.84	18455.4	26062.3	28164.7	22101.8	10858.5	8569.56	6361.9	14325.4	13144.5	2348.91	1778.46	1434.46	4620.82	10490.1	13589.9	15904.6	11791.7	7735.66	9121.75	18719.8	9904.21	13584.6	16815.5	4566.28	5391.71	15020.1	16377.4	17299.4	19828.4	11802.5	13312.1	22037.5	8939.13	16005.3	8775.59	7566.4	2988.06	453.998	3411.61	671.116	19006.6	17310.9
469	tr|A0A7T0LNQ4|A0A7T0LNQ4_HUMAN	Immunglobulin heavy chain variable region (Fragment) OS=Homo sapiens OX=9606 PE=2 SV=1	1179.77	1808.16	3102.08	2730.87	748.718	973.814	2350.34	2516.48	1831.1	939.958	1177.01	798.472	1518.72	2485.51	1728.21	768.242	1118.9	1831.16	4675.48	2502.31	8002.63	5950.94	2520.3	2348.85	3759.33	4265.59	1109.07	1430.17	2844.26	2837.99	3325.73	3039.38	5958.88	4677.96	1228.37	667.811	708.897	132.479	9971.79	10105.4	512.154	1370.5	1751.92	333.603	183.947	911.793	1433.13
470	tr|A0A5C2GJK9|A0A5C2GJK9_HUMAN	IG c95_heavy_IGHV3-23_IGHD6-25_IGHJ4 (Fragment) OS=Homo sapiens OX=9606 PE=2 SV=1	3756.86	977.115	1524.69	697.847	3158.61	269.429	944.735	305.79	8786.86	3206.5	1899.9	4005.64	1853.51	309.219	12858.4	12809.8	483.912	496.876	2774.48	7341.01	1236.95	1450.83	2215.36	8243.13	6926.24	6031.68	577.65	161.691	554.529	1386.68	580.02	577.332	6986.46	199.564	19756.1	12473.5	3979.66	3833.91	3021.12	865.763	1392.41	505.725	1366.98	1201.11	1123.25	249.136	1714.87
471	tr|A0A7S5C6Y2|A0A7S5C6Y2_HUMAN	IGH c3385_heavy_IGHV5-51_IGHD5-24_IGHJ2 (Fragment) OS=Homo sapiens OX=9606 PE=2 SV=1	1775.52	2025.19	1954.16	3229.88	4111.47	2670.54	1665.46	1084.34	2183.22	1477.92	819.108	914.358	2336.02	422.568	425.903	533.668	1844.73	367.617	1122.44	1163.44	1299.4	1374.28	970.143	1228.22	2366.11	824.476	1048.38	1776.67	1198.83	585.264	2515.25	3233.04	1546.36	1499.58	557.388	709.436	2271.06	704.65	2919.72	1862.89	1203.2	924.618	1401.55	1451.66	581.826	1215.24	1964.79
472	tr|A0A5C2GL81|A0A5C2GL81_HUMAN	IG c325_heavy_IGHV5-51_IGHD5-24_IGHJ4 (Fragment) OS=Homo sapiens OX=9606 PE=2 SV=1	3887.97	14547.7	4742.81	5242.11	113.681	4308.92	14565.4	9319.25	2794.34	1525.78	4569.03	11011.3	5220.59	8497.55	5217.63	5571.12	2534.99	751.646	4767.45	6523.46	6784.92	5838.12	6557.95	2717.73	4819.24	3135.07	4028.84	4509.94	3352.75	3413.79	468.189	4737.46	12442.8	12900.3	2515.54	1741.84	11574.5	14392.8	6309.28	3895.55	2283.8	3210.18	2525.62	148.508	0	370.225	6874.15
473	tr|A0A7S5BZG2|A0A7S5BZG2_HUMAN	IGH c1146_heavy_IGHV3-33_IGHD3-10_IGHJ4 (Fragment) OS=Homo sapiens OX=9606 PE=2 SV=1	1143.62	519.059	273.889	654.266	461.963	1896.64	1367.55	2416.65	774.683	1780.42	400.151	193.068	1307.67	131.299	216.536	437.634	376.755	617.897	462.078	714.818	4315.44	5013.57	1050.14	471.616	353.124	289.084	1477.3	494.686	698.278	276.691	3165.26	1307.68	1339.15	2843.2	1633.49	1006.42	3273	2195.4	851.216	450.768	277.863	267.088	222.837	345.957	383.777	3673.59	7221.33
474	tr|A0A5C2GX92|A0A5C2GX92_HUMAN	IG c1207_heavy_IGHV3-23_IGHD1-26_IGHJ1 (Fragment) OS=Homo sapiens OX=9606 PE=2 SV=1	2726.93	2198.27	4901.18	2461.74	4128.72	3626.24	9433.97	11095.1	4957.27	3522.29	5430.43	6614.94	5482.22	4370.73	850.02	1345.73	1208.58	1184.99	5463.8	4371.71	2416.12	4297.6	7741.69	6569.77	5738.31	8695.47	4206.97	6030.43	5438.03	1984.66	6807.88	7748.44	4110.37	4860.05	5953.49	2951.08	4174.55	3491.85	16110.5	16910.2	1685.37	1623.35	778.125	653.235	1774.63	5710.04	5658.48
475	tr|A0A5C2GR31|A0A5C2GR31_HUMAN	IG c349_heavy_IGHV5-51_IGHD3-10_IGHJ6 (Fragment) OS=Homo sapiens OX=9606 PE=2 SV=1	664.35	561.764	91.9145	640.599	212.743	1435.16	1415.05	1576.76	558.124	429.212	542.056	224.435	1038.42	1634.19	1141.68	1363.63	341.91	1148.41	647.475	220.982	1706.19	1316.29	465.467	721.831	365.058	702.13	1698.74	3054.24	1650.16	1354.22	1096.32	1354.9	302.571	984.751	1231.94	817.617	718.831	800.658	1088.9	876.717	815.715	495.803	382.946	314.041	421.537	1169.86	3072.74
476	tr|A0A7S5C435|A0A7S5C435_HUMAN	IGH c3487_heavy_IGHV3-11_IGHD5-12_IGHJ6 (Fragment) OS=Homo sapiens OX=9606 PE=2 SV=1	9323.19	9645.67	1539.03	206.622	3128.82	3570.25	5887.94	3405.03	580.957	6440.95	3499.37	1852.5	2063.05	2880.84	2320.96	1256.65	1674.17	1423.2	613.619	2705.1	2826.52	2349.62	4657.19	4973.7	2871.75	2162.97	1666.91	5704.27	2916.96	2373.75	6770.18	4377.06	3977.85	3224	1867.86	1190.52	4576.56	4203.37	1597.41	3297.84	1553.66	2636.46	1450.21	1071.92	1048.41	2119.33	3839.42
477	tr|A0A7S5EVG5|A0A7S5EVG5_HUMAN	IGH c3526_heavy_IGHV3-74_IGHD2-21_IGHJ4 (Fragment) OS=Homo sapiens OX=9606 PE=2 SV=1	4122.92	4145.03	32489.2	31354.9	8883.22	12990.7	7098.01	10543.8	18102.2	15297.8	558.292	13530	17960.8	16599.2	7980.63	8188.98	3530.92	8427.8	4216.38	6235.86	5127.47	5166.42	6493.97	6540.32	7471.23	7208	4443.75	6691.59	3775.72	1015.46	29103.7	31345	11641.9	11334.4	2596.79	5474.77	6975.31	4934.62	9527.39	9804.33	12054	145.653	1781.81	553.935	1823.36	824.833	11007.8
478	tr|A0A5C2G080|A0A5C2G080_HUMAN	IGL c1940_light_IGKV3-20_IGKJ5 (Fragment) OS=Homo sapiens OX=9606 PE=2 SV=1	3908.25	3012.27	4620.77	6909.52	2236.31	695.493	2373.74	1657.37	182.709	1289.15	10383.5	11419.3	1165.35	749.739	1063.92	355.139	394.338	1143.9	5545.38	5928.4	882.387	2356.58	928.396	1204.53	3369.93	2482.24	1253.73	1094.29	3156.77	2059.91	3393.59	1241.41	36846.6	30045.3	1193.38	2126.75	1847.11	2685.72	1354.49	1236.71	3867.37	3195.61	3439.68	3724.5	4600.8	5442.19	378.111
479	tr|A0A5C2GDW3|A0A5C2GDW3_HUMAN	IGH + IGL c109_heavy_IGHV3-11_IGHD3-10_IGHJ4 (Fragment) OS=Homo sapiens OX=9606 PE=2 SV=1	99.4561	122.988	190.833	1836.09	308.607	883.846	1647.19	2087.87	1762.23	1519.11	562.289	1065.22	435.333	669.232	564.488	523.463	126.525	548.355	1302.31	1258.31	2257.3	2205.75	276.124	776.407	890.417	1394.66	590.242	1495.32	295.539	865.491	3081.97	4567.46	2167.72	1462.69	113.508	153.474	12261.1	9373.64	4413.59	6459.94	1515.88	1379.19	357.418	1074.83	2048.22	2772.76	3001.39
480	tr|A0A5C2G1S6|A0A5C2G1S6_HUMAN	IGL c2864_light_IGKV3-20_IGKJ4 (Fragment) OS=Homo sapiens OX=9606 PE=2 SV=1	6981.78	5470.85	4651.06	5548.08	12145.7	13570.6	11603.8	7850.37	9264.78	5313.79	9474.76	6679.18	1580.23	5420.99	448.642	3130.88	2518.02	2981.67	8275.42	8886.54	7158.9	180.465	6649.16	2814.64	7283.12	9387.99	7412.28	9348.28	4689.94	3027.81	8676.21	10111.7	11298	8765.97	4256.96	3399.23	10824.2	537.775	6570.87	7246.24	7361.96	2015.09	6225.73	7023.61	2035.59	14557.8	8734.78
481	tr|A0A5C2GUV5|A0A5C2GUV5_HUMAN	IG c297_heavy_IGHV3-33_IGHD3-16_IGHJ6 (Fragment) OS=Homo sapiens OX=9606 PE=2 SV=1	8430.18	9126.36	653.965	1046.52	9184.07	10973.9	14921.8	14201.2	8555.92	12355	1173.74	1497.29	411.542	1231.8	492.512	557.354	174.883	123.033	1715.88	5134.82	8623.1	6640.37	4229.51	3352.16	1260.01	2325.01	2114.79	1745.86	127.71	2689.19	3274.43	2371.46	6112.43	3812.58	773.426	1055.77	10070.4	7688.34	149.884	1863.69	426.232	141.124	177.588	278.218	258.016	741.515	2099.16
482	tr|A0A5C2GUE5|A0A5C2GUE5_HUMAN	IG c1144_light_IGKV1-5_IGKJ4 (Fragment) OS=Homo sapiens OX=9606 PE=2 SV=1	1314.06	474.391	2531.75	623.103	808.228	3247.9	6963.82	9390.59	2788.48	2567.42	2144.72	795.813	2886.77	3047.09	505.046	1224.92	642.739	1402.5	1104.42	5367.49	453.981	314.706	3047.72	301.634	591.394	850.132	345.966	3270.87	210.854	484.676	1840.22	700.999	4942.42	5397.4	1901.65	2873.3	4666.76	2818.16	257.917	2532.71	302.256	804.472	203.863	652.835	176.441	1009.01	1212.97
483	tr|A0A7S5C1K5|A0A7S5C1K5_HUMAN	IGH c2513_heavy_IGHV1-69_IGHD5-12_IGHJ2 (Fragment) OS=Homo sapiens OX=9606 PE=2 SV=1	589.872	2378.34	1283.87	1148.93	7947.61	8562.79	2464.42	2466.54	478.802	1229.02	1880.99	525.943	1416.97	946.678	390.529	963.963	953.079	350.935	1087.36	1261.11	338.773	1252.6	2769.3	1791.47	257.068	832.81	633.58	1133.8	540.281	428.346	2673.49	2587.95	1886.39	2006.83	593.006	1022.82	2438.98	261.011	1534.05	241.658	348.954	575.793	1102.07	144.556	237.395	16210.9	18003.7
484	tr|A0A5C2GXR5|A0A5C2GXR5_HUMAN	IG c500_light_IGKV2-28_IGKJ1 (Fragment) OS=Homo sapiens OX=9606 PE=2 SV=1	1590.08	1725.75	1216.32	324.647	2966.15	1737.45	4392.68	2929.5	1915.19	431.479	1370.41	695.533	2338.06	561.672	2166.44	1081.81	1321.22	1045.29	2322.84	1594.93	1052.27	2066.57	478.901	3050.16	1902.48	3615.18	4590.82	357.812	785.477	423.914	3608.82	3682.82	3892.39	1277.84	422.896	971.514	4707.83	4167.62	585.33	4145.63	1071.63	776.219	525.659	1287.83	204.707	1396.31	453.568
485	tr|A0A5C2G1U7|A0A5C2G1U7_HUMAN	IGL c3139_light_IGKV1-5_IGKJ4 (Fragment) OS=Homo sapiens OX=9606 PE=2 SV=1	1376.68	341.992	1162.74	931.617	1764.24	771.757	7555.44	387.483	779.834	1397.52	723.773	837.237	244.075	979.383	387.808	231.426	855.154	1647.65	1351.38	1312.3	944.796	551.743	269.693	602.083	583.134	1611.07	1141.07	1257.59	606.375	615.738	725.43	615.415	413.156	178.945	496.133	2363.39	1547.42	2332.09	925.38	983.322	394.932	211.085	364.066	421.417	613.751	1072.14	3388.17
486	tr|A0A5C2G586|A0A5C2G586_HUMAN	IGH c149_heavy__IGHV3-20_IGHD3-10_IGHJ6 (Fragment) OS=Homo sapiens OX=9606 PE=2 SV=1	629.228	471.849	504.749	191.162	461.696	522.699	812.6	8663.32	431.186	7323.48	7624.44	359.256	3820.68	491.719	3718.53	573.426	174.921	2913.44	922.875	1724.36	79.6971	1609.14	273.93	228.591	167.764	392.857	796.9	964.98	238.259	193.811	598.022	893.506	1045.07	519.039	589.278	509.02	517.562	441.102	837.355	245.963	253.528	3802.02	2986.84	98.8228	228.65	11028.9	1117.8
487	tr|A0A5C2GYP7|A0A5C2GYP7_HUMAN	IG c768_light_IGKV1-9_IGKJ4 (Fragment) OS=Homo sapiens OX=9606 PE=2 SV=1	1722	1199.25	165.082	2196.52	437.884	2341.77	2746.98	2615.35	1418.97	1420.47	1948.12	2243.02	3995.19	3307.91	1146.38	638.077	610.425	477.648	2760.64	3804.84	2790.68	1768.95	1268.24	164.798	2281.83	2111.77	1451.7	210.748	2532.42	685.534	3939.46	3085.61	2827.8	2533.55	870.416	710.934	758.476	2706.17	2145.16	1743.17	358.281	488.562	237.788	686.608	122.361	304.937	647.345
488	tr|A0A7S5EUP5|A0A7S5EUP5_HUMAN	IGH c2491_heavy_IGHV3-23_IGHD5-12_IGHJ3 (Fragment) OS=Homo sapiens OX=9606 PE=2 SV=1	4875.66	5740.03	5687.11	8224.29	1885.27	5498.63	5980.79	8502.23	265.41	7559.66	7884.56	6123.02	6539.92	2814.27	3381.6	1042.46	1587.86	1100.77	7857.06	12933.2	3946.87	4943.79	4196.03	3034.22	7991.21	11048.8	4995.22	4866.43	7853.35	3700.62	2241.94	3932.38	1210.41	4484.45	7854.24	7870.77	4512.54	7198.06	6086.89	12118.5	795.248	902.385	1946.52	394.192	1965.7	2562.91	2199.7
489	tr|A0A5C2GZ35|A0A5C2GZ35_HUMAN	IG c918_light_IGKV1-27_IGKJ1 (Fragment) OS=Homo sapiens OX=9606 PE=2 SV=1	4274.55	444.007	9954.67	6572.62	4349.89	3418.9	18142.3	21553.1	18782.9	7603.45	4814.63	3589.84	503.864	16427.5	802.308	6976.96	6953.3	5858.8	8814.62	11156	189.417	22792.6	6083.85	863.666	7224.56	333.257	8589.35	11435.3	273.86	13274.4	7377.09	20564	14108.3	12953.7	5256.93	178.039	12077.6	13636	12895.2	15361.4	1121.66	2801.7	1982.79	2587.15	9257.11	45664.3	33624.4
490	tr|A0A5C2G403|A0A5C2G403_HUMAN	IGL c2187_light_IGKV4-1_IGKJ2 (Fragment) OS=Homo sapiens OX=9606 PE=2 SV=1	10126.7	9911.34	786.481	1728.18	2300.22	137.318	16051.6	13077	3567.86	4912.24	4097.31	1800.88	8283.36	22766.2	5959.11	6506.23	5341.2	819.559	5055.18	28841.7	63543	6418.08	3116.52	4186.11	53154.1	21858.3	1208.14	369.57	8849.21	161.543	6003.06	4740.58	5077.15	3449.48	1310.71	1987.27	1567.68	4904.54	8019.08	6731.64	214.294	3976.87	1059.76	2856.21	2650.68	4512.06	1565.83
491	tr|A0A5C2G2K2|A0A5C2G2K2_HUMAN	IGL c3382_light_IGKV1D-12_IGKJ4 (Fragment) OS=Homo sapiens OX=9606 PE=2 SV=1	488.422	276.033	454.297	369.415	1537.68	839.803	1358.45	773.717	357.48	441.428	571.824	604.358	1970.44	213.359	324.109	876.409	481.865	454.507	1418.19	605.406	896.476	188.669	738.796	257.356	168.559	436.237	884.195	1030.33	847.372	337.192	14397.7	15812.7	2167.39	533.902	1646.06	899.908	1509.37	1361.39	704.146	888.213	229.572	268.911	733.898	236.553	494.47	5961.2	6118.65
492	tr|A0A7S5C2Y8|A0A7S5C2Y8_HUMAN	IGH c2134_heavy_IGHV4-39_IGHD4-17_IGHJ1 (Fragment) OS=Homo sapiens OX=9606 PE=2 SV=1	173.958	15369.1	11895.7	1754.67	2060.16	3281.81	4638.1	31347.9	2268.85	3279.31	24625.2	24572.1	4338.16	1361.44	1758.52	1462.07	3964.48	1864.43	2321.25	2060.09	1865.09	465.089	3525.18	178.103	281.76	1803.74	2071.39	2468.24	2282.96	9953.75	12352.9	14435.2	5199.47	15799.7	926.143	9844.44	3405.66	12070.9	9552.55	206.788	6045.7	1084.12	6456.23	1469.03	8702.08	620.493	2513.45
493	tr|A0A5C2FZ75|A0A5C2FZ75_HUMAN	IGL c2328_light_IGLV2-11_IGLJ3 (Fragment) OS=Homo sapiens OX=9606 PE=2 SV=1	9157.64	9547.86	154.481	425.393	4562.28	3837.25	1158.9	1802.37	635.257	1649.54	1815.79	1473.9	740.499	692.012	10588.3	230.268	1094.33	1530.76	895.065	3632.79	559.638	3538.01	13305.6	1379.82	433.759	8546.94	5710.34	2440.06	4336.77	2745.8	479.062	7937.15	1330.06	1119.98	5808.35	89.4327	1279.56	960.949	673.253	6715.55	1068.51	1159.32	127.944	1629.73	1337.94	24246.1	23416.1
494	tr|A0A5C2G6E4|A0A5C2G6E4_HUMAN	IGL c1983_light_IGLV2-11_IGLJ1 (Fragment) OS=Homo sapiens OX=9606 PE=2 SV=1	2719.84	2575.52	1724.67	3266.62	3074.9	1351.4	3824.69	1514.77	741.116	3930.23	13942.8	678.646	687.939	1405.32	617.209	13771.8	2225.55	2781.13	8528.16	5090.01	1541.23	10424	3509.11	2856.29	883.276	251.062	587.909	4091.55	2107.57	3702.79	539.568	645.59	4527.8	86.2504	3684.38	393.572	4799.73	2424.36	1253.71	2053.67	1257.37	1140.56	981.665	1574.46	662.31	3449.19	467.836
495	tr|A0A5C2GF83|A0A5C2GF83_HUMAN	IG c622_heavy_IGHV3-21_IGHD2-21_IGHJ4 (Fragment) OS=Homo sapiens OX=9606 PE=2 SV=1	7454.04	8708.24	8468.62	9887.68	43519.8	40661.9	13334.5	11378.9	265.657	8021.57	10464.9	7195.93	5814.58	6090.32	8173.32	7232.78	2744.1	5080.04	13491.2	12781.7	7289.7	5935.52	9729.28	10424.6	7517.72	7219.5	6514.86	8419.85	5571.89	6255.89	8745.87	8929.1	7830.41	7671.35	4593.62	6549.17	16770.8	14993.6	10132.4	9824.56	1396.23	2732.85	1748.12	415.901	1716.58	10941.6	10696.8
496	tr|A0A5C2FY35|A0A5C2FY35_HUMAN	IGL c1802_light_IGKV1D-39_IGKJ1 (Fragment) OS=Homo sapiens OX=9606 PE=2 SV=1	7334.87	6993.41	336.046	1851.94	551.444	1536.38	6187.76	5204.99	1727.69	9137.92	5687.19	5243.05	2435.5	2360.43	7789.77	6106.13	3031.71	3358.07	6204.29	7705.29	199.442	7460.91	4632.02	985.216	7916.39	1183.74	3909.92	4363.67	3482.05	6273.66	375.534	4761.42	4506.34	1275.51	5866.65	6179.7	4508.93	5614.65	2899.44	1014.39	12127.6	8598.64	187.35	12907.9	12278.8	36798.6	27041.4
497	tr|A0A5C2GI95|A0A5C2GI95_HUMAN	IG c494_light_IGKV1-5_IGKJ2 (Fragment) OS=Homo sapiens OX=9606 PE=2 SV=1	51723.7	119993	164651	169883	350327	356444	317746	322888	119760	118620	171173	170594	114767	124826	118185	134479	64740.7	67587.4	191838	181834	160293	164513	53304.4	171204	189195	187705	123582	133612	85035.7	80341.3	145846	58720.1	246737	250808	131392	153222	277263	250971	177244	197773	69605.2	66601.4	69412.7	73186.4	68310.3	138912	126917
498	tr|A0A5C2GN95|A0A5C2GN95_HUMAN	IG c336_light_IGKV1D-39_IGKJ2 (Fragment) OS=Homo sapiens OX=9606 PE=2 SV=1	13438	12620.5	4070.96	3063.17	6701.81	1315.81	7972.34	3281.17	498.399	267.391	2638.75	249.95	2070.18	1054.53	3465.66	4743.48	648.622	333.376	1547.58	6826.41	1059.32	3716.15	4570.51	762.622	3654.57	4809.08	3732.48	2743.75	2521.92	415.636	5645.81	5745.26	6836.82	6134.27	5768.95	6885.17	14189.4	3367.66	7589.15	7136.37	1937.31	1532.89	803.368	1029.73	814.54	1524.92	2992.99
499	tr|A0A7T0LNV7|A0A7T0LNV7_HUMAN	Immunglobulin heavy chain variable region (Fragment) OS=Homo sapiens OX=9606 PE=2 SV=1	811.437	607.314	1342.96	1641.09	5910.92	376.241	10236.4	10344	3172.74	2719.9	3270.72	117375	385.613	4224.86	4110.37	4404.71	5738.08	4541.96	6249.98	3201.14	1204.24	1721.05	2725.79	1963.25	3218.43	3573.88	3214.64	1025.08	2274.01	1106.92	3471.16	1983.62	4214.36	4456.59	381.757	441.594	7927.63	6603.5	4638.65	5216.23	3383.21	436.858	25466.2	1499.83	17877.8	26804.5	598.272
500	tr|A0A5C2GHU7|A0A5C2GHU7_HUMAN	IG c214_light_IGKV1-33_IGKJ5 (Fragment) OS=Homo sapiens OX=9606 PE=2 SV=1	4062.24	2800.95	3756.49	3309.24	2703.39	2472.33	10714.4	11157.7	3315.47	4244.09	3859.29	7013.36	2240.25	1108.23	3401.4	3192.39	2586.66	2932.77	12346.7	11711.7	5644.01	6771.53	4293.88	5543.36	7283.49	7875.16	5260.72	6251.56	1402.32	1537.22	3168.63	4520.61	9115.28	10729.1	4557.53	3735.85	4894.66	4733.87	4220.72	4083.96	733.593	497.086	304.696	808.018	247.635	1144.46	1249.57
501	tr|A0A5C2G4Z5|A0A5C2G4Z5_HUMAN	IGL c4209_light_IGKV3-11_IGKJ3 (Fragment) OS=Homo sapiens OX=9606 PE=2 SV=1	5597.54	5917.54	3093.58	1017.3	5958.64	6821.28	13465.6	16161.2	12219.4	11989.1	4270.63	2781.78	8147.4	8835.89	3930.38	2786.73	3970.37	4104.76	7119.08	1667.46	8891.35	11459.8	7665.51	8116.09	4166.89	3399.23	6708.04	6201.8	4405.17	4244.25	9002.74	9772.25	8350.96	8589	8266.04	6756.11	5446.32	6354.42	8073.52	8245.35	2489.99	504.756	893.593	194.898	1676.94	19977.4	19621.7
502	tr|A0A7S5C0L1|A0A7S5C0L1_HUMAN	IGH c1115_heavy_IGHV5-51_IGHD3-22_IGHJ4 (Fragment) OS=Homo sapiens OX=9606 PE=2 SV=1	369.955	380.522	643.647	151.3	2428.69	2188.03	254.423	239.084	1822.66	1431.37	557.914	365.237	668.299	207.488	377.08	751.354	1036.85	1390.93	477.754	334.585	2148.38	1598.94	174.821	306.411	431.752	148.526	1889.09	319.877	970.575	339.446	1798.81	2193.47	1364.56	101.752	173.818	281.072	1564.58	2270.39	309.574	2743.98	597.416	185.895	174.263	381.872	497.119	1294.71	2240.97
503	tr|A0A5C2G3L5|A0A5C2G3L5_HUMAN	IGL c2027_light_IGLV1-40_IGLJ3 (Fragment) OS=Homo sapiens OX=9606 PE=2 SV=1	442.437	144.738	5692.83	5502.86	3713.47	3331	9723.98	6653.66	2843.97	5808.72	7313.02	3413.25	26739.1	29823.1	1390.73	1046.11	1194.27	388.038	4948.88	5933.08	27299.7	29020.7	19668.5	20033.3	3816.92	3046.33	19836.3	5371.25	4895.45	5100.63	4472.32	4765.08	29690.1	16278.8	231.245	3513.82	9331.87	18921.3	4638.12	4021.85	3501.07	2060.8	1975.12	3533.49	260.701	754.577	2455.07
504	tr|A0A5C2GQ33|A0A5C2GQ33_HUMAN	IG c1506_heavy_IGHV3-21_IGHD5-5_IGHJ6 (Fragment) OS=Homo sapiens OX=9606 PE=2 SV=1	1050.79	186.604	496.899	492.947	1504.9	1384.12	1884.84	978.277	1954.82	1754.84	1247.48	791.08	1149.89	1564.06	1408.43	2105.19	1413.32	235.516	598.148	381.457	352.697	4323.57	1288.14	748.687	431.595	1585.95	2501.64	2584.42	280.029	1127.36	969.285	85.9784	2089.48	1848.19	2456.2	1210.63	1311.4	1851.48	1244.61	1552.38	88629.1	78776.9	83874.5	85020.6	91885.8	52947.5	53779.6
505	tr|A0A5C2G010|A0A5C2G010_HUMAN	IGL c877_light_IGKV3-20_IGKJ2 (Fragment) OS=Homo sapiens OX=9606 PE=2 SV=1	4033.7	1532.29	513.786	771.916	9161.36	11390.6	9628.45	10023.9	883.952	7237.12	9523.97	7617.96	6423.79	6141.6	3307.59	3587.12	380.44	1290.79	491.274	5146.03	7255	3777.08	6229.54	4881.65	5747.68	5467.36	1082.61	4433.59	7483.69	8124.35	5264.38	5040.83	11644.7	13784.8	1892.57	2569.48	15282.3	11598.7	8534.78	7394.39	3637.16	586.864	1096.38	2211.74	4479.39	6164.57	5343.7
506	tr|A0A5C2GU62|A0A5C2GU62_HUMAN	IG c1045_light_IGKV1-16_IGKJ4 (Fragment) OS=Homo sapiens OX=9606 PE=2 SV=1	3139.77	2807.98	3220.7	3922.71	14319.5	14481.2	5725.94	6837.06	1615.36	2995.1	5943.67	4883.24	2781.74	2251.48	7956.91	5320.07	157.046	1502.39	2659.58	3330.31	5202.86	253.772	2552.17	5523.74	6647.62	5211.45	3485.94	3934.49	833.9	483.32	7600.22	7727.66	5639.89	6526.74	3195.09	2690.12	5328.02	3857.25	6822.91	6670.77	1794.29	1207.73	346.904	1031.49	1916.07	4597.25	3356.61
507	tr|A0A5C2FT54|A0A5C2FT54_HUMAN	IGL c118_light_IGKV3-20_IGKJ1 (Fragment) OS=Homo sapiens OX=9606 PE=2 SV=1	5474.47	4443.04	1056.82	1492.37	3428.56	1549.43	20188.8	23760.8	2493.23	3282.57	2428.56	874.515	1926.3	4241.13	517.629	1813.55	9684.64	9254.03	14860.1	1320.44	3276.64	397.618	1006.05	610.301	1041.66	1065.69	1033.81	897.036	22275.5	996.355	332.089	255.969	1083.6	4913.54	75.3925	1539.49	3306.27	4952.07	475.452	1233.68	2439.61	2627.64	495.578	2403.17	4611.89	75246.3	71434.4
508	tr|A0A7S5C550|A0A7S5C550_HUMAN	IGH c1981_heavy_IGHV4-59B_IGHD4-23_IGHJ4 (Fragment) OS=Homo sapiens OX=9606 PE=2 SV=1	2072.84	1263.31	5177.72	5835.97	1446.95	2206.19	6849.87	6414.02	879.681	288.024	1778.66	1673.38	952.331	3825.2	547.092	364.034	625.859	375.04	656.397	1195.73	943.624	387.743	688.827	1497.4	704.18	3391.42	3771.43	2247.5	3365.87	2666.42	563.913	852.198	4915.42	4773.83	5036.81	3232.68	6122.93	6763.21	4315.86	4597.16	248.665	3048.85	3113.84	3658.33	356.657	4521.13	4260.45
509	tr|A0A7S5EW92|A0A7S5EW92_HUMAN	IGH c228_heavy_IGHV4-39_IGHD7-27_IGHJ3 (Fragment) OS=Homo sapiens OX=9606 PE=2 SV=1	20771.6	21451	23262.9	24465.5	22754	24262.7	22555.2	24332.3	26104.7	27541	17801.9	16953.9	16359.1	19681.3	12845.4	10266	8252.44	8705.66	19686.4	16777.6	19406.9	17416	24696.2	23377	34462.2	31146	20314	21297.9	13196.9	11765.9	13050.1	15612.2	22082.3	16046.5	18626.8	16513.2	23913.3	24153.9	26082.2	25543.3	5837.92	9474.31	9511.84	7485.52	9282.7	29061.9	23419.5
510	tr|A0A5C2G0A9|A0A5C2G0A9_HUMAN	IGL c2592_light_IGKV1-12_IGKJ5 (Fragment) OS=Homo sapiens OX=9606 PE=2 SV=1	63962.9	55635.9	61550.6	67433.3	78771.7	83371.8	112361	119911	82835.7	89858.1	51102.9	49499.1	73719.4	75526.7	46519.1	47381.9	26952.6	27372.5	67244.3	55323.6	64241.9	73130	80821.5	74024.3	76031.8	87554.7	94630.4	95818.4	34001.3	34855.9	73664.7	77318.5	71009.2	71242.6	38143.9	42315	105520	88541.4	56296.3	57562.6	19121.5	21690	18943.4	17169.4	18433.4	80149	71114.6
511	tr|A0N5G3|A0N5G3_HUMAN	Rheumatoid factor G9 light chain (Fragment) OS=Homo sapiens OX=9606 GN=V-lambda-3 PE=2 SV=1	624.419	360.036	1076.75	307.641	916.638	375.167	1019.16	1734.58	791.907	957.667	1375.86	1147.02	1300.68	1659.8	1066.64	401.079	253.064	262.323	264.202	1041.49	3471.24	4659.02	2756.45	3187.88	1324.2	1815.28	1748.09	2496.17	633.213	1263.18	1487.83	2323.76	1490.09	3617.44	807.492	1307.34	541.034	1791.85	2343.31	1471.67	681.628	316.267	314.299	1424.17	167.288	534.022	543.193
512	tr|A0A5C2GVG5|A0A5C2GVG5_HUMAN	IG c537_heavy_IGHV3-74_IGHD1-26_IGHJ6 (Fragment) OS=Homo sapiens OX=9606 PE=2 SV=1	350.77	503.41	755.182	1258.26	660.542	701.992	223.274	2233.89	656.918	626.443	409.829	600.588	815.33	710.649	550.745	582.017	677.998	130.105	903.573	443.049	432.184	350.1	729.646	451.935	216.766	1706.56	285.089	493.357	529.139	160.125	262.52	116.806	475.757	1706.41	687.079	340.725	771.446	168.625	39748.3	41942.2	532.531	348.852	217.541	555.234	772.609	1739.19	933.771
513	tr|A0A5C2G235|A0A5C2G235_HUMAN	IGL c2610_light_IGKV1D-39_IGKJ1 (Fragment) OS=Homo sapiens OX=9606 PE=2 SV=1	2821.59	2681.83	3282.87	4233.56	453.648	4100.1	330.093	1963.22	1860.9	1504.92	819.261	3716.4	1233.48	410.499	1176.36	734.131	157.747	1592.78	788.593	3497.8	343.401	803.816	674.759	546.135	300.796	1006.21	1883.55	689.918	151.775	419.579	506.705	5149.37	135.615	3288.93	1821.28	2150.71	1209.15	2425.05	1743.21	2425.44	817.968	119.275	400.549	290.246	611.435	1657.91	519.532
514	tr|A0A5C2H133|A0A5C2H133_HUMAN	IG c1618_light_IGKV1-5_IGKJ4 (Fragment) OS=Homo sapiens OX=9606 PE=2 SV=1	2959.22	1369.5	1967.82	1072.08	1166.16	2038.83	995.168	505.189	3088.03	1302.53	2446.44	240.077	5296.67	3410.12	1599.88	2395.45	1377.33	654.226	2880.67	1645.73	1339.68	4187.84	321.98	4111.68	2416.8	2790.26	1249.95	1450.13	1219.91	4812.5	1408.9	1278.99	481.198	2458.21	1825.18	1034.34	2706.32	4323.75	1173.52	982.075	4825.11	2704.62	235.882	797.003	3473.03	3468.17	4099.1
515	tr|A0A5C2H214|A0A5C2H214_HUMAN	IG c986_light_IGLV1-40_IGLJ2 (Fragment) OS=Homo sapiens OX=9606 PE=2 SV=1	1576.3	14395.5	339.553	16506.5	373.502	3024.23	4693.05	15064.2	887.62	4393.68	13659.1	286.953	1095.3	1477.83	8428.64	1080.1	597.673	1736.67	22745.9	2631.92	11655.7	583.682	127.206	11223.5	521.589	2921.83	2372.21	3041.39	1025.35	2711.72	1678.82	264.981	6422.43	712.687	3625.71	3244.24	3405.23	2049.46	5817.16	2050.12	5772.89	4667.02	3388.87	5817.41	1598.04	66920.9	65603.6
516	tr|A0A7S5C434|A0A7S5C434_HUMAN	IGH c3696_heavy_IGHV3-30_IGHD5-24_IGHJ6 (Fragment) OS=Homo sapiens OX=9606 PE=2 SV=1	3828.98	1588.44	5590.28	1849.04	2258.01	5036	11506.4	10509.2	16918.8	21416.3	613.47	1887.09	8891.04	7141.98	1958.21	1523.22	4023.25	3870.11	746.299	16229.3	6057.5	6462.44	22817.8	25391.9	6031.5	11000.1	14843.1	15690.6	4995.32	5217.56	9736.51	12057.8	8703.01	14341.7	16748.5	14128.7	12318.7	8581.87	12708.9	13312.8	1592.59	268.103	335.787	1099.95	2592.34	7317.14	2648.48
517	tr|A0A5C2GKP8|A0A5C2GKP8_HUMAN	IGH + IGL c617_light_IGKV1-33_IGKJ4 (Fragment) OS=Homo sapiens OX=9606 PE=2 SV=1	951.665	1084.7	705.983	1864.82	1652.1	818.68	1920.64	3454.93	2933.34	443.042	664.465	420.945	594.484	433.302	177.292	736.246	636.085	640.435	328.288	250.086	2103.08	1148.82	1922.01	804.915	2150.05	1212	716.23	1825.85	847.154	616.237	549.248	2081.96	1305.11	1882.56	440.099	832.074	191.217	1875.48	747.236	521.104	487.21	884.258	156.297	440.038	423.705	1356.76	274.951
518	tr|A0A5C2GSM5|A0A5C2GSM5_HUMAN	IG c1149_light_IGLV1-40_IGLJ3 (Fragment) OS=Homo sapiens OX=9606 PE=2 SV=1	2116.53	3002.34	2358.1	3139.21	3651.3	919.571	2146.53	4830.28	2654.57	4022.69	685.023	6296.96	5604.37	2311.62	4486.35	3400.68	381.151	1175.36	767.44	8436.35	2363.17	2771.32	6130.37	6071.87	3170.28	2225.03	3158.38	3171.81	5193.67	4958.48	6031.65	1469.6	7697.85	4112.21	309.899	2853.91	8103.43	9304.54	2385.8	3278.08	1710.52	1992.53	1093.67	1514.14	1283.84	7189.18	6668.7
519	tr|A0A5C2FU63|A0A5C2FU63_HUMAN	IGL c282_light_IGLV1-47_IGLJ2 (Fragment) OS=Homo sapiens OX=9606 PE=2 SV=1	930.53	1364.42	2214.75	1733.65	1016.77	416.991	804.457	157.677	2132.55	431.765	382.941	1120.12	793.802	1797.66	880.284	266.867	1092.85	2090.53	1471	2997.8	2802.13	2405.14	2203.19	2389.18	1832.6	990.053	3692.62	4197.93	2204.06	263.825	15740.7	18360.8	7452.01	7549.58	1870.66	1691.35	2231.79	4675.73	2184.18	494.654	522.563	548.622	363.554	469.419	693.96	1195.07	1581.71
520	tr|A0A140KFU0|A0A140KFU0_HUMAN	Beta globin (Fragment) OS=Homo sapiens OX=9606 GN=hbb PE=3 SV=1	64186.9	54071	51960.8	48975.7	1.39254e+06	1.38391e+06	25572.5	25158.1	101909	104680	103034	104571	48503.9	51995.5	37091.8	35477.9	15493.9	14532.6	17398.6	18735.5	212884	224495	147202	146015	1.12069e+06	1.08727e+06	194334	186388	265193	243047	1.3815e+06	1.32016e+06	52113.5	51597.7	1.04552e+06	1.0776e+06	229298	224777	39070.4	39702.2	100317	88231.1	103206	100319	83199	38221	35361.2
521	tr|A0A5C2GHU1|A0A5C2GHU1_HUMAN	IG c789_heavy_IGHV1-18_IGHD3-22_IGHJ3 (Fragment) OS=Homo sapiens OX=9606 PE=2 SV=1	187.733	92.8899	552.271	1333.59	1533.05	1078.54	205.592	1249.05	137.102	627.721	11093.5	1048.88	15035.9	427.356	13593	11101.3	329.753	367.116	9637.44	572.738	941.211	459.831	695.02	1676.56	243.694	113.798	868.946	1052.5	913.025	2192.75	824.371	198.119	1165.45	1894.49	704.244	492.033	2523.5	906.89	357.633	157.363	136.17	716.474	156.658	325.048	176.322	3436.62	3696.68
522	tr|A0A5C2G4D1|A0A5C2G4D1_HUMAN	IGL c3420_light_IGLV3-1_IGLJ2 (Fragment) OS=Homo sapiens OX=9606 PE=2 SV=1	1302.68	908.724	602.043	594.115	2385.61	848.409	767.342	1835.95	1157.92	1133.48	571.16	930.447	1868.2	562.323	1359.74	1295.39	565.757	348.186	1072.25	202.198	156.529	732.732	2166.01	2146.24	673.633	449.273	664.094	1302.07	188.824	831.859	509.322	640.667	418.097	3062.59	1582.66	440.47	2564.88	1467.47	1646.93	1071.67	258.098	341.416	540.252	530.912	387.244	1451.29	851.373
523	tr|A0A7S5C115|A0A7S5C115_HUMAN	IGH c1867_heavy_IGHV3-49_IGHD2-2_IGHJ6 (Fragment) OS=Homo sapiens OX=9606 PE=2 SV=1	4939.32	4204.68	3992.08	261.919	2477.98	1870.98	1591.44	2092.01	4180.5	4063.17	1983.06	1895.84	1067.47	223.473	622.57	656.937	899.399	123.388	6028.56	1282.04	28188.5	27421.8	3077.58	1302.42	1469.48	180.157	1722.46	1961.28	681.077	468.457	14515.3	12374.6	6190.4	6202.42	3876.88	3249.61	9974.8	9954.38	6301.21	6844.99	238.356	4000.56	169.75	291.073	281.679	1164.66	1038.86
524	tr|A0A5C2GRL6|A0A5C2GRL6_HUMAN	IG c105_light_IGLV8-61_IGLJ3 (Fragment) OS=Homo sapiens OX=9606 PE=2 SV=1	2662.16	3005.9	5400.39	7114.07	3403.23	3364.17	1227.68	1401.48	2135.22	143.766	7539.53	9725.19	6612.84	7665.23	1641	2345.98	1619	182.716	2034.41	2048.59	2208.64	2294.41	4376.51	5271.91	8561.53	7898.63	2672.91	2980.94	8362.92	7520.77	2845.19	3171.72	3291.46	2991.61	3826.93	2742.34	1628.27	4460.47	6017.28	6094.35	2867.66	4001.38	3058.53	2649.51	324.056	54032.5	46195.4
525	tr|A0A5C2GUI7|A0A5C2GUI7_HUMAN	IG c433_light_IGKV2D-29_IGKJ1 (Fragment) OS=Homo sapiens OX=9606 PE=2 SV=1	911.202	266.854	763.673	781.293	187.399	363.704	159.505	614.52	800.966	393.009	579.652	647.934	531.627	241.403	246.23	489.222	352.48	272.221	290.452	290.42	735.219	429.82	112.775	440.623	433.271	426.876	98.8288	172.927	798.751	235.525	289.932	115.732	646.239	765.563	792.425	251.494	669.926	860.856	496.652	428.975	399.185	447.781	474.543	309.162	196.827	1341.12	1571.72
526	tr|A0A5C2G1F2|A0A5C2G1F2_HUMAN	IGL c1297_light_IGLV1-51_IGLJ3 (Fragment) OS=Homo sapiens OX=9606 PE=2 SV=1	5237.31	3662.28	441.651	820.501	2625.18	3592.04	16099.7	15679	5435.73	7480.93	8020.5	8588.93	2622.52	4142.21	1455.82	2388.76	347.829	2678.43	3388.69	2288.81	2113.91	2285.97	4107.5	2639.19	2814.37	4590.33	3597.7	5186.08	6597.54	269.675	4997.62	2226.94	4146.82	3870.8	2425.23	1155.79	6303.58	5338.96	3305.45	2121.18	2471.23	364.336	2000.84	4944.19	4062.34	3259.5	3966.85
527	tr|A0A5C2G5I3|A0A5C2G5I3_HUMAN	IGL c3115_light_IGLV7-46_IGLJ1 (Fragment) OS=Homo sapiens OX=9606 PE=2 SV=1	386.603	15785.7	20370.4	4601.93	6141.37	7819.42	6756.99	5521.74	861.267	5342.13	9181.29	23804.4	10144.1	9921.37	21108.3	17815.8	1111.32	8974.99	877.833	4628.23	1622.54	6972.66	11138.8	6085.23	7168.93	870.973	12341.9	13503.9	7182.78	1741.9	8531.37	723.337	6987.56	6215.62	11317.6	9670.99	5239.27	1202.16	8331.87	10262.7	5392.18	373.09	6953.93	5257.1	1501.58	68338.1	63881.3
528	tr|A0A7S5C443|A0A7S5C443_HUMAN	IGH c3204_heavy_IGHV4-39_IGHD4-23_IGHJ5 (Fragment) OS=Homo sapiens OX=9606 PE=2 SV=1	448.294	399.15	187.887	138.192	145.305	550.203	718.422	716.65	441.466	218.838	2356.64	238.628	196.226	347.307	1598.9	582.206	401.245	294.078	171.097	322.394	187.227	425.434	307.95	225.948	405.522	201.939	339.446	249.378	186.454	272.586	507.556	509.762	484.153	452.017	137.304	245.617	156.188	331.003	374.44	633.173	502.915	425.723	722.146	356.807	1101.11	1364.26	1184.71
529	tr|A0A5C2G6A9|A0A5C2G6A9_HUMAN	IGL c4180_light_IGLV2-14_IGLJ1 (Fragment) OS=Homo sapiens OX=9606 PE=2 SV=1	3665.9	2906.33	1012.74	346.3	723.541	985.363	346.601	2181.19	434.97	458.222	338.983	288.14	439.808	369.937	826.393	614.589	1231.38	763.77	454.278	2625.75	492.492	273.964	133.474	1602.04	511.543	415.998	327.57	258.768	870.039	226.436	2218.63	1286.06	938.421	746.331	611.077	771.747	943.368	171.893	269.138	833.16	1842.5	1315.06	211.513	1812.02	1835.44	22913.1	21052.4
530	tr|A0A5C2GBZ9|A0A5C2GBZ9_HUMAN	IGH + IGL c178_light_IGKV3-15_IGKJ5 (Fragment) OS=Homo sapiens OX=9606 PE=2 SV=1	1230.98	618.274	391.583	166.894	1354.05	83.4935	711.145	219.334	1083.31	368.391	491.435	598.318	173.439	726.849	464.087	2937.24	439.292	73.5317	5884.94	401.861	1966.23	1483.39	1486.05	918.586	829.077	420.139	803.417	1115.35	867.599	842.268	1651.75	1596.37	531.799	908.398	227.974	110.254	1247.6	859.935	1022.88	809.675	399.097	134.167	258.505	359.904	161.268	1042.04	326.481
531	tr|A0A5C2GAN8|A0A5C2GAN8_HUMAN	IGL c492_light_IGLV3-21_IGLJ1 (Fragment) OS=Homo sapiens OX=9606 PE=2 SV=1	230.275	123.017	730.716	524.843	370.594	407.086	1114.14	424.119	338.458	282.581	264.582	171.838	157.249	280.795	130.26	427.521	256.057	0	170.593	0	426.195	113.542	340.955	843.879	315.397	320.898	550.041	316.187	520.43	352.15	227.013	351.325	2401.57	1991.83	401	176.717	124.7	516.897	431.872	366.843	185.664	107.252	0	102.71	376.479	227.125	286.183
532	tr|V9HWE1|V9HWE1_HUMAN	Vimentin OS=Homo sapiens OX=9606 GN=HEL113 PE=2 SV=1	1243.61	2754.99	699.694	406.975	1439.36	217.337	894.283	1737.44	241.353	784.557	1388.47	866.15	2224.09	477.691	872.892	636.017	125.481	296.697	539.627	1339.33	461.338	2375.6	1564.29	610.44	891.714	200.064	1447.43	1331.23	1014.29	1590.28	599.665	1569.45	234.299	2392.38	1183.93	139.397	568.19	497.999	2321.42	540.34	418.689	208.339	713.377	244.334	304.051	310.005	219.606
533	tr|Q9UPY7|Q9UPY7_HUMAN	Fc-gamma receptor IIIb (CD 16) OS=Homo sapiens OX=9606 GN=Fc-gamma receptor IIIB PE=2 SV=1	3641.8	4915.66	183.321	3986.94	140.459	2686.09	2476.94	5081.74	2128.44	3026.68	5334.61	6846.03	1905.67	1735.01	377.028	2350.5	193.104	4419.86	711.632	731.867	1643.16	1687.56	3835.82	1370.45	2132.38	2280.24	730.829	792.745	2955.32	2627.8	121.142	4562.45	1604.78	1829.6	1921.4	2271	5596.41	4004.21	1628.35	2267.02	177.384	438.566	254.026	321.283	1181.25	855.82	1362.6
534	tr|H0Y755|H0Y755_HUMAN	Low affinity immunoglobulin gamma Fc region receptor III-A OS=Homo sapiens OX=9606 GN=FCGR3A PE=1 SV=3	7792.73	7783.55	882.06	4252.31	6983.82	4704.02	2173.48	5746.44	5488.85	2184.98	4088.11	8813.08	485.546	6966.68	15052.9	1268.25	1992.84	4551	6162.97	11944.1	8911.26	2117.14	1326.08	1272.26	6169.89	4498.86	9100.95	6700.16	8147.23	6454.9	5138.31	9638.9	9377.63	5429.24	72.3634	9046.21	12954.1	13276.7	1479.85	5216.91	3850.77	2658.19	2799.46	174.996	6140.5	5520.37	7112.34
535	tr|B2R773|B2R773_HUMAN	cDNA, FLJ93312, highly similar to Homo sapiens adipose most abundant gene transcript 1 (APM1), mRNA OS=Homo sapiens OX=9606 PE=2 SV=1	5221.89	6246.12	6883.97	7624.98	4149.02	4452.93	4987.69	5337.65	1273.79	1429.82	996.069	2769.09	1025.92	238.921	4213.36	5947.02	2559.97	842.543	12915.4	11332.8	1009.12	4246.19	2434	2433.32	4858.29	5456.78	3863.59	3564.95	3989.77	3224.03	540.034	2750.47	3139.63	3295.03	4680.99	4448.62	5020.68	3469.74	4917.63	1468.88	671.522	796.221	901.702	540.139	352.449	794.829	2331.1
536	tr|A0A7S5BYJ7|A0A7S5BYJ7_HUMAN	IGH c627_heavy_IGHV4-39_IGHD1-26_IGHJ6 (Fragment) OS=Homo sapiens OX=9606 PE=2 SV=1	217.577	627.99	345.31	121.214	376.758	1334.35	349.9	539.553	209.957	337.996	119.509	155.154	294.17	140.555	230.862	0	124.029	423.138	224.187	0	510.948	241.106	86.1147	163.532	175.8	212.612	44.7333	141.083	424.114	319.248	418.727	648.834	528.127	193.664	390.063	310.582	258.011	856.677	587.555	147.335	375.857	158.098	129.159	157.715	176.439	5280.42	3906.87
537	tr|Q6FHE2|Q6FHE2_HUMAN	ICAM2 protein OS=Homo sapiens OX=9606 GN=ICAM2 PE=2 SV=1	372.38	1530.27	1793.13	2359.78	1329.61	4054.76	4307.87	4079.78	673.155	384.928	4213.59	3773.59	772.669	393.757	215.343	556.972	89.2911	116.166	1034.14	781.446	578.238	277.526	806.134	641.939	499.933	308.799	516.225	473.346	5882.92	7330.51	561.832	1153.91	2774.66	768.314	861.615	1938.02	16085.5	800.602	2204.17	1328.67	4411.83	2701.57	4005.55	1756.08	4076.98	1523.56	4459.22
538	tr|Q5STZ8|Q5STZ8_HUMAN	ATP-binding cassette sub-family F member 1 OS=Homo sapiens OX=9606 GN=ABCF1 PE=1 SV=10	39605	45633.3	32384.7	31718.3	46855.9	30606.9	37653.5	34592.8	31421	34404.4	37209	43008.9	33545.4	34952.6	36764.5	60106.4	28765.6	29469.9	45917	54460.8	50133	51328.5	28275.4	18774.5	41911.6	82112.8	34236.6	34630.2	34610	34540.2	18722.3	29706.9	33598.4	31420.5	25718.6	23427.9	41056.2	20403.7	30539.6	22317.5	14952.7	15019.7	12573.6	8877.57	179.117	13346.1	12795.9
539	tr|B3KUT5|B3KUT5_HUMAN	HCG1645996, isoform CRA_b OS=Homo sapiens OX=9606 GN=hCG_1645996 PE=2 SV=1	103144	100351	138179	147075	180715	204852	174453	191322	127316	142848	147906	129447	118063	127734	142689	136568	118524	96100.7	110953	108157	114084	99831.9	117237	141395	75264	70598.5	77500.8	95396.8	186515	166302	211469	200617	173631	183919	108472	101916	138024	127710	146101	171566	251278	261879	242862	313237	314450	310935	244280
540	tr|A0A5C2GVN1|A0A5C2GVN1_HUMAN	IG c1367_light_IGLV9-49_IGLJ3 (Fragment) OS=Homo sapiens OX=9606 PE=2 SV=1	2221.79	965.734	3815.67	4081.43	18279.3	18781.7	9837.5	6328.08	13072.3	14780	15045.9	10755.2	14647.9	4695.99	12076.9	12915.1	5259.53	4901.53	12749	5524.68	14609.8	15903.3	14716.7	14651.4	23008	22792.5	7574.08	8474.62	12448.6	13036.3	12519.1	11521	13960.5	14555	13301.3	9226.57	27788.6	23723.5	9519.68	11497.9	12388.9	7019.13	12713.1	9074.32	10397.6	22018.8	17456.4
541	tr|A0A5C2G3C9|A0A5C2G3C9_HUMAN	IGL c3424_light_IGKV3-20_IGKJ1 (Fragment) OS=Homo sapiens OX=9606 PE=2 SV=1	1210.14	1298.33	510.511	2409.88	98.0459	293.385	1491.64	236.418	245.753	267.523	1816.03	575.992	305.152	544.386	838.154	847.804	1158.97	612.541	50.4761	1907.52	1698.62	122.386	74.2499	1398.85	258.449	331.077	1289.39	308.697	648.045	853.978	1658.44	1747.08	722.62	308.195	865.165	100.487	62356.6	54535	859.657	345.185	433.021	524.892	201.296	117.143	164.791	172.372	433.941
542	tr|V9GZN0|V9GZN0_HUMAN	Uncharacterized protein (Fragment) OS=Homo sapiens OX=9606 PE=3 SV=1	1721.61	2333.19	2134.74	2661.24	5010.93	18877.2	8718.54	546.929	404.995	16771	553.951	8235.11	4801.96	4508.53	6426.21	1187.44	489.495	1931.94	6035.24	1446.3	1499.72	1280.84	1149.46	3291.28	4245.04	1419.65	8224.87	5302.78	8212.51	7087.02	7258.61	850.864	3155.72	4965.59	778.455	224.749	6549.21	678	4276.64	3978.83	1265.89	2695.1	5273.89	920.645	2599.04	1728.41	1058.64
543	tr|U3KPS2|U3KPS2_HUMAN	Myeloblastin OS=Homo sapiens OX=9606 GN=PRTN3 PE=1 SV=1	470.119	1110.83	1009.99	144.528	976.991	1946.8	1702.15	659.076	1564.98	1189.14	644.393	2146.4	1743.34	2326.39	730.467	666.573	269.18	155.005	640.435	968.963	322.116	697.686	1828.84	434.307	948.787	2644.7	2025.15	1398.29	1401	570.326	1778.21	720.983	324.571	553.117	752.526	966.282	1143.14	420.211	1893.46	1761.97	6039.14	1647.79	1116.95	943.336	1385.85	1876.54	4374.96
544	tr|Q71VH6|Q71VH6_HUMAN	1-acyl-sn-glycerol-3-phosphate acyltransferase (Fragment) OS=Homo sapiens OX=9606 PE=2 SV=1	553.056	2204.92	3327.1	2942.85	245.685	725.158	254.839	2971.3	862.051	1694.29	5290.54	339.729	853.481	2219.64	5440.32	4496.54	1132.22	853.718	976.169	2693.17	191.385	99.683	1563.97	1366.64	870.064	1600.33	572.314	694.188	210.635	2875.71	4033.54	4368.94	11146.4	11099.1	205.245	308.403	1515.91	1439.71	919.687	657.367	535.327	1018.95	273.532	615.29	482.858	867.365	1565.97
545	tr|B3KU41|B3KU41_HUMAN	cDNA FLJ39170 fis, clone OCBBF2003028, highly similar to Rattus norvegicus basic leucine zipper and W2 domains 1 (Bzw1), mRNA OS=Homo sapiens OX=9606 PE=2 SV=1	1632.62	2830.25	1961.56	1822.42	912.199	117.735	631.152	1466.32	1122.91	705.229	1093.61	1373.48	2662.68	2094.07	931.798	2452.49	1402.84	161.364	4736.27	3589.82	4863.2	248.966	2481.71	2302.61	1612.31	1770.17	4975.11	3654.71	824.097	1557.22	3325.61	4337.89	1259.32	1753.31	10322.3	8632.86	5306.05	4923.4	2167.31	1831.61	316.767	279.431	260.707	247.865	402.564	891.385	584.779
546	tr|A0A024R8H7|A0A024R8H7_HUMAN	F-box and WD-40 domain protein 5, isoform CRA_a OS=Homo sapiens OX=9606 GN=FBXW5 PE=4 SV=1	9.10563e+06	7.32119e+06	7.3909e+06	8.48104e+06	8.85901e+06	6.9255e+06	6.60063e+06	34537.6	1.32026e+07	1.3652e+07	7.89874e+06	8.00521e+06	45483.2	41227.3	8.18063e+06	8.40312e+06	122534	118929	1.11263e+07	1.10969e+07	5.05032e+06	70781.7	56854	6.85407e+06	80811.9	79342	192742	197444	118880	118422	5.00768e+06	109081	6.8798e+06	7.45471e+06	187374	177934	97898.6	4.20045e+06	6.01916e+06	160301	41546.7	4.65241e+06	38660.5	4.8736e+06	4.63013e+06	4.255e+06	4.01541e+06
547	tr|A0A5C2G8C0|A0A5C2G8C0_HUMAN	IGH + IGL c34_heavy_IGHV3-21_IGHD2-2_IGHJ4 (Fragment) OS=Homo sapiens OX=9606 PE=2 SV=1	3150.38	3982.17	3467.47	1462.78	13169.2	13461.2	1640.01	4937.17	2863.83	1594.93	1209.9	3014.88	1380.52	2051.19	476.835	2835.67	1318.24	1133.19	1562.31	3501.42	2433.73	1215.97	1167.04	959.819	407.69	1378.17	3949.92	4219.54	3386.32	2918.34	2008.09	241.753	949.801	5619.72	115.836	2670.87	1154.04	5644.19	3927.66	3663.16	1098.81	1674.83	2383.17	309.966	647.573	2424.14	3903.85
548	tr|B4DIK5|B4DIK5_HUMAN	cDNA FLJ57991, highly similar to Caspase recruitment domain-containing protein9 OS=Homo sapiens OX=9606 PE=2 SV=1	216318	6192.19	188892	175072	5030.03	209.958	7994.56	802.73	5897.4	9306.29	5146.79	1439.84	199672	201595	9134.51	209077	128393	140321	21512.2	267423	175951	9493.38	9042.34	2705.75	7431.46	7464.7	9600.21	7694.05	12621.8	20215.7	119504	7139.31	11300.8	138205	95610.7	84166.4	8622.1	192550	744.291	119236	3601.6	2969.02	5773.97	132843	0	842.574	6661.82
549	tr|A0A5C2GVT8|A0A5C2GVT8_HUMAN	IG c1695_light_IGLV1-47_IGLJ2 (Fragment) OS=Homo sapiens OX=9606 PE=2 SV=1	1258.52	1265.16	2838.19	2472	3770.96	4194.72	4641.18	2063.57	4461	4531.15	1567.09	756.544	1282.42	1496.05	1098.5	950.456	1222.29	308.499	4138.04	3972.1	2018.93	2410.38	4874.23	6126.39	2124.9	3001.28	5986.86	4347.73	4090.28	4720.94	5384.4	5805.28	5443.7	5098.7	2406.63	2055.29	3206.58	3700.06	3274.34	2049.28	2582.54	1883.58	2104.51	2787.78	182.419	10453.6	8018.9
550	tr|A0A7S5C6S8|A0A7S5C6S8_HUMAN	IGH c3220_heavy_IGHV3-49_IGHD2-15_IGHJ3 (Fragment) OS=Homo sapiens OX=9606 PE=2 SV=1	1584.07	384.904	1509.31	291.216	1220.92	82.3129	207.623	1507.49	307.845	2796.21	247.117	462.325	1874.92	1767.72	558.299	291.08	266.759	479.25	1538.14	807.271	454.824	93.3753	1701.79	1006.02	813.747	401.325	495.924	1809.82	1119.04	923.602	1227.55	2475.3	1801.9	2358.24	1170.07	713.906	810.701	1919.76	181.043	1231.47	336.228	259.128	176.288	587.666	183.847	178.914	283.948
551	tr|A0A7S5C2Y3|A0A7S5C2Y3_HUMAN	IGH c3238_heavy_IGHV4-34_IGHD3-22_IGHJ5 (Fragment) OS=Homo sapiens OX=9606 PE=2 SV=1	2558.38	2564.99	2243.35	1565.83	1769.53	852.019	1104.31	6422.21	1331.87	2717.99	496.725	2242.47	202.294	2694.82	4198.73	2049.8	231.935	243.967	1447.41	1236.4	1222.04	1676.32	3757.48	4348.61	477.165	1148.7	1622.28	3187.1	6037.36	3288.55	3125.37	726.712	3642.46	357.082	7849.55	7718.32	5498.3	3986.11	5852.4	3649.19	1751.99	4931.55	391.122	8130.59	7877.95	4621.84	5510.62
552	sp|P01714|LV319_HUMAN	Immunoglobulin lambda variable 3-19 OS=Homo sapiens OX=9606 GN=IGLV3-19 PE=1 SV=2	1693.5	268.704	739.328	869.018	3150.24	4316.37	3509.1	1329.56	1107.96	436.629	2437.51	3295.65	1155.21	984.083	1304.58	2348.48	595.184	628.822	1309.02	1270.9	947.678	1012.09	1833.4	1035.09	2696.6	3211.87	954.727	1349.92	2196.07	2499.63	2876.08	923.648	937.411	3948.54	2542.19	1348.28	4339.96	4056.64	2836.58	1921.16	1334.1	1748.49	615.741	723.329	3214.6	3001.48	2675.53
553	tr|A0A5C2G8Z1|A0A5C2G8Z1_HUMAN	IGH + IGL c153_heavy_IGHV1-69_IGHD6-13_IGHJ6 (Fragment) OS=Homo sapiens OX=9606 PE=2 SV=1	3316.5	2254.18	2245.15	4234.6	7628.94	8634.88	5256.01	2547.04	6475.47	6254.92	1978.31	5035.48	2970	1512.88	1568.32	2031.96	3403.66	2825.6	3585.79	6653.91	6121.24	5731.66	10627.3	10753.5	634.032	7353.5	3415.55	2885.97	389.089	1777.31	4234.24	5641.89	6259.55	5082.51	4026.61	3287.49	15015.7	12254.7	6578.59	5843.17	799.854	1220.58	356.262	1522.2	386.649	11446.6	10497.3
554	tr|A0A5C2GJG7|A0A5C2GJG7_HUMAN	IGH + IGL c147_light_IGKV2-24_IGKJ1 (Fragment) OS=Homo sapiens OX=9606 PE=2 SV=1	1415.77	169.433	2293.56	4053.01	1865.52	3373.87	754.361	5079.95	1552.46	1034.74	3787.66	2733.34	2441.45	663.246	2856.57	1985.29	1715.92	223.636	1371.45	7792.48	2409.28	3546.16	2664.33	3418	1354.2	2369.71	2243.6	717.173	3375.01	2742.98	370.121	1754.07	3185.26	690.914	1035.23	1430.23	1977.42	5116.8	4375.08	1094.73	1476.02	1351.39	2106.71	192.92	1812.53	1560.88	606.077
555	tr|A0A5C2G466|A0A5C2G466_HUMAN	IGL c3972_light_IGLV3-21_IGLJ2 (Fragment) OS=Homo sapiens OX=9606 PE=2 SV=1	1867.94	240.499	406.635	2157.26	518.849	657.345	250.279	307.076	1856.3	193.433	1559.11	268.333	372.684	870.442	351.565	273.163	273.259	180.771	571.372	737.848	137.637	235.862	634.479	937.429	231.932	116.288	154.595	187.542	1598.19	420.289	313.583	415.416	1616.82	189.194	263.205	141.136	1925.66	1628.14	270.718	1115.27	108.981	114.427	28.0892	443.444	988.614	304.932	832.792
556	tr|A0A5C2G898|A0A5C2G898_HUMAN	IGL c240_light_IGKV3-20_IGKJ2 (Fragment) OS=Homo sapiens OX=9606 PE=2 SV=1	12516.7	11205.1	3048.88	4563.27	6872.54	5902.25	9188.22	9174.08	6402.71	8659.07	5202.79	7742.97	4308.78	1304.21	35071.8	31665.4	451.803	3336.53	9239.58	9709.63	9400.57	9676.58	6484.3	6677.33	19864.2	20190.3	12254.6	13877.2	2417.17	2455.43	5215.93	5724.78	9784.77	9962.63	4270.02	4657.27	11556	9682	10183.7	9637.05	2519.18	519.534	1944.61	5987.48	1637.59	12685.3	11880.9
557	tr|S6C4R7|S6C4R7_HUMAN	IgG L chain OS=Homo sapiens OX=9606 PE=2 SV=1	427.476	568.078	540.534	718.915	1527.78	2748.96	4465.17	5332.78	1434.71	1621.22	230.061	1102.06	1577.94	266.397	6580.24	7055.69	2966.74	1421.19	8948.75	6741.23	3938.1	1806.16	3668.04	1243.21	506.303	611.172	4985.79	3279.01	1366.29	1447.8	86.2016	658.373	4674.76	6597.38	576.383	1094.77	965.544	509.809	877.761	1053.6	793.407	981.606	758.21	0	0	7392.84	5662.12
558	tr|A0A5C2GF74|A0A5C2GF74_HUMAN	IG c376_heavy_IGHV3-21_IGHD3-9_IGHJ4 (Fragment) OS=Homo sapiens OX=9606 PE=2 SV=1	1495.85	1738.28	3186.16	2967.35	4312	1668.33	10270.6	6328.09	4928.82	4624.15	387.97	488.575	2534.48	348.28	2524.3	3557.58	1670.73	2628.55	7333.15	6138.97	6890.31	7067.08	6407.98	4147.05	2287.66	1501.62	3326.37	1945	212.941	2339.04	3501.22	3141.28	4191.92	2522.56	951.193	907.55	10183.8	7062.86	6493.38	6516.67	136.624	1624.75	1982.07	1745.99	2306.18	20745	15540.7
559	tr|W6MEN4|W6MEN4_HUMAN	Beta-1,4-galactosyltransferase 1 OS=Homo sapiens OX=9606 GN=B4GALT1 PE=2 SV=1	372.959	223.863	398.64	204.764	376.568	483.999	440.491	342.825	162.609	883.783	816.779	848.097	100.491	1008.17	720.578	620.059	345.491	154.081	303.565	255.864	453.925	654.476	485.254	296.206	424.575	295.407	436.556	152.511	687.195	549.594	467.829	741.696	159.342	376.657	1682.98	911.427	1415.02	759.645	446.743	490.532	1099.08	358.389	890.469	474.557	447.219	639.187	453.945
560	tr|Q57Z91|Q57Z91_HUMAN	Uncharacterized protein KIF5C (Fragment) OS=Homo sapiens OX=9606 GN=KIF5C PE=3 SV=1	4524.35	4076.74	2661.2	4468.12	2106.64	3119.09	1171.01	1335.8	3185.88	3275.58	4445.71	670.254	2445.35	479.079	3507.87	2671.88	3720.65	3141.61	5380.89	5000.51	6199.63	4411.06	2858.6	2638.96	1915	4596.23	4460.12	2800.81	2362.01	3337.11	223.157	1974.11	161.066	3247.72	2355.3	2452.08	959.671	3312.75	2643.23	1756.26	2423.61	808.306	1368.51	455.667	0	1999.64	3013.56
561	tr|A0A5C2GP40|A0A5C2GP40_HUMAN	IG c444_heavy_IGHV3-48_IGHD6-6_IGHJ4 (Fragment) OS=Homo sapiens OX=9606 PE=2 SV=1	5495.23	2757.31	5066.31	6129.54	13675.1	10558.1	13571.9	16818.2	5212.56	7124.78	10370.3	9742.96	14800	13647.8	8512.16	1320.57	2453.35	2287.29	12005.9	2079.29	22783.7	18984	8543.94	12339.7	5036.72	11638.3	9780.74	10101	4756.06	16371.8	10339	13136.8	5079.03	9494.66	4289.59	4305.22	7256.87	11268.4	12719.4	13444.5	6332	2398.34	2434.15	6383.65	2636.75	5045.82	5321.57
562	tr|A0A5C2GJU2|A0A5C2GJU2_HUMAN	IG c195_heavy_IGHV3-30_IGHD1-26_IGHJ4 (Fragment) OS=Homo sapiens OX=9606 PE=2 SV=1	709.863	637.697	2896.45	792.981	1174.33	580.045	4845.13	578.058	971.97	1828.09	6385.98	7658.24	4523.5	3960.82	5228.95	4172.4	617.505	335.644	11817.7	9561.35	8909.57	5842.08	941.493	784.682	1144.71	2764.63	696.753	3495.11	981.505	1264.9	305.769	890.626	6226.81	5038.65	657.637	363.11	12764.7	1204.03	4468.74	2830.57	423.868	297.473	491.232	402.657	1430.3	5231.93	390.272
563	tr|A0A2U8J8I9|A0A2U8J8I9_HUMAN	Ig heavy chain variable region (Fragment) OS=Homo sapiens OX=9606 GN=IgH PE=2 SV=1	1879.4	4490.96	3882.51	4257.11	4069.19	707.791	3009.56	1373.44	5765.47	4357.21	9374.38	2767.31	2459.05	694.904	8211.84	7860.6	6910.1	6096.26	368.057	6070.83	1807.82	2408.28	7295.27	1197.47	12122.2	6785.92	11448.6	9127.25	4965.31	813.627	449.051	2703.07	2230.39	1057.54	163.947	5585.6	11955.6	7896.92	7619.29	3362.12	1669.19	2351.65	2680.36	6856.4	8379.33	9923.58	7378.07
564	tr|A0A5C2GE26|A0A5C2GE26_HUMAN	IG c1327_heavy_IGHV3-21_IGHD3-3_IGHJ6 (Fragment) OS=Homo sapiens OX=9606 PE=2 SV=1	1546.59	425.864	1272.86	1084.88	2940.5	5149.26	7179.41	9222.93	2470.03	2464.77	1617.11	1043.43	458.446	2762.29	924.148	1055.33	690.894	854.075	4884.07	8288.83	2427.8	3285.75	352.987	2754.71	5258.02	2051.99	3945.91	2373.11	1154.97	3674.64	3146.11	3236.41	4063.35	4780.22	2287.27	297.159	4219.45	9279.93	1152.88	12464.8	5313.39	487.789	128.383	127.067	436.773	2231.3	1861.56
565	tr|A0A5C2FYH6|A0A5C2FYH6_HUMAN	IGL c2011_light_IGKV1D-33_IGKJ4 (Fragment) OS=Homo sapiens OX=9606 PE=2 SV=1	731.506	396.615	471.322	600.585	1026.91	1403.56	1667.46	1029.94	185.531	400.188	676.623	677.82	289.295	2293.68	230.868	599.599	592.146	383.503	835.6	1388.75	318.188	1351.78	480.123	841.001	430.582	151.567	536.666	263.255	276.742	447.779	480.551	708.126	223.879	1079.38	343.119	362.861	91.6452	370.347	198.744	770.578	463.624	244.967	594.251	631.703	419.71	199.122	414.179
566	tr|A0A5C2GBU1|A0A5C2GBU1_HUMAN	IGH + IGL c108_light_IGKV2-28_IGKJ2 (Fragment) OS=Homo sapiens OX=9606 PE=2 SV=1	9813.43	4786.21	6886.83	2644.38	14542.2	2222.04	11491.5	5888.74	1748.11	1086.04	7339.46	2775.24	10750.9	5360.44	2068.14	1722.6	4419.76	434.009	12587.7	3206.69	3814.87	8046.95	7846.45	3435.12	1843.46	5582.41	4974.28	6316.83	4710.17	2880.67	2914.83	7141.43	10259.7	8679.38	1450.9	1390.12	7082.99	5707.54	5868.45	5041.37	1580.81	3733.75	4052.19	2570.16	2535.69	1814.05	2801.96
567	tr|A0A5C2GT20|A0A5C2GT20_HUMAN	IG c1854_heavy_IGHV3-23_IGHD3-3_IGHJ6 (Fragment) OS=Homo sapiens OX=9606 PE=2 SV=1	2789.24	3308.94	2721.75	6007.06	9341.43	8157	3646.31	579.163	673.124	1772.9	3579.26	2466.95	5079.67	3241.67	1080.36	4288.61	1040.29	768.089	3655.02	4459.41	2375.2	4114.26	756.016	3462.41	2726	6060.87	741.304	640.789	1847.76	191.744	6143.4	269.639	6995.81	7027.31	1139.32	147.816	5862.03	7694.14	3526.36	5341.34	446.984	1737.5	140.926	1168	2069.99	4181.95	939.956
568	tr|A0A5C2GPF5|A0A5C2GPF5_HUMAN	IG c1256_heavy_IGHV3-23_IGHD3-3_IGHJ6 (Fragment) OS=Homo sapiens OX=9606 PE=2 SV=1	434.42	322.512	1241.38	2765.55	1614.65	715.627	774.432	1204.5	983.723	466.489	1528.23	390.182	5589.91	1356.9	7078.51	5301.96	143.416	5939.44	715.002	3912.63	4643.5	497.913	1169.02	601.828	1025.79	773.787	861.45	906.897	490.688	1118.82	6455.74	87.6436	1717.78	3621.85	3502.78	2948.47	2095.38	1232.17	1056.71	1328.34	469.245	936.036	211.199	272.78	173.187	1775.95	481.355
569	tr|A0A5C2G2B7|A0A5C2G2B7_HUMAN	IGL c3428_light_IGLV3-25_IGLJ2 (Fragment) OS=Homo sapiens OX=9606 PE=2 SV=1	1908.28	1158.12	3240.91	6987.12	821.604	1792.59	1881.96	1473.08	1862.99	2276.39	2219.56	1602.83	1574.92	1673.17	1057.61	1521.5	772.175	632.96	1289.91	3386.71	1703.76	1460.16	1907.75	3142.09	1945.05	1759.67	2254.82	1564.91	1444.62	2543.99	1149.98	2544.83	2656.59	1484.44	1739.95	1415.09	1279.52	2892.28	2375.4	1606.39	4526.38	2594.72	1492.89	2409.02	2522.07	13755.6	2601.71
570	tr|A0A5C2G678|A0A5C2G678_HUMAN	IGL c1903_light_IGLV3-27_IGLJ3 (Fragment) OS=Homo sapiens OX=9606 PE=2 SV=1	477.733	1162.85	1005.86	1534.76	1310.62	1354.99	2632.17	2614.54	2064.46	2677.23	1027.76	387.011	5188.82	6226.17	688.605	581.005	292.071	713.553	1552.46	2163.14	439.383	1128.47	1784.51	544.311	1977.48	296.732	1090.39	1341.26	1900.53	1376.3	2122.68	2361.79	139.221	1764.97	401.922	346.59	1295.82	400.825	2061.18	1930.33	1040.95	615.2	1296.26	2150.32	1561.83	1804.83	397.738
571	tr|A0A5C2GN30|A0A5C2GN30_HUMAN	IG c862_heavy_IGHV3-9_IGHD2-21_IGHJ3 (Fragment) OS=Homo sapiens OX=9606 PE=2 SV=1	3174.46	164.818	325.874	940.063	1487.42	892.592	1216.23	481.415	1531.82	2142.12	867.397	880.425	712.745	995.771	2021.42	554.9	400.612	800.492	2345.95	1867.58	2207.26	1797.2	3358.07	2295.59	1779.61	1895.11	3558.28	2076.26	384.252	378.74	3066.31	3249.66	1426.54	1191.7	2555.27	1984.41	835.973	556.674	1942.85	2182.38	4232.94	3246.34	183.426	2266.2	662.64	1195.31	3808.32
572	tr|A0A5C2G7R2|A0A5C2G7R2_HUMAN	IGL c3747_light_IGLV2-8_IGLJ2 (Fragment) OS=Homo sapiens OX=9606 PE=2 SV=1	13532.9	14231	15879.5	13389.9	10414.1	10441.1	36185.3	34632.8	10544	12820.8	24792.4	26689	25004.7	25390.4	9937.42	11618.3	10692.4	11339.3	38306.3	37856.3	17851.6	19845.6	38838.8	35579	39104.5	39143.1	38111.1	36661.1	28903.7	29180.7	29801.9	33322	32884.1	32264.6	26998.4	23446.6	28824.3	25252.1	15958.5	16139.4	34656.7	32569.8	32502	29860.5	31840.7	442795	436312
573	tr|J3KSE5|J3KSE5_HUMAN	Coiled-coil domain-containing protein 103 (Fragment) OS=Homo sapiens OX=9606 GN=CCDC103 PE=1 SV=1	1455.21	3216.35	6610.77	2801.23	358.112	371.834	706.124	373.334	1338.78	701.069	1993.64	1600.05	2110.81	2296.95	219.675	282.589	152.108	347.003	913.115	3853.33	313.721	185.373	524.247	268.972	2172.32	502.202	1283.96	183.693	521.907	5986.2	814.517	1769.41	1587.94	883.911	1193.23	669.797	233.339	1879.82	771.254	1313.66	1667.79	1360.05	584.432	2141.74	465.096	9737.22	15970.5
574	tr|A0A7S5EWB3|A0A7S5EWB3_HUMAN	IGH c1922_heavy_IGHV3-23_IGHD3-9_IGHJ3 (Fragment) OS=Homo sapiens OX=9606 PE=2 SV=1	564.652	2767.23	168.915	945.577	3131.13	5157.16	8820.33	8997.29	2157.67	1625.75	2718.24	926.189	2145.59	910.604	975.262	442.225	43.1535	1357.91	1505.29	510.515	1300.83	3899.75	1428.53	970.319	2777.31	4473.53	705.195	936.56	1965.73	3134.22	727.823	482.039	1923.32	3591.07	95.7435	2001.57	3613.17	4486	2202.47	3529.08	1448.87	596.176	1059.38	995.331	1433.87	865.939	1153.86
575	tr|A0A7S5EWB4|A0A7S5EWB4_HUMAN	IGH c288_heavy_IGHV3-48_IGHD4-17_IGHJ3 (Fragment) OS=Homo sapiens OX=9606 PE=2 SV=1	882.779	918.015	789.021	913.588	3117.66	3253.17	2020.9	3675.24	7698.99	6583.73	455.146	1232.67	2690.79	3062.11	434.547	894.168	961.145	419.972	432.801	625.004	115.489	503.007	426.978	1457.52	3011.28	2402.26	2132.95	1482.53	1869.87	1325.37	2499.11	2204.56	2604.21	2592.47	1454.53	1781.07	4888.29	4957.65	2105.49	1891.77	419.57	221.689	945.115	500.95	715.905	2011.12	1706.77
576	tr|A0A5C2GUT4|A0A5C2GUT4_HUMAN	IG c1191_light_IGKV1-33_IGKJ2 (Fragment) OS=Homo sapiens OX=9606 PE=2 SV=1	5300.67	2894.79	2158.93	113.629	558.08	1379.37	1259.34	2357.64	1498.56	1758.61	722.982	250.99	796.444	885.521	784.899	624.573	570.102	208.206	483.815	413.453	1103.99	1676.34	1102.28	333.113	1575.92	225.953	107.294	278.667	718.08	443.462	1374.38	206.051	634.211	983.505	1222.36	1154.99	959.208	477.447	2797.73	2322.33	141.124	158.231	137.262	774.23	292.703	1040.52	1733.34
577	tr|A0A5C2FVB4|A0A5C2FVB4_HUMAN	IGL c988_light_IGLV2-23_IGLJ1 (Fragment) OS=Homo sapiens OX=9606 PE=2 SV=1	2416.89	2768.03	1321.76	1343.39	259.948	1341.94	4039.31	3481.49	436.85	1747.05	2757.85	3163.65	4938.79	5976.21	450.746	1257.17	1041.08	1329.42	2507.87	2601.74	4751.84	6004.67	5109.32	5512.37	3036.29	3628.08	7234.25	8762.99	3988.04	3691.85	5827.99	5175.06	7930.92	8483.22	5619.35	6454.03	4695.95	4347.81	8009.29	9657.44	443.757	1578.71	1161.18	2635.71	2247.41	3563.33	1550.76
578	tr|Q0ZCH9|Q0ZCH9_HUMAN	Immunglobulin heavy chain variable region (Fragment) OS=Homo sapiens OX=9606 PE=4 SV=1	11207.8	8427.12	6191.31	6151.1	6113.34	8624.22	24242.3	21315.1	12976.2	11115.6	5172.63	1995.52	5460.53	8578.96	6783.14	2234.03	4043.47	2203.79	8426	8314.06	10002.8	12684.6	13224	15717.6	13183.5	16123.2	13980.6	12576.2	3204.77	1295.3	8206.05	6897.4	11271.8	10137.3	8005.09	6453.3	14335.4	15398.3	5939.03	8997.84	5927.65	5248.64	5858.81	2689.25	4813.7	36779.7	38444.3
580	tr|A0A5C2GIT4|A0A5C2GIT4_HUMAN	IG c17_heavy_IGHV5-51_IGHD5-12_IGHJ6 (Fragment) OS=Homo sapiens OX=9606 PE=2 SV=1	186.585	1175.86	548.477	281.492	287.649	40.7274	120.576	614.544	2235.77	4217.59	188.176	255.028	665.849	1185.98	41.709	96.722	94.816	215.113	907.501	1246.19	340.764	244.202	1364.6	432.934	313.455	426.259	790.749	390.601	137.811	232.584	1661.05	1734.11	417.135	359.824	14048.7	15006.1	6370.93	6010.07	286.35	555.195	125.143	174.069	213.113	0	414.449	449.826	449.414
581	tr|A0A5C2G485|A0A5C2G485_HUMAN	IGL c2277_light_IGLV2-14_IGLJ1 (Fragment) OS=Homo sapiens OX=9606 PE=2 SV=1	2637.42	3365.86	3403.34	4211.3	7086.3	5848.14	1502.99	1839.73	1280.46	2185.03	3572.95	2894.15	3751.61	3753.37	1033.49	800.667	5994.05	6889.83	5672.01	2200.76	1167.65	844.894	6469.21	6812.83	2137.26	3471.72	4398.68	5085.52	1157.09	1384.61	1824.21	2649.33	4535.37	3480.43	725.554	334.906	845.966	4625.29	1776.21	681.671	1939.11	1056.71	709.152	439.033	1422.66	4534.33	1277.94
582	tr|A0A5C2GQG5|A0A5C2GQG5_HUMAN	IG c984_heavy_IGHV3-30_IGHD3-9_IGHJ4 (Fragment) OS=Homo sapiens OX=9606 PE=2 SV=1	1253.75	1361.29	589.444	1477.39	338.899	1854.56	2682.9	1702.44	1051.48	2000.96	1241.28	291.201	1349.74	1288.84	361.051	884.967	1521.98	364.651	770.033	2172.64	1927.88	454.94	1314.92	758.661	1114.96	1506.93	1927.42	1969.81	970.664	1188.15	1129.11	1430.8	89.7627	3054.57	1363.84	676.774	2403.34	1416.94	691.859	562.966	892.135	1525.71	135.157	1252.15	809.15	1330.65	2309.29
583	tr|A0A7S5C577|A0A7S5C577_HUMAN	IGH c3575_heavy_IGHV4-59B_IGHD2-21_IGHJ4 (Fragment) OS=Homo sapiens OX=9606 PE=2 SV=1	889.378	497.26	427.223	341.258	953.879	1227.81	981.355	1470.36	651.74	1602.98	697.79	762.604	299.681	229.548	9026.06	7885.06	586.918	648.942	9981.22	813.088	1402.65	653.736	588.238	380.729	941.904	718.627	480.128	411.266	399.038	144.637	842.769	2529.42	926.181	1387.76	96.1163	950.079	1493.78	1110.75	416.852	962.355	321.035	217.933	168.957	407.856	172.849	434.956	1776.48
584	tr|A0A5C2FZ22|A0A5C2FZ22_HUMAN	IGL c517_light_IGKV1-39_IGKJ2 (Fragment) OS=Homo sapiens OX=9606 PE=2 SV=1	3573.11	1986.93	25264.9	27141.4	2786.17	6347.32	786.262	11145.5	7444.96	1627.77	3009.76	3669.99	2813.64	3033.69	347.799	428.733	1849.65	746.621	1454.21	4694.63	1967.38	6693.76	2398.77	1875.66	669.135	1596.46	1379.62	519.305	2325.71	1778.57	7493.86	9631.44	7773.33	6278.08	6313.61	5024.62	888.973	10225.1	6354.67	5615.2	1375.66	1148.37	1673.93	837.329	494.971	274.795	1944.29
585	tr|A0A5C2FVI2|A0A5C2FVI2_HUMAN	IGL c1041_light_IGLV2-14_IGLJ1 (Fragment) OS=Homo sapiens OX=9606 PE=2 SV=1	1516.24	1225.84	1835.67	268.376	1085.02	184.673	2763.87	3273.6	1516.01	2157.09	1908.74	1943.81	1259.05	185.185	587.469	903.946	935.692	1198.46	1725.49	1171.41	2637.94	3727.72	5130.63	5846.28	1158.25	389.538	2149.89	4664.06	3516.41	4032.57	4271.77	4315.67	9142.57	9463.04	3743.25	3417.27	3081.1	160.077	275.681	2566.82	3649.86	3957.49	4322.91	3568.03	4514.67	34935	31000.3
586	tr|A0A7S5EU90|A0A7S5EU90_HUMAN	IGH c1786_heavy_IGHV1-18_IGHD6-19_IGHJ4 (Fragment) OS=Homo sapiens OX=9606 PE=2 SV=1	1000.52	1912.95	5984.82	6747.48	3769.87	6606.18	860.905	1330.02	264.815	717.31	620.748	1800.5	3041.1	5754.81	910.632	2186.46	2889.67	2285.75	5282.36	3103.37	4175.1	1849.1	7336.4	2708.81	1486.98	2797.59	796.455	3549.38	1388.94	4520.46	10400	2646.46	980.69	277.715	4302.77	1467.79	1915.72	2796.52	4718.4	5330.85	1327.56	131.607	3057.21	750.267	5567.18	2713.95	5097.71
587	tr|A0A5C2GDG0|A0A5C2GDG0_HUMAN	IG c1087_heavy_IGHV1-69_IGHD4-23_IGHJ6 (Fragment) OS=Homo sapiens OX=9606 PE=2 SV=1	966.236	1120.22	257.362	903.962	115.882	1098.39	370.234	1721.69	5501.76	4881.9	3973.99	3287.87	1901.67	901.973	21211.7	26549.7	240.463	1687.42	4594.65	6096.85	2496.3	2134.53	2133.65	1417.36	1744.42	1531.78	2480.15	2413.85	841.842	2283.11	13111.9	13059.4	4992.69	5300.63	1092.96	1820.95	3407.8	2162.78	4908.35	683.54	605.985	228.83	346.747	638.591	534.091	917.771	2079.09
588	tr|A0A5C2GRX7|A0A5C2GRX7_HUMAN	IG c47_light_IGLV1-40_IGLJ1 (Fragment) OS=Homo sapiens OX=9606 PE=2 SV=1	192.123	845.15	141.003	5557.82	796.334	435.409	8896.73	229.232	308.104	8203.86	418.166	151.747	5142.65	5758.12	228.544	2740.6	593.237	344.369	847.461	392.203	266.336	6371.28	8680.59	628.588	1256.11	5512.11	845.964	565.94	545.848	780.545	1193.92	772.674	11946.2	2086.77	7089.28	5423.11	6932.09	1110.64	588.86	9700.61	2891.82	152.406	2197.84	3865.48	2729.1	7819.29	8124.67
589	tr|A0A5C2G6I4|A0A5C2G6I4_HUMAN	IGL c2033_light_IGKV3-11_IGKJ4 (Fragment) OS=Homo sapiens OX=9606 PE=2 SV=1	1189.91	803.779	624.972	575.435	1593.03	2087.97	1796.17	1384.15	13425.1	13502.7	6159	790.821	749.7	166.231	861.021	2004.18	2898.3	449.817	6975.21	2322.76	2463.36	3885.08	464.467	2153.93	1884.47	1363.85	706.514	1957.93	683.582	926.266	3359.87	274.348	3295.31	3014.51	2501.92	2991.73	2688.2	1065.4	4723.37	1781.35	6172.18	983.868	546.112	1004.27	486.966	7522.37	590.128
590	tr|A0A650F0N3|A0A650F0N3_HUMAN	Beta-globin (Fragment) OS=Homo sapiens OX=9606 PE=3 SV=1	61342.5	53569.1	43593.4	47850.2	1.20482e+06	1.27944e+06	28684.6	27674.6	103809	103434	90774.3	98855.8	48485.4	49934.6	45080.6	45422	15123.5	19387.8	20220.6	17006.6	189396	196330	142250	141433	846484	838810	222261	213861	224308	208403	1.18281e+06	1.16274e+06	49299.5	51546.1	968431	902144	173951	164122	45450.6	43588.2	87077.2	80075.3	81537.3	81903.6	80397.7	32151.6	30257
591	tr|A0A7S5BZA1|A0A7S5BZA1_HUMAN	IGH c1041_heavy_IGHV3-48_IGHD3-22_IGHJ4 (Fragment) OS=Homo sapiens OX=9606 PE=2 SV=1	684.349	618.554	612.34	392.482	1020.9	2056.03	171.755	1791.74	385.473	1393.39	1339.05	576.432	1020.2	319.037	230.862	2361.57	1505.18	150.678	2473.64	498.17	537.36	1090.54	813.317	1558.97	1125.3	474.423	1070.01	664.646	502.044	1266.38	517.1	983.562	654.549	1236.19	307.826	547.198	241.907	1016.42	694.583	619.344	12980.1	10610.1	11847.7	8292.92	13344.1	15365.9	12656.9
592	tr|A0A5C2GS77|A0A5C2GS77_HUMAN	IG c1524_heavy_IGHV3-21_IGHD6-19_IGHJ6 (Fragment) OS=Homo sapiens OX=9606 PE=2 SV=1	1877.05	1065.36	2384.75	6584.31	2249.26	2450.19	2578.91	3883.83	2582.85	4066.08	2086.96	2805.96	1454.56	1361.09	1890.8	1704.49	1741.29	3430.6	2253.23	4887.65	1788.2	6292.38	1167.32	1176.92	3406.42	2146.85	376.725	1446.77	3227.91	157.26	2161.45	1762.98	2701.62	2941.92	1829.9	76.6536	4919.57	4608.34	546.158	1621.24	485.981	790.879	1171.43	718.755	1187.12	18895.6	20061.1
593	tr|A0A7S5C1U8|A0A7S5C1U8_HUMAN	IGH c2663_heavy_IGHV5-51_IGHD3-10_IGHJ4 (Fragment) OS=Homo sapiens OX=9606 PE=2 SV=1	2057.6	630.059	1301.05	1493.01	1628.34	407.851	2903.61	238.172	492.998	272.898	330.329	1428.72	246.44	239.559	3836.9	2583.14	373.913	1624.02	4765.63	2672.61	575.097	2322.13	1362.68	132.991	138.956	2086.23	523.141	1153.87	1107.31	259.542	444.721	634.381	1324.91	498.837	635.357	2203.86	2646.09	1027.63	636.506	2684.28	646.824	199.914	850.491	466.867	532.347	6592.95	345.927
594	tr|A0A7S5C2T2|A0A7S5C2T2_HUMAN	IGH c2915_heavy_IGHV1-69_IGHD3-22_IGHJ3 (Fragment) OS=Homo sapiens OX=9606 PE=2 SV=1	1332.19	387.65	1507.32	3499.58	886.876	2365.79	1417.06	1207.6	4571.08	2011.36	1060.12	383.176	301.745	303.071	422.818	600.4	620.904	380.115	1759.26	1543.22	1493.93	1807.43	655.489	729.913	109.607	1794.54	1486.76	1667.7	1054.25	1005.65	16852.2	15637.2	387.906	1698.55	11918.5	10769	700.001	3625.39	1471.69	1025.84	1536.18	973.172	867.354	763.14	1260.07	1608.81	781.47
595	tr|A0A5C2GDE3|A0A5C2GDE3_HUMAN	IGH + IGL c603_light_IGKV3-11_IGKJ5 (Fragment) OS=Homo sapiens OX=9606 PE=2 SV=1	4551.32	4654.81	2248.01	3137.77	5997.22	4908.01	10742.4	8606.21	8421.14	9583.34	3128.32	3782.31	2361.94	1800.69	5840.69	3901.83	2544.25	2650.61	12843.1	15250.7	6090.16	6539.86	13854.6	11018.3	248.676	4351.15	22404.1	20644.1	5447.9	2521.51	7008.52	9788.94	4549.91	3099.51	2389.41	3778.56	17343.2	10627.9	2476.46	2835.95	2024.57	1569.52	1165.13	2009.73	340.024	12682.6	1254.29
596	tr|Q59G97|Q59G97_HUMAN	EGF-containing fibulin-like extracellular matrix protein 1 isoform b variant (Fragment) OS=Homo sapiens OX=9606 PE=4 SV=1	1919.78	2794.21	1196.98	1605.96	4784.95	3959.27	2451.76	3957.03	3478.74	808.647	3126.87	2506.18	862.728	1506.45	2324.15	2234.4	1023.89	1678.93	3002.09	3377.84	1675.52	1807.1	1474.72	3013.58	1939.09	2966.01	2099.68	487.536	3018.54	1517.37	5571.41	4702.82	3355.58	5658.26	4285.29	2446.56	7493.5	8327.79	2187.99	3316.4	1344.03	1354.95	904.988	2059.5	1324.41	3077.2	3219.77
597	tr|A0A5C2FYG7|A0A5C2FYG7_HUMAN	IGL c1216_light_IGKV3-20_IGKJ2 (Fragment) OS=Homo sapiens OX=9606 PE=2 SV=1	329.375	2356.18	2147.05	2363.35	2353.35	1496.07	1744.25	1089.07	487.805	1427.23	2305.46	3446.08	480.174	386.08	2408.67	3411.37	2537.13	3185.75	619.546	403.021	503.772	408.842	3578.47	402.515	1542.46	2071.24	597.672	966.135	565.866	208.901	3760.43	3481.33	1218.09	1724.87	151.157	2017.28	3414.91	666.842	1414.28	442.911	1573.31	642.209	325.761	317.155	205.68	732.177	263.771
598	tr|A0A7S5EYK2|A0A7S5EYK2_HUMAN	IGH c4019_heavy_IGHV3-23_IGHD2-21_IGHJ6 (Fragment) OS=Homo sapiens OX=9606 PE=2 SV=1	250056	220109	390626	411912	601488	657397	637301	628149	206409	212023	372612	382974	404893	420123	54221.4	51791.9	55566.5	59658.7	278810	247947	128571	131261	265556	272337	631716	592084	154465	151591	165889	170063	406164	399546	354148	344142	148199	141796	256624	234762	374877	415872	168568	142701	163920	148192	159619	907425	808409
599	tr|A0A5C2FWZ7|A0A5C2FWZ7_HUMAN	IGL c1194_light_IGKV3-11_IGKJ4 (Fragment) OS=Homo sapiens OX=9606 PE=2 SV=1	857.001	6794.58	6132.39	7170.92	9920.2	13325.4	4661.81	10591.9	9764.59	12375.6	6354.45	10117	2393.48	4283.7	666.539	2500.58	3966.11	674.705	9427.51	2074.63	4121.3	8767.78	4439.11	7490.13	10222	10949.3	6605.55	7991.32	5245.55	6793.13	6114.46	6372.45	6428.98	13140	4510.71	5221.25	7036.27	8421.39	8831.26	7509.44	739.732	201.72	2071.28	3925.93	1415.24	16181.5	15274.8
600	tr|A0A5C2GG30|A0A5C2GG30_HUMAN	IG c723_heavy_IGHV4-39_IGHD6-6_IGHJ3 (Fragment) OS=Homo sapiens OX=9606 PE=2 SV=1	9176.18	415.406	473.385	261.813	535.115	1718.37	493.326	551.616	571.025	456.123	8637.54	7205.08	6110.46	1234.14	4715.45	5043.54	4217.64	201.192	5614.68	8738.57	9672	9495.05	745.032	969.598	7704.45	821.16	335.023	8791.53	452.916	962.027	510.127	2471.05	1152.09	1134.03	412.717	114.877	5378.78	2941	276.108	803.95	250.294	305.962	2245.21	489.758	168.841	6140.25	2820.86
601	tr|A0A7S5C1T3|A0A7S5C1T3_HUMAN	IGH c1790_heavy_IGHV4-39_IGHD6-13_IGHJ4 (Fragment) OS=Homo sapiens OX=9606 PE=2 SV=1	632.242	3523.69	3154.14	4188.65	11147.4	10683.6	1653.02	1564.21	16259.5	23314.8	15552.3	4294.03	3828.96	664.535	2244.57	8046.39	2438.95	1909.93	2854.5	7220.38	2025.06	7449.88	1514	407.355	2497.8	582.472	849.405	3521.86	7783.78	628.773	207.367	3711.37	1305.28	10095.2	8818.51	1899.75	3058.37	18170.8	18464.6	1330.66	1616.71	816.783	876.285	1555.16	0	3736.13	7365.79
[truncated: 3 more columns]

## Sheet: A vs C
					Asymptomatic	Control (PCR-)
Row	Peak Name	Group	t-value	p-value	Mean 1	Mean 2	Median 1	Median 2	Sigma 1	Sigma 2	Delta	Fold Change	Log (Fold Change)
1	tr|A0A5C2H3L0|A0A5C2H3L0_HUMAN	IG c1606_light_IGKV4-1_IGKJ2 (Fragment) OS=Homo sapiens OX=9606 PE=2 SV=1	5.96725	1.2053e-05	18543.1	6212.94	16382.8	6540.86	5820.06	2970.3	12330.1	2.98458	0.474884
2	tr|A0A7S5EW92|A0A7S5EW92_HUMAN	IGH c228_heavy_IGHV4-39_IGHD7-27_IGHJ3 (Fragment) OS=Homo sapiens OX=9606 PE=2 SV=1	5.90471	1.3707e-05	23750.1	14733	23762.8	16568.3	2050.57	4372.14	9017.11	1.61204	0.207375
3	tr|A0A5C2GIS3|A0A5C2GIS3_HUMAN	IG c768_heavy_IGHV4-61_IGHD6-19_IGHJ6 (Fragment) OS=Homo sapiens OX=9606 PE=2 SV=1	5.63328	2.4088e-05	22698.6	13991.5	22663.5	15292	2091.61	4417.66	8707.11	1.62231	0.210135
4	tr|B4E1B2|B4E1B2_HUMAN	Beta-1 metal-binding globulin OS=Homo sapiens OX=9606 PE=2 SV=1	4.89261	0.00012	264028	666.485	287375	527.15	170220	365.737	263362	396.15	2.59786
5	tr|A0A5C2G703|A0A5C2G703_HUMAN	IGL c168_light_IGKV1-12_IGKJ5 (Fragment) OS=Homo sapiens OX=9606 PE=2 SV=1	4.84617	0.00013	45993.3	22330.6	46169.5	21567.9	12269.6	9373.89	23662.7	2.05965	0.313793
6	tr|A0A5C2GUV5|A0A5C2GUV5_HUMAN	IG c297_heavy_IGHV3-33_IGHD3-16_IGHJ6 (Fragment) OS=Homo sapiens OX=9606 PE=2 SV=1	4.80968	0.00014	8944.89	1251.29	9155.21	865.549	4838.83	1474.17	7693.61	7.14856	0.854219
7	tr|Q96K68|Q96K68_HUMAN	cDNA FLJ14473 fis, clone MAMMA1001080, highly similar to Homo sapiens SNC73 protein (SNC73) mRNA OS=Homo sapiens OX=9606 PE=2 SV=1	4.41204	0.00034	25378.1	16141.8	26564	17895.2	4979.49	4362.24	9236.31	1.5722	0.196507
8	tr|A0A7S5EWY8|A0A7S5EWY8_HUMAN	IGH c2657_heavy_IGHV3-21_IGHD3-9_IGHJ6 (Fragment) OS=Homo sapiens OX=9606 PE=2 SV=1	4.38409	0.00036	20302.9	9927.98	19896.2	8406.64	6545.33	3627.87	10374.9	2.04502	0.310697
9	tr|A0A0S2Z3Y1|A0A0S2Z3Y1_HUMAN	Galectin-3-binding protein (Fragment) OS=Homo sapiens OX=9606 GN=LGALS3BP PE=2 SV=1	4.28116	0.00045	68541.2	27508.2	64473.8	25978.8	28913.6	9090.57	41033	2.49166	0.39649
10	tr|V9HWP0|V9HWP0_HUMAN	Pentaxin OS=Homo sapiens OX=9606 GN=HEL-S-92n PE=2 SV=1	4.13595	0.00062	273665	142237	255150	156381	87365.8	49647.6	131427	1.924	0.284205
11	tr|A0A5C2GR37|A0A5C2GR37_HUMAN	IG c1363_heavy_IGHV3-33_IGHD3-16_IGHJ4 (Fragment) OS=Homo sapiens OX=9606 PE=2 SV=1	3.98098	0.00088	17226.2	6578.71	16255.1	6180.18	7429.1	4042.59	10647.5	2.61847	0.418048
12	tr|A0A024R6I7|A0A024R6I7_HUMAN	Alpha-1-antitrypsin OS=Homo sapiens OX=9606 GN=SERPINA1 PE=1 SV=1	3.96755	0.0009	2.35101e+06	634299	2.05529e+06	601658	1.28343e+06	474343	1.71671e+06	3.70647	0.56896
13	tr|A0A5C2FZ03|A0A5C2FZ03_HUMAN	IGL c497_light_IGKV1D-17_IGKJ1 (Fragment) OS=Homo sapiens OX=9606 PE=2 SV=1	3.91867	0.00101	3940.15	634.482	3432.42	612.318	2659.91	202.341	3305.67	6.21003	0.793093
14	sp|P0DOX3|IGD_HUMAN	Immunoglobulin delta heavy chain OS=Homo sapiens OX=9606 PE=1 SV=1	3.76856	0.00141	38605.4	13471.5	40707.9	14508.8	20417	5286.5	25133.9	2.8657	0.457231
15	tr|A0A5C2GVC0|A0A5C2GVC0_HUMAN	IG c802_light_IGKV3-20_IGKJ5 (Fragment) OS=Homo sapiens OX=9606 PE=2 SV=1	3.75624	0.00145	7377.26	3046.44	6484.37	2073	2522.95	2632.11	4330.82	2.4216	0.384103
16	tr|A0A5C2G0W4|A0A5C2G0W4_HUMAN	IGL c2799_light_IGKV3D-20_IGKJ2 (Fragment) OS=Homo sapiens OX=9606 PE=2 SV=1	3.53379	0.00237	100947	52536.6	118348	58355	38729.9	19409.3	48410.7	1.92147	0.283633
17	tr|A0A5C2GMZ5|A0A5C2GMZ5_HUMAN	IG c855_heavy_IGHV3-23_IGHD1-26_IGHJ1 (Fragment) OS=Homo sapiens OX=9606 PE=2 SV=1	3.52365	0.00243	4803.02	1289.2	5037.2	724.985	3000.05	971.57	3513.82	3.72558	0.571193
18	tr|K7ERI9|K7ERI9_HUMAN	Apolipoprotein C-I (Fragment) OS=Homo sapiens OX=9606 GN=APOC1 PE=1 SV=1	-3.52135	0.00244	73876.2	199405	66565.9	219293	27907.4	109219	-125528	0.370484	-0.431231
19	tr|A0A5C2GPL4|A0A5C2GPL4_HUMAN	IG c520_heavy_IGHV4-34_IGHD3-16_IGHJ4 (Fragment) OS=Homo sapiens OX=9606 PE=2 SV=1	3.50158	0.00255	18538.8	7666.39	20278.6	7465.73	8411.02	5066.07	10872.4	2.41819	0.383491
20	tr|A0A7S5C6Y2|A0A7S5C6Y2_HUMAN	IGH c3385_heavy_IGHV5-51_IGHD5-24_IGHJ2 (Fragment) OS=Homo sapiens OX=9606 PE=2 SV=1	3.47929	0.00268	2217.77	994.985	1989.67	866.733	897.894	654.932	1222.79	2.22895	0.3481
21	tr|A0A5C2GRR4|A0A5C2GRR4_HUMAN	IG c101_light_IGKV6D-21_IGKJ1 (Fragment) OS=Homo sapiens OX=9606 PE=2 SV=1	3.4452	0.00289	2159.88	485.971	1997.73	456.966	1519.15	229.899	1673.91	4.44447	0.64782
22	tr|A0A5C2G0A9|A0A5C2G0A9_HUMAN	IGL c2592_light_IGKV1-12_IGKJ5 (Fragment) OS=Homo sapiens OX=9606 PE=2 SV=1	3.43411	0.00296	81569.2	52064.2	80803.7	50301	21298.7	16868.6	29505	1.5667	0.194987
23	tr|A0A5C2GKP8|A0A5C2GKP8_HUMAN	IGH + IGL c617_light_IGKV1-33_IGKJ4 (Fragment) OS=Homo sapiens OX=9606 PE=2 SV=1	3.43161	0.00298	1582.99	488.163	1368.4	513.893	990.256	193.048	1094.83	3.24275	0.510913
24	sp|P05160|F13B_HUMAN	Coagulation factor XIII B chain OS=Homo sapiens OX=9606 GN=F13B PE=1 SV=3	3.35786	0.0035	28916.7	21481.4	29559.7	21741.9	4906.02	4996.18	7435.28	1.34613	0.129086
25	tr|A5PL27|A5PL27_HUMAN	CP protein OS=Homo sapiens OX=9606 GN=CP PE=2 SV=1	3.35755	0.00351	294837	208646	277319	216019	44960.7	67589.9	86190.9	1.4131	0.150172
26	tr|C9JXI5|C9JXI5_HUMAN	Transmembrane protein 198 (Fragment) OS=Homo sapiens OX=9606 GN=TMEM198 PE=1 SV=1	-3.30859	0.00391	2.99174e+06	7.93542e+06	3.18032e+06	7.20782e+06	1.02495e+06	4.61257e+06	-4.94368e+06	0.37701	-0.423647
27	sp|P02671|FIBA_HUMAN	Fibrinogen alpha chain OS=Homo sapiens OX=9606 GN=FGA PE=1 SV=2	3.30723	0.00392	31680.6	21919.7	32719.2	21155.6	7674.17	5311.79	9760.97	1.44531	0.15996
28	sp|P06727|APOA4_HUMAN	Apolipoprotein A-IV OS=Homo sapiens OX=9606 GN=APOA4 PE=1 SV=4	-3.29887	0.00399	191897	333900	203024	345502	65577	119286	-142003	0.574715	-0.240548
29	tr|A0A5C2G1W3|A0A5C2G1W3_HUMAN	IGL c3261_light_IGKV1-39_IGKJ1 (Fragment) OS=Homo sapiens OX=9606 PE=2 SV=1	3.2138	0.00481	173237	88580.8	144065	90895.7	79117.5	26060.3	84656	1.95569	0.291301
30	tr|A0A5C2GJU2|A0A5C2GJU2_HUMAN	IG c195_heavy_IGHV3-30_IGHD1-26_IGHJ4 (Fragment) OS=Homo sapiens OX=9606 PE=2 SV=1	-3.20857	0.00487	1501.46	5426.21	882.475	4876.23	1382.29	3612.7	-3924.75	0.276705	-0.557982
31	tr|A0A5C2FVL3|A0A5C2FVL3_HUMAN	IGL c216_light_IGKV3-20_IGKJ1 (Fragment) OS=Homo sapiens OX=9606 PE=2 SV=1	3.19705	0.00499	18117	8968.27	15089.6	9950.74	6647.03	6140.48	9148.74	2.02012	0.305378
32	tr|A0A5C2G6Z1|A0A5C2G6Z1_HUMAN	IGL c3467_light_IGKV3-15_IGKJ2 (Fragment) OS=Homo sapiens OX=9606 PE=2 SV=1	3.19394	0.00503	35815.3	16015.4	33071.9	16318.4	18619.1	6134.22	19799.8	2.2363	0.34953
33	tr|A0A7S5C4Y8|A0A7S5C4Y8_HUMAN	IGH c3967_heavy_IGHV3-11_IGHD1-26_IGHJ4 (Fragment) OS=Homo sapiens OX=9606 PE=2 SV=1	3.17337	0.00526	2132.11	1029.15	1921.01	814.752	899.562	631.508	1102.95	2.07171	0.316329
34	tr|A0A5C2GP46|A0A5C2GP46_HUMAN	IG c603_heavy_IGHV3-49_IGHD2-8_IGHJ4 (Fragment) OS=Homo sapiens OX=9606 PE=2 SV=1	3.13985	0.00566	5796.12	2474.99	7684.51	2512.04	2836.08	1773.33	3321.13	2.34187	0.369564
35	tr|A0A0A0MRJ7|A0A0A0MRJ7_HUMAN	Coagulation factor V OS=Homo sapiens OX=9606 GN=F5 PE=1 SV=1	3.13549	0.00572	18487.6	11456.2	17426.7	12070.1	5412.61	4581.72	7031.37	1.61376	0.207839
36	tr|A0A5C2GJF4|A0A5C2GJF4_HUMAN	IG c470_heavy_IGHV3-33_IGHD1-26_IGHJ4 (Fragment) OS=Homo sapiens OX=9606 PE=2 SV=1	3.07931	0.00647	3620.12	208.255	3119.83	233.172	3500.17	159.37	3411.87	17.3831	1.24013
37	tr|A0A384MEF1|A0A384MEF1_HUMAN	Actin-depolymerizing factor OS=Homo sapiens OX=9606 PE=2 SV=1	-2.99693	0.00774	159241	207753	164035	203837	28460.2	42547.6	-48512.2	0.766491	-0.115493
38	tr|V9HWF6|V9HWF6_HUMAN	Alpha-1-acid glycoprotein OS=Homo sapiens OX=9606 GN=HEL-S-153w PE=2 SV=1	2.99514	0.00777	3.05487e+06	2.08115e+06	3.22231e+06	2.03225e+06	865111	555410	973720	1.46788	0.16669
39	tr|A0A7S5C5A9|A0A7S5C5A9_HUMAN	IGH c3957_heavy_IGHV3-33_IGHD3-10_IGHJ6 (Fragment) OS=Homo sapiens OX=9606 PE=2 SV=1	2.99214	0.00782	41250.3	17709.3	31926.7	16198.7	21030.9	13292.9	23541.1	2.32931	0.367227
40	tr|A0A5C2GG30|A0A5C2GG30_HUMAN	IG c723_heavy_IGHV4-39_IGHD6-6_IGHJ3 (Fragment) OS=Homo sapiens OX=9606 PE=2 SV=1	-2.98459	0.00795	1465.24	5171.83	514.221	5329.11	2739	2814.48	-3706.59	0.283311	-0.547736
41	tr|A0A5C2G410|A0A5C2G410_HUMAN	IGL c4031_light_IGKV3-15_IGKJ1 (Fragment) OS=Homo sapiens OX=9606 PE=2 SV=1	2.95762	0.00843	21286.8	3961.91	22482.7	774.691	16603.1	8213.57	17324.9	5.37285	0.730205
42	tr|A0A5C2G9Y8|A0A5C2G9Y8_HUMAN	IGH + IGL c644_heavy_IGHV1-69_IGHD5-12_IGHJ4 (Fragment) OS=Homo sapiens OX=9606 PE=2 SV=1	2.95364	0.0085	8558.82	4947.83	9569.8	5070.46	3100.43	2309.5	3610.99	1.72981	0.237999
43	tr|A0A5C2GUT4|A0A5C2GUT4_HUMAN	IG c1191_light_IGKV1-33_IGKJ2 (Fragment) OS=Homo sapiens OX=9606 PE=2 SV=1	2.93386	0.00887	1927.96	574.099	1628.59	597.338	1440.58	232.814	1353.86	3.35824	0.526112
44	tr|A0A5C2GHK1|A0A5C2GHK1_HUMAN	IG c1179_light_IGLV3-21_IGLJ3 (Fragment) OS=Homo sapiens OX=9606 PE=2 SV=1	2.92888	0.00897	2043.2	1161.54	2346.88	1106.18	664.898	681.225	881.664	1.75905	0.245278
45	tr|A0A5C2G1N1|A0A5C2G1N1_HUMAN	IGL c2366_light_IGKV3-20_IGKJ1 (Fragment) OS=Homo sapiens OX=9606 PE=2 SV=1	2.89669	0.00961	5157.4	1541.09	4115.85	1257.26	3766.38	1183.28	3616.31	3.34659	0.524603
46	tr|Q0ZCH9|Q0ZCH9_HUMAN	Immunglobulin heavy chain variable region (Fragment) OS=Homo sapiens OX=9606 PE=4 SV=1	2.89666	0.00961	11636.4	5321.21	9869.89	5316.58	6363.53	2652.68	6315.19	2.1868	0.339808
47	sp|P23142|FBLN1_HUMAN	Fibulin-1 OS=Homo sapiens OX=9606 GN=FBLN1 PE=1 SV=4	2.89575	0.00963	23807.4	15884	26572.6	15622.2	7037.92	5033.57	7923.43	1.49883	0.175753
48	tr|A0A5C2G851|A0A5C2G851_HUMAN	IGL c547_light_IGKV4-1_IGKJ2 (Fragment) OS=Homo sapiens OX=9606 PE=2 SV=1	2.88584	0.00984	2932.16	972.275	2614.09	334.174	1895.56	1009.53	1959.89	3.01577	0.479398
49	tr|A0A7S5BZ69|A0A7S5BZ69_HUMAN	IGH c987_heavy_IGHV3-30_IGHD1-26_IGHJ4 (Fragment) OS=Homo sapiens OX=9606 PE=2 SV=1	2.86645	0.01026	1168.42	494.847	928.457	472.419	697.529	256.185	673.57	2.36117	0.373127
50	tr|B2R5G8|B2R5G8_HUMAN	Serum amyloid A protein OS=Homo sapiens OX=9606 PE=2 SV=1	2.86165	0.01037	15783.5	3128.76	11570.8	2099.13	13669.4	2949.91	12654.7	5.04464	0.702831
51	tr|A0A5C2GD80|A0A5C2GD80_HUMAN	IG c1148_heavy_IGHV1-2_IGHD2-15_IGHJ6 (Fragment) OS=Homo sapiens OX=9606 PE=2 SV=1	2.85985	0.01041	1361.47	586.924	1296.88	614.802	804.894	292.693	774.55	2.31968	0.365427
52	sp|P20851|C4BPB_HUMAN	C4b-binding protein beta chain OS=Homo sapiens OX=9606 GN=C4BPB PE=1 SV=1	2.85537	0.01051	53365.2	38720.5	55109.9	41326.7	14134.9	7953.25	14644.7	1.37822	0.139317
53	tr|A0A5C2GUK1|A0A5C2GUK1_HUMAN	IG c1101_light_IGKV1D-13_IGKJ1 (Fragment) OS=Homo sapiens OX=9606 PE=2 SV=1	2.84155	0.01083	12278.6	4618.48	9598.76	4105.02	8093.11	2677.97	7660.08	2.65857	0.424648
54	tr|C9JF17|C9JF17_HUMAN	Apolipoprotein D (Fragment) OS=Homo sapiens OX=9606 GN=APOD PE=1 SV=1	-2.83053	0.01109	90858.7	129116	83049.7	135989	27944.9	32340.8	-38257.6	0.703697	-0.152615
55	tr|A0A5C2GHU1|A0A5C2GHU1_HUMAN	IG c789_heavy_IGHV1-18_IGHD3-22_IGHJ3 (Fragment) OS=Homo sapiens OX=9606 PE=2 SV=1	-2.82966	0.01111	699.754	6320.7	589.996	5343.16	553.725	6257.22	-5620.94	0.110708	-0.95582
56	sp|P00747|PLMN_HUMAN	Plasminogen OS=Homo sapiens OX=9606 GN=PLG PE=1 SV=2	2.80561	0.0117	717222	565437	765674	526475	142444	94754.5	151785	1.26844	0.103269
57	tr|A0A2U8J8T6|A0A2U8J8T6_HUMAN	Ig heavy chain variable region (Fragment) OS=Homo sapiens OX=9606 GN=IgH PE=2 SV=1	-2.80463	0.01172	1707.25	3725.3	1484.17	3321.3	1082.73	2001.27	-2018.05	0.458286	-0.338863
58	tr|A0A7T0PXM4|A0A7T0PXM4_HUMAN	Immunglobulin kappa chain variable region (Fragment) OS=Homo sapiens OX=9606 PE=2 SV=1	2.78871	0.01213	37360.7	19100.3	44862.7	19044.2	19133.3	7916.87	18260.4	1.95603	0.291375
59	sp|P04003|C4BPA_HUMAN	C4b-binding protein alpha chain OS=Homo sapiens OX=9606 GN=C4BPA PE=1 SV=2	2.73056	0.01373	68174.3	48235.3	78229.6	48118	21926.4	7242.07	19939	1.41337	0.150256
60	tr|A0A5C2GER5|A0A5C2GER5_HUMAN	IG c1063_heavy_IGHV3-33_IGHD1-1_IGHJ3 (Fragment) OS=Homo sapiens OX=9606 PE=2 SV=1	2.73069	0.01373	2808.88	786.348	2105.7	682.734	2282.2	526.756	2022.53	3.57206	0.552919
61	tr|A0A7S5C2T2|A0A7S5C2T2_HUMAN	IGH c2915_heavy_IGHV1-69_IGHD3-22_IGHJ3 (Fragment) OS=Homo sapiens OX=9606 PE=2 SV=1	2.71913	0.01407	1918.65	737.483	1462.19	511.609	1265.88	533.392	1181.17	2.60162	0.415244
62	tr|A0A5C2GAN8|A0A5C2GAN8_HUMAN	IGL c492_light_IGLV3-21_IGLJ1 (Fragment) OS=Homo sapiens OX=9606 PE=2 SV=1	2.71464	0.0142	454.583	185.889	388.84	171.215	284.752	129.942	268.693	2.44545	0.388358
63	tr|A0A7T0PY07|A0A7T0PY07_HUMAN	Immunglobulin kappa chain variable region (Fragment) OS=Homo sapiens OX=9606 PE=2 SV=1	2.68528	0.01512	10035.7	6018.79	10588.3	7335.03	3452.36	3234	4016.94	1.6674	0.22204
64	tr|Q5VY30|Q5VY30_HUMAN	Retinol-binding protein OS=Homo sapiens OX=9606 GN=RBP4 PE=1 SV=2	-2.65803	0.01601	288530	455990	280670	450112	144188	137484	-167460	0.632755	-0.198764
65	tr|A0A7S5EUU9|A0A7S5EUU9_HUMAN	IGH c1395_heavy_IGHV4-59B_IGHD5-24_IGHJ5 (Fragment) OS=Homo sapiens OX=9606 PE=2 SV=1	2.6425	0.01655	3003.99	1732.58	2971.68	1404.11	1134.97	1013.3	1271.4	1.73382	0.239004
66	tr|A0A5C2GKT3|A0A5C2GKT3_HUMAN	IG c912_light_IGKV4-1_IGKJ5 (Fragment) OS=Homo sapiens OX=9606 PE=2 SV=1	2.63812	0.0167	2280.87	1140.72	2460.19	1199.54	1252.3	547.322	1140.15	1.9995	0.300922
67	tr|A0A5C2G978|A0A5C2G978_HUMAN	IGH + IGL c390_heavy_IGHV1-8_IGHD2-2_IGHJ5 (Fragment) OS=Homo sapiens OX=9606 PE=2 SV=1	2.62662	0.01711	8379.17	4353.48	7427.68	3889.54	4277.21	2279.38	4025.69	1.92471	0.284364
68	sp|P02750|A2GL_HUMAN	Leucine-rich alpha-2-glycoprotein OS=Homo sapiens OX=9606 GN=LRG1 PE=1 SV=2	2.62046	0.01734	43513.1	21515.4	33940.5	19363	21240.1	15923.1	21997.7	2.02242	0.30587
69	tr|A0A5C2GW60|A0A5C2GW60_HUMAN	IG c1795_light_IGKV3-15_IGKJ4 (Fragment) OS=Homo sapiens OX=9606 PE=2 SV=1	-2.61794	0.01743	2805.8	5530.04	2055.65	5583.5	2745.02	1814.77	-2724.24	0.507374	-0.294672
70	tr|A0A5C2GH52|A0A5C2GH52_HUMAN	IGH + IGL c65_heavy_IGHV5-51_IGHD5-24_IGHJ5 (Fragment) OS=Homo sapiens OX=9606 PE=2 SV=1	2.57907	0.01891	2606.02	1514.51	2531.29	1444.49	1008.02	880.36	1091.51	1.7207	0.235705
71	tr|D9ZGG2|D9ZGG2_HUMAN	Vitronectin OS=Homo sapiens OX=9606 GN=VTN PE=4 SV=1	2.5716	0.01921	1.27834e+06	1.04502e+06	1.35636e+06	1.11717e+06	203928	201819	233318	1.22327	0.0875212
72	tr|A0A7S5BZG2|A0A7S5BZG2_HUMAN	IGH c1146_heavy_IGHV3-33_IGHD3-10_IGHJ4 (Fragment) OS=Homo sapiens OX=9606 PE=2 SV=1	2.56002	0.01968	1128.87	485.791	959.153	418.892	717.083	341.784	643.083	2.32379	0.366196
73	sp|P43251|BTD_HUMAN	Biotinidase OS=Homo sapiens OX=9606 GN=BTD PE=1 SV=2	-2.5507	0.02007	12371.6	16499.7	11739	16923.8	4116.79	3040.43	-4128.06	0.74981	-0.125049
74	tr|Q68CK4|Q68CK4_HUMAN	Leucine-rich alpha-2-glycoprotein OS=Homo sapiens OX=9606 GN=HMFT1766 PE=2 SV=1	2.55008	0.0201	31829.7	9516.32	29102.1	7596.37	26699.5	7264.54	22313.4	3.34475	0.524364
75	tr|A0A5C2G420|A0A5C2G420_HUMAN	IGL c3869_light_IGKV2D-40_IGKJ2 (Fragment) OS=Homo sapiens OX=9606 PE=2 SV=1	2.53728	0.02064	5395.95	2809.45	5376.13	3233.06	2809.81	1580.13	2586.51	1.92065	0.283447
76	tr|A0A5C2GJM6|A0A5C2GJM6_HUMAN	IG c650_light_IGKV4-1_IGKJ1 (Fragment) OS=Homo sapiens OX=9606 PE=2 SV=1	2.52609	0.02113	11653	5734.67	10997.7	5549.82	6032.71	4300.86	5918.34	2.03203	0.30793
77	tr|A0A5C2G8F3|A0A5C2G8F3_HUMAN	IGL c86_light_IGKV1-6_IGKJ1 (Fragment) OS=Homo sapiens OX=9606 PE=2 SV=1	2.51386	0.02167	48065.7	29206.5	51088.6	27368.4	19410.2	13640.2	18859.1	1.64572	0.216355
78	tr|A0A7S5C0D5|A0A7S5C0D5_HUMAN	IGH c1572_heavy_IGHV5-51_IGHD3-22_IGHJ4 (Fragment) OS=Homo sapiens OX=9606 PE=2 SV=1	2.49012	0.02277	5434.55	1736.72	3982.2	1504.85	4475.28	1422.78	3697.83	3.12921	0.495434
79	tr|A0A5C2FUE0|A0A5C2FUE0_HUMAN	IGL c608_light_IGKV1D-39_IGKJ2 (Fragment) OS=Homo sapiens OX=9606 PE=2 SV=1	2.48956	0.0228	8182.93	3489.42	6698.16	3275.04	5324.42	2682.03	4693.51	2.34507	0.370155
80	tr|A0A5C2GVT8|A0A5C2GVT8_HUMAN	IG c1695_light_IGLV1-47_IGLJ2 (Fragment) OS=Homo sapiens OX=9606 PE=2 SV=1	2.48517	0.02301	3149.64	1679.2	3304.57	1252.35	1341.41	1304.44	1470.45	1.87568	0.273159
81	sp|P05109|S10A8_HUMAN	Protein S100-A8 OS=Homo sapiens OX=9606 GN=S100A8 PE=1 SV=1	-2.48277	0.02312	5284.27	10251.1	4823.72	9199.84	2184.28	5937.16	-4966.84	0.515483	-0.287786
82	tr|A0A4P8J548|A0A4P8J548_HUMAN	IgG4_IGHV3-7 (Fragment) OS=Homo sapiens OX=9606 PE=2 SV=1	2.48081	0.02321	16829.2	8616.3	16988.8	7311.31	9523.03	4348.54	8212.85	1.95318	0.290741
83	tr|A0A5C2GPF5|A0A5C2GPF5_HUMAN	IG c1256_heavy_IGHV3-23_IGHD3-3_IGHJ6 (Fragment) OS=Homo sapiens OX=9606 PE=2 SV=1	-2.47389	0.02355	1052.33	3195.62	879.078	2720.43	727.491	2641.33	-2143.29	0.329304	-0.482404
84	tr|V9HWA9|V9HWA9_HUMAN	C3-beta-c OS=Homo sapiens OX=9606 GN=HEL-S-62p PE=2 SV=1	2.45789	0.02434	3.90999e+06	3.06578e+06	3.9361e+06	2.82073e+06	901517	605788	844210	1.27537	0.105635
85	tr|E9KL36|E9KL36_HUMAN	Transthyretin OS=Homo sapiens OX=9606 GN=HEL111 PE=2 SV=1	-2.44387	0.02506	56555.8	80288.8	54679.7	81079.4	20123.8	23197.4	-23733	0.704405	-0.152178
86	tr|A0A7S5C286|A0A7S5C286_HUMAN	IGH c385_heavy_IGHV3-23_IGHD3-22_IGHJ4 (Fragment) OS=Homo sapiens OX=9606 PE=2 SV=1	2.44209	0.02515	17525.7	9196.33	14997.3	8687.33	9924.97	4222.36	8329.4	1.90573	0.280062
87	tr|A0A7S5C1D9|A0A7S5C1D9_HUMAN	IGH c2097_heavy_IGHV3-7_IGHD6-19_IGHJ6 (Fragment) OS=Homo sapiens OX=9606 PE=2 SV=1	2.44184	0.02516	28844.1	17087.3	25361.2	16663.5	14362.4	5053.63	11756.8	1.68804	0.227383
88	tr|A0A5C2FWZ7|A0A5C2FWZ7_HUMAN	IGL c1194_light_IGKV3-11_IGKJ4 (Fragment) OS=Homo sapiens OX=9606 PE=2 SV=1	2.44192	0.02516	8159.43	4245.87	8467.75	3233.34	3779.54	3376.42	3913.56	1.92173	0.283693
89	tr|A0A7S5C5I4|A0A7S5C5I4_HUMAN	IGH c4062_heavy_IGHV3-33_IGHD3-22_IGHJ4 (Fragment) OS=Homo sapiens OX=9606 PE=2 SV=1	2.41511	0.02659	2899.51	1364.79	2954.11	784.688	1656.13	1138.17	1534.73	2.12452	0.327261
90	tr|A0A5C2FXZ8|A0A5C2FXZ8_HUMAN	IGL c1524_light_IGKV4-1_IGKJ1 (Fragment) OS=Homo sapiens OX=9606 PE=2 SV=1	2.40359	0.02723	19986.8	4792.04	11025.7	4155.66	19864.4	2245.75	15194.7	4.17083	0.620223
91	tr|F8WF14|F8WF14_HUMAN	Carboxylic ester hydrolase OS=Homo sapiens OX=9606 GN=BCHE PE=1 SV=1	-2.38494	0.02829	17663.9	23421.2	18414.5	22760	4588.72	6100.68	-5757.28	0.754185	-0.122522
92	tr|A0A3B3IQ51|A0A3B3IQ51_HUMAN	Complement factor H-related protein 2 OS=Homo sapiens OX=9606 GN=CFHR2 PE=1 SV=1	2.38168	0.02848	17935.2	11944	18320.1	11724.9	5625.78	5623.95	5991.16	1.5016	0.176555
93	tr|A0A5C2GAW1|A0A5C2GAW1_HUMAN	IGL c562_light_IGKV1D-39_IGKJ1 (Fragment) OS=Homo sapiens OX=9606 PE=2 SV=1	2.37285	0.029	3834.83	1868.55	3081.85	1793.77	2199.92	1423.74	1966.28	2.0523	0.312241
94	tr|A0A7S5EYK2|A0A7S5EYK2_HUMAN	IGH c4019_heavy_IGHV3-23_IGHD2-21_IGHJ6 (Fragment) OS=Homo sapiens OX=9606 PE=2 SV=1	2.36341	0.02956	421547	232860	401269	263379	193924	161657	188687	1.8103	0.257752
95	tr|A0A7S5C550|A0A7S5C550_HUMAN	IGH c1981_heavy_IGHV4-59B_IGHD4-23_IGHJ4 (Fragment) OS=Homo sapiens OX=9606 PE=2 SV=1	2.36239	0.02962	3243.46	1199.37	2139.51	804.364	2526.26	1051.07	2044.08	2.70429	0.432054
96	tr|A0A7S5BYJ7|A0A7S5BYJ7_HUMAN	IGH c627_heavy_IGHV4-39_IGHD1-26_IGHJ6 (Fragment) OS=Homo sapiens OX=9606 PE=2 SV=1	2.35156	0.03028	446.061	171.16	347.605	147.854	346.451	128.959	274.9	2.6061	0.415991
97	tr|Q86U78|Q86U78_HUMAN	Angiotensin 1-10 OS=Homo sapiens OX=9606 PE=2 SV=1	2.35035	0.03036	7332.21	2849.35	6918.52	3072.36	5723.49	1902.64	4482.86	2.57329	0.410489
98	tr|A0A5C2GJL7|A0A5C2GJL7_HUMAN	IG c1174_light_IGKV6-21_IGKJ2 (Fragment) OS=Homo sapiens OX=9606 PE=2 SV=1	2.33331	0.03143	3186.59	1890.27	3206.01	1281.88	1298.83	1183.07	1296.32	1.68579	0.226803
99	tr|B7Z507|B7Z507_HUMAN	92 kDa gelatinase OS=Homo sapiens OX=9606 PE=2 SV=1	-2.3269	0.03184	1720.87	2851.83	1739.57	2679.18	839.31	1287.58	-1130.96	0.603427	-0.219375
100	tr|A0A024R930|A0A024R930_HUMAN	Proteoglycan 4, isoform CRA_a OS=Homo sapiens OX=9606 GN=PRG4 PE=4 SV=1	2.32508	0.03196	12651.4	8171.12	12576.3	8960.22	4902.49	3618.95	4480.3	1.54831	0.189858
101	tr|A0A5C2GSB1|A0A5C2GSB1_HUMAN	IG c1813_heavy_IGHV1-18_IGHD3-3_IGHJ5 (Fragment) OS=Homo sapiens OX=9606 PE=2 SV=1	2.31737	0.03246	8474.41	5571.8	8583.34	5370.17	3125.7	2432.82	2902.61	1.52095	0.182114
102	tr|A0A5C2H014|A0A5C2H014_HUMAN	IG c1278_light_IGKV1-5_IGKJ1 (Fragment) OS=Homo sapiens OX=9606 PE=2 SV=1	2.31434	0.03267	8747.5	4767.77	7931.91	4646.31	4909.88	2337.35	3979.73	1.83472	0.263569
103	tr|B7Z8Q2|B7Z8Q2_HUMAN	Alpha-2-HS-glycoprotein OS=Homo sapiens OX=9606 PE=2 SV=1	-2.31367	0.03271	1.35653e+06	1.54878e+06	1.28074e+06	1.50326e+06	171430	199135	-192248	0.875871	-0.0575597
104	tr|A0A5C2GBW7|A0A5C2GBW7_HUMAN	IGH + IGL c595_light_IGKV1-5_IGKJ4 (Fragment) OS=Homo sapiens OX=9606 PE=2 SV=1	2.30564	0.03325	15888.6	10118.1	17515	8943.91	6807.1	4037.73	5770.54	1.57032	0.195988
105	sp|P04196|HRG_HUMAN	Histidine-rich glycoprotein OS=Homo sapiens OX=9606 GN=HRG PE=1 SV=1	-2.30004	0.03363	452970	748994	371681	696562	229504	336116	-296024	0.604771	-0.218409
106	tr|A0A5C2GVE2|A0A5C2GVE2_HUMAN	IG c1534_light_IGKV3-20_IGKJ2 (Fragment) OS=Homo sapiens OX=9606 PE=2 SV=1	2.28441	0.0347	13359.3	8152.42	13616.8	7102.86	6677.07	2714.83	5206.93	1.6387	0.214499
107	tr|A0A5C2G1S6|A0A5C2G1S6_HUMAN	IGL c2864_light_IGKV3-20_IGKJ4 (Fragment) OS=Homo sapiens OX=9606 PE=2 SV=1	2.27703	0.03523	8240.07	4939.63	7416.07	4275.93	3233.97	3248.16	3300.44	1.66815	0.222236
108	tr|A0A5C2GR38|A0A5C2GR38_HUMAN	IG c1184_heavy_IGHV3-66_IGHD3-22_IGHJ3 (Fragment) OS=Homo sapiens OX=9606 PE=2 SV=1	2.26509	0.03608	1480.36	656.373	1124.68	748.845	1103.08	326.413	823.984	2.25536	0.353216
109	tr|A0A5C2GF65|A0A5C2GF65_HUMAN	IG c111_heavy_IGHV3-21_IGHD4-11_IGHJ4 (Fragment) OS=Homo sapiens OX=9606 PE=2 SV=1	2.26394	0.03617	11928.8	1433.31	5792.91	1048.06	14604	1282.45	10495.5	8.32261	0.920259
110	tr|A0A5C2G1A6|A0A5C2G1A6_HUMAN	IGL c1715_light_IGKV1-27_IGKJ1 (Fragment) OS=Homo sapiens OX=9606 PE=2 SV=1	2.24481	0.03758	3083.52	1472.03	3216.63	1396.89	2095.05	874.209	1611.5	2.09475	0.321132
111	tr|Q5EFE5|Q5EFE5_HUMAN	Anti-RhD monoclonal T125 gamma1 heavy chain OS=Homo sapiens OX=9606 PE=1 SV=1	2.24216	0.03779	18769.9	10209.8	16039.6	11498.2	11481.7	3731.89	8560.1	1.83842	0.264445
112	tr|Q6N030|Q6N030_HUMAN	Uncharacterized protein OS=Homo sapiens OX=9606 GN=DKFZp686I15212 PE=1 SV=1	2.23826	0.03808	663514	435666	714109	392784	217354	237452	227848	1.52299	0.182697
113	tr|A0A5C2GG46|A0A5C2GG46_HUMAN	IGL c389_light_IGKV1D-39_IGKJ1 (Fragment) OS=Homo sapiens OX=9606 PE=2 SV=1	2.2318	0.03858	7637.86	2932.4	5574.69	2482.72	6439.99	1726.01	4705.47	2.60465	0.415749
114	tr|A0A7S5EWB4|A0A7S5EWB4_HUMAN	IGH c288_heavy_IGHV3-48_IGHD4-17_IGHJ3 (Fragment) OS=Homo sapiens OX=9606 PE=2 SV=1	2.22989	0.03873	2985.31	1120.84	2569.28	759.586	2460.19	968.807	1864.47	2.66347	0.425447
115	tr|Q13784|Q13784_HUMAN	APOA4 protein (Fragment) OS=Homo sapiens OX=9606 GN=APOA4 PE=2 SV=1	-2.22652	0.03899	5771.52	27440.5	5358.63	19919.4	2588.05	30666.9	-21669	0.210329	-0.677102
116	tr|A0A5C2GGV5|A0A5C2GGV5_HUMAN	IG c110_light_IGKV4-1_IGKJ4 (Fragment) OS=Homo sapiens OX=9606 PE=2 SV=1	-2.22593	0.03903	1130.38	2459.1	891.216	2967.48	909.715	1653.99	-1328.72	0.459671	-0.337553
117	tr|A0A7S5BYS6|A0A7S5BYS6_HUMAN	IGH c384_heavy_IGHV1-69_IGHD4-23_IGHJ6 (Fragment) OS=Homo sapiens OX=9606 PE=2 SV=1	-2.20219	0.04093	1013.94	3674.49	739.502	1537.17	638.637	3766.71	-2660.55	0.275941	-0.559184
118	tr|B3KUT5|B3KUT5_HUMAN	HCG1645996, isoform CRA_b OS=Homo sapiens OX=9606 GN=hCG_1645996 PE=2 SV=1	2.19721	0.04134	151025	123614	144962	123129	35934.5	16281.2	27411.2	1.22175	0.0869816
119	sp|Q9UGM5|FETUB_HUMAN	Fetuin-B OS=Homo sapiens OX=9606 GN=FETUB PE=1 SV=2	2.18877	0.04204	6509.5	4209.23	6624.18	4890.72	2887	1646.21	2300.27	1.54648	0.189345
120	tr|A0A5C2GAN2|A0A5C2GAN2_HUMAN	IGH + IGL c266_light_IGKV1-27_IGKJ4 (Fragment) OS=Homo sapiens OX=9606 PE=2 SV=1	2.18849	0.04206	2140.01	1261.82	2361.34	1252.76	1015.68	760.687	878.196	1.69598	0.22942
121	tr|A0A5C2GKN5|A0A5C2GKN5_HUMAN	IG c369_heavy_IGHV3-74_IGHD1-26_IGHJ4 (Fragment) OS=Homo sapiens OX=9606 PE=2 SV=1	2.17762	0.04298	31200.8	17357	20042.2	18349.4	19123.9	6199.01	13843.8	1.79759	0.25469
122	tr|A0A5C2GDX1|A0A5C2GDX1_HUMAN	IGH + IGL c119_heavy_IGHV3-30_IGHD4-17_IGHJ4 (Fragment) OS=Homo sapiens OX=9606 PE=2 SV=1	2.17503	0.0432	2001.74	963.95	1465.49	816.462	1339.08	695.34	1037.79	2.0766	0.317354
123	tr|A0A7S5EWB3|A0A7S5EWB3_HUMAN	IGH c1922_heavy_IGHV3-23_IGHD3-9_IGHJ3 (Fragment) OS=Homo sapiens OX=9606 PE=2 SV=1	2.17017	0.04362	3433.57	1153.5	2462.45	950.725	3222.38	809.173	2280.07	2.97666	0.473729
124	tr|A0A5C2GRI5|A0A5C2GRI5_HUMAN	IG c1503_heavy_IGHV4-39_IGHD3-22_IGHJ3 (Fragment) OS=Homo sapiens OX=9606 PE=2 SV=1	2.16031	0.04448	10897	7356.36	9324.66	7230.28	4982.72	1426.18	3540.63	1.4813	0.170643
125	tr|A0A5C2GSW3|A0A5C2GSW3_HUMAN	IG c102_light_IGLV1-44_IGLJ3 (Fragment) OS=Homo sapiens OX=9606 PE=2 SV=1	2.14445	0.0459	10312.8	4236.14	7418.35	3680.61	8708.39	2111.73	6076.63	2.43447	0.386405
126	tr|A0A7S5C435|A0A7S5C435_HUMAN	IGH c3487_heavy_IGHV3-11_IGHD5-12_IGHJ6 (Fragment) OS=Homo sapiens OX=9606 PE=2 SV=1	2.13641	0.04663	4372.85	2028.95	3487.64	1957.77	3362.8	853.426	2343.9	2.15523	0.333494
127	tr|A0A5C2GJP9|A0A5C2GJP9_HUMAN	IG c1141_heavy_IGHV3-49_IGHD3-10_IGHJ6 (Fragment) OS=Homo sapiens OX=9606 PE=2 SV=1	2.13455	0.0468	1714.26	690.08	1148.49	368.515	1354.62	683.516	1024.18	2.48415	0.395177
128	tr|A0A5C2GYF7|A0A5C2GYF7_HUMAN	IG c1647_heavy_IGHV3-23_IGHD5-24_IGHJ4 (Fragment) OS=Homo sapiens OX=9606 PE=2 SV=1	2.13408	0.04685	1603.68	949.072	1590.69	914.266	870.693	427.53	654.606	1.68973	0.227818
129	tr|A0A5C2G8C0|A0A5C2G8C0_HUMAN	IGH + IGL c34_heavy_IGHV3-21_IGHD2-2_IGHJ4 (Fragment) OS=Homo sapiens OX=9606 PE=2 SV=1	2.13045	0.04718	4972.91	1848.41	3308.93	1471.41	4534.92	971.322	3124.5	2.69037	0.429812
130	tr|A0A5C2FZ22|A0A5C2FZ22_HUMAN	IGL c517_light_IGKV1-39_IGKJ2 (Fragment) OS=Homo sapiens OX=9606 PE=2 SV=1	2.12961	0.04726	8810.44	2204.87	4960.22	2331.64	9697.76	1470.84	6605.57	3.9959	0.601614
131	tr|G3XAM2|G3XAM2_HUMAN	Complement factor I OS=Homo sapiens OX=9606 GN=CFI PE=1 SV=1	2.12956	0.04727	143340	111504	136854	118270	41664.3	22339.6	31836.5	1.28552	0.109078
132	tr|A0A7S5C045|A0A7S5C045_HUMAN	IGH c1372_heavy_IGHV3-53_IGHD3-10_IGHJ3 (Fragment) OS=Homo sapiens OX=9606 PE=2 SV=1	2.11572	0.04857	2616.65	1328.87	2369.31	1491.26	1711.86	879.998	1287.79	1.96909	0.294265
133	tr|A0A5C2GDM3|A0A5C2GDM3_HUMAN	IGH + IGL c594_light_IGKV2-28_IGKJ2 (Fragment) OS=Homo sapiens OX=9606 PE=2 SV=1	2.1136	0.04877	4959.32	3040.99	5143.81	2805.58	2511.09	1389.97	1918.32	1.63082	0.212407
134	tr|A0A024R3E3|A0A024R3E3_HUMAN	Apolipoprotein A-I, isoform CRA_a OS=Homo sapiens OX=9606 GN=APOA1 PE=2 SV=1	-2.09946	0.05014	4.97452e+07	6.05269e+07	4.62314e+07	6.17898e+07	1.19109e+07	1.10391e+07	-1.07817e+07	0.821869	-0.0851975
135	tr|A0A5C2GF44|A0A5C2GF44_HUMAN	IG c1250_heavy_IGHV3-15_IGHD1-26_IGHJ2 (Fragment) OS=Homo sapiens OX=9606 PE=2 SV=1	2.09777	0.05031	12397.3	7906.45	11688.6	7131.15	3984.84	5472.73	4490.87	1.568	0.195346
136	tr|A0A7S5EWS1|A0A7S5EWS1_HUMAN	IGH c768_heavy_IGHV3-48_IGHD4-17_IGHJ3 (Fragment) OS=Homo sapiens OX=9606 PE=2 SV=1	-2.09607	0.05048	3850.02	9016.62	1426.77	9418.97	4577.01	6309.38	-5166.6	0.426991	-0.369581
137	tr|A0A140VK24|A0A140VK24_HUMAN	Testicular secretory protein Li 24 OS=Homo sapiens OX=9606 PE=2 SV=1	2.09439	0.05064	13139	10577.9	13324.4	10583.2	3328.12	1968.96	2561.09	1.24212	0.0941624
138	tr|B7Z8A2|B7Z8A2_HUMAN	cDNA FLJ51671, highly similar to Prenylcysteine oxidase OS=Homo sapiens OX=9606 PE=2 SV=1	2.08917	0.05116	5020.64	3454.55	5142.63	3289.11	1838.75	1496.1	1566.09	1.45334	0.162367
139	tr|A0A125QYY4|A0A125QYY4_HUMAN	GCT-A7 heavy chain variable region (Fragment) OS=Homo sapiens OX=9606 PE=2 SV=1	2.08843	0.05124	18245.8	10412.5	20551.8	8928.22	8388.8	8385.31	7833.31	1.7523	0.243608
140	tr|A0A5C2G9L0|A0A5C2G9L0_HUMAN	IGH + IGL c484_heavy_IGHV1-2_IGHD4-17_IGHJ6 (Fragment) OS=Homo sapiens OX=9606 PE=2 SV=1	2.07788	0.0523	4841.98	2446.31	4994.48	2564.35	3297.2	1555.98	2395.67	1.9793	0.296511
141	tr|A0A1U9X7H7|A0A1U9X7H7_HUMAN	C3/C5 convertase OS=Homo sapiens OX=9606 PE=4 SV=1	-2.07285	0.05282	824.477	6472.01	659.166	901.586	456.38	8603.62	-5647.54	0.127391	-0.894861
142	tr|A0A384NKS6|A0A384NKS6_HUMAN	Clusterin OS=Homo sapiens OX=9606 PE=2 SV=1	2.07052	0.05306	582180	513809	588043	509382	92807.8	47858.6	68370.4	1.13307	0.0542551
143	tr|A0A5C2G2X8|A0A5C2G2X8_HUMAN	IGL c3628_light_IGLV1-47_IGLJ3 (Fragment) OS=Homo sapiens OX=9606 PE=2 SV=1	-2.06615	0.05351	457.016	985.456	396.495	715.893	191.172	785.87	-528.44	0.463761	-0.333706
144	tr|A0A5C2GNZ0|A0A5C2GNZ0_HUMAN	IG c878_light_IGKV1-5_IGKJ2 (Fragment) OS=Homo sapiens OX=9606 PE=2 SV=1	2.06091	0.05406	241864	156211	191629	144444	119385	54956.5	85653.5	1.54832	0.189861
145	tr|A0A7S5C115|A0A7S5C115_HUMAN	IGH c1867_heavy_IGHV3-49_IGHD2-2_IGHJ6 (Fragment) OS=Homo sapiens OX=9606 PE=2 SV=1	2.05943	0.05422	2967.41	1478.27	3235.03	983.435	1511.53	1715.74	1489.13	2.00735	0.302622
146	tr|Q53GN8|Q53GN8_HUMAN	Macrophage stimulating 1 (Hepatocyte growth factor-like) variant (Fragment) OS=Homo sapiens OX=9606 PE=2 SV=1	-2.05879	0.05429	11115.4	15149.2	12703.9	15787.3	4469.38	4291.07	-4033.8	0.733729	-0.134464
147	tr|A0A5C2G7I4|A0A5C2G7I4_HUMAN	IGH c572_heavy__IGHV3-21_IGHD5-18_IGHJ5 (Fragment) OS=Homo sapiens OX=9606 PE=2 SV=1	2.05768	0.0544	2984.15	1104.36	2444.61	844.709	2727.56	951.891	1879.78	2.70214	0.431708
148	tr|A0A5C2G118|A0A5C2G118_HUMAN	IGL c2822_light_IGLV3-21_IGLJ2 (Fragment) OS=Homo sapiens OX=9606 PE=2 SV=1	2.0574	0.05443	11012.2	1361.2	2913	988.93	14802	970.427	9651	8.09009	0.907953
149	tr|Q9NSD0|Q9NSD0_HUMAN	Vitamin K-dependent protein S OS=Homo sapiens OX=9606 PE=2 SV=1	2.05517	0.05467	165725	138603	175863	140721	37526.5	18258.1	27122	1.19568	0.0776157
150	tr|A0A5C2G325|A0A5C2G325_HUMAN	IGL c2355_light_IGLV3-21_IGLJ2 (Fragment) OS=Homo sapiens OX=9606 PE=2 SV=1	2.05298	0.0549	15798.5	12319.2	14969.4	12040.7	5012.89	1895.46	3479.3	1.28243	0.108034
151	tr|A0A5C2G011|A0A5C2G011_HUMAN	IGL c1726_light_IGKV2D-29_IGKJ4 (Fragment) OS=Homo sapiens OX=9606 PE=2 SV=1	2.0514	0.05507	622.912	262.929	393.656	228.206	530.086	164.151	359.983	2.36912	0.374588
152	tr|A0A5C2G4A9|A0A5C2G4A9_HUMAN	IGL c1133_light_IGKV3-20_IGKJ1 (Fragment) OS=Homo sapiens OX=9606 PE=2 SV=1	2.04186	0.0561	2656.15	1141.1	1583.32	840.3	2150.08	939.521	1515.05	2.32771	0.366928
153	tr|A0A5C2G8T7|A0A5C2G8T7_HUMAN	IGH + IGL c240_heavy_IGHV3-64_IGHD4-4_IGHJ6 (Fragment) OS=Homo sapiens OX=9606 PE=2 SV=1	2.00614	0.06011	8629.51	3694.43	7537.96	2420.11	7263.67	2784.66	4935.08	2.33581	0.368438
154	tr|A8K335|A8K335_HUMAN	Folate gamma-glutamyl hydrolase OS=Homo sapiens OX=9606 PE=2 SV=1	2.00493	0.06025	784.95	410.95	711.358	405.23	473.817	351.381	374	1.91009	0.281053
155	tr|A0A5C2G4Z5|A0A5C2G4Z5_HUMAN	IGL c4209_light_IGKV3-11_IGKJ3 (Fragment) OS=Homo sapiens OX=9606 PE=2 SV=1	1.99478	0.06144	8224.12	4761.45	6389.96	4037.56	4923.73	2426.8	3462.67	1.72723	0.23735
156	tr|I3L145|I3L145_HUMAN	Sex hormone-binding globulin OS=Homo sapiens OX=9606 GN=SHBG PE=1 SV=1	1.9936	0.06157	47750.5	28902.9	46909.3	16794.8	18648.6	23367	18847.6	1.6521	0.218036
157	tr|A0A7S5C1K5|A0A7S5C1K5_HUMAN	IGH c2513_heavy_IGHV1-69_IGHD5-12_IGHJ2 (Fragment) OS=Homo sapiens OX=9606 PE=2 SV=1	1.99252	0.0617	2855.02	977.755	1831.11	958.521	2940.98	476.641	1877.26	2.91997	0.465379
158	sp|Q86UD1|OAF_HUMAN	Out at first protein homolog OS=Homo sapiens OX=9606 GN=OAF PE=2 SV=1	-1.97982	0.06322	2365.57	3715.56	2628.99	3426	1329.23	1697.85	-1349.99	0.636667	-0.196088
159	sp|Q14520|HABP2_HUMAN	Hyaluronan-binding protein 2 OS=Homo sapiens OX=9606 GN=HABP2 PE=1 SV=1	1.97926	0.06329	41473.9	33857.5	41927.5	32193.3	8877.95	8322.33	7616.39	1.22495	0.0881199
160	tr|A0A7S5C098|A0A7S5C098_HUMAN	IGH c1626_heavy_IGHV3-33_IGHD3-16_IGHJ2 (Fragment) OS=Homo sapiens OX=9606 PE=2 SV=1	1.96803	0.06466	12188.4	7403.43	9531.04	6409.51	7031.87	3109.1	4784.94	1.64631	0.216512
161	tr|A0A5C2FWE4|A0A5C2FWE4_HUMAN	IGL c148_light_IGKV3-15_IGKJ2 (Fragment) OS=Homo sapiens OX=9606 PE=2 SV=1	1.95981	0.06569	1826.9	927.271	1843.65	830.455	1336.14	567.382	899.63	1.97019	0.294509
162	tr|A0A5C2FZE3|A0A5C2FZE3_HUMAN	IGL c617_light_IGKV3-11_IGKJ4 (Fragment) OS=Homo sapiens OX=9606 PE=2 SV=1	1.94352	0.06776	63429.7	22216.8	39578.8	19814.5	66813.4	5712.51	41213	2.85504	0.455612
163	sp|P02760|AMBP_HUMAN	Protein AMBP OS=Homo sapiens OX=9606 GN=AMBP PE=1 SV=1	1.9378	0.0685	379295	294331	335982	297370	128965	50914	84963.7	1.28867	0.110141
164	tr|A0A7S5C3B1|A0A7S5C3B1_HUMAN	IGH c3428_heavy_IGHV3-48_IGHD6-13_IGHJ4 (Fragment) OS=Homo sapiens OX=9606 PE=2 SV=1	1.93682	0.06863	5596.64	2605.6	4465.49	2149.5	4688.83	1365.14	2991.03	2.14792	0.332019
165	tr|A0A5C2GI95|A0A5C2GI95_HUMAN	IG c494_light_IGKV1-5_IGKJ2 (Fragment) OS=Homo sapiens OX=9606 PE=2 SV=1	1.92702	0.06991	209204	134002	167267	129652	114889	45050.9	75201.2	1.56119	0.193456
166	tr|A0A5C2G8Z1|A0A5C2G8Z1_HUMAN	IGH + IGL c153_heavy_IGHV1-69_IGHD6-13_IGHJ6 (Fragment) OS=Homo sapiens OX=9606 PE=2 SV=1	1.92678	0.06994	4884.77	3156.59	4745.3	2897.8	2318.38	1633.97	1728.18	1.54748	0.189626
167	tr|A0A7S5EU24|A0A7S5EU24_HUMAN	IGH c1471_heavy_IGHV1-69_IGHD3-10_IGHJ5 (Fragment) OS=Homo sapiens OX=9606 PE=2 SV=1	1.92399	0.07032	2669.5	1208.39	1979.68	1258.98	2337.89	549	1461.11	2.20913	0.344222
168	tr|A0A5C2G9J5|A0A5C2G9J5_HUMAN	IGL c495_light_IGKV3-20_IGKJ1 (Fragment) OS=Homo sapiens OX=9606 PE=2 SV=1	1.92342	0.07039	4864.86	2068.02	3319.43	1718.79	4172.7	1932.02	2796.84	2.35243	0.371516
169	tr|A0A125U0U6|A0A125U0U6_HUMAN	MS-A4 light chain variable region (Fragment) OS=Homo sapiens OX=9606 PE=2 SV=1	1.90737	0.07256	4160.77	2076.33	2779.4	2062.23	3265.61	1130.76	2084.43	2.0039	0.301876
170	tr|A0A5C2GK46|A0A5C2GK46_HUMAN	IG c1088_light_IGLV3-21_IGLJ2 (Fragment) OS=Homo sapiens OX=9606 PE=2 SV=1	1.90254	0.07322	537.357	308.911	535.862	271.028	287.018	248.595	228.446	1.73952	0.24043
171	tr|A0A7S5C3S7|A0A7S5C3S7_HUMAN	IGH c3611_heavy_IGHV3-43_IGHD3-16_IGHJ4 (Fragment) OS=Homo sapiens OX=9606 PE=2 SV=1	1.9016	0.07335	6168.26	2677.12	3694.79	2022.42	5364.02	2220.88	3491.13	2.30406	0.362494
172	tr|Q9NPP6|Q9NPP6_HUMAN	Immunoglobulin heavy chain variant (Fragment) OS=Homo sapiens OX=9606 PE=2 SV=1	1.89754	0.07392	127538	77266.6	113236	72565.5	77475.6	31879.1	50271.3	1.65062	0.217648
173	tr|A0A5C2FTG3|A0A5C2FTG3_HUMAN	IGL c248_light_IGKV1D-33_IGKJ3 (Fragment) OS=Homo sapiens OX=9606 PE=2 SV=1	1.89473	0.07431	2149.35	1273.88	2129.75	1219.52	1180.77	860.65	875.468	1.68725	0.227178
174	tr|A0A7S5EUH6|A0A7S5EUH6_HUMAN	IGH c2176_heavy_IGHV4-4_IGHD3-10_IGHJ4 (Fragment) OS=Homo sapiens OX=9606 PE=2 SV=1	1.86115	0.07914	11388.5	7612.25	8161.49	7118.54	5855.3	2623.61	3776.25	1.49608	0.174953
175	sp|P22792|CPN2_HUMAN	Carboxypeptidase N subunit 2 OS=Homo sapiens OX=9606 GN=CPN2 PE=1 SV=3	1.82773	0.08421	149169	120569	148798	127029	40641.5	28227.3	28599.9	1.23721	0.0924425
176	tr|A0N071|A0N071_HUMAN	Delta globin OS=Homo sapiens OX=9606 GN=HBD PE=3 SV=1	1.8194	0.08553	31099.8	6689.5	11223.9	5721.71	42266	3697.73	24410.3	4.64905	0.667364
177	tr|A0A5C2GDG0|A0A5C2GDG0_HUMAN	IG c1087_heavy_IGHV1-69_IGHD4-23_IGHJ6 (Fragment) OS=Homo sapiens OX=9606 PE=2 SV=1	-1.81344	0.08647	1693.76	7044.64	1032.31	3630.93	1909.25	9133.44	-5350.87	0.240433	-0.619006
178	tr|A0A5C2GN95|A0A5C2GN95_HUMAN	IG c336_light_IGKV1D-39_IGKJ2 (Fragment) OS=Homo sapiens OX=9606 PE=2 SV=1	1.79848	0.08889	5322.96	2357.85	3676.07	1808.88	4758.21	2130.9	2965.11	2.25755	0.353637
179	tr|A0A5C2GFF7|A0A5C2GFF7_HUMAN	IG c500_heavy_IGHV3-23_IGHD6-19_IGHJ4 (Fragment) OS=Homo sapiens OX=9606 PE=2 SV=1	1.79659	0.0892	7174.75	4001.81	5092.01	3387.11	4921.65	2639.73	3172.95	1.79288	0.253551
180	tr|A0A5C2G2V5|A0A5C2G2V5_HUMAN	IGL c3244_light_IGKV2D-40_IGKJ2 (Fragment) OS=Homo sapiens OX=9606 PE=2 SV=1	1.79243	0.08989	5656.99	3472.97	5181.35	2503.91	3129.29	2248.14	2184.02	1.62886	0.211884
181	tr|B3KS79|B3KS79_HUMAN	cDNA FLJ35730 fis, clone TESTI2003131, highly similar to ALPHA-1-ANTICHYMOTRYPSIN OS=Homo sapiens OX=9606 PE=2 SV=1	1.78531	0.09107	2.15088e+06	1.56369e+06	2.45055e+06	1.34993e+06	755251	715082	587188	1.37551	0.138465
182	tr|D3JV41|D3JV41_HUMAN	C-X-C motif chemokine (Fragment) OS=Homo sapiens OX=9606 PE=3 SV=1	1.78233	0.09157	132296	105637	139594	119923	32971	33913.8	26659.1	1.25237	0.0977312
183	tr|A0A5C2G5Z9|A0A5C2G5Z9_HUMAN	IGL c4040_light_IGKV3-20_IGKJ2 (Fragment) OS=Homo sapiens OX=9606 PE=2 SV=1	1.77926	0.09209	3980.31	776.962	1427.17	589.034	5662.22	594.101	3203.35	5.12292	0.709517
184	tr|A0A024R035|A0A024R035_HUMAN	Complement component C9 OS=Homo sapiens OX=9606 GN=C9 PE=3 SV=1	1.77681	0.0925	273894	181693	255116	190131	152955	59427.3	92200.8	1.50745	0.178244
185	tr|A0A5C2GHB7|A0A5C2GHB7_HUMAN	IG c677_heavy_IGHV3-9_IGHD6-13_IGHJ4 (Fragment) OS=Homo sapiens OX=9606 PE=2 SV=1	-1.75984	0.09542	2612.96	5860.77	2299.81	3788.94	1859.39	5531.89	-3247.81	0.445839	-0.350822
186	tr|A0A5C2GHY7|A0A5C2GHY7_HUMAN	IG c1258_heavy_IGHV1-18_IGHD3-16_IGHJ5 (Fragment) OS=Homo sapiens OX=9606 PE=2 SV=1	1.73562	0.09972	5729.66	2427.14	3247.77	1694.25	5610.43	2174.66	3302.52	2.36066	0.373033
187	tr|A0A5C2GPZ0|A0A5C2GPZ0_HUMAN	IG c650_heavy_IGHV3-23_IGHD4-11_IGHJ4 (Fragment) OS=Homo sapiens OX=9606 PE=2 SV=1	1.73098	0.10056	11096.3	7220.71	9396.82	7253.36	6691.58	2313.68	3875.62	1.53674	0.1866
188	tr|A0A5C2GR69|A0A5C2GR69_HUMAN	IG c1214_heavy_IGHV3-33_IGHD6-13_IGHJ5 (Fragment) OS=Homo sapiens OX=9606 PE=2 SV=1	1.72993	0.10075	8293.51	1236.31	2918.71	1207.56	12879.5	733.969	7057.2	6.70827	0.826611
189	sp|P08697|A2AP_HUMAN	Alpha-2-antiplasmin OS=Homo sapiens OX=9606 GN=SERPINF2 PE=1 SV=3	1.72362	0.10191	147957	124147	158066	124413	34827.4	26370.1	23810.5	1.19179	0.0762007
190	tr|A0A5C2GT30|A0A5C2GT30_HUMAN	IG c701_heavy_IGHV3-33_IGHD5-24_IGHJ2 (Fragment) OS=Homo sapiens OX=9606 PE=2 SV=1	1.71587	0.10335	7595.11	3069.13	5304.77	2582.44	8074.44	2092.66	4525.98	2.47468	0.393519
191	tr|F6KPG5|F6KPG5_HUMAN	Albumin (Fragment) OS=Homo sapiens OX=9606 PE=2 SV=1	-1.71343	0.1038	596099	910884	642513	990151	212159	540840	-314785	0.654418	-0.184145
192	tr|A0A5C2GS46|A0A5C2GS46_HUMAN	IG c1300_heavy_IGHV3-15_IGHD3-3_IGHJ6 (Fragment) OS=Homo sapiens OX=9606 PE=2 SV=1	-1.7083	0.10477	1209.02	2626.32	635.394	1800.48	1050.18	2404.23	-1417.3	0.460348	-0.336914
193	tr|A0A5C2GNV9|A0A5C2GNV9_HUMAN	IG c354_heavy_IGHV5-51_IGHD6-19_IGHJ5 (Fragment) OS=Homo sapiens OX=9606 PE=2 SV=1	1.70816	0.10479	2090.97	844.018	1135.72	734.13	2255.98	489.402	1246.95	2.4774	0.393997
194	tr|A0A096LPE2|A0A096LPE2_HUMAN	SAA2-SAA4 readthrough OS=Homo sapiens OX=9606 GN=SAA2-SAA4 PE=3 SV=1	1.70801	0.10482	34368.1	28184.5	33222.9	27178.6	10883.3	3552.9	6183.59	1.2194	0.0861451
195	sp|P00739|HPTR_HUMAN	Haptoglobin-related protein OS=Homo sapiens OX=9606 GN=HPR PE=2 SV=2	1.70491	0.10541	315004	176559	331357	129991	210247	147433	138444	1.78412	0.251425
196	tr|A0A7S5C294|A0A7S5C294_HUMAN	IGH c400_heavy_IGHV5-51_IGHD6-25_IGHJ6 (Fragment) OS=Homo sapiens OX=9606 PE=2 SV=1	1.69279	0.10773	1799.27	772.977	1121.98	826.612	1885.48	347.291	1026.29	2.32771	0.366929
197	tr|A0A7S5C577|A0A7S5C577_HUMAN	IGH c3575_heavy_IGHV4-59B_IGHD2-21_IGHJ4 (Fragment) OS=Homo sapiens OX=9606 PE=2 SV=1	-1.68461	0.10932	904.324	3093.09	921.629	730.197	434.094	4085.67	-2188.77	0.292369	-0.534069
198	tr|A0A5C2GHW5|A0A5C2GHW5_HUMAN	IG c466_light_IGKV2-30_IGKJ2 (Fragment) OS=Homo sapiens OX=9606 PE=2 SV=1	1.67154	0.11191	8088.58	4671.7	7092.13	3871.89	4822.29	4304.76	3416.88	1.7314	0.238397
199	tr|A0A7S5BY15|A0A7S5BY15_HUMAN	IGH c252_heavy_IGHV4-39_IGHD3-10_IGHJ4 (Fragment) OS=Homo sapiens OX=9606 PE=2 SV=1	1.65578	0.11509	938.363	615.275	919.797	603.163	501.677	359.255	323.088	1.52511	0.183301
200	tr|A0A5C2GXA0|A0A5C2GXA0_HUMAN	IG c1059_light_IGLV2-23_IGLJ3 (Fragment) OS=Homo sapiens OX=9606 PE=2 SV=1	-1.6375	0.11889	19211.3	26319.4	18263.8	23373.8	5433.21	12605.9	-7108.11	0.729929	-0.13672
201	tr|A0A5C2GDM9|A0A5C2GDM9_HUMAN	IGH c71_heavy__IGHV3-7_IGHD4-23_IGHJ3 (Fragment) OS=Homo sapiens OX=9606 PE=2 SV=1	1.63548	0.11931	14784.6	10696.4	16411.7	9146.53	5909.88	5249.6	4088.2	1.3822	0.140572
202	tr|A0A7S5BYM1|A0A7S5BYM1_HUMAN	IGH c731_heavy_IGHV1-69_IGHD1-26_IGHJ4 (Fragment) OS=Homo sapiens OX=9606 PE=2 SV=1	1.62334	0.1219	18910	11570.3	16341.5	8188.06	10191.8	10027.8	7339.73	1.63436	0.213348
203	tr|A0A5C2G5C2|A0A5C2G5C2_HUMAN	IGH c189_heavy__IGHV3-33_IGHD6-19_IGHJ5 (Fragment) OS=Homo sapiens OX=9606 PE=2 SV=1	1.61449	0.12381	13599.9	3000.99	4013.04	2625.7	20685.6	1754.69	10598.9	4.53181	0.656271
204	tr|A0A7S5BXJ3|A0A7S5BXJ3_HUMAN	IGH c278_heavy_IGHV3-33_IGHD3-3_IGHJ5 (Fragment) OS=Homo sapiens OX=9606 PE=2 SV=1	1.61147	0.12447	3675.08	1912.3	4708.07	1088.44	2822.15	2000.42	1762.78	1.92182	0.283712
205	tr|A0A5C2GY75|A0A5C2GY75_HUMAN	IG c670_light_IGKV2-24_IGKJ2 (Fragment) OS=Homo sapiens OX=9606 PE=2 SV=1	1.59982	0.12704	42305.6	11630	11750.9	13155.2	60307.7	6291.16	30675.7	3.63764	0.56082
206	tr|A0A5C2FV72|A0A5C2FV72_HUMAN	IGL c672_light_IGKV3-20_IGKJ3 (Fragment) OS=Homo sapiens OX=9606 PE=2 SV=1	1.59823	0.1274	12006.6	4478.94	3685.61	2845.43	14596.1	2965.67	7527.66	2.68068	0.428245
207	tr|A0A5C2FT87|A0A5C2FT87_HUMAN	IGL c191_light_IGKV2-30_IGKJ2 (Fragment) OS=Homo sapiens OX=9606 PE=2 SV=1	1.59204	0.12878	5651.24	514.658	1108.06	426.291	10196.7	352.197	5136.59	10.9806	1.04063
208	tr|V9HWE3|V9HWE3_HUMAN	Carbonic anhydrase OS=Homo sapiens OX=9606 GN=HEL-S-11 PE=2 SV=1	1.58424	0.13055	15415	5496.58	5137.62	5357.72	19688.5	2079.71	9918.41	2.80447	0.447851
209	tr|A0A5C2GH70|A0A5C2GH70_HUMAN	IG c941_heavy_IGHV3-7_IGHD3-3_IGHJ6 (Fragment) OS=Homo sapiens OX=9606 PE=2 SV=1	1.58402	0.1306	9417.91	3554.37	5558.96	3171.41	11544.1	1938.53	5863.54	2.64967	0.423192
210	tr|A0A650F0N3|A0A650F0N3_HUMAN	Beta-globin (Fragment) OS=Homo sapiens OX=9606 PE=3 SV=1	1.58093	0.13131	295422	45029.1	57455.8	45251.3	499967	29774.4	250392	6.56068	0.816949
211	tr|D9YZU5|D9YZU5_HUMAN	Beta-globin OS=Homo sapiens OX=9606 GN=HBB PE=3 SV=1	1.58077	0.13134	312607	71885.9	80796.6	79493.6	479771	41404.4	240722	4.34866	0.638356
212	tr|A0A140KFU0|A0A140KFU0_HUMAN	Beta globin (Fragment) OS=Homo sapiens OX=9606 GN=hbb PE=3 SV=1	1.57931	0.13168	325297	44683.5	59129	36284.9	560850	33961.8	280613	7.28001	0.862132
213	tr|A0A5C2G235|A0A5C2G235_HUMAN	IGL c2610_light_IGKV1D-39_IGKJ1 (Fragment) OS=Homo sapiens OX=9606 PE=2 SV=1	1.57343	0.13303	2323.27	1412.71	2322.53	997.81	1357.51	1227.31	910.568	1.64456	0.216049
214	tr|D1MGQ2|D1MGQ2_HUMAN	Alpha-1-globin OS=Homo sapiens OX=9606 GN=HBA2 PE=3 SV=1	1.57336	0.13305	2.41613e+06	340837	396978	338985	4.16455e+06	233756	2.0753e+06	7.08882	0.850574
215	tr|A0A5C2H2C4|A0A5C2H2C4_HUMAN	IG c1116_light_IGKV3-20_IGKJ2 (Fragment) OS=Homo sapiens OX=9606 PE=2 SV=1	-1.57237	0.13328	12944.2	25455.3	10242.1	14380.3	8999.51	23497.3	-12511.1	0.508507	-0.293703
216	tr|A0A7S5EVG5|A0A7S5EVG5_HUMAN	IGH c3526_heavy_IGHV3-74_IGHD2-21_IGHJ4 (Fragment) OS=Homo sapiens OX=9606 PE=2 SV=1	1.5622	0.13565	14502.8	8722.88	11767.3	8084.8	10222.5	5691.29	5779.9	1.66261	0.220791
217	tr|A0A5C2GI16|A0A5C2GI16_HUMAN	IGH + IGL c395_heavy_IGHV3-15_IGHD4-17_IGHJ4 (Fragment) OS=Homo sapiens OX=9606 PE=2 SV=1	1.55245	0.13796	5269.61	1190.42	1625.1	1086.4	8280.81	685.269	4079.18	4.42666	0.646076
218	tr|A0A5C2GK52|A0A5C2GK52_HUMAN	IG c101_heavy_IGHV4-34_IGHD3-3_IGHJ6 (Fragment) OS=Homo sapiens OX=9606 PE=2 SV=1	1.54058	0.14081	4839.19	3010.61	4750.04	3145.75	3587.51	1103.63	1828.58	1.60738	0.206118
219	tr|A0A5C2G6F4|A0A5C2G6F4_HUMAN	IGH c590_heavy__IGHV1-2_IGHD1-26_IGHJ4 (Fragment) OS=Homo sapiens OX=9606 PE=2 SV=1	1.53477	0.14223	6009.73	3386.67	4283.54	3440.46	5169.55	1576.57	2623.06	1.77452	0.249082
220	tr|B2RMS9|B2RMS9_HUMAN	Inter-alpha (Globulin) inhibitor H4 (Plasma Kallikrein-sensitive glycoprotein) OS=Homo sapiens OX=9606 GN=ITIH4 PE=2 SV=1	-1.53323	0.14261	14731.1	19513.2	13402.3	16525.6	6991.32	6957	-4782.07	0.754931	-0.122093
221	tr|A0A5C2GF83|A0A5C2GF83_HUMAN	IG c622_heavy_IGHV3-21_IGHD2-21_IGHJ4 (Fragment) OS=Homo sapiens OX=9606 PE=2 SV=1	1.53179	0.14296	15170.1	7906.89	9297.96	7214.36	14600.7	3413.14	7263.2	1.91859	0.282982
222	tr|Q6N094|Q6N094_HUMAN	Uncharacterized protein DKFZp686O01196 OS=Homo sapiens OX=9606 GN=DKFZp686O01196 PE=2 SV=1	1.52227	0.14532	88033.1	610.353	1644.48	526.899	181606	309.064	87422.7	144.233	2.15906
223	tr|A0A7S5BYN9|A0A7S5BYN9_HUMAN	IGH c696_heavy_IGHV3-33_IGHD6-19_IGHJ4 (Fragment) OS=Homo sapiens OX=9606 PE=2 SV=1	1.51924	0.14607	4518.5	268.618	420.07	276.883	8842.55	249.324	4249.88	16.8213	1.22586
224	tr|A0A5C2GE06|A0A5C2GE06_HUMAN	IGH c231_heavy__IGHV3-11_IGHD3-10_IGHJ4 (Fragment) OS=Homo sapiens OX=9606 PE=2 SV=1	1.50921	0.1486	14287.8	9897.53	12716.1	11804.4	7089.37	5861.82	4390.23	1.44357	0.159437
225	tr|S6C4R7|S6C4R7_HUMAN	IgG L chain OS=Homo sapiens OX=9606 PE=2 SV=1	-1.49217	0.15297	1938.56	3689.03	1481.25	2272.34	1722.02	3285.78	-1750.47	0.525494	-0.279433
226	tr|A0A7S5EUY1|A0A7S5EUY1_HUMAN	IGH c1530_heavy_IGHV3-11_IGHD6-13_IGHJ5 (Fragment) OS=Homo sapiens OX=9606 PE=2 SV=1	-1.48918	0.15375	745.497	1326.12	793.695	977.152	224.196	1212.41	-580.627	0.562162	-0.250138
227	tr|A0A5C2GMP2|A0A5C2GMP2_HUMAN	IG c123_heavy_IGHV3-30_IGHD3-3_IGHJ3 (Fragment) OS=Homo sapiens OX=9606 PE=2 SV=1	1.48795	0.15407	2161.9	1293.2	1637.42	1105.83	1612.44	899.208	868.705	1.67175	0.223171
228	tr|A0A2U8J8I9|A0A2U8J8I9_HUMAN	Ig heavy chain variable region (Fragment) OS=Homo sapiens OX=9606 GN=IgH PE=2 SV=1	-1.48693	0.15434	3379.27	5081.33	3975.85	6083.54	1596.26	3248.85	-1702.07	0.665035	-0.177155
229	sp|Q13790|APOF_HUMAN	Apolipoprotein F OS=Homo sapiens OX=9606 GN=APOF PE=1 SV=2	1.48507	0.15483	4947.24	3657.86	5448.29	3393.08	2514.19	1103.2	1289.38	1.3525	0.131136
230	sp|P00736|C1R_HUMAN	Complement C1r subcomponent OS=Homo sapiens OX=9606 GN=C1R PE=1 SV=2	-1.48498	0.15485	86102.3	109086	70821.8	116884	35918.4	33246.1	-22983.3	0.78931	-0.102753
231	tr|B3KUE5|B3KUE5_HUMAN	Phospholipid transfer protein, isoform CRA_c OS=Homo sapiens OX=9606 GN=PLTP PE=2 SV=1	1.48386	0.15515	946.964	667.564	1212.47	684.352	530.873	269.659	279.4	1.41854	0.151841
232	tr|A8K430|A8K430_HUMAN	Fructose-bisphosphate aldolase OS=Homo sapiens OX=9606 PE=2 SV=1	-1.48068	0.15598	2671.35	14595	2411.95	2823.89	1604.17	25414.6	-11923.6	0.183032	-0.737473
233	tr|K7ER74|K7ER74_HUMAN	Apolipoprotein C-II OS=Homo sapiens OX=9606 GN=APOC4-APOC2 PE=1 SV=1	-1.47532	0.1574	209248	285871	179111	264632	113869	118355	-76623.1	0.731966	-0.135509
234	tr|A0A4P8J6J1|A0A4P8J6J1_HUMAN	IgG4_IGHV5-51 (Fragment) OS=Homo sapiens OX=9606 PE=2 SV=1	1.47408	0.15774	2904.99	1477.84	2009.44	1183.67	2838.79	1146.62	1427.15	1.9657	0.293518
235	tr|B3KU41|B3KU41_HUMAN	cDNA FLJ39170 fis, clone OCBBF2003028, highly similar to Rattus norvegicus basic leucine zipper and W2 domains 1 (Bzw1), mRNA OS=Homo sapiens OX=9606 PE=2 SV=1	-1.46567	0.15999	1320.24	2049.84	1294.62	1748.45	786.487	1363.61	-729.602	0.644069	-0.191068
236	tr|A0A5C2G6E4|A0A5C2G6E4_HUMAN	IGL c1983_light_IGLV2-11_IGLJ1 (Fragment) OS=Homo sapiens OX=9606 PE=2 SV=1	-1.46515	0.16013	2472.37	4972.86	2647.68	2503.34	1092.89	5285.06	-2500.48	0.497174	-0.303492
237	tr|A0A7S5BYZ6|A0A7S5BYZ6_HUMAN	IGH c49_heavy_IGHV1-46_IGHD3-10_IGHJ4 (Fragment) OS=Homo sapiens OX=9606 PE=2 SV=1	1.46294	0.16073	6740.72	4290.12	6340.01	4100.69	4900.13	2012.27	2450.6	1.57122	0.196237
238	tr|A0A7S5BZ90|A0A7S5BZ90_HUMAN	IGH c922_heavy_IGHV4-59_IGHD3-22_IGHJ4 (Fragment) OS=Homo sapiens OX=9606 PE=2 SV=1	1.46026	0.16145	1146.07	761.876	1104.15	862.413	735.132	389.596	384.192	1.50427	0.177326
239	tr|Q2KHQ6|Q2KHQ6_HUMAN	APOL1 protein OS=Homo sapiens OX=9606 GN=APOL1 PE=2 SV=2	1.45394	0.16318	77094.7	58176.8	82932.8	52516	35089.7	21487.1	18917.9	1.32518	0.122275
240	tr|A0A7S5C4Q9|A0A7S5C4Q9_HUMAN	IGH c3832_heavy_IGHV4-59B_IGHD3-22_IGHJ4 (Fragment) OS=Homo sapiens OX=9606 PE=2 SV=1	1.44406	0.1659	1603.63	892.089	1585.58	840.32	1437.67	600.802	711.536	1.79761	0.254695
241	tr|E9PFZ2|E9PFZ2_HUMAN	Ceruloplasmin OS=Homo sapiens OX=9606 GN=CP PE=1 SV=1	1.44233	0.16639	20722.3	1636.41	1012.12	1829.43	41838.5	766.971	19085.9	12.6632	1.10255
242	tr|B7ZKJ8|B7ZKJ8_HUMAN	ITIH4 protein OS=Homo sapiens OX=9606 GN=ITIH4 PE=1 SV=1	1.44213	0.16644	2651.29	1563.97	2052.72	835.966	1664.94	1706.65	1087.32	1.69523	0.229229
243	tr|A0A5C2GIG8|A0A5C2GIG8_HUMAN	IG c833_heavy_IGHV1-18_IGHD3-16_IGHJ4 (Fragment) OS=Homo sapiens OX=9606 PE=2 SV=1	1.43713	0.16784	716.726	459.292	531.143	386.644	485.235	292.274	257.434	1.5605	0.193265
244	tr|A0A5C2GI81|A0A5C2GI81_HUMAN	IG c346_heavy_IGHV4-34_IGHD3-22_IGHJ4 (Fragment) OS=Homo sapiens OX=9606 PE=2 SV=1	-1.4317	0.16936	4426.91	20635.8	3197.41	4491.84	3258.03	35652.8	-16208.9	0.214526	-0.66852
245	tr|A0A5C2GVM3|A0A5C2GVM3_HUMAN	IG c846_light_IGKV3-20_IGKJ4 (Fragment) OS=Homo sapiens OX=9606 PE=2 SV=1	1.43122	0.1695	3598.81	2315.8	3289.57	1463.4	1701.96	2267.04	1283.01	1.55402	0.191457
246	tr|A0A5C2GGH7|A0A5C2GGH7_HUMAN	IG c408_heavy_IGHV3-33_IGHD3-22_IGHJ6 (Fragment) OS=Homo sapiens OX=9606 PE=2 SV=1	1.42989	0.16988	2007.47	1091.84	1416.56	1018.52	1928.74	616.766	915.625	1.8386	0.264488
247	tr|A8K4C2|A8K4C2_HUMAN	Sulfhydryl oxidase OS=Homo sapiens OX=9606 PE=2 SV=1	-1.42415	0.17151	3770.5	4838.62	3463.27	5054.19	1231.02	2027.24	-1068.12	0.779251	-0.108323
248	sp|P00738|HPT_HUMAN	Haptoglobin OS=Homo sapiens OX=9606 GN=HP PE=1 SV=1	1.4228	0.1719	1.63773e+07	1.2106e+07	1.52837e+07	1.02172e+07	8.93278e+06	3.21379e+06	4.27131e+06	1.35283	0.131242
249	tr|B4DUV1|B4DUV1_HUMAN	Fibulin-1 OS=Homo sapiens OX=9606 PE=2 SV=1	1.42041	0.17258	5536.19	4270.52	5469.47	3311.83	1956.86	2027.48	1265.68	1.29638	0.112731
250	tr|A0A7S5EUT4|A0A7S5EUT4_HUMAN	IGH c1335_heavy_IGHV3-11_IGHD4-23_IGHJ4 (Fragment) OS=Homo sapiens OX=9606 PE=2 SV=1	-1.42025	0.17263	27628.7	57738.8	3398.21	68303.9	41396.6	52735	-30110.1	0.478512	-0.320108
251	tr|A0A5C2GV66|A0A5C2GV66_HUMAN	IG c1455_light_IGKV1D-39_IGKJ1 (Fragment) OS=Homo sapiens OX=9606 PE=2 SV=1	1.41527	0.17406	1303.48	857.115	1181.51	801.511	789.999	608.794	446.368	1.52078	0.182066
252	tr|A0A5C2GQG5|A0A5C2GQG5_HUMAN	IG c984_heavy_IGHV3-30_IGHD3-9_IGHJ4 (Fragment) OS=Homo sapiens OX=9606 PE=2 SV=1	1.40741	0.17634	1431.31	1024.64	1419.34	1063.12	685.448	604.233	406.674	1.3969	0.145164
253	tr|Q6FHW3|Q6FHW3_HUMAN	Adipsin OS=Homo sapiens OX=9606 GN=DF PE=2 SV=1	1.40583	0.1768	7658.74	5819.15	5828.76	5763.03	3715.67	1821.17	1839.59	1.31613	0.119298
254	tr|F2RM37|F2RM37_HUMAN	Christmas factor OS=Homo sapiens OX=9606 GN=F9 p22 PE=2 SV=1	1.39268	0.18068	16961.2	11999.4	13789.2	8116.28	8472.33	7426.44	4961.77	1.4135	0.150296
255	tr|A0A5C2GCN1|A0A5C2GCN1_HUMAN	IGH + IGL c438_light_IGLV1-47_IGLJ3 (Fragment) OS=Homo sapiens OX=9606 PE=2 SV=1	1.38784	0.18213	1428.44	988.104	1149.32	1018.91	895.858	451.815	440.34	1.44564	0.160061
256	tr|A0A7S5C4Y0|A0A7S5C4Y0_HUMAN	IGH c3952_heavy_IGHV1-24_IGHD1-26_IGHJ4 (Fragment) OS=Homo sapiens OX=9606 PE=2 SV=1	1.38669	0.18247	15409	9431.02	14026.7	8258.01	11349.4	7552.39	5978.03	1.63387	0.213217
257	tr|A0A5C2G5A5|A0A5C2G5A5_HUMAN	IGL c3045_light_IGLV1-44_IGLJ3 (Fragment) OS=Homo sapiens OX=9606 PE=2 SV=1	1.38472	0.18306	8494.85	6448.77	8009.52	5321.21	3587.86	2993.46	2046.08	1.31728	0.119679
258	tr|A0A7S5C523|A0A7S5C523_HUMAN	IGH c4012_heavy_IGHV2-70_IGHD3-9_IGHJ2 (Fragment) OS=Homo sapiens OX=9606 PE=2 SV=1	1.38271	0.18367	5285.93	3397.88	5602.71	2999.7	3771.44	2102.71	1888.05	1.55565	0.191913
259	tr|A0A7T0PXI8|A0A7T0PXI8_HUMAN	Immunglobulin heavy chain variable region (Fragment) OS=Homo sapiens OX=9606 PE=2 SV=1	-1.38264	0.18369	1253.96	1959.11	607.098	2069.76	1425.55	754.226	-705.152	0.640065	-0.193776
260	sp|Q9NZP8|C1RL_HUMAN	Complement C1r subcomponent-like protein OS=Homo sapiens OX=9606 GN=C1RL PE=1 SV=2	1.37757	0.18522	9394.14	7427.49	9430.13	7147.87	3934.52	2213.7	1966.64	1.26478	0.102015
261	tr|A0A024R8H7|A0A024R8H7_HUMAN	F-box and WD-40 domain protein 5, isoform CRA_a OS=Homo sapiens OX=9606 GN=FBXW5 PE=4 SV=1	1.37246	0.18678	8.15731e+06	5.5039e+06	7.93597e+06	7.95197e+06	3.77639e+06	4.80794e+06	2.65341e+06	1.4821	0.170876
262	tr|A0A5C2FXX9|A0A5C2FXX9_HUMAN	IGL c1742_light_IGKV3-20_IGKJ4 (Fragment) OS=Homo sapiens OX=9606 PE=2 SV=1	-1.36838	0.18803	3351.89	4908.48	3310.27	4403.94	1794.9	3117.43	-1556.6	0.682876	-0.165658
263	tr|A0A5C2G7P5|A0A5C2G7P5_HUMAN	IGH c537_heavy__IGHV1-46_IGHD1-26_IGHJ5 (Fragment) OS=Homo sapiens OX=9606 PE=2 SV=1	1.36573	0.18885	1543.18	1096.29	1525.28	876.89	669.15	789.275	446.893	1.40764	0.148492
264	tr|Q8WW79|Q8WW79_HUMAN	L-selectin OS=Homo sapiens OX=9606 GN=SELL PE=2 SV=1	1.35137	0.19332	3904.79	2853.46	3793.14	2482.21	905.183	2287.6	1051.33	1.36844	0.136226
265	tr|Q9NZS6|Q9NZS6_HUMAN	Elongation factor 1-alpha (Fragment) OS=Homo sapiens OX=9606 PE=2 SV=1	1.35092	0.19346	295.058	190.081	253.984	217.89	146.91	196.983	104.977	1.55228	0.190969
266	tr|A0A5C2GU62|A0A5C2GU62_HUMAN	IG c1045_light_IGKV1-16_IGKJ4 (Fragment) OS=Homo sapiens OX=9606 PE=2 SV=1	1.33884	0.19729	5906.53	3678.64	3571.71	3056.02	4719.9	2326.61	2227.89	1.60563	0.205645
267	tr|A0A5C2G445|A0A5C2G445_HUMAN	IGL c1073_light_IGKV1-5_IGKJ2 (Fragment) OS=Homo sapiens OX=9606 PE=2 SV=1	-1.32775	0.20085	655.066	1572.84	461.844	739.834	579.626	2107.59	-917.771	0.416487	-0.380399
268	sp|Q96PD5|PGRP2_HUMAN	N-acetylmuramoyl-L-alanine amidase OS=Homo sapiens OX=9606 GN=PGLYRP2 PE=1 SV=1	1.32161	0.20285	102133	89583.1	104555	75056.6	14641.9	26216.7	12549.7	1.14009	0.0569393
269	tr|A0A7S5EXS5|A0A7S5EXS5_HUMAN	IGH c2028_heavy_IGHV1-69_IGHD6-13_IGHJ3 (Fragment) OS=Homo sapiens OX=9606 PE=2 SV=1	1.32122	0.20298	9560	5154.68	5879.9	4376.33	10103.8	3014.44	4405.32	1.85462	0.268256
270	tr|B4DIK5|B4DIK5_HUMAN	cDNA FLJ57991, highly similar to Caspase recruitment domain-containing protein9 OS=Homo sapiens OX=9606 PE=2 SV=1	-1.31532	0.20491	61571.6	118371	7093.37	134357	91568.5	101308	-56799.8	0.520156	-0.283866
271	sp|P19652|A1AG2_HUMAN	Alpha-1-acid glycoprotein 2 OS=Homo sapiens OX=9606 GN=ORM2 PE=1 SV=2	1.31195	0.20602	587410	476589	538071	517099	222901	147196	110821	1.23253	0.0907969
272	tr|Q6FHE2|Q6FHE2_HUMAN	ICAM2 protein OS=Homo sapiens OX=9606 GN=ICAM2 PE=2 SV=1	1.30558	0.20814	2088.57	1194.7	1661.7	664.821	1551.19	1510.39	893.87	1.7482	0.242591
273	tr|A0A5C2GFB3|A0A5C2GFB3_HUMAN	IG c803_heavy_IGHV1-69_IGHD4-17_IGHJ6 (Fragment) OS=Homo sapiens OX=9606 PE=2 SV=1	1.29244	0.21255	4382.01	2709.48	4449.42	1544.54	3262.94	2469.8	1672.53	1.61729	0.208788
274	tr|A0A5C2G1F2|A0A5C2G1F2_HUMAN	IGL c1297_light_IGLV1-51_IGLJ3 (Fragment) OS=Homo sapiens OX=9606 PE=2 SV=1	1.28655	0.21455	6107.43	3592.25	4449.79	2650.47	5568.15	2686.04	2515.18	1.70017	0.230492
275	tr|A0A5C2GUI7|A0A5C2GUI7_HUMAN	IG c433_light_IGKV2D-29_IGKJ1 (Fragment) OS=Homo sapiens OX=9606 PE=2 SV=1	1.2837	0.21553	524.213	394.164	503.765	321.466	281.584	152.783	130.048	1.32993	0.12383
276	tr|E9PHK0|E9PHK0_HUMAN	Tetranectin OS=Homo sapiens OX=9606 GN=CLEC3B PE=1 SV=1	-1.26407	0.22233	31206.8	37355.8	31551	36274.5	7434.92	13466.8	-6149.05	0.835393	-0.0781094
277	tr|A0A5C2GRM8|A0A5C2GRM8_HUMAN	IG c1364_heavy_IGHV3-66_IGHD3-3_IGHJ4 (Fragment) OS=Homo sapiens OX=9606 PE=2 SV=1	1.26347	0.22254	1893.37	1253.29	1476.5	1287.15	1392.62	791.88	640.077	1.51072	0.179184
278	tr|A0A7S5C434|A0A7S5C434_HUMAN	IGH c3696_heavy_IGHV3-30_IGHD5-24_IGHJ6 (Fragment) OS=Homo sapiens OX=9606 PE=2 SV=1	1.26316	0.22265	8050.14	4688.39	5313.14	2914.16	6847.63	4892.75	3361.75	1.71704	0.23478
279	tr|A0A5C2G2B7|A0A5C2G2B7_HUMAN	IGL c3428_light_IGLV3-25_IGLJ2 (Fragment) OS=Homo sapiens OX=9606 PE=2 SV=1	1.2597	0.22387	2340.3	1573.13	1872.47	1548.21	1757.17	788.241	767.17	1.48767	0.172507
280	tr|A0A5C2GPU5|A0A5C2GPU5_HUMAN	IG c893_heavy_IGHV3-15_IGHD3-16_IGHJ4 (Fragment) OS=Homo sapiens OX=9606 PE=2 SV=1	-1.25877	0.2242	1321.14	2076.53	1185.84	1492.01	835.9	1703.66	-755.385	0.636227	-0.196388
281	tr|A0A7S5C2Y3|A0A7S5C2Y3_HUMAN	IGH c3238_heavy_IGHV4-34_IGHD3-22_IGHJ5 (Fragment) OS=Homo sapiens OX=9606 PE=2 SV=1	1.24273	0.22991	2313.05	1504.45	2006.44	1341.9	1584.29	1312.86	808.594	1.53747	0.186806
282	tr|A0A5C2GH36|A0A5C2GH36_HUMAN	IG c401_light_IGKV3-20_IGKJ4 (Fragment) OS=Homo sapiens OX=9606 PE=2 SV=1	-1.24186	0.23023	3427.19	4593.01	3140.69	4968.71	1387.32	2624.54	-1165.82	0.746175	-0.127159
283	tr|A0A7S5C0L1|A0A7S5C0L1_HUMAN	IGH c1115_heavy_IGHV5-51_IGHD3-22_IGHJ4 (Fragment) OS=Homo sapiens OX=9606 PE=2 SV=1	1.23491	0.23274	990.969	616.749	512.085	517.834	886.785	363.197	374.22	1.60676	0.205951
284	tr|H6VRG3|H6VRG3_HUMAN	Cytokeratin-1 OS=Homo sapiens OX=9606 GN=KRT1 PE=3 SV=1	-1.23256	0.2336	12561	24012	11538.8	14407	5030.81	28945.2	-11451.1	0.523111	-0.281406
285	sp|P01031|CO5_HUMAN	Complement C5 OS=Homo sapiens OX=9606 GN=C5 PE=1 SV=4	1.23117	0.2341	335429	302821	357226	310258	70371.2	45415.8	32607.9	1.10768	0.0444145
286	tr|A0A5C2GF74|A0A5C2GF74_HUMAN	IG c376_heavy_IGHV3-21_IGHD3-9_IGHJ4 (Fragment) OS=Homo sapiens OX=9606 PE=2 SV=1	1.22874	0.23499	4151.96	2761.26	3749.08	2529.39	2675.2	2377.67	1390.7	1.50365	0.177146
287	tr|Q5JVE7|Q5JVE7_HUMAN	Coagulation factor X OS=Homo sapiens OX=9606 GN=F10 PE=2 SV=1	1.2244	0.23658	58893.5	47602.6	62224.6	39587.2	17231.3	23525.5	11290.9	1.23719	0.0924365
288	tr|Q6MZU6|Q6MZU6_HUMAN	Uncharacterized protein DKFZp686C15213 OS=Homo sapiens OX=9606 GN=DKFZp686C15213 PE=2 SV=1	1.21524	0.23997	19566.5	13086.7	14662.8	12062.5	15126.4	7450.49	6479.84	1.49515	0.174684
289	tr|A0A5C2GJK9|A0A5C2GJK9_HUMAN	IG c95_heavy_IGHV3-23_IGHD6-25_IGHJ4 (Fragment) OS=Homo sapiens OX=9606 PE=2 SV=1	-1.21468	0.24018	2362.84	4483.28	1250.9	2337.19	2594.36	4872.68	-2120.43	0.527035	-0.278161
290	sp|P02741|CRP_HUMAN	C-reactive protein OS=Homo sapiens OX=9606 GN=CRP PE=1 SV=1	1.21015	0.24187	32063.2	18396.1	19083.2	10472.6	31925.7	16007.2	13667.2	1.74294	0.241282
291	tr|A0A5C2GDW3|A0A5C2GDW3_HUMAN	IGH + IGL c109_heavy_IGHV3-11_IGHD3-10_IGHJ4 (Fragment) OS=Homo sapiens OX=9606 PE=2 SV=1	1.20672	0.24316	1045.82	705.552	1201.48	563.388	806.725	379.9	340.27	1.48227	0.170929
292	tr|B2R4C5|B2R4C5_HUMAN	1,4-beta-N-acetylmuramidase C OS=Homo sapiens OX=9606 GN=LYZ PE=2 SV=1	1.20665	0.24319	2777.74	2061.33	3172.42	2193.85	1470.59	1167.23	716.415	1.34755	0.129545
293	tr|A0A5C2GN14|A0A5C2GN14_HUMAN	IG c1134_light_IGLV4-69_IGLJ2 (Fragment) OS=Homo sapiens OX=9606 PE=2 SV=1	-1.20332	0.24444	970.031	1400.69	807.472	1226.23	800.489	800.065	-430.661	0.692537	-0.159557
294	sp|P27169|PON1_HUMAN	Serum paraoxonase/arylesterase 1 OS=Homo sapiens OX=9606 GN=PON1 PE=1 SV=3	1.19957	0.24586	262460	223847	267828	212324	85221.1	55663.4	38612.6	1.1725	0.0691111
295	tr|A0A7S5ETW7|A0A7S5ETW7_HUMAN	IGH c90_heavy_IGHV3-48_IGHD1-14_IGHJ4 (Fragment) OS=Homo sapiens OX=9606 PE=2 SV=1	1.1988	0.24615	2606.17	1835.23	3345.62	2011.02	1662.05	1171.87	770.938	1.42008	0.152312
296	sp|P10643|CO7_HUMAN	Complement component C7 OS=Homo sapiens OX=9606 GN=C7 PE=1 SV=2	1.19218	0.24867	3758.81	2614.38	3576.84	2030.67	2227.96	2061.83	1144.43	1.43774	0.157681
297	tr|A0A5C2GG00|A0A5C2GG00_HUMAN	IG c1082_heavy_IGHV1-2_IGHD2-8_IGHJ6 (Fragment) OS=Homo sapiens OX=9606 PE=2 SV=1	1.19103	0.24911	1647.17	986.363	1395.42	634.667	1305.55	1172.07	660.804	1.66994	0.222701
298	sp|P18428|LBP_HUMAN	Lipopolysaccharide-binding protein OS=Homo sapiens OX=9606 GN=LBP PE=1 SV=3	-1.18877	0.24998	42136.4	62229.7	36116.1	40882.6	20390	49408.7	-20093.3	0.677111	-0.16934
299	sp|Q96IY4|CBPB2_HUMAN	Carboxypeptidase B2 OS=Homo sapiens OX=9606 GN=CPB2 PE=1 SV=2	-1.18605	0.25102	41638	46173.4	37904.7	45439.3	9134.31	7923.93	-4535.37	0.901775	-0.0449017
300	sp|P00734|THRB_HUMAN	Prothrombin OS=Homo sapiens OX=9606 GN=F2 PE=1 SV=2	1.18153	0.25277	484901	444547	504854	434475	89839.2	59945.7	40353.2	1.09077	0.0377346
301	tr|A0A5C2G3L4|A0A5C2G3L4_HUMAN	IGL c883_light_IGKV3-15_IGKJ1 (Fragment) OS=Homo sapiens OX=9606 PE=2 SV=1	1.17765	0.25427	3358.32	2231.98	2818.7	1583.74	2631.59	1490.78	1126.35	1.50464	0.177433
302	sp|P0C0L5|CO4B_HUMAN	Complement C4-B OS=Homo sapiens OX=9606 GN=C4B PE=1 SV=2	1.17569	0.25503	63716.9	53103.2	66371.6	47837	22498.2	17573	10613.7	1.19987	0.079134
303	sp|P07996|TSP1_HUMAN	Thrombospondin-1 OS=Homo sapiens OX=9606 GN=THBS1 PE=1 SV=2	-1.17384	0.25576	50970.4	61649.4	50003.5	65264.6	19783.3	20886.8	-10678.9	0.82678	-0.0826103
304	tr|B4E1D8|B4E1D8_HUMAN	cDNA FLJ51597, highly similar to C4b-binding protein alpha chain OS=Homo sapiens OX=9606 PE=2 SV=1	1.17293	0.25611	15728.5	9645.72	12107.8	8460.72	15892.3	4047.3	6082.78	1.63062	0.212353
305	tr|A0A5C2G6A9|A0A5C2G6A9_HUMAN	IGL c4180_light_IGLV2-14_IGLJ1 (Fragment) OS=Homo sapiens OX=9606 PE=2 SV=1	1.16822	0.25796	1306.12	795.303	854.452	534.433	1189.92	704.303	510.813	1.64229	0.215449
306	tr|Q71VH6|Q71VH6_HUMAN	1-acyl-sn-glycerol-3-phosphate acyltransferase (Fragment) OS=Homo sapiens OX=9606 PE=2 SV=1	-1.16767	0.25818	1578.12	2429.55	1278.17	1675.93	1205.83	1965.42	-851.429	0.649553	-0.187385
307	tr|A0A5C2GJ36|A0A5C2GJ36_HUMAN	IG c844_light_IGKV2D-29_IGKJ4 (Fragment) OS=Homo sapiens OX=9606 PE=2 SV=1	1.16547	0.25904	3638.58	2912.59	3695.33	2609.1	969.587	1714.67	725.983	1.24926	0.0966516
308	tr|Q6MZX7|Q6MZX7_HUMAN	Uncharacterized protein DKFZp686M24218 OS=Homo sapiens OX=9606 GN=DKFZp686M24218 PE=2 SV=1	1.16507	0.2592	386571	290674	301720	285480	234845	112241	95897.8	1.32992	0.123824
309	tr|A0A5C2GJB1|A0A5C2GJB1_HUMAN	IG c45_light_IGKV3-20_IGKJ2 (Fragment) OS=Homo sapiens OX=9606 PE=2 SV=1	1.16364	0.25976	23678.1	18478.7	22222.8	13629.8	6981.66	12284.6	5199.47	1.28138	0.107677
310	tr|A0A5C2GQ84|A0A5C2GQ84_HUMAN	IG c1556_heavy_IGHV3-48_IGHD6-19_IGHJ6 (Fragment) OS=Homo sapiens OX=9606 PE=2 SV=1	1.15953	0.26139	1432.03	1066.21	1402.81	864.081	690.648	719.988	365.828	1.34311	0.128112
311	tr|Q86TT1|Q86TT1_HUMAN	Full-length cDNA clone CS0DD006YL02 of Neuroblastoma of Homo sapiens (human) OS=Homo sapiens OX=9606 PE=2 SV=1	1.15762	0.26215	198402	133017	115259	114253	157062	85050.2	65384.8	1.49155	0.173639
312	tr|A0A5C2GUL4|A0A5C2GUL4_HUMAN	IG c1215_light_IGKV3-15_IGKJ2 (Fragment) OS=Homo sapiens OX=9606 PE=2 SV=1	1.15202	0.26438	3814.24	2691.78	3771.19	2683.14	2456.44	1859.89	1122.45	1.41699	0.151367
313	tr|D3DQH8|D3DQH8_HUMAN	Osteonectin OS=Homo sapiens OX=9606 GN=SPARC PE=3 SV=1	1.14963	0.26534	1138.91	891.03	1230.04	761.619	538.525	418.233	247.885	1.2782	0.106599
314	sp|P05546|HEP2_HUMAN	Heparin cofactor 2 OS=Homo sapiens OX=9606 GN=SERPIND1 PE=1 SV=3	1.14764	0.26614	265211	236659	255872	224538	59719	51217.6	28552	1.12065	0.0494686
315	tr|A0A5C2G1U7|A0A5C2G1U7_HUMAN	IGL c3139_light_IGKV1-5_IGKJ4 (Fragment) OS=Homo sapiens OX=9606 PE=2 SV=1	1.14667	0.26653	1646.93	857.019	1047.18	846.196	2124.26	482.715	789.912	1.9217	0.283685
316	tr|A0A7S5C1U8|A0A7S5C1U8_HUMAN	IGH c2663_heavy_IGHV5-51_IGHD3-10_IGHJ4 (Fragment) OS=Homo sapiens OX=9606 PE=2 SV=1	-1.14394	0.26764	1142.56	1810.13	965.556	1526.37	889.515	1616.88	-667.567	0.631204	-0.19983
317	tr|Q1HP67|Q1HP67_HUMAN	Lipoprotein, Lp(A) OS=Homo sapiens OX=9606 GN=LPA PE=4 SV=1	1.14367	0.26774	43885.4	25819.2	25508.2	17878.3	45452.8	20721.2	18066.1	1.69971	0.230376
318	tr|A0A5C2GDU6|A0A5C2GDU6_HUMAN	IG c1122_heavy_IGHV3-13_IGHD2-15_IGHJ6 (Fragment) OS=Homo sapiens OX=9606 PE=2 SV=1	1.14166	0.26856	4516.42	3378.37	3872.19	2989.02	2778.91	1488.12	1138.05	1.33686	0.126087
319	tr|A0A5C2H1D3|A0A5C2H1D3_HUMAN	IG c716_light_IGLV1-40_IGLJ3 (Fragment) OS=Homo sapiens OX=9606 PE=2 SV=1	1.13788	0.27009	21738.5	15435.6	14730.5	16090.6	16491.4	5904.6	6302.96	1.40834	0.148707
320	tr|A0A5C2G4D1|A0A5C2G4D1_HUMAN	IGL c3420_light_IGLV3-1_IGLJ2 (Fragment) OS=Homo sapiens OX=9606 PE=2 SV=1	1.12894	0.27374	1153.63	877.565	1021.1	750.804	570.15	522.385	276.062	1.31458	0.118786
321	tr|V9HW12|V9HW12_HUMAN	Epididymis secretory sperm binding protein Li 2a OS=Homo sapiens OX=9606 GN=HEL-S-2a PE=2 SV=1	1.12399	0.27578	5580.7	2413.39	1881.22	2226.89	8795.51	1430.27	3167.31	2.31239	0.364062
322	tr|B4DZ36|B4DZ36_HUMAN	cDNA FLJ58441, highly similar to Attractin OS=Homo sapiens OX=9606 PE=2 SV=1	1.11824	0.27817	35442.2	32564.7	35664.1	32669.2	4053.58	7055.67	2877.47	1.08836	0.0367732
323	tr|E9KL26|E9KL26_HUMAN	Epididymis tissue protein Li 173 OS=Homo sapiens OX=9606 GN=SERPING1 PE=2 SV=1	-1.11762	0.27842	668985	811200	575733	786108	331041	228760	-142215	0.824686	-0.0837114
324	tr|A0A5C2FVI2|A0A5C2FVI2_HUMAN	IGL c1041_light_IGLV2-14_IGLJ1 (Fragment) OS=Homo sapiens OX=9606 PE=2 SV=1	1.11571	0.27922	1582.64	1181.92	1516.12	1184.93	983.986	567.185	400.714	1.33904	0.126792
325	tr|A0A5C2GUE5|A0A5C2GUE5_HUMAN	IG c1144_light_IGKV1-5_IGKJ4 (Fragment) OS=Homo sapiens OX=9606 PE=2 SV=1	1.11541	0.27934	3070.97	1912.15	2549.58	1313.71	2919.06	1507.52	1158.82	1.60603	0.205754
326	tr|A0A5C2G7M3|A0A5C2G7M3_HUMAN	IGL c3685_light_IGKV3-11_IGKJ4 (Fragment) OS=Homo sapiens OX=9606 PE=2 SV=1	1.10353	0.28433	49338.8	36784.1	48937.4	30032.3	15081.1	32663.3	12554.7	1.34131	0.127528
327	tr|A0A5C2GVG5|A0A5C2GVG5_HUMAN	IG c537_heavy_IGHV3-74_IGHD1-26_IGHJ6 (Fragment) OS=Homo sapiens OX=9606 PE=2 SV=1	1.1032	0.28447	797.068	582.388	658.73	591.303	574.455	220.63	214.679	1.36862	0.136283
328	tr|A0A7T0PYQ4|A0A7T0PYQ4_HUMAN	Immunglobulin heavy chain variable region (Fragment) OS=Homo sapiens OX=9606 PE=2 SV=1	1.10294	0.28458	4564	3427.4	4566.12	2542.37	1776.53	2731.95	1136.6	1.33162	0.124381
329	tr|C0JYY2|C0JYY2_HUMAN	Apolipoprotein B (Including Ag(X) antigen) OS=Homo sapiens OX=9606 GN=APOB PE=4 SV=1	-1.09994	0.28585	1.15558e+06	1.38203e+06	1.21966e+06	1.26016e+06	485924	433237	-226442	0.836152	-0.0777145
330	tr|A0A5C2GT85|A0A5C2GT85_HUMAN	IG c721_heavy_IGHV3-33_IGHD3-10_IGHJ6 (Fragment) OS=Homo sapiens OX=9606 PE=2 SV=1	-1.09651	0.28731	1092.04	2707.53	825.959	1239.08	939.086	4563.39	-1615.49	0.403333	-0.394336
331	tr|A0A5C2GNK8|A0A5C2GNK8_HUMAN	IG c120_heavy_IGHV1-8_IGHD1-7_IGHJ6 (Fragment) OS=Homo sapiens OX=9606 PE=2 SV=1	1.0935	0.28859	2988.36	2079.48	3194.46	1836.04	2291.03	1288.18	908.876	1.43707	0.157478
332	tr|A0A5C2GIT4|A0A5C2GIT4_HUMAN	IG c17_heavy_IGHV5-51_IGHD5-12_IGHJ6 (Fragment) OS=Homo sapiens OX=9606 PE=2 SV=1	1.0873	0.29125	970.927	489.708	418.063	235.07	1317.99	470.829	481.218	1.98266	0.297249
333	sp|P43652|AFAM_HUMAN	Afamin OS=Homo sapiens OX=9606 GN=AFM PE=1 SV=1	-1.082	0.29354	291787	332803	278986	334885	102802	61654.5	-41015.6	0.876757	-0.0571208
334	tr|A0A5C2G3L5|A0A5C2G3L5_HUMAN	IGL c2027_light_IGLV1-40_IGLJ3 (Fragment) OS=Homo sapiens OX=9606 PE=2 SV=1	-1.07968	0.29454	4385.77	8218.95	4608.16	4181.06	2907.82	10843.9	-3833.19	0.533616	-0.272771
335	tr|A0A5C2GX92|A0A5C2GX92_HUMAN	IG c1207_heavy_IGHV3-23_IGHD1-26_IGHJ1 (Fragment) OS=Homo sapiens OX=9606 PE=2 SV=1	1.07639	0.29597	4905.17	3632.32	3877.48	4371.22	3000.4	2231.87	1272.86	1.35043	0.130471
336	tr|A0A5C2GXR5|A0A5C2GXR5_HUMAN	IG c500_light_IGKV2-28_IGKJ1 (Fragment) OS=Homo sapiens OX=9606 PE=2 SV=1	1.07509	0.29654	1922.92	1449.82	1731.6	1345.82	1232.14	646.821	473.105	1.32632	0.122648
337	tr|A0A5C2G7R2|A0A5C2G7R2_HUMAN	IGL c3747_light_IGLV2-8_IGLJ2 (Fragment) OS=Homo sapiens OX=9606 PE=2 SV=1	-1.07283	0.29752	17207.2	22162.7	13461.4	24898.6	9764.31	10863.6	-4955.5	0.776403	-0.109913
338	tr|A0A5C2G5I3|A0A5C2G5I3_HUMAN	IGL c3115_light_IGLV7-46_IGLJ1 (Fragment) OS=Homo sapiens OX=9606 PE=2 SV=1	-1.0684	0.29946	7358.75	10756.8	5831.55	9551.33	6220.41	7903.18	-3398.02	0.684104	-0.164878
339	tr|B4E1C2|B4E1C2_HUMAN	Bradykinin OS=Homo sapiens OX=9606 GN=KNG1 PE=2 SV=1	-1.06778	0.29973	2094.03	2560.34	1841.85	2539.71	1160.83	748.106	-466.314	0.81787	-0.0873156
340	tr|A0A5C2GF52|A0A5C2GF52_HUMAN	IG c259_heavy_IGHV1-2_IGHD3-16_IGHJ3 (Fragment) OS=Homo sapiens OX=9606 PE=2 SV=1	1.06331	0.3017	1498.1	945.042	1502.18	468.779	1268.14	1047.47	553.059	1.58522	0.20009
341	tr|A0A5C2G8S1|A0A5C2G8S1_HUMAN	IGH c324_heavy__IGHV4-39_IGHD5-24_IGHJ2 (Fragment) OS=Homo sapiens OX=9606 PE=2 SV=1	-1.0632	0.30175	927.305	3087.16	682.447	877.684	1025.93	6341.63	-2159.85	0.300375	-0.522336
342	tr|A0A5C2G466|A0A5C2G466_HUMAN	IGL c3972_light_IGLV3-21_IGLJ2 (Fragment) OS=Homo sapiens OX=9606 PE=2 SV=1	1.06301	0.30183	845.562	545.855	462.742	362.125	785.843	421.146	299.708	1.54906	0.190068
343	tr|W6MEN4|W6MEN4_HUMAN	Beta-1,4-galactosyltransferase 1 OS=Homo sapiens OX=9606 GN=B4GALT1 PE=2 SV=1	-1.06205	0.30225	389.05	517.317	374.763	482.775	203.194	323.377	-128.267	0.752053	-0.123751
344	tr|Q59G97|Q59G97_HUMAN	EGF-containing fibulin-like extracellular matrix protein 1 isoform b variant (Fragment) OS=Homo sapiens OX=9606 PE=4 SV=1	1.05706	0.30446	2695.73	2164.35	2622.98	2279.27	1326.3	876.321	531.379	1.24551	0.0953486
345	tr|A0A7S5C443|A0A7S5C443_HUMAN	IGH c3204_heavy_IGHV4-39_IGHD4-23_IGHJ5 (Fragment) OS=Homo sapiens OX=9606 PE=2 SV=1	-1.05355	0.30603	396.441	650.872	420.308	334.85	220.95	731.028	-254.432	0.609091	-0.215318
346	tr|L8E853|L8E853_HUMAN	von Willebrand factor OS=Homo sapiens OX=9606 GN=VWF PE=1 SV=1	1.05288	0.30633	35854.6	25373.6	22498	17403.1	25778.2	18067	10481	1.41307	0.150162
347	tr|A0A5C2GZ35|A0A5C2GZ35_HUMAN	IG c918_light_IGKV1-27_IGKJ1 (Fragment) OS=Homo sapiens OX=9606 PE=2 SV=1	1.04891	0.3081	9509.63	6589.78	7088.03	6406.05	7388.65	4785.18	2919.85	1.44309	0.159293
348	sp|P13671|CO6_HUMAN	Complement component C6 OS=Homo sapiens OX=9606 GN=C6 PE=1 SV=3	1.0453	0.30972	7342.43	4294.64	5232.64	3589.55	8723.24	2986.26	3047.79	1.70967	0.232913
349	tr|Q5STZ8|Q5STZ8_HUMAN	ATP-binding cassette sub-family F member 1 OS=Homo sapiens OX=9606 GN=ABCF1 PE=1 SV=10	-1.03943	0.31237	36487.6	40420	34498.6	36986.8	5868.8	10425.3	-3932.42	0.902711	-0.0444512
350	tr|A0A5C2GGF5|A0A5C2GGF5_HUMAN	IGL c499_light_IGKV1-5_IGKJ2 (Fragment) OS=Homo sapiens OX=9606 PE=2 SV=1	1.03243	0.31554	8036.53	6212.65	7446.01	6066.11	3415.72	4420.55	1823.88	1.29357	0.111792
351	tr|A8K1K1|A8K1K1_HUMAN	cDNA FLJ76342, highly similar to Homo sapiens carnosine dipeptidase 1 (metallopeptidase M20 family)(CNDP1), mRNA OS=Homo sapiens OX=9606 PE=2 SV=1	-1.029	0.31711	26943.7	30700.3	26381	27419.3	8493.01	7819.58	-3756.6	0.877636	-0.0566854
352	tr|A0A5C2H133|A0A5C2H133_HUMAN	IG c1618_light_IGKV1-5_IGKJ4 (Fragment) OS=Homo sapiens OX=9606 PE=2 SV=1	-1.02525	0.31882	1646.45	2194.66	1336.02	2020.59	852.511	1460.23	-548.206	0.750209	-0.124818
353	tr|A0A5C2GS77|A0A5C2GS77_HUMAN	IG c1524_heavy_IGHV3-21_IGHD6-19_IGHJ6 (Fragment) OS=Homo sapiens OX=9606 PE=2 SV=1	1.02357	0.3196	2972.26	2361.66	2514.55	1988.88	1540.45	1088.85	610.597	1.25855	0.0998688
354	tr|V9GZN0|V9GZN0_HUMAN	Uncharacterized protein (Fragment) OS=Homo sapiens OX=9606 PE=3 SV=1	1.02157	0.32052	5918.04	3561.62	2497.21	3220.24	6741.38	2785.93	2356.42	1.66162	0.220531
355	tr|A0A7T0LNV7|A0A7T0LNV7_HUMAN	Immunglobulin heavy chain variable region (Fragment) OS=Homo sapiens OX=9606 PE=2 SV=1	-1.01948	0.32148	3716.3	15350.3	2180.5	4314.79	3825.97	35883.3	-11634	0.2421	-0.616005
356	tr|A0A7S5EW56|A0A7S5EW56_HUMAN	IGH c123_heavy_IGHV3-23_IGHD1-26_IGHJ4 (Fragment) OS=Homo sapiens OX=9606 PE=2 SV=1	1.0166	0.32282	1717.38	873.511	875.741	710.919	2548.89	627.465	843.871	1.96607	0.293599
357	tr|A0A5C2FVB4|A0A5C2FVB4_HUMAN	IGL c988_light_IGLV2-23_IGLJ1 (Fragment) OS=Homo sapiens OX=9606 PE=2 SV=1	-1.01027	0.32576	1915.67	2602.45	1545.22	2554.81	1243	1753.94	-686.788	0.7361	-0.133063
358	tr|B2R815|B2R815_HUMAN	cDNA, FLJ93695, highly similar to Homo sapiens serpin peptidase inhibitor, clade A (alpha-1 antiproteinase, antitrypsin), member 4 (SERPINA4), mRNA OS=Homo sapiens OX=9606 PE=2 SV=1	-1.00965	0.32604	63428.3	71889.7	58657.9	70579.6	23382.9	12472.6	-8461.37	0.882301	-0.0543834
359	tr|A0A5C2FU04|A0A5C2FU04_HUMAN	IGL c441_light_IGKV3D-15_IGKJ1 (Fragment) OS=Homo sapiens OX=9606 PE=2 SV=1	0.99964	0.33073	16750.7	13204.8	15708.2	11699.9	7498.74	8342.3	3545.91	1.26853	0.103301
360	tr|A0A5C2GBZ9|A0A5C2GBZ9_HUMAN	IGH + IGL c178_light_IGKV3-15_IGKJ5 (Fragment) OS=Homo sapiens OX=9606 PE=2 SV=1	-0.999566	0.33077	622.746	1219.1	504.928	477.761	459.973	1829.72	-596.354	0.510824	-0.291728
361	tr|A0A5C2G8R9|A0A5C2G8R9_HUMAN	IGL c205_light_IGKV4-1_IGKJ1 (Fragment) OS=Homo sapiens OX=9606 PE=2 SV=1	0.990796	0.33492	629.295	436.887	377.794	382.542	562.376	246.681	192.408	1.44041	0.158485
362	tr|A0A7S5BZY8|A0A7S5BZY8_HUMAN	IGH c1014_heavy_IGHV3-74_IGHD5-24_IGHJ4 (Fragment) OS=Homo sapiens OX=9606 PE=2 SV=1	0.987518	0.33648	643	498.999	545.959	482.263	376.397	266.389	144.001	1.28858	0.110111
363	tr|A0A7S5BZL6|A0A7S5BZL6_HUMAN	IGH c620_heavy_IGHV1-69_IGHD3-22_IGHJ4 (Fragment) OS=Homo sapiens OX=9606 PE=2 SV=1	-0.984426	0.33795	1654.16	2302.2	1477.76	1896.47	1008.63	1821.01	-648.035	0.718515	-0.143564
364	tr|A0A5C2FXT8|A0A5C2FXT8_HUMAN	IGL c1454_light_IGKV1D-39_IGKJ1 (Fragment) OS=Homo sapiens OX=9606 PE=2 SV=1	0.981357	0.33942	2537.06	1743.94	2442.47	1107.16	1894.14	1715.76	793.117	1.45478	0.162798
365	tr|A0A087X1J7|A0A087X1J7_HUMAN	Glutathione peroxidase OS=Homo sapiens OX=9606 GN=GPX3 PE=1 SV=1	-0.979896	0.34013	29761.7	34235.9	30010.6	36770.6	9645.96	10744.1	-4474.16	0.869314	-0.0608235
366	tr|A0A7S5C1T3|A0A7S5C1T3_HUMAN	IGH c1790_heavy_IGHV4-39_IGHD6-13_IGHJ4 (Fragment) OS=Homo sapiens OX=9606 PE=2 SV=1	0.979781	0.34018	7612.12	4905.45	3856.17	3341.73	7545.41	4402.54	2706.67	1.55177	0.190827
367	tr|A0A5C2H0J1|A0A5C2H0J1_HUMAN	IG c1458_light_IGKV2-30_IGKJ1 (Fragment) OS=Homo sapiens OX=9606 PE=2 SV=1	0.970664	0.34458	6707.16	5171.81	5606.73	5047.19	3968.24	3045.08	1535.35	1.29687	0.112896
368	tr|A0A5C2FY76|A0A5C2FY76_HUMAN	IGL c575_light_IGKV1-12_IGKJ4 (Fragment) OS=Homo sapiens OX=9606 PE=2 SV=1	-0.953402	0.35302	651.854	855.454	592.359	837.927	457.929	496.327	-203.6	0.761998	-0.118046
369	tr|D3DRR6|D3DRR6_HUMAN	Inter-alpha (Globulin) inhibitor H2, isoform CRA_a OS=Homo sapiens OX=9606 GN=ITIH2 PE=3 SV=1	-0.948256	0.35556	599996	654825	586271	701060	104539	150016	-54829.6	0.916268	-0.0379773
370	tr|D6RAR4|D6RAR4_HUMAN	Hepatocyte growth factor activator OS=Homo sapiens OX=9606 GN=HGFAC PE=1 SV=1	0.944026	0.35766	6378.43	5016.14	5849.9	3435.35	2725.42	3660.11	1362.29	1.27158	0.104344
371	tr|A0A5C2GRL6|A0A5C2GRL6_HUMAN	IG c105_light_IGLV8-61_IGLJ3 (Fragment) OS=Homo sapiens OX=9606 PE=2 SV=1	-0.928978	0.36519	2985.81	4141.45	2834.03	2197.29	2046.6	3359.56	-1155.64	0.720957	-0.142091
372	tr|A0A5C2GE26|A0A5C2GE26_HUMAN	IG c1327_heavy_IGHV3-21_IGHD3-3_IGHJ6 (Fragment) OS=Homo sapiens OX=9606 PE=2 SV=1	0.924229	0.36759	3375.71	2257.86	2467.4	1049.38	2893.68	2501.07	1117.85	1.49509	0.174668
373	tr|A0A5C2GYP7|A0A5C2GYP7_HUMAN	IG c768_light_IGKV1-9_IGKJ4 (Fragment) OS=Homo sapiens OX=9606 PE=2 SV=1	-0.918813	0.37034	1626.43	2093.23	1571.24	2095.57	875.313	1347.19	-466.798	0.776996	-0.109581
374	sp|Q92496|FHR4_HUMAN	Complement factor H-related protein 4 OS=Homo sapiens OX=9606 GN=CFHR4 PE=1 SV=3	0.91548	0.37204	4835.05	3675.39	5031.63	3924.6	3660.39	1627.03	1159.65	1.31552	0.119097
375	tr|A0A5C2G456|A0A5C2G456_HUMAN	IGL c2247_light_IGLV1-36_IGLJ3 (Fragment) OS=Homo sapiens OX=9606 PE=2 SV=1	0.909843	0.37493	2653.64	1983.23	2188.33	1762.43	1901.64	1346.49	670.406	1.33804	0.126468
376	tr|B0YIW2|B0YIW2_HUMAN	Apolipoprotein C-III OS=Homo sapiens OX=9606 GN=APOC3 PE=1 SV=1	-0.908145	0.3758	132430	152353	121526	162540	64550.7	25416.8	-19923	0.869232	-0.0608645
377	tr|V9HVY1|V9HVY1_HUMAN	Fibrinogen beta chain OS=Homo sapiens OX=9606 GN=HEL-S-78p PE=2 SV=1	0.897583	0.38126	11335.5	10123.8	11017.1	10530	2540.93	3430.33	1211.69	1.11969	0.0490968
378	tr|A8K8Z4|A8K8Z4_HUMAN	Complement component C6 OS=Homo sapiens OX=9606 PE=2 SV=1	-0.886152	0.38722	5355.14	6193.77	4590.6	5712.77	2057.21	2173.5	-838.631	0.864601	-0.0631843
379	tr|A0A5C2GT20|A0A5C2GT20_HUMAN	IG c1854_heavy_IGHV3-23_IGHD3-3_IGHJ6 (Fragment) OS=Homo sapiens OX=9606 PE=2 SV=1	0.873312	0.39399	3899.69	2965.93	3049.09	3410.46	3003.18	1553.41	933.758	1.31483	0.118869
380	tr|A0A5C2GY12|A0A5C2GY12_HUMAN	IG c538_light_IGLV6-57_IGLJ3 (Fragment) OS=Homo sapiens OX=9606 PE=2 SV=1	0.871794	0.3948	937.828	682.549	613.49	507.329	786.224	489.167	255.278	1.37401	0.137989
381	sp|P01871|IGHM_HUMAN	Immunoglobulin heavy constant mu OS=Homo sapiens OX=9606 GN=IGHM PE=1 SV=4	-0.868504	0.39655	236166	275880	265909	287625	70846.9	126054	-39713.5	0.856048	-0.067502
382	tr|A0A5C2GII9|A0A5C2GII9_HUMAN	IG c1081_light_IGKV1-8_IGKJ4 (Fragment) OS=Homo sapiens OX=9606 PE=2 SV=1	0.867879	0.39688	2434.14	2018.89	2465.14	2133.33	1038.6	1100.26	415.247	1.20568	0.0812324
383	tr|A0A384MDQ7|A0A384MDQ7_HUMAN	Epididymis secretory sperm binding protein OS=Homo sapiens OX=9606 PE=2 SV=1	0.865455	0.39818	1.00614e+06	689784	553504	445256	1.01003e+06	562149	316357	1.45863	0.163946
384	tr|A0A5C2GHF4|A0A5C2GHF4_HUMAN	IG c486_light_IGKV3-20_IGKJ2 (Fragment) OS=Homo sapiens OX=9606 PE=2 SV=1	-0.865238	0.39829	4315.79	5766.48	2947.5	5090.59	3716.49	3781.4	-1450.69	0.748427	-0.125851
385	sp|Q15485|FCN2_HUMAN	Ficolin-2 OS=Homo sapiens OX=9606 GN=FCN2 PE=1 SV=2	0.86098	0.40057	5499.48	4777.78	5102.58	4387.44	1974.53	1768.51	721.705	1.15105	0.0610959
386	tr|Q53GU8|Q53GU8_HUMAN	Transforming growth factor-beta-induced protein ig-h3 (Fragment) OS=Homo sapiens OX=9606 PE=2 SV=1	-0.856246	0.40312	4913.61	5881.26	4252.09	5273.9	2148.46	2855.79	-967.65	0.835469	-0.0780697
387	tr|A0A5C2G4D8|A0A5C2G4D8_HUMAN	IGL c4168_light_IGKV3-15_IGKJ2 (Fragment) OS=Homo sapiens OX=9606 PE=2 SV=1	0.854972	0.4038	1528.52	1128.9	1302.17	1120.91	1302.77	698.194	399.619	1.35399	0.131616
388	tr|A0A5C2GKA9|A0A5C2GKA9_HUMAN	IG c293_heavy_IGHV3-48_IGHD2-2_IGHJ4 (Fragment) OS=Homo sapiens OX=9606 PE=2 SV=1	0.853328	0.40469	6173.4	4556.82	6195.46	2859.56	4715.97	3694.39	1616.58	1.35476	0.131862
389	tr|A0A7T0PXT4|A0A7T0PXT4_HUMAN	Immunglobulin heavy chain variable region (Fragment) OS=Homo sapiens OX=9606 PE=2 SV=1	0.851439	0.40571	5149.14	4200.85	5527.63	5006.47	2505.48	2475.26	948.289	1.22574	0.0883975
390	sp|P48740|MASP1_HUMAN	Mannan-binding lectin serine protease 1 OS=Homo sapiens OX=9606 GN=MASP1 PE=1 SV=3	0.845833	0.40875	1681.01	1367.89	1867.61	1332.05	742.975	904.62	313.112	1.2289	0.089517
391	tr|L7UYB8|L7UYB8_HUMAN	Glycoprotein Ib alpha polypeptide G942 deletion mutant OS=Homo sapiens OX=9606 GN=GP1BA PE=2 SV=1	0.839201	0.41236	4383.92	3592.87	4487.22	2807.08	1749.29	2413.6	791.056	1.22017	0.0864218
392	tr|A0A5C2G922|A0A5C2G922_HUMAN	IGH c434_heavy__IGHV3-49_IGHD2-21_IGHJ4 (Fragment) OS=Homo sapiens OX=9606 PE=2 SV=1	0.839187	0.41237	1953.97	1338.47	1147.11	665.747	2056.16	1073.21	615.506	1.45986	0.164311
393	tr|A0A5C2GNU3|A0A5C2GNU3_HUMAN	IG c227_heavy_IGHV3-53_IGHD3-10_IGHJ4 (Fragment) OS=Homo sapiens OX=9606 PE=2 SV=1	-0.838019	0.41301	11821.3	13808.3	12639.6	14618.5	4529.38	5975.38	-1987.01	0.8561	-0.0674753
394	tr|A0A7S5C0T8|A0A7S5C0T8_HUMAN	IGH c1220_heavy_IGHV3-7_IGHD3-3_IGHJ4 (Fragment) OS=Homo sapiens OX=9606 PE=2 SV=1	0.835371	0.41446	2213.15	1713.05	1309.75	1714.6	1639.36	946.795	500.101	1.29194	0.111241
395	tr|A0A5C2FVU8|A0A5C2FVU8_HUMAN	IGL c1049_light_IGLV1-40_IGLJ2 (Fragment) OS=Homo sapiens OX=9606 PE=2 SV=1	0.834683	0.41484	1973.08	983.057	317.019	589.151	3528.24	1272.76	990.02	2.00708	0.302565
396	tr|A0A5C2G9X9|A0A5C2G9X9_HUMAN	IGH + IGL c18_light_IGKV2-30_IGKJ1 (Fragment) OS=Homo sapiens OX=9606 PE=2 SV=1	0.830094	0.41736	9838.95	7391.18	6778.99	5328.74	7697.32	5263.53	2447.77	1.33117	0.124235
397	tr|G3V2W1|G3V2W1_HUMAN	Protein Z-dependent protease inhibitor OS=Homo sapiens OX=9606 GN=SERPINA10 PE=1 SV=1	-0.826658	0.41925	27029.6	33764.4	28691.8	25987.4	7920.02	24515.4	-6734.76	0.800536	-0.0966189
398	tr|A0A5C2GJF3|A0A5C2GJF3_HUMAN	IG c1186_heavy_IGHV3-20_IGHD6-13_IGHJ6 (Fragment) OS=Homo sapiens OX=9606 PE=2 SV=1	0.818345	0.42386	815.658	651.71	751.909	506.961	507.027	379.85	163.947	1.25156	0.0974534
399	tr|A0A384MR03|A0A384MR03_HUMAN	Fibronectin OS=Homo sapiens OX=9606 PE=2 SV=1	0.817974	0.42407	356622	304371	295934	260436	162852	119521	52251.8	1.17167	0.068806
400	tr|A0A5C2GQB1|A0A5C2GQB1_HUMAN	IG c1522_heavy_IGHV3-53_IGHD2-21_IGHJ4 (Fragment) OS=Homo sapiens OX=9606 PE=2 SV=1	-0.813458	0.42659	5005.16	6648.9	3766.39	3995.85	3536.87	5321.87	-1643.75	0.75278	-0.123332
401	tr|A0A5C2FXA4|A0A5C2FXA4_HUMAN	IGL c1611_light_IGKV3-11_IGKJ5 (Fragment) OS=Homo sapiens OX=9606 PE=2 SV=1	0.808318	0.42946	35162.4	28406.1	30549.8	22098.6	17690.6	19638.8	6756.31	1.23785	0.0926668
402	tr|H0Y755|H0Y755_HUMAN	Low affinity immunoglobulin gamma Fc region receptor III-A OS=Homo sapiens OX=9606 GN=FCGR3A PE=1 SV=3	-0.793684	0.43772	4799.22	6132.55	5096.43	5356.99	2435.7	4721.07	-1333.32	0.782583	-0.10647
403	tr|A0A5C2G403|A0A5C2G403_HUMAN	IGL c2187_light_IGKV4-1_IGKJ2 (Fragment) OS=Homo sapiens OX=9606 PE=2 SV=1	-0.785136	0.44259	6259.91	8947.07	4240.05	5650.15	5611.11	9254.94	-2687.17	0.69966	-0.155113
404	tr|A0A7T0PWY8|A0A7T0PWY8_HUMAN	Immunglobulin heavy chain variable region (Fragment) OS=Homo sapiens OX=9606 PE=2 SV=1	0.776664	0.44744	4759.5	3701.43	4422.23	3492.86	3724.3	2165.42	1058.07	1.28585	0.109192
405	tr|B2R6W1|B2R6W1_HUMAN	cDNA, FLJ93143, highly similar to Homo sapiens complement component 7 (C7), mRNA OS=Homo sapiens OX=9606 PE=2 SV=1	-0.774481	0.4487	3951.99	4779.99	3939.14	3929.03	1855.61	2826.05	-828.002	0.826778	-0.0826113
406	tr|A0A5C2G898|A0A5C2G898_HUMAN	IGL c240_light_IGKV3-20_IGKJ2 (Fragment) OS=Homo sapiens OX=9606 PE=2 SV=1	-0.762063	0.45589	7753.28	10803.4	7765.8	6472.88	2940.85	12310.2	-3050.07	0.717674	-0.144073
407	tr|A0A5C2G080|A0A5C2G080_HUMAN	IGL c1940_light_IGKV3-20_IGKJ5 (Fragment) OS=Homo sapiens OX=9606 PE=2 SV=1	-0.755681	0.45962	2688.56	3814.9	2305.02	1154.63	2019.88	4258.62	-1126.34	0.704752	-0.151963
408	tr|A0A5C2G6I4|A0A5C2G6I4_HUMAN	IGL c2033_light_IGKV3-11_IGKJ4 (Fragment) OS=Homo sapiens OX=9606 PE=2 SV=1	0.754718	0.46018	3698.32	2337.7	1488.59	1432.6	5170.46	2401.6	1360.62	1.58203	0.199215
409	tr|A0A5C2GMC1|A0A5C2GMC1_HUMAN	IG c1308_light_IGLV6-57_IGLJ2 (Fragment) OS=Homo sapiens OX=9606 PE=2 SV=1	0.753008	0.46118	22015.6	17930.9	18608.2	14891.1	13423.6	10680.5	4084.79	1.22781	0.0891305
410	tr|A0A7S5C336|A0A7S5C336_HUMAN	IGH c2465_heavy_IGHV3-7_IGHD1-26_IGHJ6 (Fragment) OS=Homo sapiens OX=9606 PE=2 SV=1	0.750436	0.46269	1618.31	1276.19	1398.97	1205.96	1247.46	722.677	342.122	1.26808	0.103147
411	tr|A0A5C2FY35|A0A5C2FY35_HUMAN	IGL c1802_light_IGKV1D-39_IGKJ1 (Fragment) OS=Homo sapiens OX=9606 PE=2 SV=1	-0.747375	0.46449	4086.24	4992.14	3528.46	5465.12	3228.49	2066.13	-905.897	0.818535	-0.0869626
412	tr|A0A7S5C339|A0A7S5C339_HUMAN	IGH c3007_heavy_IGHV3-48_IGHD3-22_IGHJ6 (Fragment) OS=Homo sapiens OX=9606 PE=2 SV=1	0.744869	0.46597	6813.99	5155.26	4618.69	4566.1	5850.41	3919.52	1658.73	1.32176	0.121151
413	tr|A0A5C2FXZ9|A0A5C2FXZ9_HUMAN	IGL c505_light_IGKV3-20_IGKJ5 (Fragment) OS=Homo sapiens OX=9606 PE=2 SV=1	0.738365	0.46981	5467.32	4136.18	5771.78	2364.5	4115.18	3945.53	1331.14	1.32183	0.121176
414	sp|P80108|PHLD_HUMAN	Phosphatidylinositol-glycan-specific phospholipase D OS=Homo sapiens OX=9606 GN=GPLD1 PE=1 SV=3	0.734558	0.47207	35790.8	32512.7	36792.4	30523.3	10006.8	9950.73	3278.07	1.10082	0.041718
415	tr|A0A5C2GD32|A0A5C2GD32_HUMAN	IG c1121_heavy_IGHV1-18_IGHD3-22_IGHJ4 (Fragment) OS=Homo sapiens OX=9606 PE=2 SV=1	0.732001	0.47359	3637.08	2815.81	2659.12	2015.54	2666.36	2340.56	821.268	1.29166	0.111149
416	tr|A0A5C2GJK5|A0A5C2GJK5_HUMAN	IG c281_light_IGKV3-15_IGKJ4 (Fragment) OS=Homo sapiens OX=9606 PE=2 SV=1	0.721913	0.47962	3271.52	2728.94	3092.75	2383.12	1706.95	1653.86	542.586	1.19883	0.0787564
417	tr|A0A1B1CYC5|A0A1B1CYC5_HUMAN	Vitamin D binding protein (Fragment) OS=Homo sapiens OX=9606 GN=Gc PE=4 SV=1	0.718636	0.48159	53950.4	45991.5	53767.1	35963.7	24477.8	25047.4	7958.84	1.17305	0.0693165
418	tr|A0A5C2FYG7|A0A5C2FYG7_HUMAN	IGL c1216_light_IGKV3-20_IGKJ2 (Fragment) OS=Homo sapiens OX=9606 PE=2 SV=1	-0.709642	0.48702	1579.37	1918.33	1620.16	2357.06	759.461	1305.62	-338.955	0.823307	-0.0844383
419	tr|A2J422|A2J422_HUMAN	Anti-HER3 scFv (Fragment) OS=Homo sapiens OX=9606 PE=2 SV=1	0.704087	0.49039	3320.31	2252.66	1755.57	887.806	3765.56	2968.81	1067.65	1.47395	0.168482
420	tr|B2RA39|B2RA39_HUMAN	cDNA, FLJ94686, highly similar to Homo sapiens complement factor H-related 5 (CFHL5), mRNA OS=Homo sapiens OX=9606 PE=2 SV=1	0.701672	0.49186	4585.71	3977.35	4066.7	3842.97	1911.56	1965.45	608.356	1.15296	0.0618124
421	tr|A0A5C2FZ75|A0A5C2FZ75_HUMAN	IGL c2328_light_IGLV2-11_IGLJ3 (Fragment) OS=Homo sapiens OX=9606 PE=2 SV=1	0.695946	0.49535	3293.1	2269.37	1725.96	1284.12	3496.65	3067.77	1023.72	1.4511	0.161698
422	tr|V9GYM3|V9GYM3_HUMAN	Apolipoprotein A-II OS=Homo sapiens OX=9606 GN=APOA2 PE=1 SV=1	-0.690685	0.49857	2.36097e+06	2.58502e+06	2.36604e+06	2.7333e+06	818461	618359	-224047	0.913329	-0.0393729
423	tr|A0A5C2G5E2|A0A5C2G5E2_HUMAN	IGL c3760_light_IGLV3-25_IGLJ2 (Fragment) OS=Homo sapiens OX=9606 PE=2 SV=1	0.687766	0.50037	12004	9341.77	11408.6	7067.91	7289.44	9833.46	2662.22	1.28498	0.108897
424	tr|A0A5C2GRX7|A0A5C2GRX7_HUMAN	IG c47_light_IGLV1-40_IGLJ1 (Fragment) OS=Homo sapiens OX=9606 PE=2 SV=1	0.685789	0.50158	2560.58	1661.71	615.871	505.702	3551.54	2136.81	898.866	1.54093	0.187782
425	tr|A0A5C2FT54|A0A5C2FT54_HUMAN	IGL c118_light_IGKV3-20_IGKJ1 (Fragment) OS=Homo sapiens OX=9606 PE=2 SV=1	0.671281	0.51057	6717.01	4692.09	3355.57	2177.43	8200.16	4873.46	2024.92	1.43156	0.15581
426	tr|A0A5C2GW41|A0A5C2GW41_HUMAN	IG c807_heavy_IGHV3-13_IGHD5-24_IGHJ6 (Fragment) OS=Homo sapiens OX=9606 PE=2 SV=1	0.67003	0.51134	6471.58	4588.04	3496.58	3025.41	7091.59	5360.37	1883.54	1.41053	0.149383
427	tr|B7ZA94|B7ZA94_HUMAN	Complement component 8 subunit beta OS=Homo sapiens OX=9606 PE=2 SV=1	0.669264	0.51182	94521.1	85874.8	79512.5	88789.2	33551.6	23309.4	8646.31	1.10069	0.0416631
428	tr|S5FLF7|S5FLF7_HUMAN	Lipoprotein B (Fragment) OS=Homo sapiens OX=9606 GN=APOB PE=4 SV=1	0.666268	0.51369	1840.84	1099.59	317.653	648.759	3302.24	1213.48	741.245	1.67411	0.223784
429	tr|A0A5C2G010|A0A5C2G010_HUMAN	IGL c877_light_IGKV3-20_IGKJ2 (Fragment) OS=Homo sapiens OX=9606 PE=2 SV=1	0.659948	0.51764	5517.7	4391.06	5635.41	4366.58	4410.16	3113.61	1126.64	1.25658	0.0991888
430	tr|V9HWJ7|V9HWJ7_HUMAN	Epididymis secretory protein Li 37 OS=Homo sapiens OX=9606 GN=HEL-S-37 PE=1 SV=1	0.659649	0.51783	4411.02	3912.77	4946.41	3711.01	1917.46	1424.22	498.245	1.12734	0.0520542
431	tr|A0A0K0K1J1|A0A0K0K1J1_HUMAN	Epididymis secretory protein Li 2 OS=Homo sapiens OX=9606 GN=HEL-S-2 PE=2 SV=1	0.658753	0.51839	5269.73	4113.94	4359.64	2628.27	4501.01	3244.13	1155.8	1.28095	0.107531
432	tr|A0A2S0BDD1|A0A2S0BDD1_HUMAN	Antithrombin-III OS=Homo sapiens OX=9606 GN=ATIII-R2 PE=2 SV=1	0.649655	0.52412	763779	692659	897616	692168	225420	262734	71119.6	1.10268	0.042448
434	sp|P0C0L4|CO4A_HUMAN	Complement C4-A OS=Homo sapiens OX=9606 GN=C4A PE=1 SV=2	0.644224	0.52755	91557.6	78141.4	77377.9	68215.5	51348.9	41234.2	13416.2	1.17169	0.0688133
435	sp|Q9BRR0|ZKSC3_HUMAN	Zinc finger protein with KRAB and SCAN domains 3 OS=Homo sapiens OX=9606 GN=ZKSCAN3 PE=1 SV=2	0.64416	0.5276	7633.49	6267.01	5286.35	6264.08	5967.35	3064.52	1366.48	1.21804	0.0856626
436	tr|A0A7S5C078|A0A7S5C078_HUMAN	IGH c724_heavy_IGHV1-69_IGHD3-22_IGHJ4 (Fragment) OS=Homo sapiens OX=9606 PE=2 SV=1	-0.640658	0.52982	2533.57	3057.46	2831.2	3061.97	1517.84	2093.61	-523.894	0.828651	-0.0816285
437	tr|A0A5C2G2F8|A0A5C2G2F8_HUMAN	IGL c3478_light_IGLV2-11_IGLJ3 (Fragment) OS=Homo sapiens OX=9606 PE=2 SV=1	0.640416	0.52997	15802.1	13126.9	12807.3	10109.8	7728.7	10712.6	2675.16	1.20379	0.0805516
438	sp|P03951|FA11_HUMAN	Coagulation factor XI OS=Homo sapiens OX=9606 GN=F11 PE=1 SV=1	-0.634676	0.53362	5995.95	6910.42	6560.9	6530.05	2958.96	3464.81	-914.472	0.867668	-0.0616465
439	tr|A0A5C2GCU1|A0A5C2GCU1_HUMAN	IGL c4153_light_IGKV3-20_IGKJ4 (Fragment) OS=Homo sapiens OX=9606 PE=2 SV=1	-0.634679	0.53362	56699.8	75104.7	28651.8	60934.3	65645.9	64030.5	-18404.9	0.754943	-0.122086
440	tr|A0A024RAG6|A0A024RAG6_HUMAN	Complement C1q subcomponent subunit A OS=Homo sapiens OX=9606 GN=ADIC PE=4 SV=1	0.624765	0.53996	34284.3	30957.3	30325	33923.7	13108.2	10571.2	3326.98	1.10747	0.0443319
441	tr|D3DNU8|D3DNU8_HUMAN	Kininogen 1, isoform CRA_a OS=Homo sapiens OX=9606 GN=KNG1 PE=4 SV=1	-0.619688	0.54323	32315.4	36858.3	28463.5	33463	14904.3	17756.4	-4542.9	0.876747	-0.0571258
442	tr|A0A5C2FVG1|A0A5C2FVG1_HUMAN	IGL c889_light_IGKV2D-28_IGKJ2 (Fragment) OS=Homo sapiens OX=9606 PE=2 SV=1	-0.619574	0.5433	3667.02	4803.68	3734.57	3395.22	2579.47	5196.43	-1136.65	0.763378	-0.11726
443	tr|A0A5C2GRQ1|A0A5C2GRQ1_HUMAN	IG c559_heavy_IGHV3-53_IGHD3-9_IGHJ2 (Fragment) OS=Homo sapiens OX=9606 PE=2 SV=1	0.618447	0.54403	20512.7	17235.6	21036.8	13555.8	11178.2	12483.8	3277.17	1.19014	0.075598
444	tr|A0A384N669|A0A384N669_HUMAN	Lumican OS=Homo sapiens OX=9606 PE=2 SV=1	-0.617673	0.54453	91488.5	101565	86216.3	109162	46324	22703.2	-10076.5	0.900788	-0.0453776
445	tr|E7END6|E7END6_HUMAN	Vitamin K-dependent protein C OS=Homo sapiens OX=9606 GN=PROC PE=1 SV=1	-0.61426	0.54673	14292.6	15452.5	14183.4	13360.9	3795.4	4609.61	-1159.86	0.924941	-0.0338862
446	tr|A0A5C2GV81|A0A5C2GV81_HUMAN	IG c1689_heavy_IGHV3-23_IGHD5-18_IGHJ4 (Fragment) OS=Homo sapiens OX=9606 PE=2 SV=1	0.613617	0.54715	657.331	554.784	484.63	484.561	453.711	270.991	102.547	1.18484	0.0736605
447	tr|A6XND1|A6XND1_HUMAN	Insulin-like growth factor-binding protein 3 OS=Homo sapiens OX=9606 PE=2 SV=1	-0.612043	0.54816	5709.94	6421.59	4437.18	7463.16	2787.02	2398.4	-711.651	0.889178	-0.0510111
448	tr|A0A5C2GD14|A0A5C2GD14_HUMAN	IG c725_heavy_IGHV1-18_IGHD6-6_IGHJ4 (Fragment) OS=Homo sapiens OX=9606 PE=2 SV=1	0.610912	0.5489	9840.87	8327.03	9883.92	7062.44	5828.83	5237.28	1513.83	1.1818	0.0725431
449	tr|A0A5C2GRX2|A0A5C2GRX2_HUMAN	IG c1230_heavy_IGHV4-39_IGHD2-2_IGHJ2 (Fragment) OS=Homo sapiens OX=9606 PE=2 SV=1	0.588734	0.56336	7841.95	6793.79	6922.49	6949.73	4653.69	3168.53	1048.15	1.15428	0.0623115
450	tr|A0A7S5EYL7|A0A7S5EYL7_HUMAN	IGH c4094_heavy_IGHV3-21_IGHD5-18_IGHJ4 (Fragment) OS=Homo sapiens OX=9606 PE=2 SV=1	0.588508	0.5635	1011.61	818.647	685.836	613.25	831.755	619.11	192.965	1.23571	0.0919174
451	tr|B2R888|B2R888_HUMAN	Monocyte differentiation antigen CD14 OS=Homo sapiens OX=9606 PE=2 SV=1	-0.585735	0.56533	18923	22467	15291.2	15494.4	6782.6	17890.6	-3543.95	0.842259	-0.0745541
452	tr|Q8TAY0|Q8TAY0_HUMAN	Insulin-like growth factor binding protein, acid labile subunit OS=Homo sapiens OX=9606 GN=IGFALS PE=2 SV=1	0.584795	0.56594	55126	46550.7	28772.8	39150.4	42478.5	18597.9	8575.39	1.18422	0.073431
453	tr|A0A140VK00|A0A140VK00_HUMAN	Testicular tissue protein Li 227 OS=Homo sapiens OX=9606 PE=2 SV=1	-0.583736	0.56664	333104	357984	359161	285163	75007.6	111984	-24880.1	0.930499	-0.0312839
454	tr|B7Z1F8|B7Z1F8_HUMAN	cDNA FLJ53025, highly similar to Complement C4-B OS=Homo sapiens OX=9606 PE=2 SV=1	0.583167	0.56702	1322.19	1143.21	1136.67	1175.81	772.952	586.917	178.979	1.15656	0.0631674
455	tr|A0A5C2GW70|A0A5C2GW70_HUMAN	IG c689_light_IGKV3-20_IGKJ1 (Fragment) OS=Homo sapiens OX=9606 PE=2 SV=1	0.579374	0.56952	12323.3	9078.05	8378.27	5161.94	8596.91	15486.9	3245.28	1.35749	0.132735
456	tr|A0N7I9|A0N7I9_HUMAN	F5-20 (Fragment) OS=Homo sapiens OX=9606 GN=F5-20 PE=2 SV=1	0.575393	0.57215	4950.59	3899.91	5104.9	2321.3	3657.82	4468.08	1050.68	1.26941	0.103602
457	tr|A5YAK2|A5YAK2_HUMAN	Apolipoprotein C-IV OS=Homo sapiens OX=9606 GN=APOC4 PE=2 SV=1	-0.57482	0.57253	7363.46	8340.49	6828.88	8828.57	4203.45	3349.86	-977.034	0.882856	-0.0541099
458	tr|A0A5C2FUQ0|A0A5C2FUQ0_HUMAN	IGL c748_light_IGKV4-1_IGKJ1 (Fragment) OS=Homo sapiens OX=9606 PE=2 SV=1	0.573645	0.57331	981.165	770.919	613.252	611.559	865.742	770.563	210.245	1.27272	0.104733
459	tr|Q8IZZ5|Q8IZZ5_HUMAN	Coagulation factor XII-Mie OS=Homo sapiens OX=9606 PE=2 SV=1	0.570119	0.57564	119406	111881	105109	107911	37404	18520.3	7524.84	1.06726	0.0282692
460	tr|A0A5C2G7V5|A0A5C2G7V5_HUMAN	IGL c594_light_IGKV3-20_IGKJ1 (Fragment) OS=Homo sapiens OX=9606 PE=2 SV=1	-0.569238	0.57623	626.694	729.308	518.524	721.53	455.253	343.071	-102.613	0.8593	-0.0658551
461	tr|A0A2Y9CYD6|A0A2Y9CYD6_HUMAN	Ig heavy chain variable region (Fragment) OS=Homo sapiens OX=9606 GN=IgH PE=2 SV=1	-0.568756	0.57655	1930.27	2307.36	1891.87	1595.55	1275.07	1664.32	-377.089	0.836571	-0.077497
462	tr|J3KSE5|J3KSE5_HUMAN	Coiled-coil domain-containing protein 103 (Fragment) OS=Homo sapiens OX=9606 GN=CCDC103 PE=1 SV=1	0.568332	0.57683	1793.28	1376.93	1022.45	1256.58	1973.2	1213.84	416.355	1.30238	0.114738
463	tr|C9JEU5|C9JEU5_HUMAN	Fibrinogen gamma chain OS=Homo sapiens OX=9606 GN=FGG PE=1 SV=1	0.568183	0.57693	11188.2	10150.2	9689.11	10878.7	4726.28	3322.34	1038.01	1.10227	0.0422861
464	tr|D9IWP9|D9IWP9_HUMAN	Apolipoprotein H (Fragment) OS=Homo sapiens OX=9606 PE=2 SV=1	-0.558741	0.58322	717932	787929	655522	756314	250120	307219	-69997.5	0.911163	-0.0404041
465	sp|P0DJI9|SAA2_HUMAN	Serum amyloid A-2 protein OS=Homo sapiens OX=9606 GN=SAA2 PE=1 SV=1	-0.551806	0.58787	2424.87	2966.49	2084.3	2288.61	1492.19	2721.64	-541.612	0.817423	-0.0875531
466	tr|A0A7S5EXF6|A0A7S5EXF6_HUMAN	IGH c3227_heavy_IGHV1-18_IGHD3-10_IGHJ4 (Fragment) OS=Homo sapiens OX=9606 PE=2 SV=1	-0.548144	0.59033	4610.37	5380.89	3369.08	5037.37	3089.47	3196.02	-770.516	0.856805	-0.0671179
467	tr|A0A5C2GBU1|A0A5C2GBU1_HUMAN	IGH + IGL c108_light_IGKV2-28_IGKJ2 (Fragment) OS=Homo sapiens OX=9606 PE=2 SV=1	0.543418	0.59351	6110.94	5066.49	5337.47	3813.22	4565.27	4012.37	1044.45	1.20615	0.0814008
468	sp|Q06033|ITIH3_HUMAN	Inter-alpha-trypsin inhibitor heavy chain H3 OS=Homo sapiens OX=9606 GN=ITIH3 PE=1 SV=2	0.537203	0.59771	110668	99552.9	136345	80601.7	43302	49053.8	11115.5	1.11165	0.0459697
469	tr|A0A182DWH7|A0A182DWH7_HUMAN	Selenoprotein P (Fragment) OS=Homo sapiens OX=9606 GN=SELENOP PE=1 SV=1	0.533626	0.60013	13266.1	12043.3	12254.5	13445.8	5099.42	5148.2	1222.78	1.10153	0.0419971
470	tr|V9HWE1|V9HWE1_HUMAN	Vimentin OS=Homo sapiens OX=9606 GN=HEL113 PE=2 SV=1	0.520778	0.60887	1041.96	876.645	839.42	751.083	785.008	625.656	165.316	1.18858	0.0750276
471	tr|Q8WVW5|Q8WVW5_HUMAN	Uncharacterized protein (Fragment) OS=Homo sapiens OX=9606 PE=2 SV=1	0.517732	0.61095	13979.7	12597.2	10890.9	12334.5	7214.57	4388.11	1382.51	1.10975	0.0452241
472	tr|A0A5C2G5G7|A0A5C2G5G7_HUMAN	IGH c246_heavy__IGHV2-26_IGHD3-10_IGHJ4 (Fragment) OS=Homo sapiens OX=9606 PE=2 SV=1	-0.515984	0.61215	6004.45	7050.22	6706.28	4723.98	3400.59	5432.59	-1045.77	0.851669	-0.0697294
473	tr|A0A5C2G6Y8|A0A5C2G6Y8_HUMAN	IGL c148_light_IGLV2-18_IGLJ3 (Fragment) OS=Homo sapiens OX=9606 PE=2 SV=1	-0.514623	0.61308	5786.33	6905.84	4928.22	5447.59	4399.51	5288.43	-1119.51	0.83789	-0.0768129
474	tr|A0A7S5EUV5|A0A7S5EUV5_HUMAN	IGH c242_heavy_IGHV3-30_IGHD3-9_IGHJ5 (Fragment) OS=Homo sapiens OX=9606 PE=2 SV=1	-0.514331	0.61328	923.01	1030.28	918.978	997.04	247.392	611.365	-107.268	0.895884	-0.0477482
475	tr|A0A5C2GDE3|A0A5C2GDE3_HUMAN	IGH + IGL c603_light_IGKV3-11_IGKJ5 (Fragment) OS=Homo sapiens OX=9606 PE=2 SV=1	0.500237	0.62297	6285.02	5410.45	5452.61	3455.31	2877.95	4720.54	874.572	1.16164	0.0650734
476	tr|A0A5C2GSM5|A0A5C2GSM5_HUMAN	IG c1149_light_IGLV1-40_IGLJ3 (Fragment) OS=Homo sapiens OX=9606 PE=2 SV=1	-0.497718	0.62471	2884.11	3354.53	2828.45	2856.15	1109.23	2775.38	-470.419	0.859766	-0.0656197
477	tr|A0A140VKF3|A0A140VKF3_HUMAN	Testis tissue sperm-binding protein Li 70n OS=Homo sapiens OX=9606 PE=2 SV=1	0.497608	0.62478	100377	96408.7	97989.2	100610	20092.4	15236.5	3967.96	1.04116	0.0175165
478	tr|A0A5C2G5C9|A0A5C2G5C9_HUMAN	IGH c120_heavy__IGHV1-2_IGHD3-22_IGHJ4 (Fragment) OS=Homo sapiens OX=9606 PE=2 SV=1	-0.494689	0.6268	7929.95	11670	4558.83	1737.68	11504.4	20958	-3740.02	0.679518	-0.167799
479	tr|A0A2Z4LCH4|A0A2Z4LCH4_HUMAN	Corticosteroid-binding globulin OS=Homo sapiens OX=9606 PE=2 SV=1	0.488502	0.63109	121479	116250	121670	115910	31200.2	13141.4	5229.83	1.04499	0.0191113
480	tr|H0YAC1|H0YAC1_HUMAN	Plasma kallikrein (Fragment) OS=Homo sapiens OX=9606 GN=KLKB1 PE=1 SV=1	0.486085	0.63277	100891	96436.5	100290	100548	20062.9	20912.2	4454.62	1.04619	0.0196115
481	tr|A0A5C2FU63|A0A5C2FU63_HUMAN	IGL c282_light_IGLV1-47_IGLJ2 (Fragment) OS=Homo sapiens OX=9606 PE=2 SV=1	-0.485718	0.63303	1120.36	1289.39	973.652	1106.49	722.658	829.945	-169.03	0.868907	-0.0610269
482	sp|O95445|APOM_HUMAN	Apolipoprotein M OS=Homo sapiens OX=9606 GN=APOM PE=1 SV=2	0.48418	0.6341	281652	261491	269533	256723	106190	77859.4	20161	1.0771	0.032256
483	tr|A0A5C2GJG7|A0A5C2GJG7_HUMAN	IGH + IGL c147_light_IGKV2-24_IGKJ1 (Fragment) OS=Homo sapiens OX=9606 PE=2 SV=1	-0.477998	0.63841	2159.27	2557.1	1708.99	2213.37	1556.89	2122.1	-397.836	0.844419	-0.0734419
484	sp|P35908|K22E_HUMAN	Keratin, type II cytoskeletal 2 epidermal OS=Homo sapiens OX=9606 GN=KRT2 PE=1 SV=2	-0.477065	0.63906	1042.67	1260.65	1014.29	676.481	828.629	1183.65	-217.975	0.827093	-0.0824458
485	tr|A0A5C2FW64|A0A5C2FW64_HUMAN	IGL c1328_light_IGLV2-23_IGLJ1 (Fragment) OS=Homo sapiens OX=9606 PE=2 SV=1	0.474683	0.64072	1934.08	1640.92	1732.88	1154.92	1411.78	1349.44	293.157	1.17865	0.0713864
486	tr|Q6IN99|Q6IN99_HUMAN	IGL@ protein OS=Homo sapiens OX=9606 GN=IGL@ PE=2 SV=1	0.467247	0.64593	5194.15	4130.75	3551	3236.29	6373.51	3342.8	1063.4	1.25743	0.0994851
487	sp|O43866|CD5L_HUMAN	CD5 antigen-like OS=Homo sapiens OX=9606 GN=CD5L PE=1 SV=1	0.465632	0.64706	120030	110325	104087	111594	38882.7	53221.9	9705.31	1.08797	0.0366171
488	tr|A0A7S5C6S8|A0A7S5C6S8_HUMAN	IGH c3220_heavy_IGHV3-49_IGHD2-15_IGHJ3 (Fragment) OS=Homo sapiens OX=9606 PE=2 SV=1	0.463435	0.64861	989.19	829.288	802.914	518.775	879.513	645.722	159.902	1.19282	0.0765743
489	tr|Q6N092|Q6N092_HUMAN	Uncharacterized protein DKFZp686K18196 (Fragment) OS=Homo sapiens OX=9606 GN=DKFZp686K18196 PE=2 SV=1	0.45704	0.65311	35335.6	26340	13200.8	16897.4	54331.7	30365.7	8995.69	1.34152	0.127598
490	tr|A0A5C2GVT0|A0A5C2GVT0_HUMAN	IG c1601_heavy_IGHV3-74_IGHD1-7_IGHJ2 (Fragment) OS=Homo sapiens OX=9606 PE=2 SV=1	-0.444062	0.66229	1175.57	1367.22	1166.38	726.877	621.185	1215.24	-191.652	0.859824	-0.0655906
491	sp|P09871|C1S_HUMAN	Complement C1s subcomponent OS=Homo sapiens OX=9606 GN=C1S PE=1 SV=1	0.443205	0.6629	121186	114248	115736	119122	43179.4	24202.8	6937.59	1.06072	0.0256024
492	sp|A0A0B4J1Y9|HV372_HUMAN	Immunoglobulin heavy variable 3-72 OS=Homo sapiens OX=9606 GN=IGHV3-72 PE=3 SV=1	0.442287	0.66355	24914.7	21247.9	22242.4	13676.4	17374.2	19632.7	3666.74	1.17257	0.0691385
493	tr|A0A7S5C3D4|A0A7S5C3D4_HUMAN	IGH c3463_heavy_IGHV1-69_IGHD3-22_IGHJ4 (Fragment) OS=Homo sapiens OX=9606 PE=2 SV=1	-0.42245	0.6777	13936.7	16408.4	13478.6	11967.2	11497.1	14496	-2471.67	0.849366	-0.0709052
494	tr|A0A0S2Z3D5|A0A0S2Z3D5_HUMAN	Apolipoprotein E isoform 1 (Fragment) OS=Homo sapiens OX=9606 GN=APOE PE=2 SV=1	-0.419097	0.6801	364809	379838	382499	394752	88507.5	70888.2	-15028.4	0.960435	-0.0175322
495	tr|A0A5C2GP40|A0A5C2GP40_HUMAN	IG c444_heavy_IGHV3-48_IGHD6-6_IGHJ4 (Fragment) OS=Homo sapiens OX=9606 PE=2 SV=1	0.414078	0.68371	8640.9	7721.97	6627.16	9127.56	4688.65	5221.76	918.938	1.119	0.0488313
496	sp|P0DJI8|SAA1_HUMAN	Serum amyloid A-1 protein OS=Homo sapiens OX=9606 GN=SAA1 PE=1 SV=1	0.412437	0.68489	33097.1	24679	18229.6	3357.8	46035.4	45240.1	8418.09	1.3411	0.127462
497	tr|Q9UPY7|Q9UPY7_HUMAN	Fc-gamma receptor IIIb (CD 16) OS=Homo sapiens OX=9606 GN=Fc-gamma receptor IIIB PE=2 SV=1	0.403829	0.6911	2826.81	2460.53	2856.38	1820.34	1710.51	2302.35	366.277	1.14886	0.0602674
498	tr|A0A7S5BZA1|A0A7S5BZA1_HUMAN	IGH c1041_heavy_IGHV3-48_IGHD3-22_IGHJ4 (Fragment) OS=Homo sapiens OX=9606 PE=2 SV=1	-0.399757	0.69404	912.702	1047.48	651.451	798.315	636.76	855.14	-134.78	0.87133	-0.0598174
499	sp|P01714|LV319_HUMAN	Immunoglobulin lambda variable 3-19 OS=Homo sapiens OX=9606 GN=IGLV3-19 PE=1 SV=2	0.397912	0.69537	1742.04	1532.94	1218.76	1287.74	1412.23	875.734	209.095	1.1364	0.0555317
500	sp|P02790|HEMO_HUMAN	Hemopexin OS=Homo sapiens OX=9606 GN=HPX PE=1 SV=2	0.392529	0.69928	6.77637e+06	6.53092e+06	6.64261e+06	6.47516e+06	1.58826e+06	1.17787e+06	245447	1.03758	0.0160226
501	tr|A0A5C2GCB3|A0A5C2GCB3_HUMAN	IGL c223_light_IGKV1-27_IGKJ4 (Fragment) OS=Homo sapiens OX=9606 PE=2 SV=1	0.391971	0.69968	4357.06	3928.22	4905.46	2629.53	2095.07	2753.34	428.849	1.10917	0.0449987
502	tr|A0A7S5EVA2|A0A7S5EVA2_HUMAN	IGH c2025_heavy_IGHV3-15_IGHD3-22_IGHJ4 (Fragment) OS=Homo sapiens OX=9606 PE=2 SV=1	-0.388352	0.70231	8043.91	9223.05	7763.88	3794.65	2466.43	9279.34	-1179.14	0.872153	-0.0594074
503	tr|B7Z549|B7Z549_HUMAN	cDNA FLJ56821, highly similar to Inter-alpha-trypsin inhibitor heavy chain H1 OS=Homo sapiens OX=9606 PE=2 SV=1	-0.388337	0.70232	361447	381568	309473	365238	127663	102704	-20120.9	0.947268	-0.0235272
504	tr|A0A5C2G084|A0A5C2G084_HUMAN	IGL c2668_light_IGLV2-14_IGLJ2 (Fragment) OS=Homo sapiens OX=9606 PE=2 SV=1	-0.382122	0.70685	23695	25578.9	22498.2	29447.9	9693.88	12210.4	-1883.93	0.926348	-0.0332256
505	sp|P07360|CO8G_HUMAN	Complement component C8 gamma chain OS=Homo sapiens OX=9606 GN=C8G PE=1 SV=3	-0.378201	0.7097	32783.8	34093.8	30988.8	36075.6	7123.94	8320.48	-1310.02	0.961576	-0.0170164
506	tr|A0A7S5BYY5|A0A7S5BYY5_HUMAN	IGH c245_heavy_IGHV3-74_IGHD3-22_IGHJ4 (Fragment) OS=Homo sapiens OX=9606 PE=2 SV=1	-0.376504	0.71094	747.093	844.506	601.921	640.047	465.133	673.099	-97.4127	0.884651	-0.0532279
507	tr|A0A7S5C3L2|A0A7S5C3L2_HUMAN	IGH c3262_heavy_IGHV5-51_IGHD6-13_IGHJ6 (Fragment) OS=Homo sapiens OX=9606 PE=2 SV=1	0.37619	0.71117	2837.45	2580.84	2466.4	2675.11	1905.45	1011.09	256.611	1.09943	0.0411673
508	tr|D6R934|D6R934_HUMAN	Complement C1q subcomponent subunit B OS=Homo sapiens OX=9606 GN=C1QB PE=1 SV=1	-0.371966	0.71426	129946	136716	124317	143622	41576.4	39798.8	-6769.93	0.950482	-0.0220561
509	sp|P01833|PIGR_HUMAN	Polymeric immunoglobulin receptor OS=Homo sapiens OX=9606 GN=PIGR PE=1 SV=4	-0.370615	0.71525	11151.6	13505	8405.08	8345.54	8608.41	18141.5	-2353.39	0.82574	-0.0831567
510	tr|A0A3G1HEF1|A0A3G1HEF1_HUMAN	Mutant serpin family A member 7 OS=Homo sapiens OX=9606 PE=2 SV=1	0.367805	0.71731	89572	86506.8	90932.4	88281.4	17382.6	19807.8	3065.17	1.03543	0.0151219
511	tr|A0A5C2G485|A0A5C2G485_HUMAN	IGL c2277_light_IGLV2-14_IGLJ1 (Fragment) OS=Homo sapiens OX=9606 PE=2 SV=1	-0.361749	0.72175	3336.06	3656.29	3001.64	3662.28	1908.58	2047.83	-320.23	0.912417	-0.0398068
512	tr|A0A024RAA7|A0A024RAA7_HUMAN	Adiponectin B OS=Homo sapiens OX=9606 GN=ADIB PE=4 SV=1	0.359214	0.72361	128702	122069	119029	131720	45680.7	36366.8	6632.6	1.05433	0.0229786
513	sp|P02768|ALBU_HUMAN	Albumin OS=Homo sapiens OX=9606 GN=ALB PE=1 SV=2	0.357937	0.72455	295674	264006	218679	149643	171537	221020	31667.8	1.11995	0.049199
514	tr|A0A5C2FYZ3|A0A5C2FYZ3_HUMAN	IGL c875_light_IGKV3-20_IGKJ1 (Fragment) OS=Homo sapiens OX=9606 PE=2 SV=1	-0.352612	0.72847	4387.93	4863.71	4181.97	3833.11	1933	3803.99	-475.789	0.902176	-0.0447088
515	tr|A0A5C2GL81|A0A5C2GL81_HUMAN	IG c325_heavy_IGHV5-51_IGHD5-24_IGHJ4 (Fragment) OS=Homo sapiens OX=9606 PE=2 SV=1	0.346716	0.73283	6104.8	5466.47	4525.86	5219.11	5074.52	2853.85	638.326	1.11677	0.0479641
516	tr|S6BGD4|S6BGD4_HUMAN	IgG H chain OS=Homo sapiens OX=9606 PE=2 SV=1	0.326996	0.74744	17476.1	15455.3	13843.8	16362.4	15356.7	12087	2020.84	1.13075	0.0533681
517	tr|A0A7T0PWU2|A0A7T0PWU2_HUMAN	Immunglobulin heavy chain variable region (Fragment) OS=Homo sapiens OX=9606 PE=2 SV=1	0.324393	0.74938	4079.25	3637.61	3097.48	2277.66	3056.91	3031.47	441.633	1.12141	0.0497634
518	tr|A0A7S5C4H2|A0A7S5C4H2_HUMAN	IGH c1750_heavy_IGHV3-49_IGHD3-9_IGHJ6 (Fragment) OS=Homo sapiens OX=9606 PE=2 SV=1	-0.321677	0.7514	1682.56	1905.31	1447.99	1300.21	1123.66	1879.48	-222.75	0.88309	-0.0539949
519	tr|A0A5C2G775|A0A5C2G775_HUMAN	IGL c2293_light_IGKV3-20_IGKJ1 (Fragment) OS=Homo sapiens OX=9606 PE=2 SV=1	-0.313148	0.75777	5695	6207.85	6424.62	5707.84	3286.87	4002.25	-512.852	0.917387	-0.0374476
520	tr|A0A5C2GR31|A0A5C2GR31_HUMAN	IG c349_heavy_IGHV5-51_IGHD3-10_IGHJ6 (Fragment) OS=Homo sapiens OX=9606 PE=2 SV=1	-0.311462	0.75903	758.568	830.319	601.181	842.949	528.175	501.721	-71.7509	0.913586	-0.0392504
521	tr|A0A5C2GET5|A0A5C2GET5_HUMAN	IG c120_heavy_IGHV3-49_IGHD2-2_IGHJ3 (Fragment) OS=Homo sapiens OX=9606 PE=2 SV=1	-0.310165	0.76	6458.19	7230.44	7701.84	4469.92	3298.4	7149.21	-772.247	0.893195	-0.0490538
522	tr|A0A5C2GJ51|A0A5C2GJ51_HUMAN	IG c360_light_IGKV3-20_IGKJ2 (Fragment) OS=Homo sapiens OX=9606 PE=2 SV=1	-0.309716	0.76033	10160.3	11718	8119.16	4708.33	6062.97	14703.5	-1557.69	0.867069	-0.0619465
523	tr|B2R773|B2R773_HUMAN	cDNA, FLJ93312, highly similar to Homo sapiens adipose most abundant gene transcript 1 (APM1), mRNA OS=Homo sapiens OX=9606 PE=2 SV=1	0.304128	0.76452	4760.79	4284.11	5104.79	2664.53	2088.01	4495.14	476.677	1.11127	0.0458182
524	tr|A6XMH4|A6XMH4_HUMAN	Beta-2-microglobulin OS=Homo sapiens OX=9606 PE=2 SV=1	0.300558	0.7672	19885.3	18214.6	17293.1	12049.2	11250.2	13505.3	1670.62	1.09172	0.0381108
525	tr|A0A7S5C378|A0A7S5C378_HUMAN	IGH c3373_heavy_IGHV1-2_IGHD5-24_IGHJ5 (Fragment) OS=Homo sapiens OX=9606 PE=2 SV=1	-0.298499	0.76874	4070.95	4802.62	2409.14	1135.19	3226.95	7047.61	-731.669	0.847652	-0.0717823
526	tr|A0A7T0LP94|A0A7T0LP94_HUMAN	Immunglobulin heavy chain variable region (Fragment) OS=Homo sapiens OX=9606 PE=2 SV=1	-0.294621	0.77165	2030.87	2215.5	2272.29	2369.69	1334.6	1465.01	-184.636	0.916662	-0.0377908
527	tr|Q8N5F4|Q8N5F4_HUMAN	IGL@ protein OS=Homo sapiens OX=9606 GN=IGL@ PE=1 SV=1	0.294603	0.77167	12317.4	10832.1	5922.68	8090.88	13512.1	8461.97	1485.29	1.13712	0.0558058
528	tr|A0A5C2GQ33|A0A5C2GQ33_HUMAN	IG c1506_heavy_IGHV3-21_IGHD5-5_IGHJ6 (Fragment) OS=Homo sapiens OX=9606 PE=2 SV=1	0.293168	0.77275	1168.9	1089.46	1217.45	1198.68	628.62	582.437	79.4477	1.07292	0.030569
529	tr|A0A7S5C132|A0A7S5C132_HUMAN	IGH c1174_heavy_IGHV6-1_IGHD3-10_IGHJ2 (Fragment) OS=Homo sapiens OX=9606 PE=2 SV=1	-0.287565	0.77696	7310.79	7728.31	6735.36	6983.8	2766.27	3664.49	-417.521	0.945975	-0.0241203
530	tr|A0A7S5BZQ4|A0A7S5BZQ4_HUMAN	IGH c1296_heavy_IGHV3-7_IGHD7-27_IGHJ4 (Fragment) OS=Homo sapiens OX=9606 PE=2 SV=1	-0.286832	0.77752	484.522	523.453	508.584	501.067	259.019	342.245	-38.9313	0.925626	-0.0335644
531	tr|A0A5C2GBE2|A0A5C2GBE2_HUMAN	IGL c3713_light_IGLV7-46_IGLJ2 (Fragment) OS=Homo sapiens OX=9606 PE=2 SV=1	-0.286181	0.77801	1542.05	1747.03	1217.36	1246.44	1441.81	1746.8	-204.977	0.882671	-0.0542011
532	tr|A0A5C2G2K2|A0A5C2G2K2_HUMAN	IGL c3382_light_IGKV1D-12_IGKJ4 (Fragment) OS=Homo sapiens OX=9606 PE=2 SV=1	-0.282361	0.78089	689.672	752.047	471.36	588.091	439.384	543.072	-62.3746	0.91706	-0.0376021
533	tr|A0N5G3|A0N5G3_HUMAN	Rheumatoid factor G9 light chain (Fragment) OS=Homo sapiens OX=9606 GN=V-lambda-3 PE=2 SV=1	-0.280618	0.7822	816.398	877.216	854.272	1054.06	432.205	531.896	-60.8181	0.930669	-0.0312047
534	tr|A0A5C2G678|A0A5C2G678_HUMAN	IGL c1903_light_IGLV3-27_IGLJ3 (Fragment) OS=Homo sapiens OX=9606 PE=2 SV=1	-0.279775	0.78284	1683.52	1882.06	1444.88	870.657	771.194	2107.37	-198.537	0.894511	-0.0484144
535	tr|V9HWI6|V9HWI6_HUMAN	Gc-globulin OS=Homo sapiens OX=9606 GN=HEL-S-51 PE=2 SV=1	-0.274137	0.7871	3618.55	3820.98	3635.58	3397.43	1381.42	1882.7	-202.433	0.947021	-0.0236405
536	tr|B2R950|B2R950_HUMAN	cDNA, FLJ94213, highly similar to Homo sapiens pregnancy-zone protein (PZP), mRNA OS=Homo sapiens OX=9606 PE=2 SV=1	-0.267722	0.79196	593772	626605	597250	614503	337128	191703	-32833.4	0.947601	-0.0233744
537	sp|Q03591|FHR1_HUMAN	Complement factor H-related protein 1 OS=Homo sapiens OX=9606 GN=CFHR1 PE=1 SV=2	0.2616	0.7966	14114.4	13232.7	13997.1	9807.45	7310.95	7756.73	881.779	1.06664	0.0280164
538	tr|Q5FWF9|Q5FWF9_HUMAN	IGL@ protein OS=Homo sapiens OX=9606 GN=IGL@ PE=1 SV=1	0.259351	0.79831	17203.7	13053.6	3318.67	2157.67	40716.1	30046.2	4150.08	1.31792	0.119891
539	tr|A0A5C2G755|A0A5C2G755_HUMAN	IGL c3537_light_IGKV4-1_IGKJ4 (Fragment) OS=Homo sapiens OX=9606 PE=2 SV=1	0.255953	0.80089	1756.54	1642.72	1351.79	1259.27	1010.94	977.421	113.816	1.06929	0.0290935
540	tr|A0A5C2GVN1|A0A5C2GVN1_HUMAN	IG c1367_light_IGLV9-49_IGLJ3 (Fragment) OS=Homo sapiens OX=9606 PE=2 SV=1	-0.255727	0.80106	9216.36	9857.17	8082.79	11416.1	6672.63	4274.29	-640.816	0.93499	-0.0291931
541	tr|V9HWD8|V9HWD8_HUMAN	Epididymis secretory sperm binding protein Li 163pA OS=Homo sapiens OX=9606 GN=HEL-S-163pA PE=2 SV=1	0.25529	0.80139	1.13064e+06	1.10353e+06	1.08368e+06	1.10555e+06	140739	304847	27106.4	1.02456	0.0105388
542	tr|A0A5C2GN30|A0A5C2GN30_HUMAN	IG c862_heavy_IGHV3-9_IGHD2-21_IGHJ3 (Fragment) OS=Homo sapiens OX=9606 PE=2 SV=1	0.253446	0.8028	1235.68	1144.73	1078.15	873.911	911.681	675.748	90.9513	1.07945	0.0332034
543	tr|B0ZBE2|B0ZBE2_HUMAN	Angiotensin 1-10 OS=Homo sapiens OX=9606 GN=AGT PE=2 SV=1	0.252369	0.80361	5017.71	4586.72	3865.22	4544.27	4271.3	3304.56	430.984	1.09396	0.0390028
544	tr|S6AWF0|S6AWF0_HUMAN	IgG H chain OS=Homo sapiens OX=9606 PE=2 SV=1	0.249164	0.80606	7801.3	7452.76	7661.85	7810.71	3214.82	3038.5	348.541	1.04677	0.0198499
[truncated: 57 more rows]

## Sheet: C vs L 
					Control (PCR-)	L (nonsevere)
[truncated: 601 more rows]

## Sheet: C vs S
					Control (PCR-)	S (severe)
[truncated: 601 more rows]

[truncated: 2 more sheets: Ig proteins, Non-Ig proteins]
