# Supplementary material for: Correlates with Vaccine Protective Capacity and COVID-19 Disease Symptoms Identified by Serum Proteomics in Vaccinated Individuals
Source: Molecules. 2022 Sep 13;27(18):5933. doi: 10.3390/molecules27185933 (PMC9500703; doi:10.3390/molecules27185933)
Supplement: Supplementary file 1 [file molecules-27-05933-s001.zip › Data file S3.xlsx]

## Sheet: IgM_NSI
Data file S3. Human autoantibody general survey in PCR- and PCR+ cohorts
ID	S2	S3	S4	S5	L1	L2	L3	A1	A2	A3	A4	C1	C2	C3	C4
Aggrecan	768.5	119	69.5	124.5	43.5	210.5	46	148.5	401	363	61.5	124.5	187	202	71.5
AGTR	793	245	180	107	110	232.5	154	174.5	221.5	212	275	191.5	139.5	239.5	75.5
Alpha-actinine	290	28.5	62	11	30.5	17.5	34	12.5	36.5	21	46.5	29.5	21	65	11
Alpha Fodrin	1359.5	718	510.5	343	320	623.5	535.5	344	1041	722	728	564	549	910.5	195.5
Amyloid	315	22	50	6	16	8.5	35	7.5	11	21.5	23	16.5	7	50.5	7
AQP4	8286.5	4832.5	2798	1943.5	1654	4581	2493.5	3169	5236.5	4799	1812	4291.5	2503	5362	865.5
B2-microglobulin	688	245	274.5	102.5	108.5	166.5	152	96.5	398	224	165	165.5	209	191.5	34.5
B2 glycoprotein 1	2788	1938	1137.5	973.5	788.5	1793	1213.5	965	2380	1990	935.5	1576.5	1173.5	1828	385.5
B-actin	6809.5	6296	3123.5	2414	2161	4452.5	2525.5	2918	7146.5	5672	2226.5	4155.5	3627	5074	1174.5
BPI	2518.5	1584.5	1129	722.5	683	1388.5	859.5	1013	2874	1591	1046	1326	1206.5	1815.5	354.5
Calprotectin	9065.5	6625.5	3804	2436	2325.5	4706	2656	2804.5	7975	5736.5	2926	4036	4077	4919.5	1257.5
Cardolipin	1132.5	457.5	371	283	173.5	311	388	267	442.5	683.5	234	282.5	286	365.5	65
CD4	3709.5	2655.5	1789	880	1034	1903.5	1233	1248	3887	2561.5	1242.5	1862	1573.5	2022.5	473.5
CD8	2945	1835	1319.5	812.5	761	1689.5	1442.5	903.5	3068	1641	1028	1438	1324	1777	389
CENP-A	1776.5	790	608	276.5	275.5	506	372.5	267	486.5	596	80.5	419.5	264	753	89.5
CENP-B	8004	4032	1981	1545.5	1227	2943	1939.5	1682	4344	3152	1649.5	2569	1938.5	3263.5	757.5
Chondroitin Sulfate	428	95.5	69	27.5	30.5	42.5	54.5	23.5	81.5	54.5	53	47.5	35	124	12
COL17A1	236	118.5	103.5	0.001	84	0.001	105.5	17.5	176	0.001	93.5	0.001	108.5	474.5	62
Collagen I	331	47.5	63	24	26	35.5	50.5	21	46	47	37	33.5	26	62	11.5
Collagen II	426	62.5	102.5	20.5	42.5	44	84.5	20.5	78.5	43.5	51.5	37	49.5	71	15
Collagen III	570	73	90.5	16	45	34.5	78	18.5	43.5	48	52	37	26	114.5	7
Collagen IV	662.5	247	181.5	109.5	130.5	199	200.5	118	254.5	227.5	102	171	130	249.5	48.5
Collagen V	557.5	220	209.5	122	166.5	190.5	233	79.5	317.5	256.5	135.5	209	155	234	59.5
Collagen VI	15859.5	1826	2100	1017	733.5	1468.5	1040	1203	2367	1861.5	3323.5	1977.5	1177.5	4321.5	369.5
complement C1q	6612	5610	3440.5	2530	2186.5	5121.5	3001.5	2877.5	7293.5	5518.5	2218.5	4379	3674.5	5251	1274.5
complement C3/C3a	2057	1029	1224.5	117.5	1107.5	280.5	1475.5	506.5	3200.5	276.5	1019.5	252.5	1242.5	722.5	571.5
Core Histone	2830.5	525	750	208.5	755.5	328	467	366	723	439	819.5	419	370	1163.5	170
CRP	39784	25510	17532.5	13108.5	11942.5	24305.5	12294.5	16386.5	32946.5	24191	12960	19128.5	18968.5	21061	6357
dsDNA	2075	770.5	597.5	269.5	321	464	464.5	330	1124	727	383	463	495.5	841.5	156
EBNA1	7649	4941	2847	1525.5	1743.5	3167.5	2224.5	1906	4812.5	4546	1602.5	2889.5	2293	3356	842
Elastin	1534.5	603.5	403.5	255.5	267.5	489.5	365	300	727	552.5	353	436	382.5	623	128
Factor B	7081.5	4226.5	3116	1597.5	1638.5	3630.5	2450.5	2345.5	6722.5	4260	2245.5	3299.5	3222.5	3874.5	893
Factor D	678.5	93	137.5	42.5	59	98.5	100.5	62.5	105.5	140.5	88.5	100	53.5	217	19.5
Factor H	3098.5	2176	1331	918.5	927	1895.5	1547.5	1105	3047.5	2103	1060	1666.5	1339.5	2009.5	489.5
Factor I	3508.5	2585.5	1602	1157	975	2244.5	1430.5	1317	3842.5	2701	1180.5	2047.5	1700.5	2458	631
Factor P	797	182	158.5	99.5	101.5	179	157	134	252	201.5	134.5	142	129	226	56.5
Fibrinogen IV	2395	913.5	708	317.5	415.5	691.5	570.5	463	1255	867.5	506	658	600	911	226
Fibrinogen S	2598.5	1033.5	750	390.5	464	770.5	633	513.5	1476.5	1015.5	559.5	755.5	682.5	938	232.5
Fibronectin	2714	1715.5	1021	661.5	672	1249	919	861	2221	1543	742.5	1155.5	1032.5	1451.5	349.5
GAD65/GAD2	2461	2105.5	1053	785.5	603.5	1373.5	764	877.5	1959	1674.5	680.5	1286.5	1026.5	1588.5	391.5
GBM	1161	442.5	185.5	32.5	101.5	442	155.5	149.5	216	652	218	360.5	308.5	590.5	113
GDF-15	455.5	50	61.5	18	29	46.5	48.5	39.5	36	47	69.5	39.5	16	88	8
GM-CSF	2395.5	1576.5	1003	591.5	596.5	1236.5	843.5	745.5	2164	1293	734	999	970.5	1137	315.5
GP2	4270	2738	1841	1170.5	1160	2686.5	1508.5	1448	4187.5	2968.5	1296	2368	1973.5	2792	620
GP210	1682	720.5	770.5	122.5	606	576.5	720.5	305.5	861.5	611.5	405	472	432	1058	178
Hemocyanin	22705.5	14322.5	10761.5	5723.5	5601.5	11249.5	6698	8226.5	18386	17415	7003.5	11733	10644.5	12963	3182.5
Heparan Sulphate	535	60	82.5	17.5	35	30	59.5	21	49	54	52	46	20	84	6.5
Heparin	981.5	301	146	84	91	146.5	132	92	241.5	195	251	208	111	226.5	47
Histone H1	8496	3855.5	10570	783.5	3527.5	2670.5	9509	0.001	10734.5	4270	4159.5	2958.5	1931.5	4196	1850
Histone H2A	1151	178.5	341.5	100.5	212	122	211	70	279.5	139	261	130	110	664.5	78
Histone H2B	1614.5	421.5	588	256.5	357.5	298	415.5	187.5	545.5	342	396	308.5	310	847	188
Histone H3	875.5	179	334	85.5	176.5	141	206	69.5	260.5	186.5	192.5	143	128	242.5	62
Histone H4	516	46.5	92	25	35.5	50.5	61	28	56.5	67	48	51	31	79	7.5
IA2	2595	1201	1032.5	501.5	552.5	1001	850.5	702.5	2039.5	1404.5	750	985	978	1345.5	324
IFN-A1	3161	1874	1297	717	713.5	1125	1068	872.5	2648	1651.5	996	1055	1444	1388.5	407
IFN-B	521	158	168.5	68	87.5	125.5	116.5	77	218	147.5	93	107.5	109	162.5	38.5
IFN-E	365	130	117	70	74	152.5	72.5	84.5	150.5	152	80	105.5	87	166.5	28.5
IFN-L2	932	323.5	243.5	124	138	264	190.5	168	397	264.5	169	217.5	191.5	294.5	74
IFN-r	787.5	98	129	29	65	66.5	96	39.5	105	101.5	76.5	70.5	40.5	143	18.5
IL-12	3614.5	2491	1677.5	749.5	855	1648	1186.5	1096.5	3668.5	2119	1162.5	1459	1748.5	1801	564
IL-15	5612	4087.5	2494	1443	1270.5	2724	1436	2001.5	4043.5	3646	1440	2692	2267.5	2509	715
Insulin	2665	1749.5	1224	861	512	1695.5	737.5	1214.5	2254.5	2287.5	978.5	1750	1374.5	1745.5	445.5
Intrinsic Factor (IF)	465	80.5	80.5	41	52.5	68	73	41.5	91	87	63	66	58	103.5	23.5
Jo-1	14575	11989.5	6488.5	4531.5	3635.5	8770	5022	6299	14072	11688	4604.5	8197.5	6675	7644.5	1970.5
KU (P70/P80)	5682	4008	2384.5	1496.5	1377	2693.5	1607	1925	5143.5	3641	1662	2915	2433	3499.5	801
La/SSB	4828.5	3726.5	1714.5	1359.5	1092	2600	1380	1756	3930.5	3191	1342	2397.5	2061	10096.5	675
Laminin	1751	920.5	604.5	300	376	572	510.5	402	1242.5	752.5	451	557.5	580.5	819.5	189
LC1	5481	3707	2247	1438	1443	2960	1900.5	1856.5	5220	3410	1749.5	2722.5	2491	3381	857
LPS	1172.5	268.5	292	91.5	184	239.5	189.5	174	332.5	294.5	366.5	201.5	223.5	347.5	73
M2	2807	1253.5	761.5	368	465	973	635.5	633	1582	1103.5	906.5	771	878	1246.5	306
MDA5	1945	856	657	115	508.5	591.5	581.5	332.5	944	752	455.5	318.5	550	669	356.5
Mi-2	1242.5	326.5	332.5	148.5	148	231.5	227.5	151.5	493.5	299.5	225	222.5	212.5	427.5	81.5
Mitochondrial antigen	1707.5	1025	666.5	353.5	384	701	499	434	1243	884.5	456	554.5	604	789.5	193.5
MPO	1626.5	901	817	402	609.5	746	859.5	407	1224.5	743	557	559	574	731	318.5
Muscarinic receptor	5041	3413	1591.5	1451.5	1195.5	3123.5	1639.5	1739.5	4259	3260.5	1365	2629	2331.5	3217.5	792
Myelin basic protein (MBP)	1349.5	393.5	569	236.5	358.5	319.5	503	182	564.5	296.5	436.5	248.5	378.5	361	306.5
Myosin	3377.5	2259.5	1435.5	883.5	893	1799	955	1238.5	2940.5	2272	1122	1754	1531	2304	489
Myosin heavy & light chain	440	221.5	64	413	21	394.5	43.5	171	27	48.0005	39	0.001	13.5	31	2
Neuropilin-1	2456.5	1514	915.5	550.5	535	1210	819.5	724.5	1843.5	1230.5	399.5	996	788.5	1083.5	283
Nucleolin	872	216.5	244	94.5	91.5	184	153.5	110	331.5	216	138	156	178.5	230.5	61.5
Nucleosome antigen	4654	2206.5	3846	1053	1918.5	3018.5	3661.5	407.5	4181	3869	3221.5	3046.5	1574	2944	543.5
Nup 62	497	66	92	43.5	32.5	81.5	74	32.5	84	95	61.5	68	43	131.5	16.5
PCNA	12406.5	9873.5	5609.5	4453.5	3378	7915.5	4100.5	5327	10351.5	8262.5	3638	6714.5	5984	8380	2017
Phosphatidyl-serine (PS)	9598.5	7661	4888.5	2922.5	2322	5575.5	3161	3847.5	8342.5	8807.5	3243	5668.5	5287	5175.5	1567.5
PL-7	6807	3875	3161	1612.5	1694	3696	2320	2778.5	6581	4769.5	2178	3603.5	2967.5	4847.5	1201
PL-12	2598.5	1555.5	1054	539.5	571	1202	770.5	776.5	2256	1504.5	745.5	1080	1141.5	1289	390
PM/Scl-75	2372	1289.5	858	286.5	434	783	606	461	1738	1343.5	619	971.5	875.5	1515.5	343.5
PM/Scl 100	1185	519	334.5	168.5	208	300.5	274	215	628	368.5	274	268	316	349.5	120.5
PR3	576	191.5	190	87	87.5	142	123.5	99.5	328	156	117	123	118.5	152	59.5
Proteoglycan	358	94	130	50	57	87	89	66.5	105	106.5	99.5	89	87.5	122	33
Prothrombin protein	1409	1105	713.5	507	493.5	941	735.5	510	1275.5	926	506	643.5	632	773.5	271.5
Ribo Phosphoprotein P0	876	432	284.5	204.5	168	300.5	252	185	484	371.5	210.5	252	253.5	369	85
Ribo Phosphoprotein P1	907.5	407.5	363.5	245.5	178	411	153	196.5	210.5	397.5	185	168.5	199.5	294	96
Ribo Phosphoprotein P2	421.5	301	227.5	486	63	278.5	70.5	9.5005	182	50.5	59.5	68.5	74	137	30
Ro/SSA (52 Kda)	2192	1553.5	1275.5	580	384	1209	680.5	676.5	2375.5	1309	687.5	1029	948	1151	369.5
Ro/SSA (60 Kda)	4515.5	3558	2415	1446	1105	2920.5	1917	1865.5	4854	3315	1730.5	2435.5	2468	2689.5	785.5
S100	576	122.5	121	47.5	82	83.5	71	53.5	111.5	82	72.5	86	44	139	21
Scl-70/Topoisomerase I	2016	837.5	1047.5	471.5	455	681	696.5	387	1262	751.5	681	588.5	636	832	292
Sm	1477.5	448.5	702.5	205.5	312.5	368.5	441	221	707	363.5	474.5	341	441.5	661.5	335
Sm/RNP	624.5	111.5	131.5	50.5	66.5	99.5	106.5	59.5	155.5	117	83	95.5	83.5	161.5	35
SmD	1305	291	336.5	111	181	247.5	236.5	151	376.5	277.5	208	192	183	396	173.5
SP100	731	179.5	208.5	70.5	98.5	256.5	154.5	148	271	203	182.5	151	177	252	55.5
Sphingomyelin	313.5	36.5	47.5	4	10	20	24	9	43.5	32	25.5	23.5	16.5	42.5	0.001
SRP54	1428	825	644	355.5	353.5	697.5	529	507.5	1122.5	837	496	595.5	617	744.5	210.5
ssDNA	13575.5	745	1065.5	464.5	225	503.5	346.5	518	891.5	551.5	2253.5	1094	398.5	3227	163
ssRNA	813	71.5	113.5	82	25.5	25	34	21	39.5	28.5	56.5	30.5	17	206	4.5
TGF-B1	455	127.5	156	79.5	80.5	109	116.5	70	152	124	97	110.5	164	137.5	69.5
Thyroglobulin	3921	2351	1621	767.5	1255	2019.5	1461	1285.5	2977.5	2221	1106	1615	1520	1589	526.5
TIF1 gama	2664	1284	671	244	602.5	827	759.5	332	828	1341.5	265.5	52.5	692.5	961	476
TNF-a	3704.5	2669.5	1701.5	1104	1110	2270	1364	1512.5	3769	2516.5	1165	1909.5	1891.5	2006	513
TPO	1714	961	638.5	532	326	675.5	521	454.5	1192	799.5	458	613	594	776.5	210
Troponin-I	508	313.5	197	168.5	209.5	268.5	213	138.5	400	189.5	200	241	164.5	342	72.5
TTG	8635	8685.5	5046.5	3134.5	2909.5	6376	3754.5	4133	10230.5	6898.5	3285	5701	5087.5	6230.5	1746.5
TWEAK	1036	221	301	137	157.5	228.5	218.5	146.5	347	259	225	197.5	213	252.5	76
U1-snRNP 68/70	2668.5	1815.5	1771.5	1093	1481	1583	1620	1004.5	2239.5	1338.5	1440	1222	1503	1450.5	1101.5
U1-snRNP A	4144.5	1638	2342.5	921	2165	1341	2051	1012.5	2928.5	1144.5	2003.5	1293.5	1921	2608.5	1388.5
U1-snRNP B/B'	1035.5	241.5	464.5	39	195	114	248.5	69.5	297	195	219.5	175.5	186	214.5	98
U1-snRNP C	1618.5	768.5	732.5	384	448	609	520	388	913.5	589	443	468.5	467	609.5	263
Vimentin	1071	391.5	305	83	176.5	307.5	257.5	220	451.5	345	322.5	272	223.5	444.5	99.5
Vitronectin	1211	603	526	258	359	450.5	437	328.5	745	498.5	291	411	406	504	234
anti-Ig control 1	23640.5	25425.5	19223	20478	17389	23130	21942.5	20097	29552	25909	16170	27164.5	21596	28276.5	13194.5
anti-Ig control 2	12283	12054.5	10622	4983.5	10013	2931	12217.5	4032	14354.5	7585	8697	6363	12566.5	7489.5	7244.5
anti-Ig control 3	6463.5	4466.5	4573.5	3973.5	4549	4296.5	5575.5	3209.5	7181.5	4898	3727	4277.5	4670.5	4772	3112
anti-Ig control 4	2166.5	1710	1425	1037.5	933.5	1366.5	1602	1057.5	2163	1435	912.5	1419	1578	1627.5	972
Ig control 1	65201	65109.5	62330.5	19776	64391.5	65401	62138.5	65409	65365.5	61662	65371	65391.5	58112	65367	65411.5
Ig control 2	65194	55910	42382.5	65405	65339	65393	65359.5	65396.5	65356	65285.5	65359	65379.5	65367	54728.5	65401
Ig control 3	53451.5	32492.5	48551.5	44041	54937	44886.5	52011	42908.5	52295.5	52238.5	44818.5	41010.5	40271.5	45646	48436
Ig control 4	35469	20967.5	28955	27678.5	32074.5	21262.5	32027	23967	27973.5	25464.5	25288.5	22528.5	22222.5	21752.5	23382.5

## Sheet: IgM_NSI-nor
ID	S2	S3	S4	S5	L1	L2	L3	A1	A2	A3	A4	C1	C2	C3	C4
Aggrecan	703.867	131.263	72.3521	134.638	40.07	212.372	43.2074	149.261	377.63	352.435	60.8438	127.309	199.791	214.067	70.1114
AGTR	726.306	270.248	187.387	115.713	101.327	234.567	144.651	175.394	208.591	205.83	272.066	195.821	149.042	253.807	74.0338
Alpha-actinine	265.61	31.437	64.5443	11.8957	28.0951	17.6556	31.9359	12.5641	34.3728	20.3888	46.0039	30.1656	22.4365	68.8828	10.7864
Alpha Fodrin	1245.16	791.991	531.449	370.93	294.768	629.044	502.991	345.763	980.331	700.986	720.232	576.725	586.553	964.889	191.703
Amyloid	288.508	24.2671	52.0519	6.48857	14.7384	8.57558	32.8752	7.53844	10.3589	20.8742	22.7546	16.8723	7.47882	53.5167	6.86406
AQP4	7589.58	5330.5	2912.82	2101.76	1523.58	4621.73	2342.13	3185.24	4931.32	4659.32	1792.67	4388.33	2674.21	5682.3	848.692
B2-microglobulin	630.137	270.248	285.765	110.846	99.9448	167.98	142.772	96.9946	374.805	217.48	163.239	169.234	223.296	202.939	33.83
B2 glycoprotein 1	2553.52	2137.71	1184.18	1052.77	726.327	1808.94	1139.83	969.946	2241.3	1932.08	925.518	1612.07	1253.77	1937.2	378.013
B-actin	6236.8	6944.81	3251.68	2610.57	1990.61	4492.09	2372.18	2932.95	6730.01	5506.92	2202.74	4249.26	3875.1	5377.1	1151.69
BPI	2306.69	1747.79	1175.33	781.333	629.146	1400.85	807.322	1018.19	2706.51	1544.69	1034.84	1355.92	1289.03	1923.95	347.615
Calprotectin	8303.06	7308.27	3960.11	2634.36	2142.14	4747.84	2494.76	2818.87	7510.22	5569.54	2894.78	4127.06	4355.88	5213.37	1233.08
Cardolipin	1037.25	504.646	386.225	306.044	159.82	313.765	364.445	268.368	416.711	663.607	231.503	288.874	305.563	387.333	63.7377
CD4	3397.52	2929.15	1862.42	951.658	952.469	1920.42	1158.15	1254.4	3660.47	2486.95	1229.24	1904.01	1681.13	2143.32	464.304
CD8	2697.32	2024.1	1373.65	878.661	700.995	1704.52	1354.93	908.13	2889.2	1593.24	1017.03	1470.44	1414.57	1883.15	381.445
CENP-A	1627.09	871.411	632.951	299.015	253.777	510.499	349.886	268.368	458.147	578.653	79.6411	428.965	282.058	797.981	87.7619
CENP-B	7330.84	4447.5	2062.29	1671.35	1130.25	2969.17	1821.76	1690.62	4090.83	3060.26	1631.9	2626.96	2071.1	3458.45	742.789
Chondroitin Sulfate	392.004	105.341	71.8316	29.7393	28.0951	42.8779	51.1914	23.6204	76.7502	52.9138	52.4345	48.5717	37.3941	131.407	11.767
COL17A1	216.152	130.712	107.747	0.001	77.3766	0.001	99.0953	17.5897	165.743	0.001	92.5024	0.001	115.922	502.845	60.7959
Collagen I	303.162	52.3949	65.5853	25.9543	23.9499	35.8156	47.4343	21.1076	43.3191	45.6321	36.6052	34.2558	27.7785	65.7036	11.2767
Collagen II	390.172	68.9407	106.706	22.1693	39.1489	44.3912	79.3702	20.6051	73.9251	42.2339	50.9505	37.8348	52.8859	75.2412	14.7087
Collagen III	522.061	80.5228	94.2139	17.3029	41.4518	34.8068	73.2648	18.5948	40.9648	46.603	51.4452	37.8348	27.7785	121.34	6.86406
Collagen IV	606.782	272.454	188.948	118.416	120.21	200.769	188.328	118.605	239.668	220.879	100.912	174.858	138.892	264.404	47.5581
Collagen V	510.613	242.671	218.097	131.934	153.372	192.194	218.855	79.9074	298.996	249.035	134.054	213.716	165.602	247.978	58.3445
Collagen VI	14525.7	2014.17	2186.18	1099.81	675.664	1481.56	976.864	1209.17	2229.05	1807.32	3288.04	2022.12	1258.04	4579.65	362.324
complement C1q	6055.91	6188.12	3581.69	2736.02	2014.1	5167.04	2819.29	2892.25	6868.44	5357.88	2194.83	4477.8	3925.85	5564.67	1249.75
complement C3/C3a	1884	1135.04	1274.75	127.068	1020.17	282.994	1385.93	509.096	3013.98	268.452	1008.62	258.197	1327.49	765.659	560.401
Core Histone	2592.45	579.102	780.778	225.478	695.929	330.916	438.649	367.876	680.864	426.223	810.756	428.454	395.309	1233	166.699
CRP	36438	28138.8	18252	14175.9	11000.8	24521.6	11548.1	16470.5	31026.4	23486.9	12821.7	19560.1	20266	22319.1	6233.54
dsDNA	1900.49	849.901	622.02	291.445	295.689	468.126	436.301	331.691	1058.49	705.841	378.913	473.446	529.394	891.768	152.97
EBNA1	7005.7	5450.18	2963.83	1649.72	1606.03	3195.66	2089.46	1915.77	4532.03	4413.69	1585.4	2954.69	2449.85	3556.47	825.648
Elastin	1405.44	665.692	420.058	276.305	246.408	493.852	342.842	301.537	684.631	536.419	349.234	445.837	408.664	660.215	125.514
Factor B	6485.92	4662.05	3243.87	1727.58	1509.3	3662.78	2301.74	2357.52	6330.72	4136.01	2221.54	3373.94	3442.93	4105.95	875.658
Factor D	621.436	102.584	143.143	45.9607	54.3479	99.3758	94.3989	62.8203	99.3515	136.411	87.5557	102.256	57.1596	229.963	19.1213
Factor H	2837.91	2400.24	1385.62	993.293	853.906	1912.35	1453.55	1110.66	2869.89	2041.79	1048.69	1704.1	1431.13	2129.54	479.994
Factor I	3213.42	2851.94	1667.74	1251.21	898.122	2264.46	1343.66	1323.75	3618.56	2622.39	1167.9	2093.7	1816.82	2604.83	618.746
Factor P	729.97	200.755	165.004	107.602	93.4968	180.592	147.469	134.687	237.314	195.635	133.065	145.204	137.824	239.5	55.4027
Fibrinogen IV	2193.57	1007.64	737.054	343.354	382.738	697.648	535.866	465.373	1181.86	842.251	500.601	672.846	641.042	965.419	221.611
Fibrinogen S	2379.96	1140	780.778	422.298	427.414	777.351	594.572	516.132	1390.45	985.944	553.53	772.546	729.185	994.032	227.985
Fibronectin	2485.74	1892.28	1062.9	715.365	619.013	1260.11	863.21	865.413	2091.56	1498.09	734.578	1181.57	1103.13	1538.21	342.713
GAD65/GAD2	2254.02	2322.48	1096.21	849.463	555.914	1385.71	717.619	881.997	1844.83	1625.76	673.239	1315.53	1096.72	1683.39	383.897
GBM	1063.36	488.1	193.112	35.1464	93.4968	445.93	146.06	150.266	203.412	633.023	215.674	368.634	329.602	625.774	110.805
GDF-15	417.191	55.1526	64.0238	19.4657	26.7134	46.9135	45.5557	39.7024	33.9019	45.6321	68.7584	40.3912	17.0944	93.2568	7.84464
GM-CSF	2194.03	1738.96	1044.16	639.665	549.466	1247.49	792.293	749.321	2037.88	1255.37	726.168	1021.54	1036.89	1204.92	309.373
GP2	3910.88	3020.16	1916.55	1265.81	1068.53	2710.39	1416.92	1455.42	3943.46	2882.1	1282.17	2421.43	2108.49	2958.78	607.959
GP210	1540.54	794.749	802.119	132.475	558.217	581.626	676.76	307.066	811.292	593.702	400.679	482.649	461.55	1121.2	174.543
Hemocyanin	20795.9	15798.5	11203.1	6189.56	5159.82	11349.5	6291.38	8268.66	17314.5	16908.1	6928.77	11997.7	11372.6	13737.4	3120.69
Heparan Sulphate	490.005	66.1831	85.8856	18.925	32.2403	30.2667	55.8879	21.1076	46.1443	52.4283	51.4452	47.0379	21.3681	89.0178	6.37377
Heparin	898.953	332.019	151.991	90.84	83.8247	147.803	123.987	92.4715	227.426	189.324	248.322	212.693	118.593	240.03	46.0872
Histone H1	7781.46	4252.82	11003.8	847.3	3249.36	2694.24	8931.73	0.00100512	10108.9	4145.72	4115.12	3025.25	2063.62	4446.65	1814.07
Histone H2A	1054.2	196.895	355.514	108.684	195.284	123.085	198.191	70.3587	263.211	134.954	258.215	132.933	117.524	704.194	76.4852
Histone H2B	1478.72	464.936	612.13	277.387	329.311	300.65	390.276	188.461	513.709	332.046	391.775	315.461	331.205	897.596	184.349
Histone H3	801.868	197.446	347.706	92.4622	162.583	142.254	193.494	69.8562	245.318	181.072	190.446	146.226	136.756	256.986	60.7959
Histone H4	472.603	51.2919	95.7754	27.0357	32.7008	50.949	57.2968	28.1435	53.2072	65.05	47.4878	52.1507	33.1205	83.7191	7.35435
IA2	2376.75	1324.76	1074.87	542.337	508.936	1009.9	798.868	706.1	1920.64	1363.62	741.998	1007.22	1044.9	1425.87	317.708
IFN-A1	2895.15	2067.12	1350.23	775.385	657.241	1135	1003.16	876.972	2493.68	1603.43	985.373	1078.8	1542.77	1471.44	399.096
IFN-B	477.182	174.282	175.415	73.5372	80.6007	126.616	109.428	77.3946	205.295	143.207	92.0077	109.925	116.456	172.207	37.7523
IFN-E	334.302	143.397	121.801	75.7	68.1651	153.856	68.0987	84.9331	141.729	147.576	79.1464	107.88	92.9511	176.446	27.9465
IFN-L2	853.616	356.837	253.493	134.097	127.119	266.347	178.935	168.861	373.863	256.802	167.197	222.407	204.599	312.092	72.5629
IFN-r	721.269	108.099	134.294	31.3614	59.8748	67.0913	90.172	39.7024	98.8807	98.5458	75.6838	72.0907	43.2703	151.542	18.1407
IL-12	3310.51	2747.7	1746.34	810.531	787.584	1662.65	1114.47	1102.12	3454.7	2057.33	1150.1	1491.92	1868.1	1908.58	553.047
IL-15	5140.01	4508.72	2596.35	1560.5	1170.32	2748.22	1348.82	2011.76	3807.85	3539.88	1424.64	2752.74	2422.6	2658.88	701.114
Insulin	2440.87	1929.79	1274.23	931.11	471.629	1710.58	692.728	1220.72	2123.11	2220.92	968.06	1789.48	1468.52	1849.77	436.848
Intrinsic Factor (IF)	425.892	88.7956	83.8035	44.3386	48.3604	68.6046	68.5683	41.7127	85.6966	84.4678	62.3278	67.4891	61.9674	109.683	23.0436
Jo-1	13349.2	13225	6754.77	4900.5	3348.84	8847.98	4717.13	6331.28	13251.9	11347.8	4555.37	8382.46	7131.59	8101.15	1932.23
KU (P70/P80)	5204.13	4421.03	2482.35	1618.36	1268.42	2717.45	1509.44	1934.87	4843.74	3535.03	1644.27	2980.77	2599.42	3708.55	785.444
La/SSB	4422.41	4110.52	1784.86	1470.2	1005.9	2623.12	1296.22	1765	3701.43	3098.13	1327.68	2451.59	2201.98	10699.6	661.891
Laminin	1603.74	1015.36	629.307	324.429	346.353	577.086	479.509	404.06	1170.09	730.598	446.188	570.079	620.208	868.454	185.33
LC1	5020.03	4089.01	2339.21	1555.1	1329.22	2986.32	1785.12	1866.01	4915.78	3310.75	1730.83	2783.93	2661.39	3582.97	840.357
LPS	1073.89	296.169	303.983	98.9508	169.492	241.63	177.996	174.892	313.122	285.929	362.59	206.046	238.788	368.258	71.5823
M2	2570.92	1382.68	792.75	397.966	428.335	981.651	596.92	636.244	1489.8	1071.38	896.828	788.396	938.058	1320.96	300.057
MDA5	1781.42	944.212	683.961	124.364	468.405	596.759	546.198	334.204	888.984	730.113	450.64	325.686	587.622	708.963	349.577
Mi-2	1138	360.146	346.145	160.592	136.33	233.558	213.689	152.276	464.739	290.783	222.599	227.52	227.036	453.037	79.9172
Mitochondrial antigen	1563.89	1130.63	693.851	382.285	353.722	707.233	468.707	436.224	1170.56	858.756	451.135	567.011	645.315	836.661	189.742
MPO	1489.71	993.849	850.527	434.735	561.441	752.633	807.322	409.086	1153.14	721.375	551.057	571.612	613.263	774.667	312.315
Muscarinic receptor	4617.04	3764.71	1656.81	1569.69	1101.24	3151.27	1539.97	1748.41	4010.79	3165.6	1350.44	2688.32	2490.98	3409.7	776.619
Myelin basic protein (MBP)	1236	434.051	592.35	255.758	330.232	322.341	472.464	182.933	531.601	287.87	431.843	254.107	404.391	382.565	300.548
Myosin	3093.44	2492.34	1494.41	955.443	822.587	1815	897.024	1244.85	2769.13	2205.87	1110.03	1793.57	1635.72	2441.63	479.503
Myosin heavy & light chain	402.995	244.326	66.6264	446.63	19.3442	398.008	40.8592	171.876	25.4265	46.6034	38.5839	0.001	14.4234	32.8518	1.96116
Neuropilin-1	2249.9	1670.02	953.069	595.327	492.815	1220.76	769.75	728.213	1736.06	1194.69	395.237	1018.47	842.436	1148.22	277.504
Nucleolin	798.662	238.811	254.013	102.195	84.2853	185.636	144.181	110.564	312.18	209.713	136.528	159.52	190.71	244.269	60.3056
Nucleosome antigen	4262.58	2433.88	4003.83	1138.74	1767.23	3045.34	3439.22	409.588	3937.33	3756.39	3187.13	3115.24	1681.67	3119.86	532.945
Nup 62	455.201	72.8014	95.7754	47.0422	29.9374	82.2247	69.5076	32.6666	79.1045	92.235	60.8438	69.5342	45.9413	139.355	16.1796
PCNA	11363.1	10891	5839.7	4816.14	3111.65	7985.88	3851.57	5354.3	9748.22	8022.02	3599.18	6866	6393.32	8880.59	1977.83
Phosphatidyl-serine (PS)	8791.24	8450.48	5089.11	3160.48	2138.91	5625.07	2969.1	3867.22	7856.3	8551.16	3208.4	5796.4	5648.65	5484.66	1537.06
PL-7	6234.51	4274.32	3290.72	1743.8	1560.43	3728.86	2179.16	2792.74	6197.46	4630.68	2154.76	3684.8	3170.49	5137.07	1177.68
PL-12	2379.96	1715.8	1097.25	583.431	525.977	1212.69	723.725	780.48	2124.52	1460.71	737.546	1104.37	1219.58	1366	382.426
PM/Scl-75	2172.51	1422.38	893.21	309.829	399.779	789.962	569.211	463.363	1636.71	1304.4	612.395	993.419	935.387	1606.03	336.829
PM/Scl 100	1085.34	572.484	348.227	182.221	191.599	303.172	257.366	216.102	591.401	357.775	271.076	274.047	337.615	370.378	118.16
PR3	527.557	211.234	197.797	94.0843	80.6007	143.263	116.003	100.01	308.884	151.46	115.752	125.775	126.606	161.08	58.3445
Proteoglycan	327.891	103.687	135.335	54.0715	52.5056	87.7736	83.597	66.8408	98.8807	103.4	98.4384	91.0081	93.4853	129.288	32.3591
Prothrombin protein	1290.5	1218.87	742.78	548.285	454.588	949.367	690.849	512.614	1201.16	899.049	500.601	658.019	675.231	819.706	266.227
Ribo Phosphoprotein P0	802.326	476.518	296.175	221.152	154.753	303.172	236.702	185.948	455.793	360.687	208.254	257.686	270.84	391.043	83.3493
Ribo Phosphoprotein P1	831.177	449.494	378.417	265.491	163.965	414.654	143.712	197.507	198.232	385.931	183.026	172.302	213.146	311.562	94.1356
Ribo Phosphoprotein P2	386.051	332.019	236.836	525.575	58.0325	280.976	66.2201	9.54919	171.393	49.0302	58.8651	70.0455	79.0618	145.184	29.4174
Ro/SSA (52 Kda)	2007.65	1713.59	1327.84	627.229	353.722	1219.75	639.188	679.967	2237.06	1270.9	680.165	1052.22	1012.85	1219.76	362.324
Ro/SSA (60 Kda)	4135.73	3924.66	2514.1	1563.75	1017.87	2946.47	1800.62	1875.06	4571.11	3218.52	1712.04	2490.45	2636.82	2850.16	770.245
S100	527.557	135.124	125.965	51.3679	75.5343	84.2424	66.6897	53.7742	105.002	79.6134	71.7264	87.9404	47.0097	147.303	20.5922
Scl-70/Topoisomerase I	1846.45	923.806	1090.49	509.894	419.123	687.055	654.217	388.983	1188.45	729.627	673.734	601.778	679.504	881.7	286.329
Sm	1353.24	494.719	731.329	222.234	287.859	371.777	414.228	222.133	665.796	352.92	469.437	348.694	471.7	701.015	328.494
Sm/RNP	571.978	122.99	136.896	54.6122	61.2565	100.385	100.035	59.8049	146.438	113.595	82.1144	97.6547	89.2116	171.147	34.3203
SmD	1195.25	320.988	350.309	120.039	166.728	249.701	222.143	151.774	354.558	269.423	205.781	196.332	195.518	419.655	170.131
SP100	669.521	197.998	217.056	76.2408	90.7333	258.781	145.121	148.758	255.206	197.092	180.553	154.407	189.107	267.053	54.4222
Sphingomyelin	287.134	40.2614	49.4493	4.32572	9.2115	20.1778	22.543	9.04612	40.9648	31.0686	25.2279	24.0302	17.6286	45.0388	0.00098058
SRP54	1307.9	910.018	670.428	384.448	325.627	703.702	496.886	510.101	1057.08	812.639	490.708	608.936	659.205	788.973	206.412
ssDNA	12433.8	821.773	1109.23	502.324	207.259	507.977	325.465	520.655	839.544	535.448	2229.46	1118.68	425.759	3419.77	159.834
ssRNA	744.624	78.8682	118.158	88.6772	23.4893	25.2223	31.9359	21.1076	37.198	27.6705	55.8972	31.1882	18.1629	218.306	4.41261
TGF-B1	416.733	140.639	162.402	85.9736	74.1526	109.969	109.428	70.3587	143.142	120.391	95.965	112.993	175.218	145.714	68.1503
Thyroglobulin	3591.23	2593.27	1687.52	829.997	1156.04	2037.46	1372.31	1292.09	2803.97	2156.36	1094.2	1651.44	1623.97	1683.92	516.275
TIF1 gama	2439.95	1416.32	698.536	263.869	554.993	834.353	713.392	333.701	779.745	1302.46	262.667	53.6845	739.869	1018.41	466.756
TNF-a	3392.94	2944.6	1771.32	1193.9	1022.48	2290.18	1281.19	1520.25	3549.35	2443.26	1152.57	1952.58	2020.88	2125.83	503.037
TPO	1569.85	1060.03	664.702	575.32	300.295	681.506	489.371	456.829	1122.53	776.23	453.113	626.831	634.631	822.885	205.922
Troponin-I	465.276	345.807	205.084	182.221	192.981	270.887	200.069	139.21	376.688	183.985	197.866	246.438	175.752	362.43	71.092
TTG	7908.77	9580.55	5253.59	3389.74	2680.09	6432.69	3526.57	4154.18	9634.27	6697.72	3249.95	5829.63	5435.5	6602.68	1712.58
TWEAK	948.869	243.774	313.352	148.156	145.081	230.532	205.235	147.251	326.777	251.462	222.599	201.956	227.57	267.583	74.5241
U1-snRNP 68/70	2444.07	2002.59	1844.2	1182	1364.22	1597.08	1521.65	1009.65	2108.98	1299.54	1424.64	1249.57	1605.81	1537.15	1080.11
U1-snRNP A	3795.94	1806.8	2438.63	995.996	1994.29	1352.92	1926.49	1017.69	2757.83	1111.19	1982.12	1322.68	2052.4	2764.32	1361.53
U1-snRNP B/B'	948.411	266.387	483.562	42.1757	179.624	115.014	233.414	69.8562	279.691	189.324	217.158	179.46	198.723	227.313	96.0968
U1-snRNP C	1482.38	847.695	762.56	415.269	412.675	614.415	488.432	389.988	860.262	571.857	438.273	479.071	498.944	645.909	257.892
Vimentin	980.926	431.845	317.516	89.7586	162.583	310.234	241.868	221.127	425.187	334.959	319.059	278.137	238.788	471.053	97.5677
Vitronectin	1109.15	665.14	547.586	279.009	330.693	454.506	410.471	330.184	701.582	483.991	287.895	420.273	433.772	534.107	229.456
anti-Ig control 1	21652.3	28045.6	20011.9	22145.5	16017.9	23335.7	20610.4	20200	27829.7	25154.9	15997.5	27777.4	23073.2	29965.6	12938.3
anti-Ig control 2	11250	13296.7	11057.9	5389.3	9223.48	2957.06	11475.8	4052.66	13517.9	7364.24	8604.2	6506.56	13426.1	7936.89	7103.81
anti-Ig control 3	5919.9	4926.78	4761.18	4297.06	4190.31	4334.7	5237.02	3225.95	6762.97	4755.44	3687.23	4374.01	4989.98	5057.06	3051.56
anti-Ig control 4	1984.29	1886.22	1483.48	1121.98	859.894	1378.65	1504.75	1062.92	2036.94	1393.23	902.764	1451.02	1685.94	1724.72	953.123
Ig control 1	59717.4	71819.1	64888.4	21386.3	59314.3	65982.5	58366.2	65744.2	61556	59867.3	64673.5	66866.9	62087	69271.8	64141.2
Ig control 2	59711	61671.6	44121.8	70730.9	60187	65974.4	61391.7	65731.7	61547.1	63385.4	64661.6	66854.6	69838.3	57997.8	64130.9
Ig control 3	48956.1	35840.9	50543.9	47627.2	50605.2	45285.6	48853.5	43128.4	49247.8	50718.1	44340.3	41935.8	43026.2	48372.7	47495.4
Ig control 4	32486	23128.2	30143.2	29932.3	29545.4	21451.6	30082.7	24089.8	26343.2	24723.4	25018.7	23036.8	23742.6	23051.9	22928.4

## Sheet: IgM_SBR
ID	S2	S3	S4	S5	L1	L2	L3	A1	A2	A3	A4	C1	C2	C3	C4
Aggrecan	3.45167	1.70149	1.39596	1.81917	1.27228	2.35737	1.26635	2.01498	3.33402	2.40233	1.33683	1.8019	2.14667	2.02807	1.46542
AGTR	3.2093	2.28219	2.01944	1.54749	1.7219	2.25	1.92117	1.98991	2.26431	1.68907	2.65004	2.08434	1.82365	2.14096	1.51551
Alpha-actinine	1.83228	1.16952	1.37454	1.08202	1.18681	1.11223	1.1978	1.08591	1.19425	1.02359	1.26426	1.20079	1.12537	1.34682	1.07701
Alpha Fodrin	5.10851	5.39171	3.85427	3.4505	2.95204	5.10414	4.12329	3.35857	6.70114	3.89377	5.11733	4.67963	4.36749	5.8142	2.30887
Amyloid	1.91126	1.12331	1.29637	1.04259	1.08547	1.04172	1.19955	1.04838	1.0331	1.02115	1.11602	1.1022	1.02682	1.25096	1.0499
AQP4	14.9117	17.6061	10.6142	8.84332	6.79376	17.6616	9.38711	13.2821	17.5625	11.7085	7.11704	16.8708	9.80734	17.1925	4.55786
B2-microglobulin	2.89731	2.45663	2.64097	1.7217	1.63483	2.04434	1.89231	1.66171	3.2279	1.82587	1.97983	2.03313	2.25944	1.98946	1.25805
B2 glycoprotein 1	6.9885	9.4063	6.07986	6.04412	4.47488	9.43517	6.27672	5.88634	10.8945	6.41114	5.08154	8.44193	6.30642	7.92778	3.02966
B-actin	21.8949	36.1305	18.8097	16.4039	13.9058	27.9408	15.7917	19.7053	40.4594	21.9725	13.3575	26.7631	22.8535	26.4793	8.55947
BPI	4.73381	5.64121	4.42355	3.39802	3.15282	5.37714	3.55227	4.34191	9.18004	3.94976	4.08476	5.21948	4.86345	5.63398	2.24758
Calprotectin	20.9115	31.1624	17.8917	13.7542	11.7888	23.8689	12.6815	15.1275	34.1758	17.9683	14.2206	20.0723	19.7393	20.2653	7.54152
Cardolipin	3.75435	3.51094	2.82004	2.76033	1.93663	2.81096	3.00209	2.64617	3.08544	3.37227	2.25322	2.69178	2.52825	2.75706	1.39087
CD4	7.84563	11.6447	8.29219	5.07745	5.3309	9.13252	5.93639	6.71325	15.9137	7.63633	6.1282	9.16446	7.6822	8.25638	3.25285
CD8	7.69905	10.1684	7.57563	5.64652	4.96769	9.82885	8.10661	6.05132	15.341	6.10963	6.26176	8.77112	7.84852	8.82466	3.32104
CENP-A	3.8878	3.89676	3.20606	2.17258	2.0851	2.88284	2.36327	2.06819	2.69564	2.11717	1.27076	2.62082	1.96506	3.26657	1.42687
CENP-B	14.5541	15.6915	8.42313	7.76446	5.8375	12.4345	8.26784	8.22858	16.5025	8.2362	7.11766	11.1223	8.41342	11.8638	4.38284
Chondroitin Sulfate	2.27685	1.55758	1.40404	1.18372	1.18776	1.25742	1.32545	1.15243	1.45103	1.14684	1.31959	1.30701	1.21611	1.64558	1.07783
COL17A1	1.53667	1.60052	1.60898	1.001	1.54184	1.001	1.60811	1.04777	1.90486	1.001	1.5335	1.001	1.67395	2.37693	1.4575
Collagen I	1.92153	1.25807	1.39157	1.12931	1.20044	1.20224	1.33089	1.13557	1.3074	1.12096	1.2374	1.20761	1.17136	1.3111	1.1005
Collagen II	1.8958	1.33001	1.46303	1.12414	1.18815	1.23997	1.37463	1.10889	1.3232	1.04396	1.26639	1.18771	1.2382	1.28411	1.08678
Collagen III	2.50818	1.43567	1.55908	1.10729	1.27749	1.21057	1.45901	1.12061	1.23541	1.11697	1.3259	1.23449	1.15533	1.60056	1.0453
Collagen IV	2.67165	2.42882	2.0584	1.73409	1.80147	2.22657	2.12595	1.77929	2.39971	1.74847	1.60888	2.06554	1.78509	2.2515	1.33494
Collagen V	2.15075	2.05657	2.04284	1.71835	1.87949	2.01296	2.11887	1.43905	2.56592	1.68861	1.71118	2.12671	1.80684	2.00737	1.35293
Collagen VI	30.7217	8.5068	9.96241	6.00925	4.24632	7.56517	5.32258	6.76623	10.7983	5.88446	15.3469	9.86942	6.09463	17.2285	2.84102
complement C1q	10.4255	16.3535	10.3419	8.7973	7.66997	15.763	9.37438	9.99561	21.1474	10.4241	7.52947	14.3397	11.9913	14.0191	5.01202
complement C3/C3a	8.25911	7.65061	8.98394	1.79685	9.17849	2.84417	11.0047	4.70477	22.3112	2.14115	8.34008	2.72114	9.45754	5.20675	5.446
Core Histone	7.70471	3.26558	4.59682	1.99899	4.8994	2.53443	3.18753	2.84364	4.3452	2.19169	5.13514	3.06412	2.7297	5.70886	1.95061
CRP	55.5992	74.0427	51.3637	44.6928	36.9855	75.1891	35.4052	51.5839	94.137	45.1371	40.6758	58.0523	59.3349	54.1016	23.3472
dsDNA	6.31861	5.36681	4.62909	2.84637	3.03668	3.8666	3.73439	3.17128	7.70144	3.60756	3.41232	3.86719	4.20331	5.23817	2.12165
EBNA1	15.9144	22.5327	13.9549	8.92819	9.67188	15.5369	11.1055	10.5244	22.0453	13.0039	8.52756	14.5253	11.6295	13.9909	5.53168
Elastin	4.74178	4.23039	3.27329	2.65085	2.57138	3.80607	2.97244	2.84706	4.99896	2.78733	3.04677	3.52654	3.23162	3.93643	1.83844
Factor B	14.5984	18.4721	14.646	8.8614	8.39098	17.3161	11.6379	12.4154	29.7271	12.4737	10.976	15.9441	15.5928	15.5527	5.60899
Factor D	3.04428	1.51374	1.78274	1.2698	1.39108	1.58789	1.59391	1.40394	1.60493	1.45394	1.55324	1.63729	1.32855	2.09478	1.13289
Factor H	8.11489	10.7557	7.09271	5.53821	5.75569	9.92071	8.19971	6.51563	15.3079	7.04617	6.14742	9.0763	7.29238	9.00144	3.63845
Factor I	10.0444	13.3534	9.44221	7.30028	6.59574	12.6564	8.62021	8.4633	21.0638	9.72816	7.45293	12.2182	9.7074	12.2102	4.89116
Factor P	3.41499	2.05093	1.96901	1.6076	1.7117	2.05923	2.0078	1.85211	2.60475	1.73044	1.85886	1.88654	1.84318	2.23013	1.41479
Fibrinogen IV	6.90719	5.6411	4.98939	2.97531	3.59118	4.8961	4.16564	3.8107	7.99399	3.92694	3.92534	4.81929	4.39101	5.30708	2.53124
Fibrinogen S	6.85499	6.0564	4.78321	3.33516	3.63937	5.22064	4.27136	4.06329	8.00454	4.34102	3.86146	5.26368	4.40654	5.38193	2.48032
Fibronectin	7.34335	9.93373	6.5068	5.09075	4.8989	7.97593	5.9536	6.23345	12.8367	6.11482	5.14689	7.67056	6.90935	7.93529	3.27663
GAD65/GAD2	6.08709	10.2891	6.17405	5.25194	4.03803	7.70851	4.65897	5.68621	10.3987	5.83423	4.28106	7.39038	6.1753	7.4482	3.24421
GBM	3.54914	3.11191	1.89974	1.1643	1.58015	3.18436	1.79863	1.79903	2.09846	2.70346	2.12307	2.89032	2.63749	3.37414	1.67131
GDF-15	2.49221	1.31394	1.41504	1.12534	1.22095	1.30833	1.32991	1.28492	1.23192	1.14388	1.4707	1.28323	1.10148	1.49201	1.06966
GM-CSF	8.37163	10.0026	7.32815	4.80502	5.13082	8.77559	6.42955	6.14348	14.5807	5.88452	5.72126	7.60253	7.04771	7.2514	3.3578
GP2	12.4227	14.2441	11.6591	7.36935	8.34941	15.3613	9.75871	9.75851	24.6427	10.7809	8.55148	14.8907	12.4722	14.8586	5.23306
GP210	3.00415	3.06476	3.23814	1.35158	3.08802	2.64966	3.22782	1.87571	3.40359	1.78017	2.13533	2.36144	2.18256	3.38219	1.63829
Hemocyanin	39.1466	57.3172	45.2015	28.2527	26.7305	48.5844	29.5696	38.3507	75.4824	44.8493	31.3013	50.2568	47.8179	46.6074	17.3972
Heparan Sulphate	2.26178	1.316	1.48789	1.11077	1.212	1.15507	1.34311	1.12693	1.273	1.11275	1.30747	1.2687	1.10984	1.40508	1.04862
Heparin	3.66095	2.7317	1.91089	1.57297	1.59805	1.90555	1.81285	1.6362	2.49191	1.6739	2.56621	2.34005	1.71845	2.19156	1.35706
Histone H1	1.35214	1.6288	3.18553	1.09362	1.80618	1.47224	2.99279	1.001	3.15969	1.1078	1.82601	1.63673	1.33134	1.54214	1.48183
Histone H2A	3.93707	1.90506	2.84035	1.55761	2.27729	1.65054	2.17403	1.40455	2.50693	1.33589	2.40336	1.73744	1.59414	3.9827	1.51226
Histone H2B	4.16997	2.66391	3.55909	2.11602	2.71087	2.24288	2.84209	1.86012	3.34375	1.68851	2.70026	2.38338	2.37555	4.08478	1.97917
Histone H3	3.07201	1.83065	2.77312	1.43985	2.0346	1.6883	2.08672	1.37915	2.33205	1.42	2.01249	1.76691	1.68251	2.06766	1.41185
Histone H4	2.55342	1.25699	1.56739	1.14288	1.26065	1.2824	1.39435	1.17322	1.36072	1.17525	1.31546	1.30984	1.20593	1.4122	1.06573
IA2	7.37891	7.01659	6.97326	4.08496	4.52932	6.51309	5.8882	5.276	12.2269	5.63366	5.289	6.74416	6.92218	7.58635	3.33999
IFN-A1	9.57159	12.227	9.10111	5.94929	5.79278	8.00038	7.66459	6.94655	16.9987	7.21312	7.21194	7.89161	10.4393	8.5741	4.16726
IFN-B	2.20957	1.86687	1.9722	1.44785	1.54091	1.73184	1.66965	1.50617	2.24694	1.44933	1.51801	1.6492	1.66561	1.80509	1.28663
IFN-E	1.95239	1.70428	1.66389	1.40757	1.467	1.89725	1.41295	1.5415	1.84623	1.46129	1.4492	1.66306	1.50036	1.79886	1.19465
IFN-L2	3.75202	2.87355	2.46566	1.75036	1.92194	2.6063	2.18419	2.10767	3.44094	1.92441	2.03738	2.40297	2.21509	2.51506	1.53599
IFN-r	3.27699	1.54613	1.79334	1.16034	1.44464	1.38909	1.6017	1.24928	1.61603	1.29321	1.4575	1.43988	1.24083	1.71439	1.13806
IL-12	11.7303	15.6141	11.4391	5.76953	6.84767	11.3409	8.40684	8.29909	23.5022	8.91824	8.25386	10.5087	12.1633	11.0439	5.14314
IL-15	18.159	24.1991	16.5198	10.4241	9.58564	17.9714	9.36737	14.5877	18.3196	15.2523	6.90219	18.6769	9.89362	15.5313	6.44211
Insulin	7.52388	10.194	8.02782	6.35723	4.2133	10.7157	5.09007	8.56702	11.5259	8.90287	5.88885	11.517	8.62872	9.88903	4.2001
Intrinsic Factor (IF)	2.00991	1.31683	1.36974	1.18355	1.29076	1.29533	1.38359	1.20834	1.47981	1.13277	1.33956	1.30006	1.31304	1.40849	1.13865
Jo-1	28.5103	51.3115	30.6635	23.5734	18.9379	40.6241	23.5658	32.1231	58.1872	32.2145	21.1319	39.0455	32.7408	31.384	12.1684
KU (P70/P80)	12.9839	20.7872	13.1071	9.58208	8.46668	14.7419	9.30107	12.1047	25.5091	12.0948	9.15932	16.289	14.0122	16.578	6.01547
La/SSB	12.248	18.1117	9.15117	7.64937	6.79386	13.5941	7.74616	10.2828	19.5245	10.3494	7.58868	13.147	11.2223	41.1179	4.70027
Laminin	6.35504	6.55836	4.8078	2.89399	3.64087	4.61589	4.30816	3.78418	8.84946	3.981	3.92043	4.69449	4.78116	5.49798	2.37371
LC1	13.44	18.1463	12.1429	8.19902	8.85284	15.568	10.5304	10.888	26.6396	11.041	9.80528	15.0237	13.8825	15.6287	5.9095
LPS	4.25455	2.55067	2.83425	1.57312	2.2985	2.5114	2.20257	2.20268	3.08086	2.05404	3.36817	2.32221	2.49068	2.95513	1.54257
M2	7.74549	7.19388	4.95735	2.94008	3.70017	5.87233	4.49963	4.41294	9.55659	4.34807	5.89436	5.07449	5.81999	6.83043	2.88686
MDA5	3.70419	4.25727	3.14382	1.50701	2.69904	3.30584	2.92337	2.42129	4.57478	2.45577	2.63779	1.99865	3.00038	3.03434	2.55845
Mi-2	3.87934	2.6569	2.86636	1.89685	1.90328	2.23953	2.21852	1.93023	3.86848	1.91989	2.32788	2.29344	2.26416	3.14531	1.54191
Mitochondrial antigen	4.79377	6.15615	4.59723	3.066	3.24716	4.64837	3.71461	3.57936	7.73742	3.75318	3.48847	4.035	4.37981	4.73925	2.22597
MPO	4.49127	4.88242	4.75499	2.87659	4.085	4.42412	5.0214	3.03436	6.51738	2.93493	3.63971	3.60042	3.70832	3.70958	2.66564
Muscarinic receptor	11.3215	15.0538	7.92447	7.5284	6.72513	14.5833	8.37599	9.25233	19.1176	9.68374	7.13694	12.7123	11.382	13.1378	4.97366
Myelin basic protein (MBP)	4.13293	2.88116	4.04049	2.2442	3.12095	2.63372	3.76799	2.02222	3.89787	1.81397	3.33276	2.32891	3.08475	2.62326	2.85869
Myosin	8.17793	10.692	7.97644	5.18211	5.73076	9.5763	5.64336	7.36791	15.0517	7.36097	6.584	9.64662	8.84543	10.7565	3.71433
Myosin heavy & light chain	1.80283	1.8356	1.31877	3.02661	1.12473	2.90444	1.26727	1.64881	1.15892	0.948569	1.249	1.001	1.08135	0.997757	1.001
Neuropilin-1	5.1289	8.00938	5.36967	3.93671	3.5865	6.93694	5.02371	4.8293	9.79186	4.37608	2.8352	5.30186	4.75282	5.19729	2.69646
Nucleolin	3.01499	2.11386	2.34487	1.55513	1.50421	1.98775	1.84179	1.68217	2.78563	1.62605	1.68515	1.8428	1.97539	2.11389	1.38938
Nucleosome antigen	1.48081	1.85989	2.89633	1.47788	1.97466	2.32989	2.81036	1.13303	3.03844	1.75419	2.57565	2.43532	1.71113	2.13353	1.25547
Nup 62	2.23416	1.30213	1.48064	1.20824	1.18083	1.41409	1.39186	1.17733	1.42043	1.20567	1.32897	1.34364	1.21014	1.56242	1.10064
PCNA	29.7186	44.7593	27.4925	23.6672	18.8464	38.8594	21.1154	29.2655	48.8849	25.3146	19.2795	33.4749	30.5109	35.5855	12.3664
Phosphatidyl-serine (PS)	26.2235	39.7616	28.0464	17.9231	15.3264	32.0576	18.9426	24.2385	46.1063	30.7554	19.6302	33.0748	31.4983	26.5231	10.8696
PL-7	14.0927	12.5082	15.6542	5.97486	9.56948	12.0662	11.7426	10.4372	29.9784	11.3821	11.2053	15.3213	14.9113	16.3698	7.35997
PL-12	7.40456	8.35803	6.80434	3.65948	4.42314	7.34034	5.28669	5.43821	13.2212	5.6901	5.18259	6.94723	7.53715	7.10555	3.39034
PM/Scl-75	4.58754	5.71356	3.72537	2.15537	2.23979	3.88855	2.71	2.92591	5.97836	3.5702	2.83237	4.38873	3.73204	5.63244	2.41421
PM/Scl 100	4.04878	3.75453	2.89758	1.9827	2.34901	2.64152	2.68359	2.27131	4.76403	2.24469	2.63179	2.54777	2.94234	2.80576	1.83252
PR3	2.15658	1.90845	1.98218	1.46359	1.44737	1.67843	1.62672	1.53156	2.5627	1.35747	1.55554	1.62301	1.59582	1.65441	1.3452
Proteoglycan	1.91396	1.47087	1.7265	1.25113	1.35116	1.46105	1.52032	1.38823	1.61102	1.30008	1.60778	1.48282	1.51723	1.55394	1.22546
Prothrombin protein	1.96973	2.9076	2.28255	1.91975	2.06772	2.64844	2.52468	2.03894	3.70317	1.78881	2.05884	2.12982	2.35693	2.11159	1.65554
Ribo Phosphoprotein P0	2.30033	2.43468	2.07494	1.72265	1.70252	2.08355	1.98981	1.72724	2.87073	1.63731	1.83275	1.93392	2.0077	2.15608	1.36073
Ribo Phosphoprotein P1	1.88662	1.801	2.04528	1.45771	1.62935	1.84296	1.46565	1.47279	1.6018	1.38995	1.48691	1.44772	1.61616	1.49878	1.29667
Ribo Phosphoprotein P2	1.57911	1.98667	1.60937	3.05123	1.28841	1.80898	1.34887	0.911975	1.97574	0.90271	1.31128	1.09087	1.41185	1.34764	1.16835
Ro/SSA (52 Kda)	3.48419	5.99211	3.82618	3.12753	1.90871	4.76083	3.23614	3.37996	9.62197	3.30741	3.49876	3.94112	4.54	4.07547	2.44213
Ro/SSA (60 Kda)	8.96385	15.1382	10.5709	7.4097	5.71846	12.6392	8.88054	9.25125	21.2183	9.49269	8.30568	10.7961	11.6188	10.9904	4.78241
S100	2.77634	1.71888	1.75248	1.2868	1.58704	1.51309	1.47329	1.35406	1.7534	1.28663	1.49934	1.54508	1.293	1.75239	1.15986
Scl-70/Topoisomerase I	5.48675	4.68815	6.00758	3.29078	3.48394	4.18213	4.54528	2.97073	7.51116	3.15227	4.54357	3.8236	4.30714	4.41381	2.67409
Sm	3.932	2.84084	4.18684	1.91517	2.60484	2.63505	3.09272	2.04963	4.36386	1.8272	3.28823	2.50774	3.14674	3.57422	2.77141
Sm/RNP	2.49338	1.56343	1.74156	1.27446	1.42202	1.53383	1.62774	1.34811	1.90137	1.29572	1.48907	1.51949	1.48597	1.76853	1.226
SmD	3.42399	2.10845	2.54289	1.44211	1.9391	2.0441	2.12802	1.69439	2.75018	1.56883	1.97081	1.84089	1.87147	2.48444	1.93247
SP100	2.51487	1.5801	2.07036	1.18724	1.58352	1.92202	1.85871	1.59217	2.48966	1.44686	1.98533	1.70807	1.99879	2.03039	1.33573
Sphingomyelin	1.673	1.13379	1.24212	1.001	1.05923	1.05864	1.13031	1.02244	1.24109	1.00717	1.13464	1.11583	1.08907	1.17811	1.001
SRP54	3.6199	4.55148	3.81864	2.69392	2.55475	4.00511	3.0557	3.34954	4.99224	3.26148	2.99037	3.71315	3.31301	4.0213	2.05734
ssDNA	38.686	5.09584	7.02888	3.69515	2.48965	3.89717	3.12115	4.1944	6.44396	2.98888	14.7624	7.45415	3.46417	17.2006	2.11075
ssRNA	3.32504	1.37606	1.64529	1.48952	1.17067	1.12126	1.20159	1.12227	1.24444	1.02846	1.35207	1.16499	1.09805	2.04925	1.001
TGF-B1	2.1405	1.62977	1.81839	1.434	1.50591	1.57107	1.661	1.40197	1.87126	1.31687	1.55267	1.59216	1.97209	1.62445	1.45379
Thyroglobulin	1.86448	2.52406	2.081	1.50759	2.05422	2.40967	2.08792	1.97556	3.26741	1.63525	1.79292	2.1631	2.18572	1.88089	1.44919
TIF1 gama	5.64502	5.9548	3.74766	2.01927	3.92656	4.34024	4.37275	2.48045	4.59555	4.07482	2.1344	1.16985	4.11265	4.4814	3.35729
TNF-a	9.29359	11.9897	9.56969	6.29374	7.30117	11.0683	8.17104	8.61801	20.3519	8.80942	7.0925	10.8536	11.1278	10.0078	4.09048
TPO	4.04297	4.182	3.3124	3.01814	2.3909	2.95181	3.33961	2.38263	6.53876	2.72179	3.19329	3.28617	3.88271	3.75363	2.12134
Troponin-I	1.6614	2.16707	1.46482	1.67573	1.48346	1.95712	1.59604	1.52588	2.52263	1.29782	1.82325	1.87661	1.66313	2.14194	1.35478
TTG	21.6298	40.6742	25.2654	15.437	17.2493	31.3436	20.1354	21.9894	52.0495	22.1505	17.557	29.2208	27.1346	26.5883	10.9255
TWEAK	3.56135	2.08023	2.56497	1.70378	1.96676	2.18054	2.22215	1.81627	2.96304	1.77633	2.24852	2.05085	2.20897	2.11582	1.49365
U1-snRNP 68/70	3.36553	4.3848	4.52209	3.26141	4.44255	4.11075	4.46407	3.16262	5.80888	2.42961	4.07372	3.49818	4.2886	3.55165	3.68949
U1-snRNP A	8.41978	6.63614	9.61027	4.46664	10.1801	5.86244	9.00515	4.98736	12.2601	3.40908	8.88497	5.88657	8.75238	9.67354	7.11245
U1-snRNP B/B'	2.0371	1.55783	2.25155	1.05093	1.64125	1.23929	1.72341	1.17512	1.83348	1.06353	1.61392	1.46692	1.53416	1.43199	1.36084
U1-snRNP C	3.19858	3.1985	3.36197	2.25274	2.69593	2.88736	2.81089	2.30182	4.0698	1.98378	2.4861	2.543	2.61981	2.73767	2.08767
Vimentin	3.03606	2.4201	2.30404	1.28871	1.91806	2.12767	2.29061	1.83207	3.24857	1.75421	2.59479	2.15791	2.17392	2.77426	1.59212
Vitronectin	2.61195	2.58853	2.64858	1.59812	2.29487	2.0078	2.57322	1.83105	3.85156	1.87174	2.07546	2.28578	2.58344	2.50215	2.01494
anti-Ig control 1	92.123	174.815	136.82	157.522	134.272	166.228	160.019	158.739	204.807	123.552	112.908	209.958	162.78	175.58	108.293
anti-Ig control 2	45.2839	84.4952	80.4323	42.0522	79.9401	23.6234	91.1926	34.154	103.441	36.5078	68.2728	51.3631	96.7818	49.4867	63.7364
anti-Ig control 3	24.2899	28.6421	36.1808	31.0199	39.0829	30.9505	43.7206	26.4755	55.0086	23.9825	30.8145	34.5329	37.1802	32.7038	29.2647
anti-Ig control 4	8.55852	13.0552	11.8711	9.50773	8.91102	11.5538	13.5005	9.66905	16.5978	7.5028	7.6677	12.0276	12.8647	11.7933	9.95799
Ig control 1	199.365	448.487	311.574	156.74	374.177	489.503	349.885	520.644	405.438	277.367	418.672	462.081	379.656	397.54	534.511
Ig control 2	192.211	368.961	260.157	504.145	384.865	461.514	393.344	473.924	383.396	262.717	393.725	421.486	406.749	314.923	499.101
Ig control 3	148.96	201.814	317.686	329.787	379.96	288.902	345.805	287.907	342.696	227.051	310.258	277.968	285.326	286.524	374.002
Ig control 4	102.57	136.257	153.815	200.794	204.664	137.488	222.486	166.075	200.52	114.679	177.864	154.817	165.238	138.671	191.241

## Sheet: IgM_SBR-nor
ID	S2	S3	S4	S5	L1	L2	L3	A1	A2	A3	A4	C1	C2	C3	C4
Aggrecan	5.75531	1.8074	1.64245	1.83362	1.16585	2.10072	1.19655	1.70742	3.0722	3.34394	1.26171	1.6802	2.13015	2.18813	1.13187
AGTR	5.35119	2.42425	2.37602	1.55978	1.57786	2.00504	1.81528	1.68617	2.0865	2.35111	2.50114	1.94356	1.80961	2.30993	1.17057
Alpha-actinine	3.05514	1.24232	1.61725	1.09061	1.08753	0.991137	1.13178	0.920157	1.10047	1.42479	1.19322	1.11968	1.11671	1.45311	0.831874
Alpha Fodrin	8.51793	5.72732	4.53485	3.47791	2.70509	4.54844	3.89602	2.84592	6.1749	5.41995	4.82979	4.36356	4.33386	6.27307	1.78335
Amyloid	3.18684	1.19324	1.52528	1.05088	0.99467	0.928309	1.13343	0.888357	0.951967	1.42139	1.05331	1.02776	1.01892	1.34969	0.810936
AQP4	24.8638	18.702	12.4884	8.91356	6.22545	15.7388	8.86972	11.2547	16.1833	16.2977	6.71714	15.7314	9.73184	18.5494	3.52045
B2-microglobulin	4.83097	2.60955	3.10731	1.73538	1.49807	1.82177	1.78801	1.40807	2.97442	2.54152	1.86859	1.89581	2.24205	2.14648	0.971706
B2 glycoprotein 1	11.6526	9.9918	7.15343	6.09213	4.10055	8.40794	5.93077	4.98785	10.039	8.92402	4.79601	7.87176	6.25787	8.55345	2.34009
B-actin	36.5076	38.3794	22.131	16.5342	12.7425	24.8988	14.9213	16.6975	37.2822	30.5847	12.607	24.9555	22.6776	28.5691	6.61126
BPI	7.89315	5.99236	5.20466	3.42501	2.88908	4.79171	3.35648	3.67917	8.45914	5.49789	3.85524	4.86695	4.826	6.07862	1.73601
Calprotectin	34.8679	33.1021	21.051	13.8634	10.8026	21.2702	11.9825	12.8184	31.492	25.011	13.4216	18.7166	19.5874	21.8647	5.825
Cardolipin	6.26001	3.72948	3.318	2.78226	1.77462	2.50493	2.83662	2.24226	2.84314	4.69404	2.12661	2.50998	2.50879	2.97465	1.0743
CD4	13.0818	12.3695	9.7564	5.11778	4.88496	8.13824	5.60919	5.68855	14.664	10.6294	5.78386	8.54549	7.62305	8.90799	2.51247
CD8	12.8374	10.8014	8.91331	5.69137	4.55213	8.75876	7.6598	5.12765	14.1363	8.50433	5.90992	8.17871	7.78809	9.52113	2.56514
CENP-A	6.48252	4.13932	3.77218	2.18984	1.91067	2.56898	2.23301	1.75251	2.48396	2.947	1.19936	2.44381	1.94993	3.52437	1.1021
CENP-B	24.2675	16.6683	9.91046	7.82613	5.34918	11.0807	7.81214	6.97258	15.2066	11.4644	6.71773	10.3711	8.34865	12.8001	3.38527
Chondroitin Sulfate	3.79642	1.65453	1.65196	1.19312	1.0884	1.12052	1.2524	0.976521	1.33708	1.59634	1.24545	1.21873	1.20674	1.77545	0.832504
COL17A1	2.56225	1.70015	1.89309	1.001	1.41287	1.001	1.51948	0.88784	1.75528	1.001	1.44733	1.001	1.66106	2.56452	1.12576
Collagen I	3.20396	1.33638	1.63729	1.13828	1.10002	1.07135	1.25754	0.962234	1.20473	1.56032	1.16787	1.12605	1.16234	1.41457	0.850015
Collagen II	3.16106	1.4128	1.72137	1.13307	1.08876	1.10497	1.29887	0.939629	1.21929	1.45314	1.19524	1.10749	1.22867	1.38546	0.839416
Collagen III	4.18214	1.52503	1.83438	1.11608	1.17062	1.07877	1.37859	0.949564	1.13839	1.55478	1.2514	1.15111	1.14644	1.72688	0.807383
Collagen IV	4.45472	2.58001	2.42187	1.74786	1.65078	1.98416	2.00878	1.5077	2.21126	2.43379	1.51848	1.92603	1.77135	2.42919	1.0311
Collagen V	3.58616	2.18458	2.40356	1.732	1.72227	1.7938	2.00208	1.2194	2.36442	2.35047	1.61503	1.98307	1.79293	2.16579	1.04499
Collagen VI	51.2253	9.03631	11.7215	6.05698	3.89111	6.74154	5.02922	5.73344	9.95036	8.19091	14.4845	9.20283	6.04771	18.5882	2.19438
complement C1q	17.3834	17.3715	12.168	8.86717	7.02837	14.0469	8.85769	8.46989	19.4867	14.5099	7.10639	13.3712	11.899	15.1255	3.87124
complement C3/C3a	13.7713	8.12684	10.5703	1.81112	8.4107	2.53452	10.3981	3.98664	20.5591	2.98038	7.87146	2.53736	9.38473	5.61768	4.20645
Core Histone	12.8468	3.46885	5.40852	2.01487	4.48955	2.2585	3.01184	2.40959	4.00397	3.05073	4.84661	2.85717	2.70869	6.15941	1.50663
CRP	92.7061	78.6516	60.4334	45.0478	33.8916	67.0031	33.4537	43.7102	86.7446	62.8288	38.3903	54.1314	58.8781	58.3715	18.0332
dsDNA	10.5357	5.70087	5.44649	2.86898	2.78266	3.44563	3.52856	2.68722	7.09665	5.02157	3.22059	3.606	4.17095	5.65158	1.63874
EBNA1	26.5356	23.9353	16.4191	8.9991	8.86281	13.8454	10.4934	8.918	20.3141	18.1009	8.04841	13.5443	11.54	15.0951	4.27262
Elastin	7.90645	4.49371	3.85128	2.6719	2.35628	3.39169	2.8086	2.41249	4.6064	3.87984	2.87557	3.28835	3.20674	4.2471	1.42
Factor B	24.3414	19.622	17.2322	8.93178	7.68906	15.4308	10.9964	10.5203	27.3926	17.3628	10.3593	14.8672	15.4728	16.7802	4.33234
Factor D	5.07603	1.60797	2.09754	1.27988	1.27472	1.41501	1.50606	1.18964	1.47889	2.02382	1.46596	1.5267	1.31832	2.26011	0.875037
Factor H	13.5308	11.4252	8.34513	5.5822	5.27421	8.84062	7.74776	5.52109	14.1057	9.80795	5.802	8.46328	7.23623	9.71185	2.81031
Factor I	16.7481	14.1846	11.1095	7.35827	6.044	11.2785	8.14509	7.17147	19.4097	13.5412	7.03416	11.393	9.63266	13.1738	3.77789
Factor P	5.69416	2.17859	2.3167	1.62037	1.56851	1.83503	1.89714	1.5694	2.4002	2.40869	1.75441	1.75912	1.82899	2.40614	1.09277
Fibrinogen IV	11.5171	5.99224	5.8704	2.99894	3.29078	4.36305	3.93604	3.22904	7.36623	5.46612	3.70478	4.49379	4.3572	5.72593	1.9551
Fibrinogen S	11.43	6.43339	5.62783	3.36165	3.33494	4.65226	4.03594	3.44308	7.37595	6.04251	3.64449	4.90817	4.37262	5.80668	1.91578
Fibronectin	12.2443	10.5521	7.65575	5.13118	4.4891	7.10757	5.62545	5.28199	11.8286	8.51155	4.85769	7.15248	6.85616	8.56156	2.53084
GAD65/GAD2	10.1496	10.9295	7.26425	5.29365	3.70025	6.86926	4.40218	4.81827	9.58213	8.12098	4.04051	6.89123	6.12776	8.03603	2.5058
GBM	5.91784	3.30562	2.23519	1.17354	1.44797	2.83767	1.69949	1.52443	1.93367	3.7631	2.00378	2.69511	2.61719	3.64044	1.2909
GDF-15	4.15552	1.39572	1.6649	1.13428	1.11882	1.16589	1.25661	1.08879	1.13518	1.59223	1.38806	1.19656	1.093	1.60976	0.826197
GM-CSF	13.9589	10.6253	8.62214	4.84319	4.70162	7.82017	6.07517	5.20574	13.4357	8.19099	5.39979	7.08905	6.99345	7.8237	2.59353
GP2	20.7136	15.1308	13.7178	7.42788	7.65097	13.6889	9.22084	8.26899	22.7075	15.0065	8.07098	13.885	12.3762	16.0313	4.04197
GP210	5.00913	3.25553	3.80992	1.36232	2.8297	2.36119	3.04991	1.58941	3.13631	2.47792	2.01535	2.20195	2.16576	3.64912	1.2654
Hemocyanin	65.2731	60.885	53.1831	28.4771	24.4944	43.2949	27.9398	32.4969	69.5549	62.4282	29.5426	46.8624	47.4497	50.2858	13.4374
Heparan Sulphate	3.7713	1.39792	1.75062	1.11959	1.11061	1.02931	1.26908	0.954914	1.17303	1.54889	1.23401	1.18301	1.10129	1.51598	0.809942
Heparin	6.10427	2.90174	2.24831	1.58546	1.46437	1.69809	1.71293	1.38645	2.29622	2.33	2.42202	2.182	1.70522	2.36453	1.04818
Histone H1	2.25456	1.73019	3.74803	1.10231	1.65509	1.31195	2.82784	1.001	2.91157	1.54201	1.72341	1.52618	1.32109	1.66385	1.14455
Histone H2A	6.56468	2.02364	3.3419	1.56998	2.08679	1.47084	2.0542	1.19016	2.31007	1.8595	2.26832	1.62009	1.58186	4.29703	1.16806
Histone H2B	6.95301	2.82973	4.18755	2.13283	2.4841	1.99869	2.68545	1.57619	3.08117	2.35033	2.54854	2.2224	2.35727	4.40716	1.52869
Histone H3	5.12228	1.9446	3.2628	1.45129	1.8644	1.50449	1.97171	1.16864	2.14892	1.97657	1.89941	1.64757	1.66955	2.23084	1.0905
Histone H4	4.25758	1.33523	1.84416	1.15196	1.15519	1.14278	1.31749	0.994141	1.25386	1.6359	1.24154	1.22137	1.19664	1.52365	0.823163
IA2	12.3036	7.45335	8.20458	4.11741	4.15044	5.80399	5.56365	4.47068	11.2668	7.8418	4.99182	6.28866	6.86889	8.18508	2.57978
IFN-A1	15.9597	12.9881	10.7082	5.99655	5.3082	7.12936	7.24213	5.88623	15.6639	10.0403	6.80671	7.35861	10.3589	9.25079	3.21875
IFN-B	3.68425	1.98308	2.32044	1.45935	1.41201	1.54329	1.57763	1.27627	2.07049	2.0174	1.43272	1.53781	1.65279	1.94755	0.993785
IFN-E	3.25541	1.81036	1.9577	1.41875	1.34428	1.69069	1.33508	1.30621	1.70125	2.03405	1.36777	1.55074	1.48881	1.94083	0.922737
IFN-L2	6.25612	3.05242	2.90104	1.76426	1.76117	2.32255	2.0638	1.78595	3.17072	2.67869	1.9229	2.24067	2.19804	2.71355	1.18638
IFN-r	5.46406	1.64237	2.11001	1.16955	1.3238	1.23785	1.51342	1.05859	1.48913	1.80008	1.37561	1.34263	1.23128	1.84969	0.879027
IL-12	19.5591	16.586	13.459	5.81535	6.27485	10.1062	7.94348	7.03233	21.6566	12.4138	7.79008	9.79892	12.0696	11.9155	3.97251
IL-15	30.2784	25.7054	19.4368	10.5069	8.78378	16.0148	8.85107	12.361	16.8809	21.2305	6.51437	17.4155	9.81745	16.7571	4.97583
Insulin	12.5453	10.8285	9.44535	6.40772	3.86085	9.5491	4.80952	7.25936	10.6208	12.3924	5.55797	10.7391	8.56229	10.6695	3.24412
Intrinsic Factor (IF)	3.35132	1.3988	1.61161	1.19295	1.18279	1.1543	1.30733	1.0239	1.3636	1.57677	1.26429	1.21225	1.30293	1.51965	0.879487
Jo-1	47.538	54.5054	36.078	23.7606	17.3537	36.2012	22.2669	27.2198	53.6178	44.8411	19.9446	36.4083	32.4888	33.8609	9.39876
KU (P70/P80)	21.6493	22.0811	15.4215	9.65819	7.75843	13.1369	8.78842	10.257	23.5059	16.8354	8.64467	15.1889	13.9043	17.8864	4.6463
La/SSB	20.4223	19.2391	10.7671	7.71013	6.22555	12.1141	7.31921	8.71327	17.9913	14.4059	7.16228	12.259	11.1359	44.363	3.63045
Laminin	10.5964	6.9666	5.65676	2.91697	3.3363	4.11335	4.07071	3.20657	8.15452	5.54136	3.70015	4.37742	4.74435	5.93189	1.83343
LC1	22.4098	19.2758	14.2871	8.26414	8.11228	13.8731	9.95002	9.22606	24.5476	15.3686	9.25433	14.009	13.7756	16.8621	4.56445
LPS	7.09404	2.70944	3.33472	1.58561	2.10623	2.23798	2.08117	1.86646	2.83892	2.85914	3.17892	2.16536	2.4715	3.18836	1.19146
M2	12.9148	7.64167	5.83271	2.96343	3.39065	5.23299	4.25162	3.73935	8.80612	6.05232	5.56316	4.73175	5.77519	7.3695	2.22978
MDA5	6.17636	4.52227	3.69894	1.51898	2.47326	2.94593	2.76224	2.05171	4.21553	3.41832	2.48958	1.86366	2.97728	3.27381	1.97613
Mi-2	6.46841	2.82228	3.3725	1.91192	1.74407	1.9957	2.09624	1.6356	3.56469	2.6724	2.19708	2.13854	2.24673	3.39354	1.19096
Mitochondrial antigen	7.99314	6.53934	5.409	3.09036	2.97553	4.14229	3.50987	3.03301	7.12981	5.22426	3.29246	3.76247	4.34609	5.11328	1.71932
MPO	7.48875	5.18633	5.59462	2.89943	3.74329	3.94246	4.74463	2.5712	6.00558	4.08529	3.4352	3.35725	3.67977	4.00234	2.05892
Muscarinic receptor	18.8775	15.9908	9.32375	7.5882	6.16257	12.9956	7.91433	7.84006	17.6163	13.4793	6.73592	11.8537	11.2944	14.1747	3.84161
Myelin basic protein (MBP)	6.89125	3.06051	4.75396	2.26202	2.85988	2.34698	3.56031	1.71355	3.59177	2.52497	3.14549	2.17162	3.061	2.83029	2.20803
Myosin	13.6359	11.3575	9.3849	5.22327	5.25138	8.5337	5.33231	6.24328	13.8697	10.2461	6.21406	8.99508	8.77733	11.6054	2.86892
Myosin heavy & light chain	3.00604	1.94986	1.55163	3.05065	1.03064	2.58822	1.19742	1.39714	1.06791	1.32036	1.17882	1.001	1.07303	1.0765	1.001
Neuropilin-1	8.55192	8.50793	6.31784	3.96798	3.28648	6.1817	4.74682	4.09216	9.02291	6.0913	2.67589	4.94377	4.71623	5.60747	2.08272
Nucleolin	5.02719	2.24544	2.75892	1.56749	1.37838	1.77134	1.74028	1.42541	2.56688	2.26339	1.59046	1.71834	1.96018	2.28072	1.07315
Nucleosome antigen	2.4691	1.97566	3.40776	1.48962	1.80947	2.07623	2.65546	0.960089	2.79984	2.44175	2.43093	2.27084	1.69795	2.30192	0.969715
Nup 62	3.72524	1.38319	1.74209	1.21784	1.08205	1.26014	1.31515	0.997622	1.30889	1.67824	1.25429	1.25289	1.20082	1.68573	0.850125
PCNA	49.5529	47.5454	32.3471	23.8552	17.2699	34.6287	19.9516	24.7984	45.046	35.2367	18.1962	31.2139	30.276	38.3939	9.55167
Phosphatidyl-serine (PS)	43.7251	42.2366	32.9988	18.0655	14.0443	28.5674	17.8985	20.5388	42.4856	42.8101	18.5272	30.8409	31.2558	28.6163	8.39555
PL-7	23.4981	13.2868	18.4184	6.02232	8.76897	10.7525	11.0954	8.84404	27.6242	15.8433	10.5756	14.2865	14.7965	17.6617	5.68477
PL-12	12.3464	8.87828	8.00583	3.68854	4.05314	6.54117	4.9953	4.60813	12.183	7.92036	4.89139	6.47801	7.47912	7.66634	2.61867
PM/Scl-75	7.64926	6.0692	4.38319	2.17249	2.05242	3.46519	2.56063	2.4793	5.50888	4.96956	2.67322	4.09232	3.7033	6.07697	1.86472
PM/Scl 100	6.75093	3.98824	3.40923	1.99845	2.15251	2.35393	2.53568	1.92462	4.38992	3.12451	2.48392	2.37569	2.91969	3.02719	1.41542
PR3	3.59588	2.02725	2.33219	1.47521	1.3263	1.4957	1.53706	1.29779	2.36146	1.88954	1.46814	1.5134	1.58353	1.78497	1.03902
Proteoglycan	3.19134	1.56243	2.03136	1.26107	1.23814	1.30198	1.43653	1.17633	1.48451	1.80965	1.51744	1.38267	1.50555	1.67658	0.946535
Prothrombin protein	3.28433	3.08858	2.68559	1.935	1.89475	2.3601	2.38553	1.72772	3.41237	2.48994	1.94316	1.98597	2.33878	2.27824	1.27872
Ribo Phosphoprotein P0	3.83558	2.58623	2.44133	1.73633	1.5601	1.85671	1.88014	1.46359	2.6453	2.27906	1.72977	1.8033	1.99224	2.32624	1.05101
Ribo Phosphoprotein P1	3.14576	1.91311	2.40643	1.46929	1.49305	1.64231	1.38487	1.24798	1.47602	1.93474	1.40336	1.34994	1.60372	1.61706	1.00154
Ribo Phosphoprotein P2	2.633	2.11034	1.89355	3.07547	1.18063	1.61203	1.27452	0.772772	1.82059	1.25653	1.2376	1.01719	1.40098	1.454	0.902419
Ro/SSA (52 Kda)	5.80955	6.36509	4.5018	3.15237	1.74904	4.2425	3.05777	2.86405	8.86637	4.60377	3.30217	3.67494	4.50505	4.39712	1.88628
Ro/SSA (60 Kda)	14.9463	16.0805	12.4375	7.46855	5.2401	11.2632	8.39107	7.83915	19.552	13.2134	7.839	10.0669	11.5293	11.8577	3.69389
S100	4.62928	1.82588	2.06193	1.29702	1.45429	1.34836	1.39209	1.14738	1.61571	1.79093	1.41509	1.44072	1.28304	1.8907	0.895868
Scl-70/Topoisomerase I	9.14861	4.97997	7.06838	3.31691	3.1925	3.72681	4.29476	2.51728	6.92131	4.38782	4.28827	3.56535	4.27397	4.76215	2.06544
Sm	6.55622	3.01767	4.92615	1.93038	2.38694	2.34816	2.92226	1.73678	4.02117	2.54338	3.10346	2.33836	3.12251	3.8563	2.14061
Sm/RNP	4.15747	1.66075	2.04909	1.28458	1.30307	1.36684	1.53802	1.14234	1.75206	1.80359	1.4054	1.41686	1.47453	1.9081	0.946954
SmD	5.70916	2.23969	2.99191	1.45356	1.77689	1.82155	2.01073	1.43576	2.53421	2.18375	1.86007	1.71655	1.85706	2.68052	1.49263
SP100	4.19329	1.67846	2.43594	1.19667	1.45106	1.71276	1.75626	1.34914	2.29415	2.01396	1.87378	1.59271	1.9834	2.19064	1.03171
Sphingomyelin	2.78956	1.20436	1.46146	1.001	0.970622	0.943382	1.06801	0.866377	1.14363	1.40194	1.07089	1.04047	1.08068	1.27109	1.001
SRP54	6.03582	4.83479	4.49293	2.71531	2.34104	3.56907	2.88728	2.83827	4.6002	4.53983	2.82235	3.46236	3.2875	4.33867	1.58907
ssDNA	64.505	5.41303	8.27002	3.7245	2.28139	3.47287	2.94912	3.55417	5.93792	4.16038	13.9329	6.95069	3.4375	18.5581	1.63032
ssRNA	5.54417	1.46171	1.93581	1.50135	1.07274	0.99919	1.13537	0.950972	1.14671	1.43157	1.2761	1.08631	1.0896	2.21098	1.001
TGF-B1	3.56908	1.73122	2.13948	1.44539	1.37993	1.40002	1.56945	1.18798	1.72431	1.83302	1.46543	1.48462	1.9569	1.75265	1.12289
Thyroglobulin	3.10883	2.68118	2.44845	1.51956	1.88238	2.14732	1.97284	1.67401	3.01082	2.2762	1.69218	2.017	2.1689	2.02934	1.11934
TIF1 gama	9.41251	6.32546	4.40941	2.03531	3.5981	3.86771	4.13174	2.10184	4.23466	5.67196	2.01447	1.09084	4.08099	4.83508	2.59314
TNF-a	15.4961	12.736	11.2595	6.34373	6.69042	9.86327	7.72067	7.30257	18.7537	12.2623	6.69399	10.1206	11.0421	10.7976	3.15945
TPO	6.74125	4.44232	3.8973	3.04211	2.1909	2.63043	3.15554	2.01895	6.02527	3.7886	3.01386	3.06422	3.85282	4.04987	1.63851
Troponin-I	2.77022	2.30196	1.72347	1.68904	1.35936	1.74405	1.50807	1.29297	2.32453	1.8065	1.72081	1.74987	1.65033	2.31098	1.04642
TTG	36.0655	43.206	29.7267	15.5596	15.8063	27.9312	19.0256	18.633	47.9621	30.8324	16.5705	27.2472	26.9257	28.6867	8.43879
TWEAK	5.9382	2.20972	3.01789	1.71732	1.80224	1.94314	2.09967	1.53904	2.73036	2.47257	2.12218	1.91234	2.19196	2.2828	1.15368
U1-snRNP 68/70	5.61169	4.65774	5.32059	3.28732	4.07093	3.6632	4.21802	2.67988	5.35271	3.38191	3.84482	3.26191	4.25558	3.83195	2.84973
U1-snRNP A	14.0392	7.04922	11.3072	4.50212	9.32852	5.22418	8.50881	4.22609	11.2973	4.74529	8.38574	5.48898	8.68499	10.437	5.49359
U1-snRNP B/B'	3.39666	1.65479	2.64913	1.05928	1.50396	1.10436	1.62842	0.99575	1.68949	1.48039	1.52324	1.36784	1.52235	1.545	1.0511
U1-snRNP C	5.33332	3.39759	3.95562	2.27063	2.47041	2.57301	2.65596	1.95047	3.75021	2.76133	2.34641	2.37124	2.59964	2.95374	1.6125
Vimentin	5.06233	2.57074	2.71088	1.29895	1.75761	1.89602	2.16436	1.55242	2.99346	2.44178	2.449	2.01216	2.15718	2.99321	1.22974
Vitronectin	4.35517	2.74966	3.11626	1.61082	2.1029	1.7892	2.43139	1.55156	3.5491	2.60538	1.95884	2.1314	2.56355	2.69963	1.55632
anti-Ig control 1	153.606	185.697	160.979	158.773	123.04	148.131	151.2	134.509	188.724	171.978	106.564	195.777	161.527	189.437	83.6443
anti-Ig control 2	75.5064	89.7547	94.6348	42.3862	73.253	21.0515	86.1663	28.9407	95.3181	50.8171	64.4367	47.894	96.0366	53.3923	49.2294
anti-Ig control 3	40.501	30.425	42.5695	31.2663	35.8136	27.5808	41.3108	22.4343	50.6889	33.3825	29.0831	32.2006	36.8939	35.2849	22.6038
anti-Ig control 4	14.2705	13.8678	13.9673	9.58325	8.1656	10.2959	12.7564	8.19318	15.2944	10.4436	7.23686	11.2152	12.7656	12.724	7.69147
Ig control 1	332.422	476.403	366.591	157.985	342.877	436.21	330.6	441.173	373.599	386.082	395.148	430.872	376.733	428.915	412.852
Ig control 2	320.493	391.927	306.095	508.15	352.67	411.268	371.664	401.585	353.288	365.69	371.602	393.019	403.617	339.778	385.502
Ig control 3	248.377	214.376	373.782	332.406	348.176	257.448	326.745	243.961	315.784	316.044	292.825	259.194	283.129	309.137	288.876
Ig control 4	171.025	144.739	180.976	202.388	187.544	122.519	210.223	140.725	184.773	159.628	167.87	144.361	163.966	149.615	147.713

## Sheet: IgM_SNR
ID	S2	S3	S4	S5	L1	L2	L3	A1	A2	A3	A4	C1	C2	C3	C4	SNR%>=threshld
Aggrecan	3.5345	4.3255	4.8075	7.1555	5.9155	9.57	5.575	11.741	25.24	15.3015	4.245	9.141	11.8245	5.019	5.844	100
AGTR	12.046	12.2955	12.5845	8.48	9.5	15.139	12.5665	12.3235	14.869	10.0195	11.769	13.343	10.898	11.6985	7.3925	100
Alpha-actinine	7.2275	3.593	5.8575	2.727	3.974	0.668	4.2695	2.6665	4.385	2.001	4.9315	4.125	3.375	4.64	2.583	66.6667
Alpha Fodrin	30.7675	50.742	30.771	30.8165	22.206	49.893	30.126	30.2335	48.9085	39.678	46.75	37.389	35.931	49.5715	15.8175	100
Amyloid	8.067	3.231	4.9665	2.208	2.8845	2.231	4.3465	2.2085	2.25	1.93	3.1285	2.8075	2.2405	4.1455	1.3805	40
AQP4	170.017	270.623	187.059	154.595	120.599	322.893	186.731	237.372	327.094	216.409	114.262	185.546	190.776	263.675	43.9685	100
B2-microglobulin	12.697	15.541	21.1075	8.7835	10.7625	12.2145	13.349	9.3625	28.702	10.096	11.3605	11.571	17.8465	10.878	3.6975	100
B2 glycoprotein 1	51.4075	98.486	80.0835	78.2665	59.167	114.493	83.51	73.552	154.81	78.531	42.4385	80.831	72.0295	81.6775	33.7745	100
B-actin	172.378	404.094	199.725	176.935	165.554	316.557	193.786	232.401	536.322	259.572	145.629	325.212	290.154	278.149	106.25	100
BPI	27.0075	42.0585	63.661	35.4835	52.131	44.592	41.0425	39.0155	71.669	46.786	39.9285	41.007	68.1975	8.458	33.5605	100
Calprotectin	188.256	427.875	192.952	199.615	129.158	185.262	104.865	78.9855	153.795	161.284	154.256	119.522	194.195	154.797	88.1	100
Cardolipin	27.4415	50.624	28.116	99.6345	20.3665	32.25	38.991	33	19.003	109.619	26.5	30.8845	24.397	28.6075	10.122	100
CD4	72.159	183.153	117.744	76.75	88.093	155.571	96.3955	101.25	254.584	128.546	94.252	137.264	124.731	108.214	43.769	100
CD8	57.463	127.285	92.737	36.212	62.317	114.278	109.39	76.9165	207.681	75.5065	82.923	100.463	96.453	101.225	37.9845	100
CENP-A	24.777	41.736	32.9245	12.3705	25.853	28.52	26.975	18.574	26.1	20.353	10.924	24.159	15.741	30.8855	14.4045	100
CENP-B	107.403	239.464	135.198	114.972	106.805	178.334	131.802	120.434	284.074	125.76	93.992	172.615	131.805	141.757	65.731	100
Chondroitin Sulfate	6.313	6.1425	4.2275	2.801	3.306	3.157	4.3845	2.9345	5.2645	3.315	4	3.731	3.5	4.1595	2.1255	80
COL17A1	1.771	0.5915	1.904	0.001	2.393	0.001	2.4195	0.4115	2.3265	0.001	2.2555	0.001	2.662	1.008	2.1865	0
Collagen I	3.441	4.7735	5.5625	3.45	4.107	3.944	4.979	3.459	4.964	3.265	4.3	4.033	3.751	4.8945	3.25	100
Collagen II	7.037	7.044	4.213	3.5395	3.5215	5.0335	4.2335	2.677	2.35	1.9045	3.981	2.298	2.5285	3.4145	3.4915	66.6667
Collagen III	10.955	6.625	7.348	3.0835	5.1415	4	6.7265	3.0385	4.3305	3.201	5.5685	4.343	3.7725	7.876	2.2085	93.3333
Collagen IV	11.575	18.8925	13.3025	10.6155	12.699	16.0825	14.365	10.464	19.8215	11.4775	8.8575	13.0715	11.6845	13.875	6.534	100
Collagen V	11.332	13.3085	8.5015	7.977	14.9285	10.9255	17.263	7.9425	18.581	12.1035	9.0835	14.367	9.686	7.5235	7.4505	100
Collagen VI	241.094	122.695	131.531	85.6825	64.7085	109.728	78.077	78.5275	164.464	88.214	166.028	139.478	92.5	232.037	35.4925	100
complement C1q	108.068	368.603	109.493	185.333	167.671	273.007	231.321	222.571	527.465	234.12	172.679	300.354	246.761	128.156	110.577	100
complement C3/C3a	26.9035	20.165	21.7385	0.328	38	0.4245	44.504	23.225	65.303	0.3905	30.023	0.423	41.0135	3.6745	33.347	73.3333
Core Histone	56.9225	21.276	59.5715	15.0865	67.9325	27.033	42.2305	29.043	62.5385	26.069	45.2645	22.685	33.7695	54.7035	20.4165	100
CRP	470.569	663.85	586.178	622.865	489.055	1055.3	472.782	879.875	753.341	708.938	413.125	649.394	638.811	712.001	442.131	100
dsDNA	29.5595	60.7815	44.083	26.08	27.548	40.865	33.807	31.748	81.447	36.383	33.6975	36.059	44.107	42.815	16.423	100
EBNA1	117.713	259.092	128.702	111.595	131.857	170.666	138.972	131.457	288.235	152.508	49.82	157.879	141.698	123.121	63.893	100
Elastin	26.8315	42.8035	26.0035	24	25.8105	38.154	29.2285	25.0765	60.522	26.7645	28.75	34.085	29.5445	30.409	14.5415	100
Factor B	97.757	279.198	217.174	133.964	136	260.884	177.444	187.786	495.53	214.536	90.271	212.82	262.038	196.81	81.503	100
Factor D	11.1575	8.3335	8.0795	4.554	6.5835	6.832	9.857	6.0335	10.107	6.6125	7.094	6.832	4.706	7.107	3.457	100
Factor H	60.9535	175.571	101.784	89.3105	83.651	157.049	119.835	99.1925	242.395	98.9165	81.2725	133.679	114.924	70.837	49.3335	100
Factor I	72.0865	150.328	107.945	92.505	89.6665	174.677	117.192	117.423	313.115	139.262	79.0385	156.431	142.577	107.54	62.9205	100
Factor P	18.9785	14.047	11.688	9.3215	5.9755	15.367	15.1785	12.0335	22.8215	12.0405	6.899	13.2355	13.1155	16.206	6.4235	100
Fibrinogen IV	18.367	53.5335	22.917	24.068	41.042	41.619	42.433	29.8825	84.4065	32.918	34.994	37.497	37.1315	37.0605	18.0215	100
Fibrinogen S	42.414	53.34	31.1325	32.9845	38.1425	50.3715	47.1415	43.7255	78.212	38.604	35.766	59.5715	49.7525	50.3485	22.7915	100
Fibronectin	28.4435	109.831	75.147	59.0765	60.702	89	75.545	71.718	158.82	81.586	57.9335	88.5105	84.2335	69.2115	35.3335	100
GAD65/GAD2	43.4325	129.948	75.848	66.5385	50.1925	102.322	56.3265	75.4165	133.434	80.7435	18.2795	92.4335	76.351	75.9755	0.771	93.3333
GBM	11.128	27.564	14.204	12.093	14.9	19.5625	20.0625	14.225	33.2645	19.788	3.8305	15.7685	17.3535	17.6965	8.875	100
GDF-15	8.2555	3.738	5.0275	2.5385	3.8335	3.8175	4.9915	3.905	3.7415	2.717	6.2125	3.71	2.231	3.2785	1.6595	73.3333
GM-CSF	37.025	88.18	71.667	42.7265	51.154	90.7235	65.346	62.154	174.644	64.056	45.139	73.75	73.7085	62.5695	24.6075	100
GP2	47.2545	97.0925	112.96	56.1635	84.4525	118.462	108.228	80.825	257.847	117.197	79.1805	122.445	117.508	120.25	43.215	100
GP210	22.21	37.8795	37.9565	11.945	35.822	25.306	41.7205	16.786	37.2855	19.8575	21.1905	21.7915	19.435	30.9615	15.762	100
Hemocyanin	248.678	389.22	537.851	352.132	402.21	603.826	452.454	475.099	867.808	523.203	376.06	497.42	586.436	452.818	237.779	100
Heparan Sulphate	5.744	5.073	6.7855	3.151	4.7735	3.601	5.8765	3.2	5.011	1.372	4.894	3.919	3.1515	4.1775	2.8295	86.6667
Heparin	12.185	20.853	11.4645	8.047	9.667	11.857	11.5545	9.4585	18.857	10.38	18.998	15.5765	9.7265	10.834	0.192	93.3333
Histone H1	216.964	581.4	818.769	403.333	512.66	450.857	820	264.889	854.054	242.194	565.932	450.209	462.74	416.146	494.812	100
Histone H2A	25.1065	13.5525	25.1	10.923	21.583	12.8075	19.654	9.667	23.75	8.9915	20.148	12.9095	11.313	31.27	10.125	100
Histone H2B	18.5695	35.9665	44.848	26.5	37.25	26.603	39.313	21.308	48.7335	22.3615	13.157	29.9835	29.1155	40.566	17.9665	100
Histone H3	10.632	16	23.7485	9.375	19.2305	12.4705	18.473	9.464	24.718	11.2825	10.3025	12.7555	13.4	8.0725	10.2085	100
Histone H4	6.0515	4.8	7.25	3.6425	4.577	4.94	5.9095	3.8215	5.057	4.21	4.4855	5.393	4.4135	4.852	2.7915	93.3333
IA2	22.1545	33.533	53.3565	33.219	41.2	54.3485	60.1665	51.2	114.756	62.167	41.5225	60.0615	64.7555	63.992	26.899	100
IFN-A1	30.827	111.035	78.122	51.1785	62.25	73.879	64.4945	64.9285	174.207	72.991	49.8375	67.1425	74.2845	61.4125	33.1225	100
IFN-B	4.307	12.451	13.3835	7.875	9.393	12.036	10.75	8.974	18.252	8.673	7.582	10.25	11.4405	10.579	6.1365	100
IFN-E	8.4565	11.8265	10.643	7.8465	7.4335	13.7145	6.3025	9.58	13.295	7.8845	8.393	2.8865	9.6155	10.8175	5.2085	93.3333
IFN-L2	19.9805	24.5715	17.5715	13	14.125	21.846	17.9135	16.708	34.7915	14.675	11.4575	20.0415	19.2655	17.6065	8.708	100
IFN-r	9.818	8.4335	9.8055	4.269	7.221	6.703	9.731	5.2725	10.124	5.911	7.1645	7.0205	5.667	6.878	3.875	100
IL-12	50.1805	142.519	85.6875	55.15	77.096	117.326	89.3055	79.8335	277.269	91.6745	80.057	101.133	119.645	85.246	46.6185	100
IL-15	59.4375	200.994	132.782	91.4765	23.663	129.472	7.5485	146.387	17.059	144.333	8.059	152.309	14.511	132.065	27.5625	100
Insulin	10.5395	89.397	49.1015	47.386	25.7605	81.8055	20.2305	69.316	60.077	74.3555	25.415	99.657	43.9765	65.699	25.6135	100
Intrinsic Factor (IF)	2.232	5.949	7.0305	6.351	8.394	7.6565	9.0715	6.761	11.7305	6.2155	5.999	7.6815	6.3795	7.2975	6.125	93.3333
Jo-1	56.819	465.209	361.209	320.067	309.391	522.59	325.312	410.719	739.175	490.187	217.816	533.277	377.003	362.101	173.708	100
KU (P70/P80)	43.0345	257.631	146.5	123.731	95.0315	187.531	116.266	151.429	318.088	170.125	78.8665	200.281	187.629	129.3	67.4935	100
La/SSB	98.1875	249.375	120.806	103.814	93.077	193.7	103.409	147.577	288.685	159.548	95.115	113.883	153.136	358.471	65.3335	100
Laminin	23.7255	58.971	38.5275	25.122	34.4165	44.214	41.6925	36.394	91.857	34.3015	36.5	34.4925	46.731	31.9325	17.3815	100
LC1	78.55	236.805	134.114	113.773	106.085	209.956	144.679	149.429	391.286	157.638	107.341	190.973	196.115	144.008	78.4585	100
LPS	13.3305	13.7045	15.576	9.014	16.875	18.533	16.4085	15.8845	29.3075	15.7035	26.6165	16.6905	20.0385	18.5475	7.3685	100
M2	47.01	83.5	43.9075	30.052	40.0615	71.519	48.4665	48.6335	113.454	54.3045	51.4785	62.5215	66.5265	64.9545	27.893	100
MDA5	21.231	30.8525	13.836	12.239	8.237	24.779	11.6765	16.8675	30.5595	19.224	12.7875	12.7715	16.4135	14.6865	11.0935	100
Mi-2	10.0155	17.1955	21.522	12.1645	14.014	15.161	16.5645	13.3355	35.7665	14.702	15.866	16.5555	16.451	22.127	7.2	100
Mitochondrial antigen	20.7945	46.331	40.2105	31.75	35.6925	54.0315	41.6075	41.8105	64.619	44.2915	34.5625	47.929	50.393	44.775	20.045	100
MPO	30.4825	67.006	65.1915	37.312	57.78	56.6865	72.1835	37.6785	104.412	33.0215	44.769	44.719	49.405	35.4595	31.6895	100
Muscarinic receptor	69.8565	166.225	96.25	104.966	107.974	207.5	122.893	142.808	275.146	127.048	84.676	176.775	160.935	168.325	72.596	100
Myelin basic protein (MBP)	12.9305	23.528	38.8455	21.607	33.0715	26.027	37.6785	18.036	41.2775	16.5455	30.688	20.362	28.982	19.24	27.2145	100
Myosin	26.2225	94.176	89.263	41.8965	77.375	106.354	62.422	99.6605	222.42	107.77	85.7085	111.173	118.885	111.104	40.3875	100
Myosin heavy & light chain	3.4795	1.6385	0.38	3.291	1.332	3.2675	4.7105	1.142	4	0.262	3.995	0.001	3.2695	0.3675	2.043	46.6667
Neuropilin-1	23.22	86.1865	31.1065	47.325	22.351	50.8015	35.3085	33.9035	33.9225	31.303	8.972	40.2455	17.419	33.0015	25.269	100
Nucleolin	9.7205	15.6765	15.455	9.488	10.2255	14.5665	8.2145	12.7405	11.8495	11.822	4.2195	13.2705	9.387	12.4375	7.769	100
Nucleosome antigen	135.857	242.25	375.522	231.833	312.708	350.11	410.129	172.385	449.822	269.721	355.135	366.61	267.253	247.409	209.454	100
Nup 62	10.157	6.504	6.8515	5.657	5.762	4.8535	7.6705	4.668	6.354	5.8145	6.0835	5.3445	4.9755	5.5	4.5645	100
PCNA	204.595	348.328	273.491	280.481	229.752	293.452	260.235	358.111	314.562	364.22	209.378	415.528	356.798	289.848	178.833	100
Phosphatidyl-serine (PS)	99.539	415.264	308.435	212.171	204.846	436.336	231.313	342.423	400.258	374.753	157.654	447.948	337.452	230.85	134.615	100
PL-7	36.0025	88.028	181.112	39.3935	140.143	62.462	156.587	53.077	397.347	82.49	121.471	95.7915	191.103	134.109	87.244	100
PL-12	35.302	75.2665	72.094	29.711	51.2085	68.048	60.612	52.8335	162.344	68.166	52.969	55.449	88.5715	64.722	37.875	100
PM/Scl-75	19.3405	67.242	21.7085	18.669	4.46	36.6615	4.993	27.597	16.654	38.314	9.533	35.576	12.895	41.8245	14.069	100
PM/Scl 100	19.3645	30.611	15.454	13.893	19.7405	21.094	21.8575	16.7	45.1355	18.25	18.7355	21.893	25.0165	22.1425	11.5385	100
PR3	6.272	17.5585	13.7635	11.15	10.828	11.167	13.1495	12.0415	21.326	8.9925	8.298	12.7765	10.3505	11.4865	7.872	100
Proteoglycan	5.4745	9.605	11.2835	6.247	7.2085	8.6855	9.692	8.3845	12	7.182	7.3215	8.9205	10.048	9.5295	6.182	100
Prothrombin protein	19.4375	70.1465	62.675	63.9835	63.481	78.888	82.486	67.346	133.69	58.411	46.303	61.8935	80.9875	35.1055	55.7725	100
Ribo Phosphoprotein P0	15.5775	26.1215	18.9	18.1315	20.964	24.3235	23.841	4.7625	41.491	20.772	19.332	17.971	19.889	23.7485	15.613	100
Ribo Phosphoprotein P1	5.976	14.8905	21.1415	11.9765	19.611	14.8295	18.387	13.161	18.161	15.766	12.319	11.2745	15.494	13.1355	13.2105	100
Ribo Phosphoprotein P2	2.7705	2.3305	1.874	5.262	1.8435	1.9245	5.084	0.386	16.4335	0.8885	5.496	0.941	8.173	2.1235	3.1565	40
Ro/SSA (52 Kda)	13.226	80.769	15.058	42.26	4.024	45.366	19.6	36.284	124.621	32.8375	40.9525	30.288	59.099	39.207	24.482	100
Ro/SSA (60 Kda)	46.153	239.294	141.581	131.885	96.825	200.538	121.831	160.867	363.834	178.508	122.294	154.61	202.286	162.304	68.923	100
S100	12.7865	11.286	10.288	5.5645	8.5835	8.5385	7.5355	6.25	10.375	5.668	7.129	8.3655	5.3335	7.4345	3.727	100
Scl-70/Topoisomerase I	23.036	32.594	73.685	48.115	51.0225	67.594	71.8615	45.5	120.365	50.625	67.7815	68.1075	62.1415	53.8945	37.682	100
Sm	6.3345	35.4415	63.129	2.597	37.343	37.3815	44.138	28.1635	65.955	25.1775	46.687	35.929	47.625	36.068	39.4505	93.3333
Sm/RNP	5.8625	10.116	9.778	6.1925	7.923	9.3735	9.7145	7.721	14	6.8885	9.192	9.231	9	11.691	5.75	100
SmD	3.3865	9.352	19.087	5.9515	19.8025	14.0205	14.2375	11.184	21.436	11.2035	11.912	13.3315	11.682	13.7895	16.2	100
SP100	2.1285	3.4755	10.9115	1.4695	11	3.738	8.301	3.5995	22.731	4.343	12.778	6.581	16.143	7.2285	7.731	86.6667
Sphingomyelin	7.0695	4.1295	4.756	2.5805	3.692	2.375	4.2855	2.284	5.9645	2.901	4.098	4.248	4.1155	3.2215	2.5655	66.6667
SRP54	7.772	50.891	24.6495	33.797	16.4125	52.228	10.2615	42.0815	12.998	45.22	11.851	36.3395	13.471	40.417	13.5155	100
ssDNA	197.723	47.5685	62.8335	32.0275	21.3335	36.5265	24.732	33.3575	61.869	26.2955	94.159	71.706	31.357	126.114	15.6025	100
ssRNA	9.651	6.1665	7.975	8.308	4.292	3.7445	3.996	3.5385	5.0385	2.8725	5.9145	4.184	3.404	11.5775	2.5415	86.6667
TGF-B1	5.7085	12.6835	10.85	8.6315	9.8175	10.055	11.0355	8.2305	13.7145	7.714	9.0335	10.926	13.8095	8.2885	7.9145	100
Thyroglobulin	32.2635	217.565	137.958	134.607	175.038	209.305	179.705	174.391	288.846	141.1	133.49	202.676	195.952	113.385	132.189	100
TIF1 gama	16.139	75.0415	31.7325	23.968	50.831	54.9735	35.5075	35.8125	87.2335	46.01	22.7715	40.4905	50.517	29.494	27.0015	100
TNF-a	20.368	111.2	124.015	64.707	102.731	100.452	89.7355	96.9505	274.533	124.365	76.7315	145.934	149.498	98.406	48.6665	100
TPO	14.7675	7.829	14.965	6.2985	17.192	6.0555	21.445	5.87	47.817	11.2445	18.466	13.0555	29.0535	15.5385	12.445	100
Troponin-I	8.0975	22.1185	2.436	11.9655	3.7795	14.87	3.4995	10.8645	8.9465	11.7485	15.3945	15.216	9.55	17.619	8.3025	93.3333
TTG	123.675	479.825	233.726	229.811	229.422	428.273	281.661	300.969	611.8	340.209	221.959	371.405	189.619	297.872	148.536	100
TWEAK	9.5285	18.805	23.947	12.7525	17.654	19.8855	20.7195	15.8925	34.12	16.1645	20.344	18.759	21.4025	16.3	12.4165	100
U1-snRNP 68/70	29.6685	128.947	90.0985	106.321	82.3365	123.969	135.5	101.472	195.857	84.3085	72	116.151	107.043	96.966	124.75	100
U1-snRNP A	45.3335	115.059	128.354	81.238	199.923	108.535	169.194	99.747	221.242	65.958	133.35	116.572	168.783	159.656	141.667	100
U1-snRNP B/B'	10.486	32.4065	32.6085	17.606	40.9615	26.1665	40.6355	21.0215	34.312	19.958	30.9065	37.8215	31.7665	19.7965	20.164	100
U1-snRNP C	18.1045	42.972	56.661	28.5335	51.359	43.2985	47.193	34.162	80.143	33.0535	36.206	45.243	50.1155	31.206	33.8395	100
Vimentin	6.5595	8.704	9.0105	2.4195	12.337	5.936	17.825	4.3565	35.25	9.6705	19.313	9.9435	20.1925	19.1455	10.972	93.3333
Vitronectin	4.5635	8.5285	15.061	4.698	15.4485	9.123	17.9445	8.04	37.1495	13.648	12.3545	13.912	24.7	15.2155	18.2785	100
anti-Ig control 1	377.277	570.597	658.708	646.573	1055.48	686.1	1228.11	1014.04	1509.39	495.286	920.645	1304.78	1332.66	995.016	498.327	100
anti-Ig control 2	209.595	288.625	497.783	203.454	593.676	248.839	667.447	218.417	641.505	284.415	490.705	382.175	682.404	319.474	447.741	100
anti-Ig control 3	99.2875	163.603	306.889	260.447	377.178	245.119	408.312	248.969	483.813	247.469	195.989	314.839	314.744	291.686	237.571	100
anti-Ig control 4	30.157	93.493	85.08	68.437	83.2465	93.21	127.869	74.65	141.949	66.0305	54.0695	95.1005	91.1855	73.092	74.147	100
Ig control 1	446.641	223.737	185.121	263.546	243.933	518.973	184.109	423.118	256.486	334.735	325.196	330.552	288.309	390.584	352.918	100
Ig control 2	601.729	223.025	291.939	514.913	420.938	535.375	409.279	623.997	370.575	645.029	405.224	593.457	418.776	514.992	536	100
Ig control 3	321.849	323.245	962.955	742.909	1008.61	789.705	700.942	1053.9	712.071	1221.08	698.239	1174.79	866.399	1234.42	1343.89	100
Ig control 4	130.871	319.945	437.668	700.916	1071.14	754.197	1013.11	953.906	1036.01	769.376	754.126	1074.66	775.697	705.245	837.184	100

## Sheet: IgG_NSI
ID	S2	S3	S4	S5	L1	L2	L3	A1	A2	A3	A4	C1	C2	C3	C4
Aggrecan	555.5	509.5	308.5	199.5	348.5	170.5	1262	246	158.5	2060.5	375.5	585	168.5	143	355
AGTR	1096.5	4569.5	1748	337	627	562.5	1248.5	1099.5	306.5	1736	4668	254.5	1880	221.5	765
Alpha-actinine	148	180	217	83.5	235	43.5	421	95.5	114.5	572.5	200	409.5	146.5	65	135
Alpha Fodrin	845.5	1891.5	1411.5	538.5	742	1102.5	1428.5	954.5	666.5	2901	1771.5	696	4481	1583	428.5
Amyloid	170	176	99	26.5	138.5	0.001	540	52.5	64.5	1714	172	258.5	97.5	32.5	46.5
AQP4	10007.5	17431.5	13992	4592	11432.5	5549	13939	19384.5	7834.5	13109.5	7985.5	12658	7675.5	5287.5	4859.5
B2-microglobulin	382.5	242.5	446	82.5	399.5	127	790	162.5	236.5	1866.5	518	127.5	295	66	149
B2 glycoprotein 1	1899	1398	2917.5	825.5	1685.5	1655.5	2553.5	1582	1502	3287	2663	1157	1311	385	482.5
B-actin	3839.5	7651	4572	954.5	4074.5	3457.5	3886.5	4627	2369	6311	4420.5	2785.5	3698	1219.5	421.5
BPI	2927.5	12069.5	2996	2050	2240	1620	3075	1780	2146.5	7876.5	3637	2217.5	2187.5	945	241.5
Calprotectin	5076.5	9221	13987	7988	2624	2946.5	3373	7429.5	7350	6627.5	4944.5	3428.5	3692	2136.5	1188.5
Cardolipin	516	493.5	1028	196	460	598	2038.5	632	344.5	2810.5	928	315.5	640	116.5	127.5
CD4	1402	939	1448	56.5	1390.5	745.5	1658	794	994.5	2802.5	1766	4419.5	1058.5	66	120.5
CD8	1062.5	1506	1201.5	250.5	859.5	511.5	2646.5	581.5	856	1829.5	1243	734	714	445.5	152
CENP-A	1237	616.5	809.5	6164	235.5	833.5	1724	442	454	2633.5	2150	645	763	268	324.5
CENP-B	2613.5	2103	2827	277	2888.5	1671.5	2975	2420.5	1782	6667.5	2835	1314.5	1658	592	1130
Chondroitin Sulfate	251	255.5	257.5	81	241	72	826	131.5	114.5	1960.5	378	469	148	53	159
COL17A1	207	45	190	1676.5	257.5	130.5	593.5	336	143	219	676.5	50	897.5	93.5	148
Collagen I	242.5	181	160.5	76.5	191.5	44	707.5	83.5	100	1777	279	338	132.5	61.5	152.5
Collagen II	253.5	189.5	169.5	2	193.5	26	829.5	69	108.5	2444.5	363.5	325	108.5	34.5	59.5
Collagen III	320	303	213.5	63	405.5	135	1003	168.5	121	1806	321	445	230	65.5	138.5
Collagen IV	814	596.5	486.5	47.5	546	440.5	1096	457	287.5	3152	624.5	424.5	318	335	160
Collagen V	1090	312.5	118	255	715	596.5	1713.5	87.5	471.5	3237.5	849	170	736	303	95
Collagen VI	18389	5916.5	14017	2891.5	3513	2390.5	5127.5	58402.5	11140.5	11955.5	6142	22682	3144	2627.5	5249.5
complement C1q	3829.5	1924.5	1530.5	261.5	969.5	2456	2888.5	2363.5	2089.5	4900	2687.5	208.5	2878	574.5	74.5
complement C3/C3a	1463	814	1626	0.001	1634.5	0.001	2394.5	591	1472	499.5	1865	300.5	1347	331.5	915.5
Core Histone	886.5	670	852	205.5	904	270	1490	520.5	450	2747	1031	655.5	662.5	119	453.5
CRP	16027.5	17690	17609.5	7488	11644.5	11328.5	11835	15383	12583.5	17032	14164.5	8471	13481	7842.5	6364.5
dsDNA	1578.5	830	505	182	693	291.5	1207.5	1092.5	639.5	2489.5	946.5	276	1042.5	171	239.5
EBNA1	64650	64893.5	12791.5	82.5	64938	60608	41131.5	12035.5	8062	52776.5	43807.5	28434.5	64705.5	35832.5	4839.5
Elastin	42425	4704.5	1148	229	16383.5	18466.5	16478.5	747	1892	11966.5	14672.5	1137	8895	13944	210
Factor B	11329.5	3630	4436	857.5	5654	5657.5	6415	2977	2985.5	6548	7618.5	1204	3734	2993.5	416
Factor D	1474.5	484	282	101.5	755	584	2557	241.5	257.5	5591	1234	882.5	519.5	514.5	267
Factor H	13174.5	2270	5635	272	4122.5	2424	3711.5	2527.5	3121.5	23577	16983	12807.5	2067.5	7801.5	744.5
Factor I	2507	2103	2099.5	132	1441.5	1961.5	2295.5	1325	1238	3309	2200	112.5	1257	216	282
Factor P	733.5	246.5	128	78	157.5	347	720	241.5	179.5	1917	345	82	416.5	35.5	76.5
Fibrinogen IV	35388.5	1712	1014.5	117	3084.5	1375.5	2392	1411	1185.5	3655.5	6429.5	487.5	1141	520	557
Fibrinogen S	36711.5	1740.5	1959.5	593	4068	1627	2162.5	1932.5	1228	3618	6791	184.5	1610	173	612
Fibronectin	2756.5	1335.5	1369.5	866.5	5317.5	1251.5	1848	2166.5	1467.5	2973	6317	289.5	1158.5	678	774.5
GAD65/GAD2	11054	5241.5	6970.5	1036.5	4876.5	5768.5	5664	3074.5	2561	5583.5	7194	2597.5	4094.5	6006.5	1167.5
GBM	1620.5	515	920	295.5	925.5	812.5	1201	554	467.5	3344.5	744.5	785.5	948	527.5	503.5
GDF-15	1252.5	1429.5	929.5	28	894.5	280.5	631	453.5	67	1864	2629.5	175	613	35	99
GM-CSF	1069.5	1002	1050	199.5	767	550.5	1157	617.5	503	2071.5	1116.5	151	637.5	143.5	425.5
GP2	2466	1160.5	731	607.5	307.5	796	1224	1256.5	697	3841	1616.5	926	1335	191	536.5
GP210	1763.5	708.5	4257.5	338	953	969.5	1367.5	678	1060	2379	1342.5	671	1127	372	744
Hemocyanin	10595.5	12862.5	13470	1414.5	6961.5	5392	9221	6475.5	5136	10475	13346	12273	9729	1702	6486
Heparan Sulphate	226	238	264	71.5	295	155	771	190	108.5	2179.5	209.5	134	191	128	130
Heparin	1462	349	168.5	52	4314.5	150	1271	712.5	263	1955	13429	205.5	193.5	72.5	773
Histone H1	10519.5	3323	9994.5	1319.5	3248.5	3684.5	3385	2579.5	33707.5	5581.5	5952	2768	3910.5	45460.5	7006
Histone H2A	1086.5	1039.5	610	71	921	353	1516	433.5	5617	1419.5	693.5	221.5	900	1077.5	450.5
Histone H2B	1418.5	871	1433	215.5	1340	589	1869	1153	1517.5	2640	1142.5	400.5	1131	533.5	384
Histone H3	107	212	155.5	25.5	656	195.5	724.5	451	126	2987	350	165	411	50.5	194
Histone H4	250	146	125	46	159	70.5	1001.5	76	58.5	3464	339.5	425	219	61.5	168
IA2	1153	1271	1856	93.5	1157	915	2784	1317.5	797.5	5846	1848	949	1355.5	409	620.5
IFN-A1	1174	968	409	178	900	423.5	2386	720.5	583	5264	1542.5	640.5	871.5	89.5	460
IFN-B	306.5	432	240.5	42.5	235	67	1011	143.5	106	2290	491	465.5	136.5	64	259.5
IFN-E	302.5	595.5	189.5	42	248.5	88.5	698	141.5	76.5	1640.5	366.5	361.5	132	105	200
IFN-L2	517.5	444.5	368.5	128	417.5	165.5	1445	368	458	3373.5	644.5	615	387	126	352
IFN-r	257.5	270.5	206.5	22	266.5	72	1110.5	143	89	3186.5	476	165	238.5	41.5	172.5
IL-12	1147	918.5	416.5	53	618	424.5	1401	1869.5	283	5122	1182.5	477.5	640	98	581
IL-15	1471	672.5	659	410	807.5	546.5	2063	805	524.5	3897.5	1406.5	405.5	644	94.5	391.5
Insulin	522.5	433.5	501	62.5	342.5	316	888	465	239	2149.5	751	604.5	401.5	238.5	300.5
Intrinsic Factor (IF)	310	177	169.5	62.5	173.5	151.5	602.5	121.5	121.5	1787	354.5	302	210.5	114.5	179.5
Jo-1	6253	5518.5	5192	678	3495.5	4067.5	5526.5	6253	3997	9953	6518.5	5091.5	4514.5	2125.5	1829.5
KU (P70/P80)	3450	2243.5	695	353	1733	1731.5	3255.5	2463	2016.5	6739.5	2469	2708	2366.5	664	895.5
La/SSB	3043	2669.5	1985	421	1439.5	1428	3733.5	2713	2241.5	6885	3016.5	2188	1767	798.5	674.5
Laminin	1275.5	1048.5	945.5	281	880.5	398.5	2099	739	712.5	4762	1441.5	863.5	760.5	305.5	538
LC1	4367	2963.5	1877	313	2173.5	2800.5	5264	2127	2048.5	6342	4922.5	2099.5	2863.5	257.5	362.5
LPS	8081	1296	2159.5	319.5	7823	3455	10884.5	1474.5	1828	8091.5	4260	1799	3879	408	4873
M2	1404.5	631	770.5	164.5	388.5	733.5	838.5	885	265.5	3628.5	1073.5	702.5	1602.5	236.5	874
MDA5	1689	1412.5	1189	265	1054.5	1237	2662	874.5	624.5	3988	1594.5	92.5	1666	432.5	1112
Mi-2	675	464.5	763.5	182.5	527.5	239.5	1527	421.5	450	2703.5	1040	663.5	793	349	272
Mitochondrial antigen	1386.5	9637.5	1193	349.5	2223.5	836.5	1923.5	977	1339	3680	2295	1553	1371.5	1377	1171
MPO	899.5	626.5	698.5	170	669	464.5	899.5	322.5	341.5	2354	876.5	353.5	863.5	209.5	524.5
Muscarinic receptor	32208.5	5104.5	8853.5	1159	15347	6420	4425.5	3095	3441	5613.5	4492.5	2093.5	2481.5	1440	652.5
Myelin basic protein (MBP)	756	489	620.5	99.5	773.5	505.5	1231	298.5	240.5	2678.5	587	133.5	649	75.5	185
Myosin	2779	2220	2889.5	691	1780	1450	1591.5	1976	1527	5134.5	3270	918.5	1778.5	864.5	933
Myosin heavy & light chain	261.5	177	119.5	122.5	215	136.5	767.5	174.5	50.5	2223	246	453.5	115	89	149.5
Neuropilin-1	1570	1284.5	1293.5	536.5	1029.5	924	1868.5	1178	829.5	3247	1690	906.5	1029.5	610.5	734.5
Nucleolin	390.5	179.5	325	73.5	239.5	158	830.5	254	245.5	2237.5	522	467	271	120	226.5
Nucleosome antigen	3599.5	1961	4877.5	1375.5	3007.5	2141.5	4110	1134	3148	4938	5789.5	2486.5	2539.5	1988	1263.5
Nup 62	176.5	115.5	159	43	288.5	56	577	99.5	37.5	1790	229	377.5	197	62	146
PCNA	3064	2371	2630.5	793.5	1733	1982	3448.5	2202	1754	6178.5	3443	1685	2341.5	923	1152
Phosphatidyl-serine (PS)	2525.5	1772	2076	674	1110.5	1091.5	2164	1399.5	1043.5	5374	2368	1349	1688.5	717	686
PL-7	3822	2949.5	2237	893	2366.5	4087	6562.5	6341	1823.5	6237.5	3569	882	9222	936.5	1019
PL-12	1971	1371	1872	475	1330	904	3245	1508.5	862	3141	3502	945.5	1554	594	731.5
PM/Scl-75	1726.5	1030	6389	419	1634.5	1141.5	1963.5	769	658.5	4616	1951.5	1882	1389	541.5	772.5
PM/Scl 100	785.5	504.5	273	155	665	339	2396.5	520.5	337.5	2461	964	706.5	631	143	117
PR3	404.5	264	292.5	90	307	135.5	958.5	230.5	222.5	2259	403.5	394	278	120.5	141.5
Proteoglycan	343.5	255.5	242.5	92	300.5	132	792.5	216.5	126.5	1548	430	340.5	259	105	188.5
Prothrombin protein	1021.5	723.5	927	338.5	657	550.5	1049.5	713.5	550.5	4528.5	922	828.5	680.5	400	504.5
Ribo Phosphoprotein P0	531.5	531.5	336.5	105	376	175	846	252	171.5	1542.5	456.5	361	309	197.5	351.5
Ribo Phosphoprotein P1	607	612.5	679.5	329	743	718	1195	516	339.5	1715.5	428	529.5	799.5	268.5	450.5
Ribo Phosphoprotein P2	1234	1888.5	1977	940	1931.5	313.5	900.5	2662	485	3351.5	755	983	1458	402.5	432.5
Ro/SSA (52 Kda)	2206.5	2268.5	3222	1100.5	1313	1283.5	1861.5	1886	1985.5	3308.5	2403	2040.5	1698.5	741.5	1027.5
Ro/SSA (60 Kda)	3980.5	6659.5	5535.5	1473	4550	2413	4374	7084	1248	6532.5	5013.5	1536.5	11222	523	265.5
S100	250.5	365	393.5	103.5	39508	101.5	761	256.5	131.5	1809	752	12508.5	497	238.5	373.5
Scl-70/Topoisomerase I	6406	875.5	1895.5	461.5	1722.5	1159.5	4443	698.5	773.5	1471	2182.5	1263	4759.5	515.5	753
Sm	1204.5	627	1157.5	189	1085	551	1198.5	583	1302	1846.5	1752	852.5	1183	356	652.5
Sm/RNP	358.5	224	176.5	55	250.5	113.5	498	252	119	1888.5	435.5	378.5	388	88	203
SmD	747.5	430	445.5	129	430	345.5	835.5	364	1078.5	2047.5	625	665	468.5	200	328.5
SP100	437.5	508.5	618.5	165.5	390	345.5	869.5	384.5	324	1858.5	762.5	861	566.5	166	223.5
Sphingomyelin	152	156	123.5	56.5	157.5	33	393	112.5	93	988.5	255.5	411	132	49.5	143.5
SRP54	1292.5	1324	892.5	395	735.5	714.5	1512.5	1262.5	422.5	2782.5	3182.5	1184	1240	440.5	366
ssDNA	11145	6447.5	13872	3336.5	2913.5	3050.5	3432	60323.5	16122	16068	7263.5	19268.5	3787	2434.5	7822.5
ssRNA	437	156.5	141	666.5	121	20	266.5	182	67.5	1180	294.5	249	181	25	94
TGF-B1	368	251.5	308	18.5	329.5	154	456.5	224.5	147.5	776.5	274.5	195.5	608	118.5	63
Thyroglobulin	18338	2537	2693	1065.5	1719.5	2581	1962.5	2060	1376.5	43999.5	2174.5	9213	1568.5	882.5	1149.5
TIF1 gama	1654	1137.5	1210.5	474	1010.5	1269.5	1281.5	536	1341.5	1986.5	1137	1076.5	1564.5	506	644
TNF-a	2484	1924.5	2419.5	952	4770.5	1285	2641.5	2484	1690	2933.5	2399.5	2404	1890	874.5	1064
TPO	2435	976.5	3058.5	848	1647	1346.5	1571.5	1397	874	10508.5	3233.5	1461.5	3083.5	925	928.5
Troponin-I	1631.5	632.5	469.5	1019	719.5	797.5	1339.5	1704.5	422	2095.5	4096.5	825.5	1630.5	1015	233.5
TTG	6874.5	14431	11170.5	2989.5	5616.5	4338.5	7054	11866.5	4609	8402.5	8478.5	3903	6205.5	2922.5	4523.5
TWEAK	1142.5	388.5	554.5	352	1317	310	762.5	549	348.5	1531	615	551.5	670.5	246	421
U1-snRNP 68/70	2568.5	2172.5	3122	834.5	1684	1300.5	2138	1398.5	1289.5	3203.5	2084	1500.5	1753	913.5	1219
U1-snRNP A	1326	601	621.5	108.5	1294	1754	2215	672.5	1577.5	2658.5	1176	497.5	1492	199	241
U1-snRNP B/B'	526.5	331	420	88.5	446	165	835.5	219.5	249	1692	511	559	432.5	577	376.5
U1-snRNP C	1217.5	959.5	1009	361.5	1158.5	542.5	1712.5	617	631.5	2850.5	1050.5	940.5	710.5	425	602
Vimentin	511	174.5	247.5	163	506	372.5	1110	611.5	434	2370.5	816	515	656	275.5	255
Vitronectin	1156	812.5	819	378	707	439	1298	668	580	1943.5	924.5	771.5	1084.5	398.5	580
anti-Ig control 1	64922.5	64919.5	65037.5	65084.5	65080	64849.5	65063	65082.5	65087	64799	65009	65183	64800.5	65096.5	65145
anti-Ig control 2	62713	56056	62043	33311	64806	30836.5	63963	31011.5	62521	36465	62502	30522	63885.5	16623	52330.5
anti-Ig control 3	29746.5	24144.5	33627	18385.5	34539	19323	29573.5	20443	32501	25207.5	32138	20120.5	35311	21271	12330
anti-Ig control 4	9866	7260.5	9383	3498.5	7913	9720	8190.5	9434	6411.5	10037.5	11901.5	6986.5	10913	6916	6179
Ig control 1	64893.5	56253.5	43882.5	47941	60161	60531	64232.5	58609	55169.5	63442.5	61080	55236.5	64870.5	55841	51891.5
Ig control 2	47824	35763.5	43550.5	22053.5	38282.5	39487	41147.5	35570	28841.5	41307.5	38373.5	29803.5	43207	33935	20064
Ig control 3	22580	19303	18151	13701	17158.5	16641	19355	14912	21870.5	18065	19060	14360	19520	18063.5	17135.5
Ig control 4	12946.5	7593	10485.5	6436	11681	7560.5	10820	7102	9551	8453.5	10449	6782	9748	6791	6903

## Sheet: IgG_NSI-nor
ID	S2	S3	S4	S5	L1	L2	L3	A1	A2	A3	A4	C1	C2	C3	C4
Aggrecan	465.181	516.149	312.532	264.575	329.832	165.346	1121.51	255.044	165.41	1890.92	350.757	663.689	147.79	150.278	439.126
AGTR	918.22	4629.13	1770.85	446.927	593.413	545.497	1109.51	1139.92	319.862	1593.12	4360.41	288.733	1648.93	232.773	946.285
Alpha-actinine	123.937	182.349	219.836	110.737	222.412	42.1851	374.133	99.011	119.492	525.382	186.821	464.583	128.494	68.3082	166.991
Alpha Fodrin	708.03	1916.18	1429.95	714.155	702.253	1069.17	1269.48	989.591	695.556	2662.24	1654.77	789.62	3930.25	1663.57	530.043
Amyloid	142.36	178.297	100.294	35.1441	131.081	0.000969773	479.886	54.4301	67.3119	1572.93	160.666	293.271	85.5165	34.1541	57.5193
AQP4	8380.38	17659	14174.9	6089.88	10820.1	5381.27	12387.3	20097.2	8176.04	12030.6	7459.31	14360.7	6732.13	5556.61	6011.07
B2-microglobulin	320.309	245.664	451.83	109.411	378.1	123.161	702.056	168.474	246.81	1712.88	483.867	144.65	258.742	69.3591	184.309
B2 glycoprotein 1	1590.24	1416.24	2955.63	1094.77	1595.21	1605.46	2269.24	1640.16	1567.48	3016.47	2487.53	1312.63	1149.87	404.595	596.84
B-actin	3215.24	7750.84	4631.76	1265.85	3856.24	3352.99	3453.85	4797.11	2472.28	5791.59	4129.22	3160.18	3243.49	1281.57	521.384
BPI	2451.52	12227	3035.16	2718.7	2120.01	1571.03	2732.68	1845.44	2240.08	7228.24	3397.35	2515.78	1918.64	993.097	298.729
Calprotectin	4251.11	9341.33	14169.8	10593.6	2483.44	2857.44	2997.51	7702.64	7670.42	6082.04	4618.69	3889.67	3238.23	2245.24	1470.14
Cardolipin	432.104	499.94	1041.44	259.934	435.359	579.924	1811.57	655.235	359.518	2579.19	866.851	357.938	561.339	122.429	157.714
CD4	1174.05	951.253	1466.93	74.9299	1316.01	722.966	1473.43	823.191	1037.85	2571.85	1649.63	5013.98	928.403	69.3591	149.055
CD8	889.748	1525.65	1217.2	332.211	813.459	496.039	2351.89	602.878	893.317	1678.93	1161.09	832.732	626.244	468.174	188.02
CENP-A	1035.88	624.545	820.081	8174.65	222.885	808.306	1532.08	458.25	473.792	2416.76	2008.33	731.76	669.222	281.64	401.398
CENP-B	2188.57	2130.44	2863.95	367.355	2733.77	1620.98	2643.82	2509.49	1859.69	6118.75	2648.19	1491.32	1454.22	622.13	1397.78
Chondroitin Sulfate	210.19	258.834	260.866	107.422	228.09	69.8237	734.048	136.334	119.492	1799.15	353.092	532.086	129.81	55.6975	196.679
COL17A1	173.344	45.5872	192.484	2223.36	243.706	126.555	527.43	348.353	149.234	200.976	631.923	56.7256	787.191	98.2588	183.072
Collagen I	203.072	183.362	162.598	101.454	181.242	42.67	628.74	86.5698	104.359	1630.75	260.616	383.465	116.215	64.6301	188.639
Collagen II	212.283	191.973	171.716	2.65239	183.135	25.2141	737.158	71.5367	113.23	2243.31	339.548	368.716	95.1646	36.2559	73.5999
Collagen III	267.971	306.954	216.291	83.5502	383.778	130.919	891.344	174.695	126.275	1657.36	299.848	504.858	201.731	68.8337	171.321
Collagen IV	681.652	604.284	492.859	62.9942	516.752	427.185	973.991	473.801	300.033	2892.58	583.35	481.6	278.915	352.05	197.916
Collagen V	912.777	316.578	119.542	338.179	676.699	578.47	1522.75	90.7169	492.055	2971.04	793.057	192.867	645.54	318.421	117.513
Collagen VI	15399.1	5993.71	14200.2	3834.69	3324.82	2318.24	4556.7	60549.6	11626.2	10971.5	5737.28	25733	2757.58	2761.23	6493.49
complement C1q	3206.86	1949.61	1550.51	346.799	917.566	2381.76	2566.95	2450.39	2180.59	4496.72	2510.41	236.546	2524.27	603.74	92.1545
complement C3/C3a	1225.13	824.622	1647.25	0.001	1546.94	0.001	2127.94	612.728	1536.17	458.39	1742.11	340.921	1181.44	348.372	1132.45
Core Histone	742.364	678.743	863.137	272.533	855.575	261.839	1324.13	539.636	469.618	2520.91	963.064	743.673	581.074	125.057	560.968
CRP	13421.6	17920.8	17839.7	9930.53	11020.7	10986.1	10517.5	15948.5	13132.1	15630.2	13231.2	9610.45	11824.1	8241.65	7872.72
dsDNA	1321.85	840.831	511.601	241.367	655.878	282.689	1073.08	1132.66	667.379	2284.61	884.132	313.125	914.369	179.703	296.255
EBNA1	54138.6	65740.3	12958.7	109.411	61459.4	58776	36552.7	12478	8413.46	48432.8	40920.9	32259.3	56752.7	37656.2	5986.33
Elastin	35527.1	4765.89	1163.01	303.698	15505.9	17908.3	14644.1	774.463	1974.48	10981.6	13705.7	1289.94	7801.74	14653.7	259.765
Factor B	9487.44	3677.37	4493.98	1137.21	5351.13	5486.49	5700.87	3086.45	3115.65	6009.08	7116.49	1365.95	3275.06	3145.86	514.581
Factor D	1234.76	490.316	285.686	134.609	714.556	566.348	2272.35	250.379	268.726	5130.85	1152.69	1001.21	455.65	540.686	330.272
Factor H	11032.5	2299.62	5708.66	360.724	3901.67	2350.73	3298.33	2620.42	3257.58	21636.5	15863.9	14530.3	1813.39	8198.57	920.927
Factor I	2099.39	2130.44	2126.94	175.057	1364.28	1902.21	2039.96	1373.71	1291.97	3036.66	2055.03	127.633	1102.51	226.994	348.827
Factor P	614.24	249.717	129.673	103.443	149.063	336.511	639.848	250.379	187.325	1759.23	322.267	93.03	365.309	37.3068	94.6285
Fibrinogen IV	29634.7	1734.34	1027.76	155.165	2919.27	1333.92	2125.72	1462.87	1237.18	3354.64	6005.84	553.075	1000.76	546.466	688.994
Fibrinogen S	30742.6	1763.21	1985.11	786.432	3850.09	1577.82	1921.77	2003.55	1281.53	3320.23	6343.52	209.317	1412.12	181.805	757.028
Fibronectin	2308.32	1352.93	1387.4	1149.15	5032.65	1213.67	1642.28	2246.15	1531.48	2728.31	5900.75	328.441	1016.11	712.508	958.036
GAD65/GAD2	9256.73	5309.9	7061.61	1374.6	4615.28	5594.14	5033.47	3187.53	2672.65	5123.96	6719.96	2946.89	3591.26	6312.21	1444.17
GBM	1357.02	521.72	932.025	391.89	875.923	787.941	1067.3	574.367	487.88	3069.24	695.442	891.159	831.484	554.348	622.816
GDF-15	1048.86	1448.15	941.65	37.1334	846.584	272.021	560.756	470.173	69.9208	1710.59	2456.23	198.54	537.658	36.7814	122.46
GM-CSF	895.61	1015.08	1063.72	264.575	725.914	533.86	1028.2	640.202	524.928	1901.01	1042.93	171.311	559.147	150.804	526.332
GP2	2065.05	1175.64	740.555	805.662	291.028	771.939	1087.74	1302.69	727.385	3524.87	1509.98	1050.56	1170.92	200.721	663.636
GP210	1476.77	717.745	4313.15	448.253	901.95	940.195	1215.27	702.926	1106.21	2183.2	1254.04	761.257	988.483	390.933	920.309
Hemocyanin	8872.78	13030.3	13646.1	1875.9	6588.59	5229.02	8194.5	6713.57	5359.9	9612.88	12466.6	13923.9	8533.23	1788.63	8023.01
Heparan Sulphate	189.255	241.106	267.451	94.8228	279.198	150.315	685.171	196.985	113.23	2000.12	195.695	152.025	167.525	134.515	160.807
Heparin	1224.29	353.554	170.702	68.962	4083.38	145.466	1129.51	738.694	274.465	1794.1	12544.1	233.142	169.717	76.19	956.181
Histone H1	8809.13	3366.36	10125.1	1749.91	3074.49	3573.13	3008.17	2674.33	35177	5122.13	5559.8	3140.33	3429.87	47774.3	8666.24
Histone H2A	909.846	1053.06	617.973	94.1597	871.664	342.33	1347.24	449.437	5861.87	1302.67	647.803	251.294	789.383	1132.34	557.257
Histone H2B	1187.87	882.366	1451.73	285.795	1268.22	571.196	1660.94	1195.39	1583.65	2422.72	1067.22	454.372	991.992	560.653	474.998
Histone H3	89.6029	214.766	157.533	33.8179	620.86	189.591	643.847	467.581	131.493	2741.16	326.937	187.194	360.485	53.0702	239.973
Histone H4	209.353	147.905	126.634	61.0049	150.483	68.369	890.011	78.7941	61.0503	3178.9	317.129	482.168	192.083	64.6301	207.812
IA2	965.534	1287.59	1880.26	123.999	1095.02	887.342	2474.08	1365.94	832.267	5364.86	1726.23	1076.65	1188.9	429.816	767.542
IFN-A1	983.119	980.632	414.346	236.062	851.789	410.699	2120.39	746.989	608.416	4830.76	1440.86	726.655	764.386	94.0552	569.008
IFN-B	256.666	437.637	243.644	56.3632	222.412	64.9748	898.453	148.776	110.621	2101.53	458.646	528.115	119.723	67.2573	320.995
IFN-E	253.317	603.271	191.977	55.7001	235.188	85.8249	620.297	146.702	79.835	1505.48	342.35	410.126	115.776	110.344	247.395
IFN-L2	433.36	450.3	373.317	169.753	395.135	160.497	1284.14	381.529	477.966	3095.85	602.032	697.725	339.435	132.413	435.415
IFN-r	215.633	274.03	209.199	29.1762	252.224	69.8237	986.877	148.257	92.8799	2924.24	444.635	187.194	209.187	43.6122	213.378
IL-12	960.509	930.486	421.944	70.2882	584.895	411.669	1245.04	1938.23	295.337	4700.45	1104.58	541.729	561.339	102.988	718.682
IL-15	1231.83	681.276	667.614	543.739	764.244	529.981	1833.34	834.595	547.365	3576.72	1313.82	460.045	564.848	99.3097	484.275
Insulin	437.547	439.157	507.549	82.8871	324.153	306.448	789.146	482.095	249.419	1972.59	701.514	685.812	352.153	250.639	371.711
Intrinsic Factor (IF)	259.597	179.31	171.716	82.8871	164.206	146.921	535.428	125.967	126.797	1639.92	331.141	342.623	184.628	120.328	222.037
Jo-1	5236.32	5590.51	5259.86	899.159	3308.25	3944.55	4911.28	6482.89	4171.25	9133.84	6088.97	5776.37	3959.64	2233.68	2263.04
KU (P70/P80)	2889.06	2272.78	704.084	468.146	1640.17	1679.16	2893.09	2553.55	2104.41	6184.82	2306.31	3072.26	2075.64	697.795	1107.71
La/SSB	2548.24	2704.34	2010.95	558.327	1362.39	1384.84	3317.88	2812.74	2339.22	6318.35	2817.73	2482.31	1549.82	839.14	834.339
Laminin	1068.12	1062.18	957.859	372.66	833.334	386.455	1865.33	766.169	743.561	4370.07	1346.51	979.651	667.029	321.049	665.492
LC1	3656.97	3002.17	1901.53	415.098	2057.07	2715.85	4678	2205.2	2137.8	5820.04	4598.14	2381.91	2511.55	270.606	448.403
LPS	6767.11	1312.91	2187.73	423.719	7403.94	3350.57	9672.81	1528.71	1907.69	7425.55	3979.29	2040.99	3402.24	428.766	6027.77
M2	1176.14	639.234	780.571	218.159	367.689	711.329	745.156	917.536	277.074	3329.86	1002.76	796.995	1405.54	248.537	1081.12
MDA5	1414.39	1430.93	1204.54	351.441	998.013	1199.61	2365.66	906.65	651.725	3659.78	1489.43	104.942	1461.24	454.513	1375.51
Mi-2	565.252	470.561	773.48	242.03	499.243	232.261	1357.01	436.996	469.618	2480.99	971.471	752.749	695.535	366.763	336.457
Mitochondrial antigen	1161.07	9763.26	1208.59	463.504	2104.39	811.215	1709.37	1012.92	1397.37	3377.13	2143.77	1761.9	1202.93	1447.08	1448.5
MPO	753.25	634.675	707.63	225.453	633.163	450.46	799.366	334.356	356.388	2160.26	818.745	401.05	757.37	220.163	648.793
Muscarinic receptor	26971.7	5171.11	8969.22	1537.06	14524.9	6225.94	3932.84	3208.79	3591.01	5151.49	4196.47	2375.1	2176.51	1513.29	807.125
Myelin basic protein (MBP)	633.082	495.381	628.611	131.956	732.065	490.22	1093.96	309.474	250.985	2458.05	548.321	151.457	569.233	79.3426	228.84
Myosin	2327.16	2248.97	2927.27	916.399	1684.65	1406.17	1414.33	2048.65	1593.57	4711.92	3054.53	1042.05	1559.91	908.5	1154.1
Myosin heavy & light chain	218.983	179.31	121.062	162.459	203.483	132.374	682.06	180.915	52.7015	2040.04	229.79	514.501	100.866	93.5297	184.928
Neuropilin-1	1314.73	1301.26	1310.41	711.503	974.352	896.07	1660.49	1221.31	865.662	2979.76	1578.64	1028.43	902.967	641.572	908.557
Nucleolin	327.009	181.842	329.248	97.4752	226.671	153.224	738.047	263.338	256.202	2053.35	487.604	529.817	237.692	126.108	280.175
Nucleosome antigen	3014.26	1986.59	4941.25	1824.18	2846.4	2076.77	3652.47	1175.69	3285.24	4531.59	5408.01	2820.96	2227.38	2089.18	1562.92
Nup 62	147.803	117.007	161.078	57.0263	273.046	54.3073	512.767	103.158	39.1348	1642.68	213.91	428.278	172.787	65.1556	180.598
PCNA	2565.82	2401.94	2664.88	1052.33	1640.17	1922.09	3064.61	2282.95	1830.46	5669.99	3216.13	1911.65	2053.71	969.977	1424.99
Phosphatidyl-serine (PS)	2114.88	1795.12	2103.14	893.854	1051.01	1058.51	1923.1	1450.95	1088.99	4931.7	2211.96	1530.46	1480.97	753.492	848.564
PL-7	3200.58	2987.99	2266.24	1184.29	2239.73	3963.46	5831.95	6574.12	1902.99	5724.14	3333.83	1000.64	8088.55	984.164	1260.48
PL-12	1650.54	1388.89	1896.47	629.942	1258.75	876.675	2883.76	1563.96	899.579	2882.49	3271.24	1072.68	1363	624.232	904.846
PM/Scl-75	1445.79	1043.44	6472.51	555.675	1546.94	1107	1744.92	797.272	687.207	4236.09	1822.91	2135.15	1218.28	569.06	955.562
PM/Scl 100	657.786	511.083	276.568	205.56	629.377	328.753	2129.72	539.636	352.213	2258.45	900.479	801.533	553.445	150.278	144.726
PR3	338.732	267.445	296.323	119.357	290.555	131.404	851.798	238.974	232.2	2073.08	376.912	446.998	243.832	126.633	175.032
Proteoglycan	287.65	258.834	245.67	122.01	284.403	128.01	704.277	224.459	132.015	1420.6	401.666	386.301	227.167	110.344	233.17
Prothrombin protein	855.414	732.941	939.117	448.916	621.806	533.86	932.667	739.731	574.499	4155.79	861.246	939.943	596.862	420.358	624.053
Ribo Phosphoprotein P0	445.083	538.436	340.898	139.25	355.859	169.71	751.822	261.265	178.976	1415.55	426.42	409.559	271.022	207.552	434.796
Ribo Phosphoprotein P1	508.308	620.493	688.382	436.317	703.199	696.297	1061.97	534.97	354.3	1574.31	399.798	600.724	701.236	282.166	557.257
Ribo Phosphoprotein P2	1033.36	1913.14	2002.84	1246.62	1828.03	304.024	800.254	2759.87	506.143	3075.66	705.251	1115.23	1278.8	422.986	534.991
Ro/SSA (52 Kda)	1847.75	2298.1	3264.11	1459.48	1242.67	1244.7	1654.27	1955.34	2072.06	3036.2	2244.66	2314.97	1489.74	779.239	1270.99
Ro/SSA (60 Kda)	3333.31	6746.4	5607.85	1953.48	4306.27	2340.06	3887.08	7344.44	1302.41	5994.86	4683.14	1743.18	9842.73	549.619	328.417
S100	209.771	369.763	398.643	137.261	37391.6	98.432	676.284	265.93	137.233	1660.11	702.448	14191	435.915	250.639	462.01
Scl-70/Topoisomerase I	5364.45	886.925	1920.28	612.038	1630.23	1124.45	3948.4	724.18	807.22	1349.93	2038.69	1432.89	4174.52	541.737	931.441
Sm	1008.66	635.182	1172.63	250.65	1026.88	534.345	1065.08	604.433	1358.76	1694.53	1636.55	967.171	1037.6	374.119	807.125
Sm/RNP	300.211	226.923	178.807	72.9406	237.081	110.069	442.562	261.265	124.188	1733.07	406.803	429.413	340.312	92.4789	251.106
SmD	625.964	435.611	451.323	171.079	406.966	335.057	742.49	377.382	1125.52	1878.99	583.817	754.45	410.918	210.179	406.346
SP100	366.367	515.136	626.584	219.485	369.109	335.057	772.705	398.636	338.125	1705.54	712.256	976.815	496.873	174.449	276.464
Sphingomyelin	127.286	158.036	125.114	74.9299	149.063	32.0025	349.25	116.636	97.0543	907.144	238.664	466.284	115.776	52.0194	177.506
SRP54	1082.35	1341.28	904.166	523.846	696.101	692.903	1344.13	1308.91	440.919	2553.49	2972.79	1343.26	1087.59	462.92	452.732
ssDNA	9332.93	6531.64	14053.3	4424.84	2757.43	2958.29	3049.94	62541.2	16824.8	14745.6	6784.88	21860.3	3321.55	2558.41	9676.23
ssRNA	365.948	158.542	142.843	883.908	114.518	19.3955	236.833	188.691	70.4426	1082.88	275.094	282.493	158.754	26.2724	116.276
TGF-B1	308.167	254.782	312.026	24.5346	311.849	149.345	405.681	232.754	153.93	712.592	256.412	221.797	533.272	124.531	77.9294
Thyroglobulin	15356.4	2570.11	2728.2	1413.06	1627.39	2502.98	1744.03	2135.73	1436.51	40378.2	2031.22	10452.3	1375.72	927.416	1421.9
TIF1 gama	1385.08	1152.34	1226.32	628.615	956.37	1231.13	1138.84	555.706	1399.98	1823.01	1062.08	1221.3	1372.21	531.753	796.611
TNF-a	2080.13	1949.61	2451.13	1262.54	4514.96	1246.16	2347.44	2575.32	1763.67	2692.06	2241.39	2727.37	1657.71	919.009	1316.14
TPO	2039.09	989.243	3098.48	1124.61	1558.77	1305.8	1396.56	1448.36	912.102	9643.62	3020.43	1658.09	2704.52	972.079	1148.53
Troponin-I	1366.23	640.754	475.637	1351.39	680.958	773.394	1190.38	1767.16	440.397	1923.03	3826.57	936.54	1430.1	1066.66	288.833
TTG	5756.78	14619.3	11316.5	3964.65	5315.64	4207.36	6268.73	12302.8	4809.93	7710.95	7919.82	4428	5442.8	3071.24	5595.45
TWEAK	956.741	393.57	561.748	466.82	1246.45	300.63	677.617	569.184	363.693	1404.99	574.476	625.683	588.091	258.52	520.766
U1-snRNP 68/70	2150.89	2200.85	3162.81	1106.71	1593.79	1261.19	1899.99	1449.91	1345.72	2939.84	1946.68	1702.34	1537.54	959.994	1507.87
U1-snRNP A	1110.41	608.843	629.624	143.892	1224.68	1700.98	1968.42	697.224	1646.27	2439.7	1098.51	564.42	1308.62	209.128	298.111
U1-snRNP B/B'	440.896	335.319	425.49	117.368	422.109	160.013	742.49	227.57	259.855	1552.74	477.329	634.192	379.343	606.367	465.721
U1-snRNP C	1019.55	972.021	1022.19	479.419	1096.44	526.102	1521.86	639.683	659.03	2615.9	981.279	1067.01	623.174	446.631	744.658
Vimentin	427.917	176.777	250.735	216.169	478.895	361.241	986.433	633.981	452.92	2175.4	762.231	584.274	575.373	289.522	315.428
Vitronectin	968.046	823.103	829.705	501.301	669.128	425.73	1153.5	692.558	605.285	1783.54	863.582	875.276	951.207	418.782	717.445
anti-Ig control 1	54366.8	65766.7	65887.6	86314.6	61593.8	62889.3	57820.1	67475.2	67924.4	59465.9	60725.3	73950.9	56836	68409.7	80582.7
anti-Ig control 2	52516.5	56787.5	62854	44176.8	61334.5	29904.4	56842.5	32151.6	65246.6	33463.8	58383.5	34627.6	56033.5	17469	64731.5
anti-Ig control 3	24910	24459.6	34066.5	24382.7	32688.8	18738.9	26281.3	21194.6	33917.9	23132.9	30020.3	22826.9	30971	22353.6	15251.9
anti-Ig control 4	8261.89	7355.24	9505.65	4639.69	7489.12	9426.2	7278.72	9780.83	6691.01	9211.39	11117.3	7926.27	9571.71	7268	7643.26
Ig control 1	54342.5	56987.6	44456.1	63579	56938.3	58701.3	57082	60763.7	57574.6	58221	57055.2	62666.5	56897.4	58683.1	64188.4
Ig control 2	40048.3	36230.2	44119.8	29247.2	36231.8	38293.4	36566.9	36877.7	30098.8	37907.8	35844.9	33812.4	37896.5	35662.2	24818.6
Ig control 3	18908.7	19554.9	18388.3	18170.2	16239.4	16138	17200.4	15460.2	22823.9	16578.2	17804.1	16291.6	17120.8	18982.9	21196.2
Ig control 4	10841.5	7692.08	10622.6	8535.38	11055.3	7331.97	9615.5	7363.1	9967.37	7757.75	9760.48	7694.26	8549.9	7136.63	8538.83

## Sheet: IgG_SBR
ID	S2	S3	S4	S5	L1	L2	L3	A1	A2	A3	A4	C1	C2	C3	C4
Aggrecan	1.75372	1.67813	1.55033	1.44946	1.64174	1.20859	3.27454	1.53118	1.34111	3.21506	1.603	2.51655	1.14588	1.33008	1.80163
AGTR	2.34628	7.33143	4.02357	1.68112	2.2427	1.75167	3.48348	2.71285	1.68701	3.13851	8.84626	1.59949	3.24335	1.46911	2.60654
Alpha-actinine	1.20792	1.29778	1.42174	1.25784	1.46977	1.04915	1.8562	1.23694	1.25805	1.70785	1.35793	2.15252	1.1652	1.16739	1.35908
Alpha Fodrin	2.20472	4.04425	3.4232	2.35636	2.4851	2.58634	3.7433	3.0472	2.35232	4.75513	4.09575	2.91013	6.58577	4.35883	2.02011
Amyloid	1.2406	1.28213	1.20808	1.1495	1.29168	1.001	2.07767	1.1657	1.16972	3.02505	1.30271	1.73812	1.09386	1.11501	1.18193
AQP4	12.0239	21.4651	20.0837	9.33764	17.3932	6.42911	21.056	30.9083	12.7205	12.4967	11.3259	24.4558	8.38783	8.99842	9.73512
B2-microglobulin	1.50743	1.39635	1.83554	1.28869	1.75881	1.15858	2.52481	1.39129	1.50711	3.2935	1.85572	1.38908	1.3423	1.18345	1.43544
B2 glycoprotein 1	3.41729	3.11272	5.94064	2.95082	3.88712	3.12034	5.35327	4.0718	3.74621	4.86411	4.97034	3.67727	2.44229	1.76478	2.13604
B-actin	6.15155	11.5773	8.78562	3.05297	8.24809	5.62682	8.17537	10.1655	5.49908	8.45814	7.91998	7.95403	4.96133	3.46971	1.96125
BPI	4.98654	17.6067	6.06607	5.2047	5.16226	3.13825	6.56872	4.44289	5.09334	9.86003	6.78571	6.17143	3.38021	2.78887	1.62614
Calprotectin	6.47289	13.458	21.6251	16.883	5.33548	4.5597	6.48002	13.3546	13.6704	7.5504	8.40754	8.14686	4.79259	4.53827	3.32667
Cardolipin	1.64638	1.75055	2.75411	1.53277	1.85879	1.76116	4.73024	2.29401	1.6862	4.2422	2.46451	1.8794	1.69006	1.27759	1.36389
CD4	2.72243	2.30756	3.37329	1.23799	3.36904	1.84745	3.9102	2.50794	2.78212	3.88755	3.61839	11.0227	2.07158	1.18041	1.3626
CD8	1.94427	2.73272	2.5468	1.60411	2.18432	1.41276	4.62143	1.93362	2.1927	2.4412	2.40052	2.50179	1.47863	1.71609	1.4263
CENP-A	2.47958	1.9966	2.44664	15.2557	1.43225	2.11337	4.07852	1.88372	1.87792	4.22025	4.30165	2.54788	1.8589	1.55937	1.76437
CENP-B	4.22223	4.18658	5.77439	1.73017	5.96855	3.11704	6.2191	5.61609	4.22404	8.63509	5.21848	3.92228	2.79042	2.15913	3.40174
Chondroitin Sulfate	1.32004	1.36091	1.47568	1.24636	1.47938	1.0927	2.64073	1.3174	1.2772	3.35728	1.64041	2.29553	1.13047	1.17147	1.40604
COL17A1	1.28247	1.04218	1.30779	3.44264	1.45759	1.15787	1.94584	1.63958	1.28787	1.15991	2.08034	1.0876	2.04769	1.16907	1.30625
Collagen I	1.28136	1.23205	1.31691	1.21342	1.4368	1.04231	2.38884	1.1978	1.30209	3.02252	1.47882	1.83917	1.13073	1.17952	1.37711
Collagen II	1.26619	1.2637	1.27223	1.001	1.35075	0.996477	2.38824	1.18672	1.23498	3.61827	1.53036	1.87087	1.051	1.12787	1.23554
Collagen III	1.39808	1.48032	1.40482	1.22105	1.78223	1.15579	2.95901	1.3648	1.27231	3.14303	1.54671	2.19479	1.22564	1.16271	1.3898
Collagen IV	1.76473	1.93094	1.80527	1.19165	1.83382	1.52354	2.65939	1.90146	1.484	4.51939	1.88497	2.01743	1.23749	1.60849	1.41618
Collagen V	1.89917	1.44387	1.20961	1.64311	2.00022	1.65481	3.4704	1.21072	1.84267	4.26195	2.13468	1.4525	1.64513	1.50076	1.2874
Collagen VI	21.719	9.43823	24.0469	7.36649	6.68633	3.75786	9.46146	101.583	21.3621	13.3763	9.87775	48.0788	4.18596	5.6202	11.6026
complement C1q	5.77384	3.76115	3.66115	1.62341	2.80617	4.44039	6.46592	5.51058	5.18715	7.19805	5.42053	1.62759	4.29745	2.20685	1.22533
complement C3/C3a	3.18834	2.303	4.1322	1.001	4.54454	1.001	6.23315	2.27019	4.32996	1.6584	4.59526	1.86903	2.79556	1.76641	3.21536
Core Histone	2.24087	1.96813	2.57143	1.50633	2.88405	1.33948	4.07668	2.04936	2.00997	4.48549	2.89808	2.7599	1.79767	1.3061	2.1526
CRP	20.3024	26.8443	27.7478	17.9479	19.6429	15.6166	20.6732	29.2006	23.9158	21.2541	23.7465	20.6774	16.0443	16.0529	14.7115
dsDNA	2.8075	2.25268	1.90708	1.50766	2.23717	1.3387	3.19474	2.992	2.29609	3.84003	2.53196	1.74054	2.12852	1.36704	1.62044
EBNA1	68.883	100.497	23.1185	1.27143	109.901	73.6317	70.8824	22.6659	16.6952	58.7388	68.9185	60.366	73.996	56.3558	11.661
Elastin	45.5934	7.71344	2.93472	1.61639	26.6915	22.2201	27.4876	2.36652	4.51699	13.2988	21.9798	3.48083	10.4187	22.668	1.53663
Factor B	13.9277	5.96964	7.95701	2.9334	9.7892	7.35242	11.362	6.27453	6.37957	7.69582	11.4125	3.58526	4.69062	5.90477	1.94994
Factor D	2.78585	1.69472	1.50448	1.29887	2.40611	1.7888	5.75702	1.49137	1.57164	8.30296	3.04259	3.18659	1.59099	2.06259	1.63103
Factor H	18.3104	4.32697	10.7447	1.67762	9.15191	4.30804	8.27008	5.89912	7.41893	31.1157	29.9856	32.5358	3.49964	16.6175	2.74011
Factor I	4.18348	4.01342	4.63986	1.36693	3.81859	3.50969	5.40495	3.51659	3.5519	5.11572	4.71896	1.40226	2.44063	1.49101	1.74185
Factor P	1.92412	1.35109	1.24889	1.18536	1.3718	1.4574	2.4699	1.46196	1.44522	3.32632	1.59091	1.24147	1.4875	1.0994	1.17416
Fibrinogen IV	43.7947	3.56787	2.83652	1.35114	6.82217	2.80048	5.4841	3.64815	3.43843	5.51289	11.6332	2.22789	2.29371	2.05335	2.33274
Fibrinogen S	45.9158	3.35776	4.30746	2.46865	8.41655	3.03683	4.915	4.70146	3.48773	5.45618	11.7727	1.50753	2.81566	1.36783	2.42413
Fibronectin	4.48746	3.05578	3.51471	3.15921	10.8203	2.60619	4.38458	5.2691	4.03293	4.63667	11.2198	1.77516	2.32987	2.36984	2.85942
GAD65/GAD2	14.2233	8.27073	12.4614	3.35887	9.04051	7.75697	10.4084	6.62246	5.71797	6.97736	11.0968	6.55923	5.22298	11.2484	3.47909
GBM	3.04003	1.76365	2.58606	1.71594	2.60673	2.12569	3.36696	2.08741	2.0319	5.26924	2.26298	2.86016	2.09573	2.09502	2.13426
GDF-15	2.74996	3.25574	2.7457	1.13092	2.90538	1.39659	2.33351	1.9618	1.18469	3.49052	5.71721	1.55177	1.74445	1.12017	1.30128
GM-CSF	2.37845	2.49348	2.91528	1.50522	2.57279	1.71496	3.32522	2.25308	2.1169	3.61804	2.91146	1.47924	1.71268	1.34564	2.07497
GP2	4.02593	2.54708	2.30229	2.21053	1.59413	1.95524	3.27045	3.20372	2.45382	5.68548	3.63507	3.15123	2.52834	1.40872	2.24642
GP210	3.2546	2.14955	8.00362	1.87172	2.72377	2.3311	3.44839	2.24049	2.97489	4.11874	2.96137	2.62056	2.23458	1.79504	2.45307
Hemocyanin	14.1004	19.8394	23.1894	4.29771	13.25	8.03334	16.9823	12.8141	10.8925	13.4691	21.7843	27.492	11.8644	4.30544	14.6956
Heparan Sulphate	1.24889	1.35596	1.50121	1.26036	1.57845	1.16617	2.39851	1.40426	1.2727	3.57011	1.3331	1.39785	1.16505	1.29109	1.3783
Heparin	3.00325	1.55479	1.34194	1.19572	9.32882	1.17788	3.47725	2.50762	1.58641	3.35654	22.8859	1.55549	1.19201	1.1758	2.86028
Histone H1	8.14583	3.60544	10.2493	2.76095	4.298	3.6985	4.67161	3.77911	38.4591	4.76247	6.41316	4.98966	3.34459	48.5867	9.46169
Histone H2A	2.49964	2.6245	2.1341	1.22783	2.96451	1.48815	4.17874	1.92763	13.5983	2.84337	2.2612	1.67156	2.09435	3.28329	2.16203
Histone H2B	2.84013	2.35029	3.66162	1.56	3.73004	1.78482	4.75438	3.2581	4.32034	4.34929	2.96413	2.09597	2.34289	2.13677	1.97721
Histone H3	1.07524	1.30868	1.29877	1.11098	2.28149	1.22265	2.38174	1.86621	1.30525	4.88778	1.58268	1.46469	1.44764	1.13477	1.4976
Histone H4	1.27939	1.21845	1.24814	1.12855	1.37969	1.07476	3.03863	1.163	1.17728	5.07504	1.58569	2.02346	1.22262	1.15601	1.32548
IA2	2.37839	2.95494	4.36307	1.2928	3.15661	2.19676	5.90089	3.42638	2.65237	7.97397	3.97989	3.09635	2.52072	1.8221	2.47253
IFN-A1	2.51094	2.53937	1.78876	1.50338	2.72632	1.53696	5.3886	2.43598	2.23986	7.47764	3.47895	2.55843	1.96799	1.21867	2.15499
IFN-B	1.34673	1.63459	1.43815	1.2035	1.45342	1.04655	2.79121	1.33753	1.26447	3.48094	1.72384	2.09033	1.08551	1.1677	1.64862
IFN-E	1.34669	1.81077	1.35215	1.19362	1.52662	1.10081	2.33062	1.33255	1.24923	2.92417	1.60952	1.99697	1.09906	1.27438	1.54307
IFN-L2	1.71129	1.67232	1.70136	1.36321	1.92619	1.20956	4.04203	1.78057	2.09457	5.26175	2.17271	2.66883	1.47565	1.30924	1.92507
IFN-r	1.31551	1.42015	1.41148	1.11473	1.59828	1.07338	3.26857	1.30525	1.25046	5.24289	1.83753	1.50036	1.26089	1.13103	1.48528
IL-12	2.37144	2.47147	1.78795	1.16387	2.18074	1.56626	3.52001	4.49472	1.60784	7.78361	2.9449	2.19856	1.68335	1.2259	2.34199
IL-15	2.84798	2.09267	2.28969	1.95421	2.5369	1.72407	4.65859	2.47623	2.0339	6.2819	3.27262	1.99174	1.71721	1.20793	1.96145
Insulin	1.52506	1.60533	1.86393	1.22745	1.6194	1.32922	2.42989	1.76485	1.47171	3.33112	2.05968	2.32504	1.33165	1.45636	1.71046
Intrinsic Factor (IF)	1.38629	1.27769	1.34503	1.18875	1.42923	1.21055	2.28955	1.26929	1.33841	3.35986	1.66226	1.81144	1.22892	1.28504	1.46779
Jo-1	8.42033	9.09931	9.91676	2.54415	7.18757	6.00411	10.3489	12.1262	8.61308	12.4047	10.7047	11.922	5.89744	4.93197	4.99419
KU (P70/P80)	5.08892	4.25927	2.1778	1.85341	4.01261	3.08206	6.62157	5.55252	4.80137	8.41164	4.51151	6.68956	3.52766	2.23657	2.92852
La/SSB	4.7537	4.68247	4.31137	1.95319	3.73483	2.86583	7.92426	6.10445	5.54028	9.18342	5.87669	6.16897	2.95826	2.58239	2.53311
Laminin	2.92173	2.72227	2.89374	1.72286	3.03	1.586	5.6933	2.62689	2.76037	7.54202	3.78981	3.38878	2.04406	1.71988	2.42564
LC1	6.45643	5.44742	4.30595	1.74761	5.35478	4.7634	10.8636	4.93707	5.37941	9.04538	9.18468	5.98045	4.37783	1.5611	1.88981
LPS	11.0129	3.15089	4.99642	1.77231	15.7917	5.96634	20.4495	3.80895	4.91878	11.6456	8.25555	5.35212	5.58992	1.8829	11.7924
M2	2.56959	1.86882	2.30501	1.36595	1.80084	1.85057	2.58491	2.53242	1.58259	4.82934	2.63341	2.55054	2.61213	1.48634	2.55317
MDA5	3.08988	3.33592	3.20035	1.68419	3.01823	2.67477	5.60912	2.62479	2.35809	5.94161	3.54244	1.25519	2.90809	1.87584	3.40161
Mi-2	1.82092	1.71377	2.41425	1.48338	2.03191	1.27167	3.85136	1.82155	1.98177	4.2461	2.68636	2.57595	1.88323	1.72218	1.66537
Mitochondrial antigen	2.7562	15.8002	3.16557	1.85754	5.19806	2.05746	4.65597	2.90574	3.75925	5.30907	4.60027	4.49991	2.55786	3.69845	3.56223
MPO	2.06542	1.84232	2.15881	1.43895	2.28227	1.58363	2.68544	1.66692	1.78147	3.6657	2.44933	1.93246	1.94065	1.46843	2.17581
Muscarinic receptor	39.3887	7.89346	14.9544	3.40902	28.2739	8.8778	9.06605	6.4626	7.83266	7.33773	8.09431	5.71062	3.71941	3.74324	2.48472
Myelin basic protein (MBP)	1.92387	1.74504	2.13826	1.27856	2.63142	1.67842	3.45928	1.58521	1.58311	4.40672	2.01802	1.39933	1.73335	1.19901	1.48635
Myosin	4.17878	4.33509	6.05653	2.51646	4.4113	2.85333	3.93254	4.52988	4.17302	7.08896	6.25447	3.09259	2.94183	2.71229	3.05469
Myosin heavy & light chain	1.26575	1.26076	1.23495	1.30895	1.46097	1.15175	2.53106	1.31238	1.15092	3.7644	1.43577	1.97451	1.09202	1.18204	1.39824
Neuropilin-1	2.91576	3.10292	3.52446	2.31293	3.09044	2.23623	4.60518	3.2813	2.8577	5.07599	3.87837	3.06222	2.2215	2.25937	2.75233
Nucleolin	1.45946	1.26873	1.61144	1.22995	1.48412	1.15957	2.57783	1.5018	1.54656	3.63429	1.82068	2.11153	1.26015	1.27205	1.54961
Nucleosome antigen	2.92915	2.25302	4.9806	2.58148	3.65918	2.05886	4.51794	2.04882	4.01198	3.32513	4.97378	3.68203	2.0755	2.82956	2.42089
Nup 62	1.20071	1.16029	1.31081	1.17582	1.61994	1.06404	2.15612	1.25672	1.18042	3.12986	1.43352	1.99053	1.20328	1.19192	1.41919
PCNA	4.76121	4.41002	5.50406	2.76935	4.41271	3.63495	7.75775	5.2586	4.87326	8.6089	6.89459	5.01728	3.79261	2.90707	3.66076
Phosphatidyl-serine (PS)	4.09079	3.61844	4.66751	2.48186	3.28517	2.475	5.16431	3.58806	3.28986	7.66978	4.98428	4.17503	2.91871	2.47381	2.54479
PL-7	5.71658	5.38962	5.16453	2.8998	5.74146	6.18206	13.0649	12.0965	4.89559	8.54277	6.90362	2.98487	11.6073	2.82636	3.19973
PL-12	3.36988	3.053	4.34037	2.05073	3.63959	2.15068	6.93881	3.7342	2.84998	4.75277	6.65068	3.2028	2.69109	2.19867	2.60672
PM/Scl-75	3.15673	2.57653	11.7025	1.97808	3.90571	2.39859	4.57233	2.42058	2.35214	6.36372	3.98223	5.09348	2.51338	2.0815	2.61934
PM/Scl 100	1.86815	1.68723	1.47067	1.35616	2.28144	1.35541	5.42753	1.89223	1.7156	3.53319	2.43645	2.57306	1.57692	1.32963	1.29191
PR3	1.50599	1.4031	1.5561	1.26062	1.61416	1.1406	2.86779	1.46152	1.50633	3.63784	1.6364	1.95123	1.26838	1.27496	1.36611
Proteoglycan	1.49414	1.41104	1.50358	1.24372	1.68489	1.19343	2.79288	1.50106	1.34555	3.14381	1.86106	1.94409	1.33452	1.25625	1.51601
Prothrombin protein	2.29602	2.05592	2.71441	1.80395	2.40259	1.75538	3.18478	2.4539	2.33946	6.75635	2.66735	3.05863	1.83017	1.86432	2.24355
Ribo Phosphoprotein P0	1.51868	1.71123	1.57827	1.29118	1.73909	1.16363	2.47588	1.45658	1.41463	2.59746	1.68515	1.85409	1.22915	1.41146	1.74444
Ribo Phosphoprotein P1	1.70013	1.89754	2.23284	1.73867	2.45553	1.86622	3.1917	1.89437	1.75246	2.99711	1.69007	2.21445	1.81887	1.55453	1.92805
Ribo Phosphoprotein P2	2.39039	3.67084	4.22711	2.94975	4.48315	1.33514	2.72317	5.40739	2.05199	4.77696	2.22068	3.06758	2.58585	1.78277	1.9525
Ro/SSA (52 Kda)	3.29336	4.01771	5.8006	3.17955	3.10704	2.36878	4.19857	3.96509	4.69996	4.3719	4.42385	4.91913	2.64223	2.32802	3.04238
Ro/SSA (60 Kda)	5.62555	10.2654	9.98624	4.00345	8.79732	3.79569	8.68404	12.8931	3.44171	8.23943	8.27314	4.15605	12.6862	2.00472	1.63052
S100	1.35732	1.5829	1.80524	1.26173	84.6393	1.14689	2.72762	1.58077	1.35283	3.51313	2.48619	33.8113	1.637	1.5412	1.9813
Scl-70/Topoisomerase I	10.2764	2.4009	4.82066	2.12295	4.98868	2.75807	10.6826	2.53584	2.96358	3.04874	5.26045	4.3498	7.42408	2.16498	2.91787
Sm	2.63487	2.02219	3.32454	1.46702	3.51765	1.84428	3.57559	2.21835	4.09984	3.53049	4.29624	3.21096	2.50835	1.81373	2.58754
Sm/RNP	1.42857	1.3567	1.3676	1.17538	1.59083	1.13799	2.05571	1.51821	1.31791	3.37584	1.77638	1.97854	1.41651	1.22179	1.49619
SmD	1.95917	1.67981	1.88985	1.34181	1.96012	1.45691	2.74181	1.72798	3.31038	3.59156	2.09209	2.63058	1.52854	1.45769	1.76569
SP100	1.50502	1.74835	2.14669	1.40795	1.83211	1.41	2.75324	1.70777	1.74681	3.22469	2.2526	2.94358	1.60641	1.3787	1.56581
Sphingomyelin	1.18086	1.23141	1.24544	1.15966	1.35801	1.02355	1.83545	1.22271	1.24268	2.14068	1.42739	2.01289	1.11647	1.14618	1.38227
SRP54	2.55242	2.92959	2.5944	1.89113	2.43498	1.8921	3.89908	3.25231	1.8983	4.3125	5.8645	3.6258	2.3168	1.92018	1.87029
ssDNA	14.4856	9.68838	24.6776	7.60612	6.39646	4.82735	7.65862	109.968	34.4463	19.8735	12.7722	43.5999	5.05062	5.66374	17.5573
ssRNA	1.54758	1.21978	1.29041	2.42616	1.32318	1.01681	1.56435	1.4057	1.23853	2.43638	1.5352	1.67428	1.19162	1.10923	1.29332
TGF-B1	1.44188	1.37527	1.59378	1.08713	1.77242	1.20693	1.95178	1.46339	1.38413	1.95955	1.4916	1.53777	1.70539	1.28555	1.19498
Thyroglobulin	21.3209	4.4835	5.44171	3.06478	4.32452	4.08173	4.5845	4.58004	3.71914	48.6564	4.28204	20.0833	2.5369	2.62944	3.23216
TIF1 gama	3.11994	2.77788	3.25935	2.08457	3.17418	2.68969	3.69371	2.06635	3.87392	3.40419	2.92072	3.5594	2.77597	2.06814	2.4228
TNF-a	4.06894	3.82963	5.34664	3.03562	10.4468	2.60594	6.20863	5.4566	4.50784	4.48113	4.81362	6.39691	3.06492	2.766	3.40752
TPO	3.97116	2.41827	6.317	2.79751	4.18608	2.65917	4.09157	3.39325	2.8534	13.525	6.15351	4.21149	4.41901	2.85288	3.16672
Troponin-I	2.93525	1.9133	1.83353	3.10858	2.36632	1.98099	3.57217	3.96034	1.91353	3.39681	7.14016	2.83819	2.7191	3.02253	1.61789
TTG	8.9775	19.5244	18.3168	6.43448	11.4454	6.40128	14.0516	17.1969	9.95015	10.237	14.3513	8.47117	7.8135	6.4803	9.87135
TWEAK	2.44229	1.53912	2.02109	1.76307	3.78577	1.40719	2.56697	2.08011	1.85065	2.85016	2.07357	2.35222	1.79989	1.54138	1.98373
U1-snRNP 68/70	3.62842	3.63271	5.71732	2.47793	4.04837	2.47988	4.5839	3.2088	3.46319	4.21991	3.97144	3.98519	2.69175	2.59641	3.18275
U1-snRNP A	2.53456	1.86556	2.1104	1.27479	3.687	3.24593	5.30198	2.26512	4.31277	3.94396	2.90958	2.16716	2.60061	1.43108	1.50935
U1-snRNP B/B'	1.57451	1.46204	1.73766	1.24707	1.93046	1.16795	2.62222	1.43413	1.55982	2.80496	1.78867	2.28319	1.39154	2.12649	1.77977
U1-snRNP C	2.32891	2.28235	2.66072	1.7698	3.13825	1.58179	4.11945	2.0483	2.25481	3.97165	2.51642	3.01289	1.63291	1.83481	2.29442
Vimentin	1.59819	1.24968	1.46406	1.39799	2.02094	1.43676	3.18137	2.05442	1.95533	3.71407	2.27931	2.17675	1.66888	1.60191	1.66314
Vitronectin	2.26453	2.05268	2.35055	1.76672	2.36015	1.47959	3.3952	2.12706	2.18354	2.99337	2.32808	2.62102	2.04242	1.83304	2.24148
anti-Ig control 1	107.017	106.83	131.739	147.714	144.058	95.8736	138.876	145.046	146.286	89.1292	124.603	186.193	89.2746	149.468	168.056
anti-Ig control 2	106.229	96.1048	132.79	86.9368	153.127	49.2825	152.958	70.477	153.463	52.3786	130.896	89.578	93.0498	39.5458	140.548
anti-Ig control 3	45.4186	44.1207	75.0683	51.3337	80.5906	32.4445	69.9024	46.8909	83.2728	39.7055	69.1608	56.8043	54.2158	51.6447	35.3656
anti-Ig control 4	15.9699	15.4309	21.6998	11.1504	18.8467	17.6451	19.2281	21.8125	17.4652	16.7564	25.9384	19.655	17.8365	17.6596	17.3594
Ig control 1	102.181	117.902	97.8664	136.219	131.007	108.272	132.116	136.262	141.822	107.362	127.537	160.768	98.67	143.89	140.576
Ig control 2	76.7274	70.1449	98.186	62.0272	90.808	65.8168	95.6555	82.792	75.4167	63.874	77.2397	82.9694	62.5595	84.4985	54.926
Ig control 3	34.797	36.3371	40.677	36.2651	41.6306	27.1461	47.7963	33.4082	55.0562	28.0151	38.5833	39.3547	28.4428	44.4219	47.5224
Ig control 4	19.4701	13.944	22.0976	16.3579	27.9147	12.2102	25.8736	15.6896	23.8634	12.5673	19.7771	17.9918	13.6185	16.7394	18.8245

## Sheet: IgG_SBR-nor
ID	S2	S3	S4	S5	L1	L2	L3	A1	A2	A3	A4	C1	C2	C3	C4
Aggrecan	1.93981	1.81608	1.55214	1.49019	1.46047	1.45457	2.80175	1.47275	1.18834	3.91479	1.5712	2.24381	1.4538	1.18478	1.74153
AGTR	2.59525	7.93409	4.02826	1.72836	1.99507	2.10817	2.98052	2.60933	1.49483	3.82159	8.67082	1.42614	4.1149	1.30862	2.51959
Alpha-actinine	1.33609	1.40446	1.4234	1.29318	1.30749	1.26268	1.58819	1.18973	1.11474	2.07956	1.33099	1.91924	1.47831	1.03986	1.31374
Alpha Fodrin	2.43866	4.37669	3.4272	2.42258	2.21071	3.11271	3.20283	2.93092	2.08436	5.79005	4.01452	2.59474	8.35549	3.88266	1.95272
Amyloid	1.37224	1.38752	1.20949	1.1818	1.14906	1.001	1.77769	1.12121	1.03647	3.68343	1.27687	1.54975	1.3878	0.993202	1.14251
AQP4	13.2998	23.2296	20.1071	9.60002	15.4728	7.73756	18.0159	29.7288	11.2715	15.2166	11.1013	21.8053	10.6418	8.01542	9.41038
B2-microglobulin	1.66738	1.51113	1.83768	1.3249	1.56461	1.39437	2.16027	1.3382	1.33543	4.01031	1.81892	1.23853	1.703	1.05417	1.38755
B2 glycoprotein 1	3.77991	3.36859	5.94757	3.03373	3.45792	3.75539	4.58035	3.91642	3.31946	5.92275	4.87176	3.27874	3.09858	1.572	2.06479
B-actin	6.80431	12.529	8.79587	3.13876	7.33737	6.772	6.99499	9.77755	4.87265	10.299	7.76291	7.09199	6.29453	3.09067	1.89583
BPI	5.51567	19.054	6.07315	5.35095	4.59227	3.77695	5.62031	4.27335	4.51314	12.006	6.65113	5.50258	4.28853	2.48421	1.57189
Calprotectin	7.15974	14.5642	21.6503	17.3574	4.74636	5.48769	5.54442	12.845	12.1132	9.19369	8.24079	7.26392	6.08045	4.04251	3.2157
Cardolipin	1.82108	1.89445	2.75732	1.57584	1.65355	2.11959	4.04728	2.20647	1.49412	5.16548	2.41563	1.67572	2.14421	1.13802	1.31839
CD4	3.01131	2.49725	3.37723	1.27277	2.99704	2.22344	3.34564	2.41223	2.4652	4.73366	3.54663	9.82807	2.62825	1.05146	1.31715
CD8	2.15058	2.95735	2.54977	1.64918	1.94314	1.70028	3.95417	1.85983	1.94292	2.97252	2.35291	2.23065	1.87597	1.52862	1.37872
CENP-A	2.74269	2.16073	2.4495	15.6844	1.2741	2.54349	3.48965	1.81184	1.664	5.13875	4.21634	2.27175	2.35842	1.38902	1.70551
CENP-B	4.67026	4.53072	5.78113	1.77879	5.30953	3.75143	5.32117	5.40177	3.74286	10.5145	5.11498	3.49719	3.54025	1.92326	3.28827
Chondroitin Sulfate	1.46011	1.47278	1.47741	1.28138	1.31603	1.31509	2.25946	1.26712	1.13171	4.08797	1.60787	2.04674	1.43425	1.0435	1.35914
COL17A1	1.41856	1.12785	1.30931	3.53938	1.29665	1.39352	1.6649	1.57702	1.14116	1.41236	2.03908	0.969729	2.59795	1.04136	1.26268
Collagen I	1.41732	1.33333	1.31845	1.24751	1.27815	1.25444	2.04393	1.1521	1.15376	3.68035	1.44949	1.63984	1.43457	1.05066	1.33117
Collagen II	1.40055	1.36758	1.27371	1.001	1.20161	1.19928	2.04342	1.14143	1.0943	4.40576	1.50001	1.66811	1.33342	1.00466	1.19433
Collagen III	1.54643	1.602	1.40646	1.25536	1.58544	1.39101	2.53178	1.31272	1.12737	3.82709	1.51604	1.95692	1.55499	1.0357	1.34344
Collagen IV	1.95198	2.08966	1.80738	1.22514	1.63134	1.83361	2.27542	1.82889	1.31495	5.503	1.84759	1.79878	1.57003	1.43278	1.36894
Collagen V	2.1007	1.56256	1.21103	1.68928	1.77936	1.9916	2.96934	1.16452	1.63276	5.18954	2.09234	1.29508	2.08721	1.33681	1.24445
Collagen VI	24.0236	10.2141	24.075	7.57348	5.94806	4.52266	8.09539	97.7065	18.9286	16.2876	9.68185	42.8681	5.3108	5.00624	11.2155
complement C1q	6.38652	4.07032	3.66542	1.66902	2.49632	5.3441	5.53235	5.30029	4.59625	8.76466	5.31303	1.45119	5.45225	1.96577	1.18445
complement C3/C3a	3.52666	2.49231	4.13702	1.001	4.04275	1.001	5.33319	2.18356	3.83671	2.01934	4.50412	1.66647	3.54677	1.57345	3.1081
Core Histone	2.47866	2.12991	2.57444	1.54866	2.56561	1.61209	3.48808	1.97115	1.78101	5.46173	2.8406	2.46079	2.28073	1.16342	2.0808
CRP	22.4567	29.0509	27.7802	18.4523	17.474	18.7949	17.6883	28.0863	21.1914	25.8799	23.2756	18.4364	20.3557	14.2993	14.2208
dsDNA	3.10541	2.43786	1.90931	1.55002	1.99015	1.61116	2.73347	2.87783	2.03453	4.67579	2.48174	1.5519	2.70049	1.2177	1.56639
EBNA1	76.1924	108.758	23.1455	1.30715	97.7658	88.6172	60.6482	21.8009	14.7934	71.5229	67.5517	53.8237	93.88	50.1994	11.2721
Elastin	50.4314	8.3475	2.93814	1.66181	23.7444	26.7423	23.5188	2.27622	4.00244	16.1932	21.5439	3.10358	13.2184	20.1917	1.48537
Factor B	15.4055	6.46036	7.96629	3.01583	8.70832	8.84878	9.72153	6.03509	5.65284	9.37076	11.1862	3.1967	5.95107	5.25973	1.88489
Factor D	3.08146	1.83403	1.50623	1.33537	2.14043	2.15286	4.92581	1.43445	1.39261	10.11	2.98225	2.84124	2.01851	1.83727	1.57662
Factor H	20.2533	4.68265	10.7572	1.72476	8.1414	5.18481	7.07603	5.67401	6.57381	37.8878	29.3909	29.0097	4.44006	14.8022	2.64871
Factor I	4.6274	4.34332	4.64527	1.40534	3.39696	4.22398	4.62457	3.38239	3.14728	6.22913	4.62537	1.25029	3.09647	1.32813	1.68374
Factor P	2.12829	1.46215	1.25035	1.21867	1.22033	1.75401	2.11329	1.40617	1.28059	4.05028	1.55936	1.10692	1.88721	0.979298	1.13499
Fibrinogen IV	48.4419	3.86115	2.83983	1.38911	6.06889	3.37044	4.69229	3.50894	3.04674	6.71274	11.4025	1.98643	2.91007	1.82904	2.25492
Fibrinogen S	50.788	3.63377	4.31249	2.53802	7.48723	3.65489	4.20536	4.52205	3.09043	6.64368	11.5392	1.34414	3.57228	1.21841	2.34327
Fibronectin	4.96363	3.30696	3.51882	3.24799	9.62558	3.13661	3.75153	5.06803	3.57352	5.64582	10.9973	1.58277	2.95595	2.11096	2.76404
GAD65/GAD2	15.7326	8.95059	12.4759	3.45325	8.0423	9.33567	8.90557	6.36974	5.06661	8.49594	10.8767	5.84835	6.62649	10.0196	3.36303
GBM	3.36262	1.90862	2.58908	1.76416	2.3189	2.55831	2.88083	2.00775	1.80044	6.41605	2.2181	2.55018	2.65889	1.86615	2.06306
GDF-15	3.04176	3.52336	2.74891	1.1627	2.58458	1.68083	1.99659	1.88694	1.04974	4.25021	5.60382	1.38359	2.21322	0.997799	1.25787
GM-CSF	2.63083	2.69845	2.91868	1.54752	2.28871	2.06399	2.84512	2.1671	1.87575	4.40549	2.85372	1.31893	2.1729	1.19864	2.00575
GP2	4.45313	2.75645	2.30497	2.27265	1.41812	2.35317	2.79825	3.08146	2.17429	6.92289	3.56298	2.80971	3.20775	1.25483	2.17148
GP210	3.59995	2.32624	8.01295	1.92431	2.42302	2.80553	2.9505	2.15499	2.63601	5.01516	2.90264	2.33655	2.83505	1.59895	2.37124
Hemocyanin	15.5966	21.4702	23.2164	4.41847	11.787	9.66829	14.5303	12.3251	9.65172	16.4005	21.3522	24.5125	15.0526	3.83511	14.2054
Heparan Sulphate	1.38141	1.46742	1.50296	1.29577	1.40416	1.40351	2.05221	1.35067	1.12772	4.34713	1.30667	1.24635	1.47812	1.15005	1.33232
Heparin	3.32193	1.6826	1.34351	1.22932	8.29877	1.4176	2.97519	2.41193	1.4057	4.08706	22.432	1.38691	1.51233	1.04735	2.76487
Histone H1	9.0102	3.90182	10.2612	2.83853	3.82343	4.45122	3.99711	3.6349	34.0781	5.799	6.28597	4.44889	4.24334	43.2791	9.14607
Histone H2A	2.76488	2.84023	2.13659	1.26233	2.63718	1.79102	3.5754	1.85407	12.0492	3.46222	2.21635	1.4904	2.65714	2.92462	2.08991
Histone H2B	3.1415	2.54348	3.66589	1.60383	3.31818	2.14807	4.06793	3.13377	3.82819	5.29589	2.90535	1.86881	2.97247	1.90334	1.91125
Histone H3	1.18933	1.41626	1.30029	1.1422	2.02958	1.47148	2.03786	1.795	1.15656	5.95157	1.55129	1.30595	1.83665	1.0108	1.44765
Histone H4	1.41515	1.31861	1.24959	1.16026	1.22735	1.2935	2.59991	1.11862	1.04317	6.17959	1.55424	1.80416	1.55116	1.02973	1.28126
IA2	2.63077	3.19784	4.36816	1.32913	2.80807	2.64384	5.0489	3.29562	2.35023	9.70946	3.90096	2.76077	3.19808	1.62305	2.39006
IFN-A1	2.77739	2.74811	1.79085	1.54563	2.42529	1.84977	4.61058	2.34302	1.9847	9.1051	3.40995	2.28115	2.49683	1.08554	2.08311
IFN-B	1.48964	1.76895	1.43983	1.23731	1.29294	1.25955	2.38821	1.28649	1.12043	4.23855	1.68965	1.86379	1.3772	1.04014	1.59363
IFN-E	1.48959	1.95961	1.35373	1.22716	1.35805	1.32484	1.99412	1.2817	1.10693	3.56059	1.57759	1.78055	1.3944	1.13516	1.4916
IFN-L2	1.89288	1.80979	1.70335	1.40152	1.71351	1.45573	3.45844	1.71262	1.85597	6.40694	2.12962	2.37958	1.87218	1.16622	1.86085
IFN-r	1.4551	1.53689	1.41313	1.14606	1.42181	1.29183	2.79664	1.25544	1.10802	6.38397	1.80109	1.33775	1.59971	1.00748	1.43573
IL-12	2.62308	2.67463	1.79004	1.19657	1.93995	1.88503	3.01178	4.3232	1.42469	9.47766	2.8865	1.96029	2.13569	1.09198	2.26387
IL-15	3.15019	2.26469	2.29236	2.00912	2.25678	2.07496	3.98597	2.38173	1.80221	7.64912	3.20772	1.77588	2.17865	1.07597	1.89602
Insulin	1.68689	1.73729	1.8661	1.26194	1.44059	1.59974	2.07906	1.6975	1.30406	4.05611	2.01884	2.07305	1.68948	1.29727	1.65341
Intrinsic Factor (IF)	1.53339	1.38272	1.3466	1.22216	1.27142	1.45692	1.95898	1.22086	1.18594	4.09111	1.62929	1.61512	1.55915	1.14466	1.41883
Jo-1	9.31383	9.84729	9.92833	2.61564	6.39395	7.22607	8.85474	11.6635	7.63192	15.1045	10.4924	10.6299	7.48219	4.39319	4.8276
KU (P70/P80)	5.62891	4.60939	2.18035	1.90549	3.56955	3.70933	5.66553	5.34064	4.25443	10.2424	4.42204	5.96455	4.47561	1.99224	2.83083
La/SSB	5.25813	5.06738	4.3164	2.00807	3.32245	3.44909	6.78014	5.8715	4.90916	11.1821	5.76014	5.50039	3.7532	2.30028	2.44861
Laminin	3.23176	2.94604	2.89712	1.77128	2.69544	1.90879	4.87128	2.52665	2.44592	9.18349	3.71465	3.02151	2.59333	1.532	2.34472
LC1	7.14153	5.89521	4.31098	1.79672	4.76353	5.73285	9.29505	4.74867	4.76662	11.014	9.00252	5.3323	5.55424	1.39057	1.82677
LPS	12.1815	3.40989	5.00225	1.82211	14.048	7.18061	17.497	3.6636	4.35846	14.1802	8.09182	4.77206	7.09203	1.67721	11.399
M2	2.84225	2.02244	2.30769	1.40433	1.602	2.2272	2.21169	2.43578	1.40231	5.88042	2.58118	2.27412	3.31405	1.32397	2.468
MDA5	3.41776	3.61014	3.20408	1.73151	2.68497	3.21914	4.79926	2.52462	2.08947	7.23476	3.47219	1.11916	3.68954	1.67092	3.28814
Mi-2	2.01414	1.85465	2.41706	1.52506	1.80755	1.53049	3.29529	1.75203	1.75601	5.17023	2.63308	2.29677	2.38928	1.53404	1.60982
Mitochondrial antigen	3.04867	17.099	3.16926	1.90974	4.62412	2.47619	3.98373	2.79485	3.33101	6.46456	4.50903	4.01222	3.2452	3.29442	3.4434
MPO	2.28458	1.99377	2.16133	1.47938	2.03027	1.90594	2.29771	1.60331	1.57853	4.46352	2.40075	1.72302	2.46214	1.30801	2.10323
Muscarinic receptor	43.5684	8.54231	14.9719	3.50481	25.152	10.6846	7.75707	6.21599	6.9404	8.93474	7.93377	5.09172	4.71889	3.33432	2.40183
Myelin basic protein (MBP)	2.12802	1.88848	2.14075	1.31449	2.34087	2.02002	2.95982	1.52472	1.40277	5.36581	1.97799	1.24767	2.19913	1.06803	1.43677
Myosin	4.6222	4.69144	6.0636	2.58717	3.92422	3.43404	3.36475	4.35702	3.69765	8.63182	6.13043	2.75742	3.73235	2.41599	2.95279
Myosin heavy & light chain	1.40006	1.36439	1.23639	1.34573	1.29966	1.38616	2.16562	1.2623	1.01981	4.5837	1.4073	1.76052	1.38547	1.05292	1.35159
Neuropilin-1	3.22516	3.35798	3.52857	2.37792	2.7492	2.69135	3.94027	3.15609	2.53216	6.18074	3.80145	2.73034	2.81846	2.01255	2.66052
Nucleolin	1.61433	1.37302	1.61332	1.26451	1.32025	1.39557	2.20563	1.44449	1.37039	4.42527	1.78457	1.88269	1.59878	1.13309	1.49792
Nucleosome antigen	3.23997	2.43822	4.98641	2.65402	3.25515	2.47788	3.86563	1.97063	3.55496	4.04882	4.87514	3.28298	2.63323	2.52046	2.34014
Nup 62	1.32812	1.25567	1.31234	1.20886	1.44107	1.2806	1.84482	1.20876	1.04595	3.81105	1.40509	1.7748	1.52662	1.06171	1.37185
PCNA	5.26643	4.77253	5.51048	2.84717	3.92548	4.37474	6.63767	5.05792	4.31812	10.4826	6.75785	4.47352	4.81176	2.58949	3.53864
Phosphatidyl-serine (PS)	4.52487	3.91588	4.67296	2.5516	2.92243	2.97871	4.41867	3.45113	2.9151	9.33905	4.88543	3.72254	3.70302	2.20357	2.4599
PL-7	6.32317	5.83266	5.17056	2.98128	5.10752	7.44023	11.1786	11.6349	4.33791	10.402	6.76671	2.66137	14.7263	2.51761	3.09299
PL-12	3.72747	3.30397	4.34543	2.10835	3.23772	2.58839	5.93697	3.5917	2.52532	5.78718	6.51878	2.85568	3.41423	1.95848	2.51976
PM/Scl-75	3.49169	2.78832	11.7162	2.03366	3.47446	2.88675	3.91216	2.32821	2.0842	7.74874	3.90325	4.54146	3.18877	1.85411	2.53197
PM/Scl 100	2.06638	1.82592	1.47238	1.39426	2.02954	1.63126	4.64388	1.82003	1.52017	4.30217	2.38813	2.2942	2.00066	1.18438	1.24882
PR3	1.6658	1.51844	1.55791	1.29604	1.43593	1.37273	2.45373	1.40574	1.33474	4.42959	1.60395	1.73976	1.60922	1.13568	1.32054
Proteoglycan	1.65268	1.52703	1.50533	1.27866	1.49885	1.43632	2.38963	1.44378	1.19227	3.82804	1.82415	1.73339	1.69312	1.11901	1.46544
Prothrombin protein	2.53965	2.22492	2.71758	1.85464	2.1373	2.11264	2.72496	2.36026	2.07296	8.22683	2.61445	2.72714	2.32198	1.66066	2.16871
Ribo Phosphoprotein P0	1.67983	1.8519	1.58011	1.32746	1.54706	1.40045	2.11841	1.401	1.25348	3.16278	1.65173	1.65315	1.55945	1.25727	1.68625
Ribo Phosphoprotein P1	1.88053	2.05352	2.23544	1.78753	2.1844	2.24603	2.73087	1.82208	1.55282	3.64941	1.65655	1.97445	2.30763	1.38471	1.86373
Ribo Phosphoprotein P2	2.64404	3.97259	4.23204	3.03263	3.98814	1.60686	2.32999	5.20104	1.81824	5.81664	2.17664	2.73512	3.28072	1.58802	1.88737
Ro/SSA (52 Kda)	3.64282	4.34797	5.80737	3.26889	2.76397	2.85088	3.59237	3.81378	4.16456	5.32341	4.33611	4.38601	3.35224	2.0737	2.94089
Ro/SSA (60 Kda)	6.22249	11.1092	9.99789	4.11594	7.82596	4.56819	7.43021	12.4011	3.04965	10.0327	8.10906	3.70563	16.0952	1.78572	1.57612
S100	1.50135	1.71301	1.80735	1.29719	75.2938	1.38031	2.3338	1.52044	1.19872	4.27774	2.43689	30.1469	2.07689	1.37283	1.91521
Scl-70/Topoisomerase I	11.3669	2.59826	4.82628	2.1826	4.43785	3.31939	9.14019	2.43907	2.62598	3.71228	5.15612	3.87837	9.41907	1.92847	2.82054
Sm	2.91446	2.18841	3.32842	1.50824	3.12924	2.21963	3.05934	2.1337	3.63281	4.29888	4.21103	2.86296	3.18239	1.61559	2.50123
Sm/RNP	1.58015	1.46822	1.3692	1.2084	1.41517	1.36959	1.7589	1.46027	1.16778	4.11056	1.74115	1.76411	1.79716	1.08832	1.44628
SmD	2.16706	1.81789	1.89206	1.37952	1.7437	1.75342	2.34594	1.66204	2.93328	4.37324	2.0506	2.34548	1.93929	1.29845	1.70679
SP100	1.66473	1.89206	2.1492	1.44751	1.62982	1.69697	2.35572	1.6426	1.54782	3.92653	2.20792	2.62456	2.03808	1.22809	1.51358
Sphingomyelin	1.30616	1.33264	1.24689	1.19224	1.20807	1.23186	1.57045	1.17605	1.10112	2.60659	1.39908	1.79473	1.41648	1.02097	1.33616
SRP54	2.82326	3.1704	2.59743	1.94427	2.16612	2.27718	3.33612	3.1282	1.68206	5.25108	5.74819	3.23285	2.93937	1.71042	1.8079
ssDNA	16.0227	10.4848	24.7064	7.81984	5.69019	5.80982	6.55285	105.771	30.5223	24.1989	12.5189	38.8747	6.40781	5.04502	16.9716
ssRNA	1.7118	1.32005	1.29192	2.49433	1.17708	1.22375	1.33849	1.35206	1.09744	2.96665	1.50475	1.49282	1.51183	0.988054	1.25017
TGF-B1	1.59488	1.48832	1.59564	1.11767	1.57671	1.45256	1.66998	1.40754	1.22646	2.38603	1.46202	1.37111	2.16366	1.14511	1.15512
Thyroglobulin	23.5833	4.85205	5.44806	3.1509	3.84703	4.91245	3.92258	4.40526	3.29548	59.2462	4.19711	17.9067	3.21861	2.34219	3.12434
TIF1 gama	3.451	3.00622	3.26316	2.14314	2.8237	3.2371	3.1604	1.9875	3.43262	4.14509	2.8628	3.17364	3.52193	1.84221	2.34198
TNF-a	4.50071	4.14443	5.35287	3.12092	9.29331	3.1363	5.31221	5.24837	3.99433	5.45642	4.71815	5.70362	3.88852	2.46384	3.29385
TPO	4.39255	2.61705	6.32437	2.87612	3.72387	3.20037	3.50082	3.26376	2.52836	16.4686	6.03147	3.75506	5.60647	2.54123	3.06109
Troponin-I	3.24672	2.07058	1.83567	3.19593	2.10504	2.38416	3.05641	3.80921	1.69555	4.1361	6.99855	2.5306	3.44977	2.69234	1.56393
TTG	9.93012	21.1293	18.3382	6.61529	10.1816	7.70408	12.0228	16.5407	8.81668	12.465	14.0667	7.55308	9.91312	5.77238	9.54206
TWEAK	2.70145	1.66564	2.02345	1.81261	3.36776	1.69358	2.19635	2.00073	1.63983	3.47048	2.03245	2.09729	2.28355	1.373	1.91756
U1-snRNP 68/70	4.01344	3.93132	5.72399	2.54755	3.60137	2.98458	3.92206	3.08635	3.06868	5.13835	3.89268	3.55329	3.41508	2.31277	3.07658
U1-snRNP A	2.80351	2.01891	2.11286	1.31061	3.2799	3.90654	4.53646	2.17868	3.82149	4.80234	2.85187	1.93229	3.29944	1.27475	1.459
U1-snRNP B/B'	1.74159	1.58223	1.73968	1.28211	1.71731	1.40565	2.24362	1.3794	1.38213	3.41544	1.75319	2.03574	1.76547	1.89419	1.7204
U1-snRNP C	2.57604	2.46996	2.66383	1.81953	2.79174	1.90371	3.52467	1.97014	1.99795	4.83605	2.46651	2.68636	2.0717	1.63437	2.21789
Vimentin	1.76777	1.3524	1.46577	1.43727	1.7978	1.72917	2.72204	1.97602	1.73259	4.52241	2.23411	1.94083	2.11734	1.42692	1.60766
Vitronectin	2.50483	2.22142	2.35329	1.81637	2.09955	1.78072	2.90499	2.04589	1.9348	3.64486	2.28191	2.33696	2.59126	1.63279	2.16671
anti-Ig control 1	118.372	115.611	131.893	151.864	128.152	115.386	118.825	139.511	129.622	108.528	122.131	166.013	113.264	133.14	162.45
anti-Ig control 2	117.502	104.005	132.945	89.3797	136.219	59.3125	130.874	67.7875	135.981	63.7784	128.3	79.8697	118.054	35.2258	135.859
anti-Ig control 3	50.238	47.7475	75.1559	52.7761	71.6921	39.0477	59.8097	45.1015	73.7868	48.3471	67.7891	50.648	68.7846	46.003	34.1859
anti-Ig control 4	17.6645	16.6994	21.7251	11.4637	16.7658	21.2363	16.4519	20.9801	15.4757	20.4034	25.424	17.5248	22.6295	15.7304	16.7804
Ig control 1	113.024	127.594	97.9806	140.047	116.542	130.308	113.041	131.062	125.667	130.728	125.008	143.344	125.184	128.171	135.886
Ig control 2	84.8691	75.9109	98.3006	63.7702	80.7813	79.2119	81.8445	79.6326	66.8256	77.7758	75.7079	73.9773	79.3704	75.2678	53.0938
Ig control 3	38.4894	39.3241	40.7245	37.2841	37.0339	32.6709	40.8953	32.1333	48.7845	34.1124	37.8181	35.0895	36.0859	39.5692	45.9372
Ig control 4	21.5362	15.0902	22.1234	16.8176	24.8325	14.6952	22.1379	15.0908	21.145	15.3025	19.3849	16.0419	17.2781	14.9108	18.1965

## Sheet: IgG_SNR
ID	S2	S3	S4	S5	L1	L2	L3	A1	A2	A3	A4	C1	C2	C3	C4	SNR%>=threshld
Aggrecan	5.22	4.114	1.6455	3.225	5.1055	1.3255	3.38	2.9695	5.9715	3.7765	4.8515	2.994	4.0095	4.4475	2.0795	66.6667
AGTR	24.27	72.8295	32.765	12.0605	11.5645	5.259	18.9835	8.413	13.814	24.3545	88.414	4.588	32.377	7.1765	13.2675	100
Alpha-actinine	3.027	8.382	7.738	9.25	7.741	0.5955	15.1475	1.2685	8.35	10.454	8.0485	25.844	3.367	5.6795	2.3295	80
Alpha Fodrin	8.2385	51.2805	18.5105	39.321	7.0525	31.234	16.7655	23.345	10.338	47.122	22.327	20.3115	57.124	51.792	5.019	100
Amyloid	7.091	11.2	7.1935	8.146	8.125	1.882	17.579	0.5855	8.7135	28.724	9.863	23.9285	3.5645	5.756	3.1695	86.6667
AQP4	220.921	489.627	575.913	284.928	380.396	99.956	425.882	388.76	335.062	171.361	256.793	491.115	154.355	237.862	82.692	100
B2-microglobulin	7.7385	9.6935	14.3335	10.884	13.6695	4.327	18.4235	5.15	14.2445	35.8345	12.213	18.3455	6.4035	7.8475	3.185	100
B2 glycoprotein 1	31.9115	21.059	96.2305	42.1555	24.2745	19.117	64.8455	33.5635	70.4595	46.911	23.453	7.786	27.496	29.474	6.1275	100
B-actin	83.8295	230.474	118.948	37.616	121.394	63.5065	111.82	104.411	107.879	73.079	112.594	73.481	71.5085	72.274	18.1245	100
BPI	35.2355	126.254	39.47	11.1905	25.506	28.3955	22.655	20.0245	37.657	44.639	31.3675	14.3755	20.745	15.8285	7.774	100
Calprotectin	31.19	293.164	117.803	189.407	24.7245	44.2995	31.6015	38.5125	51.687	50.0905	47.259	26.79	41.1045	42.14	12.3985	100
Cardolipin	12.4785	30.3655	46.7255	33.381	16.162	8.88	50.488	14.561	18.919	54.2905	18.678	28.2085	18.4885	13.5995	2.9305	93.3333
CD4	39.396	46.0245	53.018	26.7465	45.723	18.159	39.9375	17.928	53.769	37.6925	54.983	283.297	22.968	22.277	10.546	100
CD8	21.49	59.1925	42.296	18.0935	29.4145	19.077	44.1245	22.7555	30.723	32.459	22.6325	44.35	13.111	36.9345	10.9635	100
CENP-A	12.0035	11.8595	15.656	45.9265	8.537	14.1095	23.2755	12.984	14.656	34.4355	30.2975	9.626	10.128	5.481	5.9525	100
CENP-B	32.258	74.6615	61.022	21.7635	72.5365	21.116	38.0595	46.4065	43.0555	62.761	68.507	44.913	21.9745	33.4655	20.399	100
Chondroitin Sulfate	7.052	8.1905	3.121	4.7355	5.376	2.817	20.1705	3.6575	6.9585	21.69	5.512	11.7915	3.7875	5.2925	4.0305	93.3333
COL17A1	1.837	0.634	1.76	1.2055	1.9015	0.194	2.2545	3.302	2.0955	0.3605	2.831	0.1455	3.3645	0.751	1.4565	13.3333
Collagen I	5.6525	7.7185	5.878	4.6445	4.75	3.0345	6.07	3.9205	6.321	34.75	6.932	12.9735	5.0705	6.7345	5.7185	100
Collagen II	9.3015	12.926	4.4865	8.9135	6.6905	4.707	18.2	4.915	3.6205	45.065	6.4205	14.8945	3.8605	10.424	0.5725	93.3333
Collagen III	8.3475	11.243	6.6345	8.3725	15.376	2.7355	25.71	4.9835	8.849	26.4245	14.1575	10.3345	6.59	9.1765	4.8915	93.3333
Collagen IV	5.497	20.426	4.165	10.4545	7.648	9.38	6.92	9.839	3.8715	44.5925	7.258	6.549	2.5075	2.5885	5.9675	86.6667
Collagen V	5.7805	18.7285	11.6725	10.528	8.2495	7.3035	12.0115	9.302	14.578	27.732	15.665	9.821	8.24	4.348	6.2485	100
Collagen VI	297.916	106.614	416.594	116.643	101.325	30.438	109.509	545.059	272.87	115.609	125.341	535.414	54.0425	108.032	70.658	100
complement C1q	55.616	47.4835	20.8805	24.1225	31.414	44.155	62.0215	40.3055	81.052	54.502	62.737	7.02	37.2555	18.95	10.7045	100
complement C3/C3a	20.7665	7.819	19.3755	0.001	17.2185	0.0475	14.428	11.578	24.1355	0.304	12.316	0.313	8.1045	5.692	10.5075	73.3333
Core Histone	25.2775	4.3595	32.6965	1.1955	39.0815	5.8915	21.866	11.0905	24.0665	44.1205	25.043	13.4835	17.6125	5.546	9.8545	93.3333
CRP	89.243	474.878	181.525	325.86	109.276	126.249	101.168	267.918	158.75	257.289	204.749	153.433	159.202	162.535	12.0455	100
dsDNA	18.2335	33.832	6.116	16.629	14.052	5.601	16.1425	16.347	24.351	29.0805	28.1375	14.594	18.5265	14.998	7.496	100
EBNA1	325.767	236.491	129.536	42.9085	618.965	197.027	377.69	155.611	591.167	392.325	252.536	267.361	462.098	257.161	59.432	100
Elastin	493.911	117.796	25.156	15.953	250.512	208.349	188.385	14.882	79.276	45.2615	259.224	33.2615	146.764	248.301	7.4325	100
Factor B	165.088	122.763	76.0085	32.596	87.6045	60.6775	66.948	59.782	146.279	78.9945	136.24	101.769	65.3325	111.079	13.8415	100
Factor D	23.236	12.746	3.817	8.723	12.528	11.4695	38.2235	6.9675	15.5735	70.4845	26.5575	4.809	9.3015	12.6705	4.4095	100
Factor H	228.72	59.647	99.7525	34.9225	116.894	21.364	66.35	48.953	90.1845	49.854	526.103	75.261	45.8945	189.274	17.3915	100
Factor I	31.4115	55.6375	34.6215	14.268	38.889	35.7155	58.828	32.0325	63.269	53.4335	25.193	19.7135	32.6575	22.1745	12.6725	100
Factor P	11.396	9.0415	4.9835	7.152	4.5705	6.7885	14.1135	7.1425	8.7815	35.681	9.3215	16.985	8.866	9.2485	3.953	100
Fibrinogen IV	271.897	29.73	8.298	12.7735	58.2365	29.7785	30.1255	22.8625	24.2455	53.3685	106.129	15.096	19.3165	17.6145	7.321	100
Fibrinogen S	242.297	10.1275	22.179	38.5965	43.7885	12.916	23.372	34.199	34.9435	45.4905	74.952	17.5735	32.8135	18.786	7.535	100
Fibronectin	33.2885	32.878	33.1515	37.886	78.6605	21.3575	22.847	49.639	54.5945	35.2895	131.751	25.69	24.5605	27.738	11.2155	100
GAD65/GAD2	159.042	152.988	63.781	47.3845	94.84	75.2695	11.726	55.653	23.1915	80.363	85.443	84.8585	23.953	78.901	1.281	93.3333
GBM	18.954	11.164	9.823	12.1075	9.5085	12.117	18.1655	12.404	16.315	32.465	6.594	8.127	15.759	14.651	7.641	100
GDF-15	16.5485	15.668	18.589	5.156	17.884	3.442	12.0545	7.697	3.096	12.4655	45.8585	6.272	13.309	3.6105	1.7435	93.3333
GM-CSF	13.525	17.3055	22.8185	8.593	21.4095	9.8845	25.444	14.765	21.7825	30.8805	18.1915	5.0885	14.193	14.9765	3.63	100
GP2	35.3255	9.2765	31.4565	8.3355	16.1855	6.754	23.628	17.6065	37.8005	57.306	14.495	5.566	25.2695	19.123	9.952	100
GP210	15.934	16.09	39.9265	9.961	9.1335	18.069	16.521	11.892	11.642	25.9355	16.9825	12.109	8.6755	13.1535	6.869	100
Hemocyanin	129.596	231.382	212.822	97.3875	121.582	56.361	132.827	138.75	99.9645	144.009	234.101	184.75	121.668	104.084	66.0405	100
Heparan Sulphate	5.141	9.901	11.6085	7.537	5.3455	3.219	13.007	7.2705	8.3905	30.2605	6.756	13.055	5.89	9.2835	3.8455	100
Heparin	23.122	11.8575	3.1375	6.4425	86.8415	2.9355	4.9315	13.2275	3.2735	29.7565	113.201	4.072	3.163	4.43	0.546	86.6667
Histone H1	178.469	124.052	123.386	85.009	42.27	63.654	36.1995	62.241	1054.43	70.9005	73.14	65.7295	64.6125	1285.85	70.337	100
Histone H2A	20.3005	32.9345	14.3025	8.5315	22.6785	8.0155	24.3955	7.99	148.87	17.9815	22.6685	3.7105	12.8915	69.4365	1.1525	93.3333
Histone H2B	20.475	24.5185	26.772	12.394	19.6735	7.849	8.2485	20.712	62.6285	38.3935	6.77	15.9645	20.993	32.8025	3.3925	100
Histone H3	5.2515	4.94	5.646	2.722	9.646	2.661	8.276	9.687	3.7675	41.115	7.7015	2.915	7.28	3.301	1.528	73.3333
Histone H4	4.68	6.7015	5.6705	4.388	3.302	2.3445	13.629	3.5	5.1485	54.438	10.087	21.1585	3.9005	4.6605	4.8125	93.3333
IA2	9.5165	13.013	21.655	17.7925	7.0135	5.0925	28.2155	22.631	21.3855	82.441	18.243	18.7525	20.863	23.484	10.148	100
IFN-A1	13.451	29.545	16.603	11.441	11.619	6.8395	14.837	13.6135	19.672	90.3475	14.1385	12.741	15.2955	9.703	7.374	100
IFN-B	5.8675	18.679	8.0125	10.0525	7.068	2.629	21.941	6.5705	11.1305	35.4625	12.8885	6.3075	4.8885	10.143	6.2235	93.3333
IFN-E	7.9595	22.058	4.8345	9.643	8.809	2.18	10.231	6.196	9.856	25.6725	12.6685	11.4665	5.012	12.929	1.1675	86.6667
IFN-L2	13.6915	15	5.686	10.3665	16.875	6.443	47.7345	9.844	27.465	59.031	16.7985	8.0775	8.661	10.1465	1.358	93.3333
IFN-r	2.7935	9.318	3.925	2.539	5.226	2.503	16.3045	4.2265	4.8355	41.1765	10.0785	9.795	6.1355	5.916	5.1505	80
IL-12	18.2355	11.243	13.9655	7.562	8.5325	7.993	17.819	35.9535	14.381	18.317	15.339	17.521	10.6695	10.197	7.053	100
IL-15	18.711	13.6165	9.58	7.3345	9.4945	5.2215	33.1925	7.7965	11.102	44.6425	28.2355	13.993	11.948	5.559	7.907	100
Insulin	3.4995	12.597	8.671	9.964	5.6615	5.3665	9.328	7.7815	6.966	27.461	8.2335	10.914	7.6	9.2975	3.298	100
Intrinsic Factor (IF)	3.5865	4.655	2.842	3.693	6.0905	2.3415	8.94	1.676	6.802	25.029	5.6215	9.777	4.6175	7.346	3.647	80
Jo-1	40.4765	64.723	98.523	54.3235	58.9695	26.976	41.7985	134.426	130.107	154.324	92.166	91.5985	44.854	78.1075	13.5015	100
KU (P70/P80)	23.023	53.0815	39.5335	35.3785	26.917	16.178	47.2585	48.0715	50.886	95.817	39.825	68.8865	36.279	42.858	16.6005	100
La/SSB	43.705	76.344	30.9385	35.575	34.1225	26.1875	70.4975	58.3435	82.227	105.327	53.934	24.9765	22.639	39.257	3.4505	100
Laminin	17.7845	29.6245	10.34	14.509	26.7185	6.4415	50.226	15.936	30.3905	78.007	42.646	7.803	15.738	15.9835	9.82	100
LC1	44.0285	61.307	22.1545	33.0145	32.906	39.236	74.982	37.4155	77.1245	63.4655	46.385	44.3195	48.7165	34.804	22.5295	100
LPS	49.356	25.0765	71.577	17.6435	90.423	49.14	105.928	35.6215	80.4405	38.1085	90.488	50.095	66.361	31.2435	30.4045	100
M2	21.775	33.357	18.5145	17.4855	14.888	6.003	12.0815	13.224	23.9245	55.693	14.4355	27.0805	21.445	15.629	14.5745	100
MDA5	17.4755	21.913	14.4775	11.0325	15.0025	5.297	15.2205	11.8565	12.4935	46.019	19.9705	10.6785	22.308	10.5945	6.3575	100
Mi-2	7.6265	4.8405	10.58	6.25	11.4045	3.5985	7.4375	10.6065	13.868	31.928	20.69	22.0365	14.5435	14.7885	9.724	100
Mitochondrial antigen	17.3055	102.915	15.305	15.163	50.981	10.2325	37.534	15.2495	27.849	49.121	42.3975	33.7975	19.9135	54.3835	19.1035	100
MPO	13.984	16.9495	16.4795	16.447	14.546	11.1545	12.8385	10.681	24.0625	34.373	29.15	11.585	18.929	13.792	7.924	100
Muscarinic receptor	313.001	93.0185	74.0515	45.8745	218.881	40.072	48.857	63.9745	109.816	58.626	59.396	34.932	32.2665	83.3845	18.5675	100
Myelin basic protein (MBP)	6.906	10.0715	5.1065	11.3425	10.9845	7.2005	13.868	7.341	10.1645	42.046	13.8365	10.018	11.9555	10.945	8.0125	100
Myosin	21.134	51.3265	33.7125	28.6965	19.4895	18.216	15.2355	41.111	62.4615	49.085	53.8125	24.007	31.185	41.25	2.73	93.3333
Myosin heavy & light chain	2.803	3.405	2.77	1.9715	4.375	1.7795	13.893	4.5565	3.663	19.108	8.3755	6.2445	2.2845	5.292	0.9385	60
Neuropilin-1	23.7445	12.421	24.8665	25.8575	11.8885	8.3215	24.245	19.1835	23.9795	29.5645	25.857	27.663	18.1855	20.4	10.935	100
Nucleolin	6.7865	3.062	5.399	6.1615	4.906	3.1805	6.183	6.978	6.254	29.1745	8.049	10.0685	6.344	7.383	5.0035	100
Nucleosome antigen	91.8275	57.0085	106.919	93.361	74.489	33.5305	118.787	24.009	145.827	78.0415	175.936	107.678	58.946	131.676	33.11	100
Nup 62	4.4145	6.6875	5.1755	8.227	7.5605	3.126	7.0585	4.744	6.8885	28.1115	8.897	7.1835	4.451	6.707	3.9	100
PCNA	55.193	27.4595	42.5865	44.784	32.682	18.8185	31.179	45.561	42	76.882	41.088	27.439	30.669	42.691	16.1845	100
Phosphatidyl-serine (PS)	26.975	38.045	24.3785	21.236	14.895	14.075	21.3235	24.478	25.072	71.0645	35.6805	29.5	15.9965	31.774	12.3885	100
PL-7	28.314	70.7805	77.6585	29.24	23.7485	49.224	56.1825	110.862	61.926	73.051	58.8825	28.2165	88.2955	47.177	6.264	100
PL-12	30.67	37.735	49.5175	15.4735	21.5755	13.546	12.2695	35.202	26.715	47.5525	56.842	4.293	25.8255	24.954	16.0575	100
PM/Scl-75	19.076	22.147	36.6905	12.989	7.506	10.842	6.483	16.7545	8.004	57.024	23.178	16.318	16.457	16.6745	9.4095	100
PM/Scl 100	15.0085	20.094	22.6075	12.3685	16.192	6.344	44.253	13.84	16.3915	36.069	27.0415	21.348	9.8745	11.1485	8.816	100
PR3	9.5715	12.5905	5.9625	5.518	6.8365	0.857	16.8845	6.636	14.106	28.916	9.013	13.359	5.804	9.5205	2.1165	86.6667
Proteoglycan	8.5085	11.984	5.7075	6.604	6.8625	2.1805	14.3205	5.8255	3.769	29.3105	7.173	9.272	4.887	7.476	2.759	86.6667
Prothrombin protein	17.8545	20.897	18.8755	16.078	10.866	8.9765	11.236	18.192	23.7225	68.9295	11.051	3.319	12.7355	12.455	10.3515	100
Ribo Phosphoprotein P0	11.9625	17.376	4.0335	6.81	8.5785	3.3105	3.496	1.774	8.422	21.2965	12.337	2.6065	8.072	10.3085	9.2375	86.6667
Ribo Phosphoprotein P1	7.87	18.19	16.3695	10.201	11.559	11.704	9.164	10.369	9.7525	13.0515	8.902	2.3415	8.3725	9.4435	6.3455	93.3333
Ribo Phosphoprotein P2	13.2065	40.248	27.4065	22.604	35.8235	4.546	12.1005	48.497	15.335	39.2355	16.682	25.3185	22.4625	20.101	7.305	100
Ro/SSA (52 Kda)	15.8635	46.509	42.4535	39.659	22.021	8.0795	11.8025	22.346	46.128	32.663	28.3355	19.836	24.561	30.5595	14.15	100
Ro/SSA (60 Kda)	64.2015	97.1575	63.983	43.74	76.9265	27.242	25.624	126.085	75.0625	101.091	80.2615	70.8555	198.812	88.329	9.0235	100
S100	4.5565	18.756	14.7285	8.206	661.688	2.2395	18.5745	7.0115	7.0765	35.802	20.1735	240.056	8.432	14.3335	5.715	93.3333
Scl-70/Topoisomerase I	42.25	14.969	28.9935	25.075	32.2115	30.6565	34.093	14.5495	27.362	25.751	42.9865	42.8635	34.121	24.16	14.416	100
Sm	12.1015	13.2565	26.134	10.0975	17.0515	7.435	20.5645	12.666	31.3845	31.895	31.805	12.939	12.7785	15.797	10.4915	100
Sm/RNP	5.951	8.598	4.9115	4.6755	4.4695	1.9215	4.6865	7.5525	6.691	23.991	10.1675	7.8295	7.8245	7.3425	4.2555	93.3333
SmD	7.01	3.393	6.658	5.2595	7.0425	4.567	1.334	7.338	18.845	10.823	9.385	5.9535	1.715	6.5355	5.7925	86.6667
SP100	3.9315	15.73	8.935	8.4215	5.915	5.1945	1.997	8.4675	14.97	24.882	9.4695	18.2315	7.7625	9.694	4.3125	93.3333
Sphingomyelin	4.661	7.0315	3.34	6.1035	5.77	1.9725	4.529	3.1465	5.353	18.3865	8.824	22.601	2.962	4.6835	0.8395	80
SRP54	12.309	27.963	26.916	20.4605	14.6245	7.2105	16.963	26.565	19.0605	48.2815	42.9745	29.597	21.443	20.0235	6.1715	100
ssDNA	112.948	105.064	134.164	92.246	49.2885	35.128	26.5195	163.071	94.684	112.557	97.2525	197.121	49.1875	79.3335	56.392	100
ssRNA	12.0715	6.3715	6.2315	26.5095	4.9335	2.433	6.361	4.5725	6.1165	20.891	9.94	10.215	4.517	6.9235	4.252	93.3333
TGF-B1	4.643	10.3855	6.3735	5.6755	8.5995	3.396	5.0715	5.261	7.1575	11.67	8.9575	4.861	29.1855	10.1165	7.528	100
Thyroglobulin	167.251	65.572	61.505	53.432	19.455	36.728	23.0525	47.9125	58.9455	580.568	59.071	244.083	29.312	36.678	24.368	100
TIF1 gama	17.746	20.0885	14.3935	14.8255	15.2835	17.117	8.665	13.6905	38.7905	24.235	11.4955	13.1	18.856	16.6855	4.121	100
TNF-a	29.1885	52.2065	58.249	29.42	67.8335	19.611	8.083	54.97	63.862	50.4155	30.091	44.1225	21.8875	33.7515	19.901	100
TPO	28.674	29.474	29.9225	32.6145	21.5315	11.247	11.101	26.8315	27.1425	168.9	54.8975	37.7275	42.307	42.4675	14.5485	100
Troponin-I	25.3095	24.9675	11.466	50.425	14.9285	12.478	22.577	35.493	21.119	31.2375	84.0195	33.423	30.917	42.431	9.474	100
TTG	68.684	278.295	131.745	104.891	111.481	32.4985	82.9865	60.684	46.7445	82.566	97.5	46.2915	84.9025	105.495	45.454	100
TWEAK	22.0585	14.408	17.5785	17.25	32.9295	7.115	13.7245	16.6385	18.991	30.482	15.464	16.6505	14.7365	16.031	12.1725	100
U1-snRNP 68/70	42.2475	64.479	33.9415	43.46	24.062	26.335	29.1665	31.1725	57.089	53.9885	37.1625	52.4215	35.407	59.75	33.84	100
U1-snRNP A	19.6775	18.264	14.7325	16.631	26.0735	24.617	24.003	14.423	45.436	40.3315	23.456	27.476	26.4925	20.956	11.468	100
U1-snRNP B/B'	11.021	12.442	10.0735	6.7675	7.941	2.4015	8.1875	5.5935	12.2865	26.703	4.956	16.715	9.403	22.455	4.743	93.3333
U1-snRNP C	4.5745	36.199	23.706	18.5665	19.293	10.4245	29.044	16.269	27.981	38.019	16.7055	41.5795	13.9605	22.804	15.4675	100
Vimentin	7.3935	8.6625	3.5985	12.0575	6.371	3.3735	6.873	13.0755	16.921	24.2555	17.628	21.363	8.9695	21.7195	7.0335	100
Vitronectin	7.7755	13.9565	10.217	12.4875	6.1595	8.546	6.4085	8.9515	16.749	5.14	11.271	5.4005	18.2505	15.7275	4.5685	100
anti-Ig control 1	742.322	283.382	723.734	323.567	604.185	286.798	673.851	470.52	1163.03	403.711	915.073	659.784	926.226	924.311	304.288	100
anti-Ig control 2	596.495	228.258	800.179	163.49	718.644	202.028	748.76	182.352	898.607	206.207	685.788	244.405	665.693	289.303	470.009	100
anti-Ig control 3	197.506	248.819	548.12	347.259	533.619	168.941	515.013	371.178	839.15	282.259	481.292	208.466	634.989	458.173	238.398	100
anti-Ig control 4	138.95	176.886	115.423	148.797	104.772	171.383	131.767	119.772	171.787	154.691	225.102	154.253	155.759	185.814	98.216	100
Ig control 1	367.161	355.236	271.793	1131.61	543.068	619.201	319.519	804.774	675.965	555.832	717.515	637.652	845.369	1239.74	450.472	100
Ig control 2	581.894	663.621	617.577	656.479	493.466	525.054	534.592	647.681	649.096	501.733	407.806	831.171	617.92	1367.72	460.375	100
Ig control 3	249.59	504.002	374.703	544.231	326.087	202.524	157.605	91.631	585.03	323.031	192.957	363.502	344.366	773.822	330.889	100
Ig control 4	107.344	126.375	111.07	189.91	174.358	113.717	45.081	98.668	211.765	23.4575	113.447	46.09	157.673	227.232	45.6955	100

[truncated: 3 more sheets: IgM+IgG NSI-nor, Heatmaps, Data interpretation]
